# Supplementary material for: Global incidence of surgical site infection after appendectomy: a systematic review and meta-analysis
Source: PubMed Central journal article supplement — BMJ Open. 2020 Feb 18;10(2):e034266. doi: 10.1136/bmjopen-2019-034266 (PMC7045165; doi:10.1136/bmjopen-2019-034266), 2020-02-18
Supplement: bmjopen-2019-034266.draft_revisions.pdf [file bmjopen-2019-034266.draft_revisions.pdf]

# BMJ Open

BMJ Open is committed to open peer review. As part of this commitment we make the peer review history of every article we publish publicly available.

When an article is published we post the peer reviewers' comments and the authors' responses online. We also post the versions of the paper that were used during peer review. These are the versions that the peer review comments apply to.

The versions of the paper that follow are the versions that were submitted during the peer review process. They are not the versions of record or the final published versions. They should not be cited or distributed as the published version of this manuscript.

BMJ Open is an open access journal and the full, final, typeset and author-corrected version of record of the manuscript is available on our site with no access controls, subscription charges or pay-per-view fees (<http://bmjopen.bmj.com>).

If you have any questions on BMJ Open's open peer review process please email [info.bmjopen@bmj.com](mailto:info.bmjopen@bmj.com)

# BMJ Open

## Global prevalence of surgical-site infection after appendectomy: a systematic review and meta-analysis

|                               |                                                                                                                                                                                                                                                                                                                                                                                                                                                                                                                                                                                                                                                                              |
|-------------------------------|------------------------------------------------------------------------------------------------------------------------------------------------------------------------------------------------------------------------------------------------------------------------------------------------------------------------------------------------------------------------------------------------------------------------------------------------------------------------------------------------------------------------------------------------------------------------------------------------------------------------------------------------------------------------------|
| Journal:                      | <i>BMJ Open</i>                                                                                                                                                                                                                                                                                                                                                                                                                                                                                                                                                                                                                                                              |
| Manuscript ID                 | bmjopen-2019-034266                                                                                                                                                                                                                                                                                                                                                                                                                                                                                                                                                                                                                                                          |
| Article Type:                 | Original research                                                                                                                                                                                                                                                                                                                                                                                                                                                                                                                                                                                                                                                            |
| Date Submitted by the Author: | 12-Sep-2019                                                                                                                                                                                                                                                                                                                                                                                                                                                                                                                                                                                                                                                                  |
| Complete List of Authors:     | Danwang, Celestin; Universite Libre de Bruxelles, School Of Public Health;<br>Bigna, Jean Joel; Centre Pasteur of Cameroon, Department of Epidemiology and Public Health<br>Tochie, Joel Noutakdie; Universite de Yaounde I Faculte de Medecine et des Sciences Biomedicales,<br>Mbonda, Aimé; Djohong District Hospital, Department of General Medicine<br>Mbanga, Clarence; Mankon Sub-divisional Hospital<br>Nzalie, Rolf ; Ngong District Hospital, North Region, Cameroon<br>Guifo, Marc Leroy ; Universite de Yaounde I Faculte de Medecine et des Sciences Biomedicales<br>Essomba, Arthur ; Universite de Yaounde I Faculte de Medecine et des Sciences Biomedicales |
| Keywords:                     | EPIDEMIOLOGY, Health policy < HEALTH SERVICES ADMINISTRATION & MANAGEMENT, Quality in health care < HEALTH SERVICES ADMINISTRATION & MANAGEMENT, Epidemiology < INFECTIOUS DISEASES, Public health < INFECTIOUS DISEASES                                                                                                                                                                                                                                                                                                                                                                                                                                                     |
|                               |                                                                                                                                                                                                                                                                                                                                                                                                                                                                                                                                                                                                                                                                              |

SCHOLARONE™  
Manuscripts

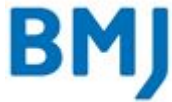

I, the Submitting Author has the right to grant and does grant on behalf of all authors of the Work (as defined in the below author licence), an exclusive licence and/or a non-exclusive licence for contributions from authors who are: i) UK Crown employees; ii) where BMJ has agreed a CC-BY licence shall apply, and/or iii) in accordance with the terms applicable for US Federal Government officers or employees acting as part of their official duties; on a worldwide, perpetual, irrevocable, royalty-free basis to BMJ Publishing Group Ltd ("BMJ") its licensees and where the relevant Journal is co-owned by BMJ to the co-owners of the Journal, to publish the Work in this journal and any other BMJ products and to exploit all rights, as set out in our [licence](#).

The Submitting Author accepts and understands that any supply made under these terms is made by BMJ to the Submitting Author unless you are acting as an employee on behalf of your employer or a postgraduate student of an affiliated institution which is paying any applicable article publishing charge ("APC") for Open Access articles. Where the Submitting Author wishes to make the Work available on an Open Access basis (and intends to pay the relevant APC), the terms of reuse of such Open Access shall be governed by a Creative Commons licence – details of these licences and which [Creative Commons](#) licence will apply to this Work are set out in our licence referred to above.

Other than as permitted in any relevant BMJ Author's Self Archiving Policies, I confirm this Work has not been accepted for publication elsewhere, is not being considered for publication elsewhere and does not duplicate material already published. I confirm all authors consent to publication of this Work and authorise the granting of this licence.

1  
2  
3  
4  
5  
6  
7  
8  
9  
10  
11  
12  
13  
14  
15  
16  
17  
18  
19  
20  
21  
22  
23  
24  
25  
26  
27  
28  
29  
30  
31  
32  
33  
34  
35  
36  
37  
38  
39  
40  
41  
42  
43  
44  
45  
46  
47  
48  
49  
50  
51  
52  
53  
54  
55  
56  
57  
58  
59  
60

# 1 Global prevalence of surgical-site infection after appendectomy: a 2 systematic review and meta-analysis

3  
4 Celestin Danwang, MD<sup>1,2</sup>, Jean Joel Bigna, MD<sup>3,4\*</sup>, Joel Noutakdie Tochie, MD<sup>1</sup>, Aime  
5 Mbonda, MD<sup>5</sup>, Clarence Mvalo Mbanga, MD<sup>6</sup>, Rolf Nyah Tuku Nzalie, MD<sup>7</sup>, Marc Leroy  
6 Guifo, MD<sup>1</sup>, Arthur Essomba, MD<sup>1</sup>

- 7  
8 1. Department of Surgery and Specialties, Faculty of Medicine and Biomedical Sciences,  
9 University of Yaoundé I, Yaoundé, Cameroon.  
10 2. School of Public Health, Université Libre de Bruxelles, Brussels, Belgium.  
11 3. Department of Epidemiology and Public Health, Centre Pasteur of Cameroon, Yaoundé,  
12 Cameroon.  
13 4. School of Public Health, Faculty of Medicine, University of Paris Sud XI, Le Kremlin-  
14 Bicêtre, Paris, France.  
15 5. Department of General Medicine, Djohong District Hospital, Djohong, Cameroon.  
16 6. Department of General Medicine, Mankon Sub-Divisional Hospital, Bamenda, Cameroon.  
17 7. Department of General Medicine, Ngong District Hospital, Ngong, Cameroon.  
18

19 \*Corresponding author: Dr. Jean Joel Bigna, MD, MPH

20 Department of Epidemiology and Public Health, Centre Pasteur of Cameroon, Yaoundé,  
21 Cameroon. E-Mail: [bignarimjj@yahoo.fr](mailto:bignarimjj@yahoo.fr)

22  
23 E-mail addresses:

24 CD: [danram07@yahoo.fr](mailto:danram07@yahoo.fr); JJB: [bignarimjj@yahoo.fr](mailto:bignarimjj@yahoo.fr); JNT: [joeltochie@gmail.com](mailto:joeltochie@gmail.com); AM:  
25 [aimembonda@yahoo.fr](mailto:aimembonda@yahoo.fr); CMM: [mbangaclarence@gmail.com](mailto:mbangaclarence@gmail.com); RNN: [nzaliierolf@yahoo.com](mailto:nzaliierolf@yahoo.com);  
26 GML: [marcleroyguifo@gmail.com](mailto:marcleroyguifo@gmail.com); AE: [artgessomba@gmail.com](mailto:artgessomba@gmail.com)

27  
28 **Word count:** 2,618.

## 29 **Abstract**

30 **Objectives:** Although surgical-site infection (SSI) is one of the most studied healthcare-  
31 associated infections, the global burden of SSI after appendectomy remains unknown. Hence,  
32 we estimated the incidence of SSI after appendectomy at global and regional levels.

33 **Design:** Systematic review and meta-analysis.

34 **Participants:** Global population of patients with appendectomy.

35 **Data sources:** EMBASE, Medline, and Web of Science were searched to identify observational  
36 studies, published between January 1, 2000 and December 30, 2018 and reporting on the  
37 incidence of the SSI after appendectomy with no language restriction. A random-effect models  
38 meta-analysis served to obtain the pooled incidence of SSI after 100 surgical procedures in  
39 patients with appendicitis.

40 **Results:** In total, 226 studies (729,434 participants from 49 countries) were included in the  
41 meta-analysis. Concerning the methodological quality, 59 (26.1%) studies had a low risk, 147  
42 (65.0%) a moderate risk, and 20 (8.8%) a high risk of bias. We found an overall incidence of  
43 SSIs of 7.0 per 100 surgical procedures (95% prediction interval: 1.0-17.6) for appendectomy  
44 varying from 0 to 37.4 per 100 surgical procedures. Subgroup analysis for identifying sources  
45 of heterogeneity showed that the incidence varied from 5.8 in Europe to 12.6 per 100 surgical  
46 procedures in Africa,  $p < 0.0001$ . The incidence of SSI after appendectomy increased when the  
47 level of income decreased; from 6.2 in high-income countries to 11.1 per 100 surgical  
48 procedures in low-income countries ( $p = 0.015$ ). Open appendectomy (11.0 per 100 surgical  
49 procedures) was found to have a higher incidence of SSI compared to laparoscopy (4.6 per 100  
50 surgical procedures),  $p = 0.0002$ .

51 **Conclusion:** This study suggests a high burden of SSIs after appendectomy in some regions  
52 (especially Africa) and in low-income countries. Strategies are needed to implement and  
53 vulgarize WHO guidelines to decrease the burden of SSI after appendectomy in these regions.

1  
2  
3 54 **Registration:** PROSPERO, CRD42017075257.  
4  
5  
6 55  
7  
8 56  
9

10 57 **Keywords:**  
11

12 58 Surgical wound infection; Global Health; Hospital infections; Cross infection; Healthcare  
13  
14  
15 59 associated infection  
16  
17  
18  
19  
20  
21  
22  
23  
24  
25  
26  
27  
28  
29  
30  
31  
32  
33  
34  
35  
36  
37  
38  
39  
40  
41  
42  
43  
44  
45  
46  
47  
48  
49  
50  
51  
52  
53  
54  
55  
56  
57  
58  
59  
60

For peer review only

## 60 **Strengths and limitations of this study**

- 61 • This systematic review with the meta-analysis is the first figuring-out a comprehensive  
62 global summary of the existing knowledge on the incidence of SSIs after appendectomy.
- 63 • It is also the first to summarize the burden of SSIs after appendectomy by all World Health  
64 Organization (WHO) regions and by country level of income.
- 65 • Using strong and robust methodological and statistical procedures, we found an overall high  
66 incidence of SSIs, seven per 100 surgical procedures, with substantial heterogeneity  
67 according to WHO regions and country level of income.
- 68 • WHO Afro region had the highest incidence. The incidence also increased with decreasing  
69 country level of income.
- 70 • All sources of heterogeneity for the variation in the incidence of SSI after appendectomy  
71 were not identified.

## 72 **Introduction**

73 Defined as an acute inflammation of the vermiform appendix (1), evidence abounds that acute  
74 appendicitis is the most common abdominal surgical emergency (2), with an incidence of  
75 almost 100 per 100,000 person-years reported in Australia, Europe and North America (3,4).  
76 Evidence suggests appendectomy, a surgical remove of the vermiform appendix as first-line  
77 treatment for acute appendicitis, although antibiotic therapy may be efficacious for a selected  
78 group of patients with uncomplicated acute appendicitis (5,6). Appendectomy is a relatively  
79 safe surgical intervention with a case fatality rate of 2.1 - 2.4 per 1000 patients as reported in  
80 studies conducted in Europe (7,8).

81 Innovations in appendectomy, especially with the advent of minimally invasive or laparoscopic  
82 surgery in 1983 (9), which has replaced the traditional open appendectomy in most of high-  
83 income countries, has led to a drastic reduction in the morbidity and mortality related to  
84 appendectomy (10–12). Laparoscopic appendectomy is now recognized as the gold standard  
85 surgical approach for uncomplicated acute appendicitis owing to its merits over open surgery;  
86 due to less postoperative pain, reduced postoperative ileus, shorter hospital stay, rapid  
87 postoperative recovery, and better aesthetic scars (13–17).

88 However, regardless of the surgical technique (laparoscopic or open surgery), appendectomy  
89 remains a sceptical surgical intervention associated with a substantial risk of surgical-site  
90 infections (SSIs). SSIs after appendectomy are postoperative nosocomial infections affecting  
91 the incision site, deep tissues, organs at the operative site within 30 days after the surgical  
92 procedure (18–21). SSI following appendectomy is a serious post-operative medical concern  
93 that increases the financial burden for both healthcare systems and patient, and also have a  
94 negative impact on the patients' health related quality of life (22–27).

95 SSI is both the most frequently studied and the leading healthcare-associated infections reported  
96 hospital-wide in low- and middle-income countries (28). A recently published prospective



1  
2  
3 97 international multicentre cohort study suggested a high burden of SSIs after any gastrointestinal  
4  
5 98 surgery in low-income countries compared to high-income countries (29). Actually, there is no  
6  
7  
8 99 global systematic review with meta-analysis reporting the burden of SSI after appendectomy or  
9  
10 100 comparing the burden between regions and between country level of income. It would be  
11  
12 101 interesting to have such accurately estimated data to construct efficient strategies to curb  
13  
14 102 globally the burden of SSIs after appendectomy. In an effort to fill this gap, the current  
15  
16  
17 103 systematic review and meta-analysis aimed at summarizing contemporary data on the  
18  
19 104 occurrence of SSIs after appendectomy.  
20

21 105

## 23 106 **Methods**

### 24 107 **Search strategy and selection criteria**

25  
26  
27  
28  
29 108 We searched EMBASE, Medline, and Web of Science (Web of Science Core Collection,  
30  
31 109 Current Contents Connect, KCI-Korean Journal Database, SciELO Citation Index, Russian  
32  
33 110 Science Citation Index) to identify observational studies, published between January 1, 2000  
34  
35 111 and December 30, 2018 and reporting data on the incidence of SSIs after appendectomy. No  
36  
37 112 language restriction was applied. The initial search strategy was designed for EMBASE and  
38  
39 113 was adapted for the use in others databases. The search strategy as illustrated in the study  
40  
41 114 protocol (30), was based on the combination of relevant text words and medical subject  
42  
43 115 headings related to SSIs. Moreover, the references of all relevant articles found were scrutinized  
44  
45 116 for potential additional data sources. When a full text was not available, it was requested via  
46  
47 117 the corresponding author by email. For duplicates or studies published in more than one report,  
48  
49 118 the one reporting the largest sample size was considered. We excluded letters, reviews,  
50  
51 119 commentaries and editorials, studies lacking key data and/or explicit method description as well  
52  
53 120 as studies in which relevant data on SSIs after appendectomy was impossible to extract even  
54  
55 121 after contacting the corresponding author.  
56  
57  
58  
59  
60

1  
2  
3 122 Two reviewers (CD and AM) independently screened the titles and abstract of articles for  
4  
5 123 eligibility. Full texts of potentially eligible articles were retrieved and screened for final  
6  
7 124 inclusion. Disagreements between the two reviewers were solved by discussion and when a  
8  
9 125 consensus was not reached, a third reviewer (JNT) resolved discrepancies.

## 12 126 **Data analysis**

15 127 A standardized and pretested data extraction form was used by five reviewers (CD, JNT, AM,  
16  
17 128 RNZ, CMM) to independently extract data from individual studies. A sixth reviewer (JJB)  
18  
19 129 independently extracted data for accuracy. The last name of the first author, year of publication,  
20  
21 130 country, study design, age groups, sample size, mean or median age, proportion of males,  
22  
23 131 specific conditions of the study population, the surgical method (open surgery or laparoscopy),  
24  
25 132 and incidence of SSIs after appendectomy in the study population (or enough data to compute  
26  
27 133 this estimate). For multinational studies, data was disaggregated, with the results shown within  
28  
29 134 individual country.

33 135 A meta-analysis was used to summarize data concerning incidence of SSIs, by pooling together  
34  
35 136 data of studies reporting the incidence of SSIs. Study-specific estimates were then pooled  
36  
37 137 through a Dersimonian and Laird random-effects meta-analysis model to obtain an overall  
38  
39 138 summary estimate of the incidence across studies, after stabilizing the variance of individual  
40  
41 139 studies using the Freeman-Tukey double arc-sine transformation (31). Incidence was expressed  
42  
43 140 by 100 surgical procedures with their 95% confidence interval and 95% prediction interval.  
44  
45 141 Heterogeneity was evaluated by the  $\chi^2$  test on Cochrane's Q statistic (32) which is quantified  
46  
47 142 by  $I^2$  values, assuming that  $I^2$  values of 25%, 50% and 75% represent low, medium and high  
48  
49 143 heterogeneity respectively (33). Where substantial heterogeneity ( $I^2 > 50\%$ ) was detected, a  
50  
51 144 subgroup analysis was performed to detect its possible sources using the following grouping  
52  
53 145 variables: type of surgery (laparoscopy or open), World Health Organization regions, and  
54  
55 146 country level of income. A  $p$  value  $<0.05$  was indicative of significant difference. The meta-  
56  
57  
58  
59  
60

1  
2  
3 147 regression analysis was performed to estimate the explained heterogeneity of each covariate  
4  
5 148 included in the subgroup analysis. Inter-rater agreement for study inclusion was assessed using  
6  
7 149 Cohen's  $\kappa$  coefficient (34). Funnel plots analysis and Egger's test ( $p < 0.10$ ) were performed to  
8  
9 150 detect the presence of publication bias (35). Since we believe that the incidence estimates of interest  
10  
11 151 would likely be published even if substantially different from previously reported estimates, we have  
12  
13 152 not reported adjusted incidence estimate in the case of publication bias.

14  
15  
16 153 To assess the methodological quality of each study, two reviewers (CD and CMM) used an  
17  
18 154 adapted version of the tool of bias assessment for prevalence studies developed by Hoy and  
19  
20 155 colleagues (36).

21  
22  
23 156 This review was registered in the International Prospective Register of Systematic Reviews  
24  
25 157 (PROSPERO) under the registration number CRD42017075257. The protocol has been  
26  
27 158 published in a peer-review journal (30).

### 28 29 30 159 **Patient and public involvement**

31  
32 160 Patients or the public were not involved in the design, or conduct, or reporting, or dissemination  
33  
34 161 of our research.

35  
36  
37 162

### 38 39 40 163 **Results**

41  
42 164 Overall, 619 records were initially identified. After removal of duplicates, screening of study  
43  
44 165 titles, abstracts, and full texts; 226 studies including 729,434 patients were finally retained for  
45  
46 166 meta-analysis (Supplementary Figure 1). The full list of included studies is in the Appendix.  
47  
48 167 Concerning the methodological quality, 59 (26.1%) studies had a low risk, 147 (65.0%) a  
49  
50 168 moderate risk and 20 (8.8%) a high risk of bias. Supplementary Table 1 presents characteristics  
51  
52 169 of included studies. Among the included studies, 154 were done in high-income, 36 upper-  
53  
54 170 middle, 27 lower-middle, and nine in low-income countries. Overall, most of studies were from  
55  
56 171 Europe ( $n = 68$ ) and Americas ( $n = 67$ ). SSIs were defined according to Center of Disease  
57  
58  
59  
60

1  
2  
3 172 Control and Prevention criteria in 50 studies while 25 studies used other criteria. The definition  
4  
5 173 of SSIs was not clearly given in 151 studies.

7  
8 174 The overall incidence of SSI after appendectomy was 7.0 per 100 surgical procedures (95%  
9  
10 175 prediction interval: 1.0-17.6) varying from 0% to 37.4% with substantial heterogeneity and  
11  
12 176 publication bias. The sensitive analysis including only studies with low risk of bias yielded a  
13  
14 177 very close incidence to crude analysis (Table 1).

16  
17 178 According to country level of income (Figure 1), the incidence of SSI after appendectomy  
18  
19 179 increased when the level of income decreased; from 6.2 in high income countries to 11.1 per  
20  
21 180 100 surgical procedures in low income countries ( $p = 0.015$ ) (Table 1).

23  
24 181 The incidence varied widely across WHO regions (Figure 2). The incidence varied from 5.8 in  
25  
26 182 Europe to 12.6 per 100 surgical procedures in Africa,  $p < 0.0001$  (Table 1). Two regions  
27  
28 183 (Europe and Americas) had an incidence  $< 6$  per 100 surgical procedures, three an incidence  
29  
30 184 between 6-10 per 100 procedures (South-East Asia, Eastern Mediterranean, and Western  
31  
32 185 Pacific), and one an incidence  $> 10$  per 100 procedures (Africa) (Table 1). The incidence also  
33  
34 186 varied widely in different regions. The incidence varied from 0.2 to 32.0 in Africa, from 1.9 to  
35  
36 187 37.4 in Western Pacific, from 1.3 to 33.8 in Eastern Mediterranean, from 1.2 to 25.8 in South-  
37  
38 188 East Asia, from 0.1 to 37.4 in Americas, and from 0 to 20.0 per 100 surgical procedures in  
39  
40 189 Europe (Figure 2).

42  
43  
44 190 Open appendectomy with an incidence of 11.0 (95% prediction interval: 0.0-39.3) per 100  
45  
46 191 surgical procedures was found to have a higher incidence of SSI compared to laparoscopic  
47  
48 192 appendectomy with an incidence of 4.6 (95% prediction interval: 0.0-14.3) per 100 surgical  
49  
50 193 procedures,  $p = 0.0002$  (Figure 3).

51  
52  
53 194 Heterogeneity of the overall incidence of SSI after appendectomy was explained by WHO  
54  
55 195 regions (17.1%), country level of income (11.1%), and type of surgical procedure (0.1%).

56  
57  
58 196  
59  
60

## 197 Discussion

198 This first systematic review and meta-analysis of data of 729434 surgical procedures in 226  
199 studies from 49 countries found an overall incidence of SSIs of 7.0 per 100 surgical procedures  
200 for appendectomy varying from 0 to 37.4 per 100 surgical procedures with substantial  
201 heterogeneity according to WHO regions, country level of income, and type of surgical  
202 procedure. The incidence increased with decreasing country level of income and was higher  
203 when using open surgery compared to laparoscopy. The incidence significantly varied by WHO  
204 regions with Africa having the highest burden followed by Western Pacific, Eastern-  
205 Mediterranean, and South-East Asia.

206 Health care-associated infections are acquired by patients when receiving care and are the most  
207 frequent adverse event affecting patient safety worldwide. This includes SSIs after  
208 appendectomy (37). As reported in a systematic review and meta-analysis, SSIs were the  
209 leading infection in hospitals in developed countries (28). The high incidence we found in this  
210 study suggests that SSIs after appendectomy remains a global public concern. WHO reported  
211 that of every 100 hospitalized patients at any given time, seven in developed and 15 in  
212 developing countries will acquire at least one health care-associated infection (37). SSIs are  
213 mainly caused by micro-organisms resistant to commonly-used antimicrobials, which can be  
214 multidrug-resistant. Indeed, more than 50% of SSIs can be antibiotic-resistant (38). The leading  
215 micro-organisms identified in SSIs are *Staphylococcus aureus*, coagulase-negative  
216 staphylococci, and *Escherichia coli* as reported by National Healthcare Safety Network (38). It  
217 is important to worry since *Staphylococcus aureus* and *Escherichia coli* are the micro-  
218 organisms with highest proportion of antibiotic resistance, respectively resistant to  
219 oxacillin/methicillin in 43% of cases and to fluoroquinolones in 25% of cases (38). A recent  
220 international prospective cohort study shown that 21.6% of patients with SSI after any  
221 gastrointestinal surgery had an infection that was resistant to the prophylactic antibiotic used

1  
2  
3 222 (29). There are many factors that can favour SSI including patient-related and procedural-  
4  
5 223 related variable (39). These factors can be classified in two categories; non-modifiable like age  
6  
7 224 and sex and modifiable including nutritional status, tobacco use, correct use of antibiotics,  
8  
9  
10 225 obesity, diabetes, prolonged surgery duration, pre-surgery hospital stay of at least two days,  
11  
12 226 lower volume of hospital and surgeons, and the intraoperative techniques (37). Strategies to  
13  
14 227 curb the burden of SSIs should therefore focus on addressing these identified factors.

16  
17 228 In our present study looking at specifically SSI after appendectomy, we also found that SSI was  
18  
19 229 higher in low income countries. Interestingly, there was a trend with increasing incidence when  
20  
21 230 the country income decreased. The WHO Africa region essentially constituted with sub-  
22  
23 231 Saharan Africa was the region with highest incidence in this study. The WHO estimates that  
24  
25 232 the endemic burden of health care-associated infections is two to three time significantly higher  
26  
27 233 in low- and middle-income countries than in high-income nations (37). The highest burden  
28  
29 234 found in Africa may be associated with the fact most of countries in this continent are low  
30  
31 235 income countries compared to other regions. Indeed, factors associated with increased risk of  
32  
33 236 SSI after appendectomy may be higher in low-income settings. The burden of diabetes, obesity,  
34  
35 237 and undernutrition are increasing in low-income countries (40,41). There is also inadequate use  
36  
37 238 of antimicrobial in low- and middle-income countries (42,43) and micro-organisms are more  
38  
39 239 resistant to prophylactic antibiotics used to prevent SSI in low-income countries compared to  
40  
41 240 high-income countries (29). Lower level income is also associated with lower volume of  
42  
43 241 surgeon and hospital, factors recognised as associated increased risk of SSIs (37). The higher  
44  
45 242 incidence found in low income countries may also be explained by the fact open surgery is the  
46  
47 243 most used surgical procedure in this setting. Indeed, we found as in other studies that open  
48  
49 244 surgery is associated with higher incidence of SSIs compared to laparoscopy (44,45).  
50  
51 245 Laparoscopy is generally indicated for uncomplicated appendicitis where the dissemination of  
52  
53 246 micro-organism is lower compared open surgery indicated for perforated appendicitis with  
54  
55  
56  
57  
58  
59  
60

1  
2  
3 247 peritonitis for example. Moreover, only few low-income countries have the necessary  
4  
5 248 infrastructure to carry out laparoscopy procedures compared to high-income countries (46–48).  
6  
7  
8 249 Our findings have important implications for healthcare providers and health policy makers.  
9  
10 250 SSIs are among the most preventable healthcare-associated infections (49,50). They still  
11  
12 251 represent a significant burden in terms of patient morbidity and mortality and additional costs  
13  
14 252 for healthcare systems (37). The prevention of SSI has received considerable attention from  
15  
16  
17 253 surgeons, infection control professionals, health policy makers, the media and the public since  
18  
19 254 there is a perception among the public that SSIs may reflect a poor quality of care (51).  
20  
21 255 However, special attention is needed for low-income countries and Africa. Strategy to curb the  
22  
23  
24 256 burden of SSIs after appendectomy as for other surgery procedures should be focused on  
25  
26 257 strategies than can help to address factors associated with increased risk of SSIs. Therefore,  
27  
28 258 strategies should be a package including how to address the factors cited above. The 26 WHO  
29  
30 259 recommendations to avoid SSIs should be vulgarized and implemented (37), especially in low-  
31  
32  
33 260 income countries. Strengthening the healthcare systems of low-income countries and of  
34  
35 261 countries in WHO Afro region is also a paramount by education of healthcare providers and  
36  
37 262 skilling them on the use of very less invasive surgical procedures.  
38  
39  
40 263 This study should however be interpreted in the context of some drawbacks. Firstly, the same  
41  
42 264 definition of SSIs was not used by all the included studies. This may lead to an overestimation  
43  
44 265 or underestimation of the SSIs incidence by individual studies (depending on the definition  
45  
46 266 used). Secondly, few studies reported on the associated conditions of the study population since  
47  
48  
49 267 this can modify the risk for developing SSIs. We were not therefore able to measure the impact  
50  
51 268 on our outcome of interest. Thirdly, only a quarter of studies had low risk of bias, however our  
52  
53 269 analysis including only studies with low risk of bias yielded an estimate close to the crude  
54  
55  
56 270 incidence. Fourth, the various geographic regions and countries were variably represented, with  
57  
58  
59  
60



1  
2  
3 271 some countries with only one study or even no study, which could affect the generalizability of  
4  
5 272 our findings.

6  
7 273 Despite these limitations, this is the first systematic review and meta-analysis providing a global  
8  
9 274 estimate of the burden of SSIs after appendectomy. A protocol had been published before, and  
10  
11 275 we used rigorous methodological and statistical procedures to obtain and pool data.  
12  
13 276 Furthermore, subgroup analyses were conducted to investigate the various factors likely  
14  
15 277 affecting our estimate.

16  
17 278 This systematic review and meta-analysis compiled data from more than 700,000 people with  
18  
19 279 appendicitis in 49 countries and pointed a high incidence of SSIs after appendectomy, at 7 per  
20  
21 280 100 surgical procedures. This estimate seemed higher in some WHO regions (especially Africa)  
22  
23 281 and in low-income countries. These data suggest that less invasive procedure is associated with  
24  
25 282 low incidence of SSIs after appendectomy. Strategies are needed to implement already known  
26  
27 283 guidelines to decrease the burden of SSI after appendectomy. However, in low-income  
28  
29 284 countries which have weak health systems, cost-effectiveness studies are needed to inform  
30  
31 285 policies regarding the best strategies for decreasing the burden of SSI after appendectomy.  
32  
33 286

34  
35  
36  
37  
38 286

### 39 40 287 **Contributors**

41  
42  
43 288 CD and JJB conceived the idea of the study and developed the protocol. JJB, CD, and JNT did  
44  
45 289 the literature search. CD, AM, and JNT selected the studies, CD, JNT, RNZ, AM, CMM, JJB  
46  
47 290 extracted the relevant information. CD, JJB, and CMM synthesized the data. CD, JNT, CMM,  
48  
49 291 and JJB wrote the first draft of the paper. CD, JJB, JNT, AB, RNZ, CMM, GML, and AE  
50  
51 292 critically revised successive drafts of the paper and approved the final version. GML and AE  
52  
53 293 supervised the overall work, CD and JJB are the guarantors of the review.

### 54 55 294 **Acknowledgements**

56  
57  
58  
59 295 None.  
60



1  
2  
3 296 **Funding**  
4

5 297 This research received no specific grant from any funding agency in the public, commercial or  
6  
7 298 not-for-profit sectors.  
9

10 299 **Competing interests**  
11

12 300 We declare no competing interests.  
13

14 301 **Patient consent**  
15

16 302 Not applicable.  
17  
18

19 303 **Data sharing statement**  
20

21 304 All data generated for this study are in the manuscript and its supporting files.  
22  
23  
24 305

25  
26 306 **Figures Legend**  
27

28 307 Figure 1. Global incidence of SSI (surgical site infection) after appendectomy by level of  
29  
30 308 country income  
31  
32

33 309 Figure 2. Global incidence of SSI (surgical site infection) after appendectomy by WHO regions  
34

35 310 Figure 3. Global incidence of SSI (surgical site infection) after appendectomy by type of  
36  
37 311 surgical procedures  
38  
39

40 312

41  
42 313  
43

44 314 **References**  
45

46  
47 315 1. Giesen LJX, van den Boom AL, van Rossem CC, den Hoed PT, Wijnhoven BPL.  
48  
49 316 Retrospective Multicenter Study on Risk Factors for Surgical Site Infections after  
50  
51 317 Appendectomy for Acute Appendicitis. *Dig Surg*. 2016 Sep 16;34(2):103–7.  
52  
53

54 318 2. Navarro JF, Tárraga PL, Rodríguez JM, López MC. Validity of tests performed to  
55  
56 319 diagnose acute abdominal pain in patients admitted at an emergency department. *Rev Espanola*  
57  
58 320 *Enfermedades Dig Organo Of Soc Espanola Patol Dig*. 2009 Sep;101(9):610–8.  
59  
60

- 321 3. Ohmann C, Franke C, Kraemer M, Yang Q. [Status report on epidemiology of acute  
322 appendicitis]. *Chir Z Alle Geb Oper Medizen*. 2002 Aug;73(8):769–76.
- 323 4. Körner H, Söreide JA, Pedersen EJ, Bru T, Söndena K, Vatten L. Stability in incidence  
324 of acute appendicitis. A population-based longitudinal study. *Dig Surg*. 2001;18(1):61–6.
- 325 5. Varadhan KK, Neal KR, Lobo DN. Safety and efficacy of antibiotics compared with  
326 appendectomy for treatment of uncomplicated acute appendicitis: meta-analysis of  
327 randomised controlled trials. *BMJ*. 2012 Apr 5;344:e2156.
- 328 6. Masoomi H, Nguyen NT, Dolich MO, Mills S, Carmichael JC, Stamos MJ.  
329 Laparoscopic appendectomy trends and outcomes in the United States: data from the  
330 Nationwide Inpatient Sample (NIS), 2004-2011. *Am Surg*. 2014 Oct;80(10):1074–7.
- 331 7. Kotaluoto S, Ukkonen M, Pauniahho S-L, Helminen M, Sand J, Rantanen T. Mortality  
332 Related to Appendectomy; a Population Based Analysis over Two Decades in Finland. *World  
333 J Surg*. 2017;41(1):64–9.
- 334 8. Blomqvist PG, Andersson RE, Granath F, Lambe MP, Ekblom AR. Mortality after  
335 appendectomy in Sweden, 1987-1996. *Ann Surg*. 2001 Apr;233(4):455–60.
- 336 9. Semm K. Endoscopic appendectomy. *Endoscopy*. 1983 Mar;15(2):59–64.
- 337 10. Xiao Y, Shi G, Zhang J, Cao J-G, Liu L-J, Chen T-H, et al. Surgical site infection after  
338 laparoscopic and open appendectomy: a multicenter large consecutive cohort study. *Surg  
339 Endosc*. 2015 Jun;29(6):1384–93.
- 340 11. Varela JE, Wilson SE, Nguyen NT. Laparoscopic surgery significantly reduces surgical-  
341 site infections compared with open surgery. *Surg Endosc*. 2010 Feb;24(2):270–6.
- 342 12. Bregendahl S, Nørgaard M, Laurberg S, Jepsen P. Risk of complications and 30-day  
343 mortality after laparoscopic and open appendectomy in a Danish region, 1998-2007;  
344 a population-based study of 18,426 patients. *Pol Przegl Chir*. 2013 Jul;85(7):395–400.
- 345 13. Sauerland S, Jaschinski T, Neugebauer EA. Laparoscopic versus open surgery for

- 1  
2  
3 346 suspected appendicitis. *Cochrane Database Syst Rev.* 2010 Oct 6;(10):CD001546.  
4  
5 347 14. Aziz O, Athanasiou T, Tekkis PP, Purkayastha S, Haddow J, Malinovski V, et al.  
6  
7 348 Laparoscopic versus open appendectomy in children: a meta-analysis. *Ann Surg.* 2006  
8  
9 349 Jan;243(1):17–27.  
10  
11  
12 350 15. Markides G, Subar D, Riyad K. Laparoscopic versus open appendectomy in adults with  
13  
14 351 complicated appendicitis: systematic review and meta-analysis. *World J Surg.* 2010  
15  
16 352 Sep;34(9):2026–40.  
17  
18  
19 353 16. Wei B, Qi C-L, Chen T-F, Zheng Z-H, Huang J-L, Hu B-G, et al. Laparoscopic versus  
20  
21 354 open appendectomy for acute appendicitis: a metaanalysis. *Surg Endosc.* 2011 Apr;25(4):1199–  
22  
23 355 208.  
24  
25  
26 356 17. Li X, Zhang J, Sang L, Zhang W, Chu Z, Li X, et al. Laparoscopic versus conventional  
27  
28 357 appendectomy--a meta-analysis of randomized controlled trials. *BMC Gastroenterol.* 2010 Nov  
29  
30 358 3;10:129.  
31  
32  
33 359 18. Horan TC, Gaynes RP, Martone WJ, Jarvis WR, Emori TG. CDC definitions of  
34  
35 360 nosocomial surgical site infections, 1992: a modification of CDC definitions of surgical wound  
36  
37 361 infections. *Infect Control Hosp Epidemiol.* 1992 Oct;13(10):606–8.  
38  
39  
40 362 19. European Centre for Disease Prevention and Control. Surveillance of surgical site  
41  
42 363 infections in Europe 2010-2011. Luxembourg: Publications Office; 2014.  
43  
44  
45 364 20. Culver DH, Horan TC, Gaynes RP, Martone WJ, Jarvis WR, Emori TG, et al. Surgical  
46  
47 365 wound infection rates by wound class, operative procedure, and patient risk index. National  
48  
49 366 Nosocomial Infections Surveillance System. *Am J Med.* 1991 Sep 16;91(3B):152S-157S.  
50  
51  
52 367 21. Horan TC, Andrus M, Dudeck MA. CDC/NHSN surveillance definition of health care-  
53  
54 368 associated infection and criteria for specific types of infections in the acute care setting. *Am J*  
55  
56 369 *Infect Control.* 2008 Jun;36(5):309–32.  
57  
58  
59 370 22. Badia JM, Casey AL, Petrosillo N, Hudson PM, Mitchell SA, Crosby C. Impact of  
60

- 1  
2  
3 371 surgical site infection on healthcare costs and patient outcomes: a systematic review in six  
4  
5 372 European countries. *J Hosp Infect.* 2017 May;96(1):1–15.  
6  
7  
8 373 23. Thompson KM, Oldenburg WA, Deschamps C, Rupp WC, Smith CD. Chasing zero:  
9  
10 374 the drive to eliminate surgical site infections. *Ann Surg.* 2011 Sep;254(3):430–6; discussion  
11  
12 375 436-437.  
13  
14 376 24. Hawn MT, Vick CC, Richman J, Holman W, Deierhoi RJ, Graham LA, et al. Surgical  
15  
16 377 site infection prevention: time to move beyond the surgical care improvement program. *Ann*  
17  
18 378 *Surg.* 2011 Sep;254(3):494–9; discussion 499-501.  
19  
20  
21 379 25. Alexander JW, Solomkin JS, Edwards MJ. Updated recommendations for control of  
22  
23 380 surgical site infections. *Ann Surg.* 2011 Jun;253(6):1082–93.  
24  
25  
26 381 26. Andersson RE. Short-term complications and long-term morbidity of laparoscopic and  
27  
28 382 open appendectomy in a national cohort. *Br J Surg.* 2014 Aug;101(9):1135–42.  
29  
30  
31 383 27. Impact of wound edge protection devices on surgical site infection after laparotomy:  
32  
33 384 multicentre randomised controlled trial (ROSSINI Trial) | *The BMJ* [Internet]. [cited 2018 Aug  
34  
35 385 22]. Available from: <https://www.bmj.com/content/347/bmj.f4305>  
36  
37  
38 386 28. Allegranzi B, Nejad SB, Combescure C, Graafmans W, Attar H, Donaldson L, et al.  
39  
40 387 Burden of endemic health-care-associated infection in developing countries: systematic review  
41  
42 388 and meta-analysis. *The Lancet.* 2011 Jan 15;377(9761):228–41.  
43  
44  
45 389 29. GlobalSurg Collaborative. Surgical site infection after gastrointestinal surgery in high-  
46  
47 390 income, middle-income, and low-income countries: a prospective, international, multicentre  
48  
49 391 cohort study. *Lancet Infect Dis.* 2018 May;18(5):516–25.  
50  
51  
52 392 30. Danwang C, Mazou TN, Tochie JN, Nzalie RNT, Bigna JJ. Global prevalence and  
53  
54 393 incidence of surgical site infections after appendectomy: a systematic review and meta-analysis  
55  
56 394 protocol. *BMJ Open.* 2018 Aug 30;8(8):e020101.  
57  
58  
59 395 31. Barendregt JJ, Doi SA, Lee YY, Norman RE, Vos T. Meta-analysis of prevalence. *J*  
60

- 1  
2  
3 396 Epidemiol Community Health. 2013 Nov 1;67(11):974–8.  
4  
5 397 32. Cochran: The combination of estimates from different... - Google Scholar [Internet].  
6  
7 398 [cited 2018 Aug 23]. Available from:  
9  
10 399 [https://scholar.google.com/scholar\\_lookup?hl=en&volume=10&publication\\_year=1954&pag](https://scholar.google.com/scholar_lookup?hl=en&volume=10&publication_year=1954&pages=101-129&journal=Biometrics&author=GW+Cochran.&title=The+combination+of+estimates+from+different+experiments)  
11  
12 400 [es=101-](https://scholar.google.com/scholar_lookup?hl=en&volume=10&publication_year=1954&pages=101-129&journal=Biometrics&author=GW+Cochran.&title=The+combination+of+estimates+from+different+experiments)  
13  
14 401 [129&journal=Biometrics&author=GW+Cochran.&title=The+combination+of+estimates+fro](https://scholar.google.com/scholar_lookup?hl=en&volume=10&publication_year=1954&pages=101-129&journal=Biometrics&author=GW+Cochran.&title=The+combination+of+estimates+from+different+experiments)  
15  
16 402 [m+different+experiments](https://scholar.google.com/scholar_lookup?hl=en&volume=10&publication_year=1954&pages=101-129&journal=Biometrics&author=GW+Cochran.&title=The+combination+of+estimates+from+different+experiments)  
17  
18 403 33. Huedo-Medina TB, Sánchez-Meca J, Marín-Martínez F, Botella J. Assessing  
19  
20 404 heterogeneity in meta-analysis: Q statistic or I<sup>2</sup> index? Psychol Methods. 2006 Jun;11(2):193–  
21  
22 405 206.  
23  
24 406 34. Viera AJ, Garrett JM. Understanding interobserver agreement: the kappa statistic. Fam  
25  
26 407 Med. 2005 May;37(5):360–3.  
27  
28 408 35. Egger M, Davey Smith G, Schneider M, Minder C. Bias in meta-analysis detected by a  
29  
30 409 simple, graphical test. BMJ. 1997 Sep 13;315(7109):629–34.  
31  
32 410 36. Hoy D, Brooks P, Woolf A, Blyth F, March L, Bain C, et al. Assessing risk of bias in  
33  
34 411 prevalence studies: modification of an existing tool and evidence of interrater agreement. J Clin  
35  
36 412 Epidemiol. 2012 Sep;65(9):934–9.  
37  
38 413 37. World Health Organization. Global guidelines for the prevention of surgical site  
39  
40 414 infection. 2016.  
41  
42 415 38. Sievert DM, Ricks P, Edwards JR, Schneider A, Patel J, Srinivasan A, et al.  
43  
44 416 Antimicrobial-resistant pathogens associated with healthcare-associated infections: summary  
45  
46 417 of data reported to the National Healthcare Safety Network at the Centers for Disease Control  
47  
48 418 and Prevention, 2009-2010. Infect Control Hosp Epidemiol. 2013 Jan;34(1):1–14.  
49  
50 419 39. Buggy D. Can anaesthetic management influence surgical-wound healing? Lancet Lond  
51  
52 420 Engl. 2000 Jul 29;356(9227):355–7.  
53  
54  
55  
56  
57  
58  
59  
60

- 1  
2  
3 421 40. Seidell JC, Halberstadt J. The global burden of obesity and the challenges of prevention.  
4  
5 422 *Ann Nutr Metab.* 2015;66 Suppl 2:7–12.  
6  
7  
8 423 41. Checkley W, Ghannem H, Irazola V, Kimaiyo S, Levitt NS, Miranda JJ, et al.  
9  
10 424 Management of NCD in low- and middle-income countries. *Glob Heart.* 2014 Dec;9(4):431–  
11  
12 425 43.  
13  
14 426 42. Versporten A, Zarb P, Caniaux I, Gros M-F, Drapier N, Miller M, et al. Antimicrobial  
15  
16 427 consumption and resistance in adult hospital inpatients in 53 countries: results of an internet-  
17  
18 428 based global point prevalence survey. *Lancet Glob Health.* 2018 Jun;6(6):e619–29.  
19  
20  
21 429 43. Klein EY, Van Boeckel TP, Martinez EM, Pant S, Gandra S, Levin SA, et al. Global  
22  
23 430 increase and geographic convergence in antibiotic consumption between 2000 and 2015. *Proc*  
24  
25 431 *Natl Acad Sci U S A.* 2018 10;115(15):E3463–70.  
26  
27  
28 432 44. Foster D, Kethman W, Cai LZ, Weiser TG, Forrester JD. Surgical Site Infections after  
29  
30 433 Appendectomy Performed in Low and Middle Human Development-Index Countries: A  
31  
32 434 Systematic Review. *Surg Infect.* 2018 Apr;19(3):237–44.  
33  
34  
35 435 45. Marchi M, Pan A, Gagliotti C, Morsillo F, Parenti M, Resi D, et al. The Italian national  
36  
37 436 surgical site infection surveillance programme and its positive impact, 2009 to 2011.  
38  
39 437 *Eurosurveillance.* 2014 May 29;19(21):20815.  
40  
41  
42 438 46. Udwardia TE. Diagnostic laparoscopy. *Surg Endosc.* 2004 Jan;18(1):6–10.  
43  
44  
45 439 47. Adisa AO, Lawal OO, Arowolo OA, Alatise OI. Local adaptations aid establishment of  
46  
47 440 laparoscopic surgery in a semiurban Nigerian hospital. *Surg Endosc.* 2013 Feb;27(2):390–3.  
48  
49 441 48. Alfa-Wali M, Osaghae S. Practice, training and safety of laparoscopic surgery in low  
50  
51 442 and middle-income countries. *World J Gastrointest Surg.* 2017 Jan 27;9(1):13–8.  
52  
53  
54 443 49. Haley RW, Culver DH, White JW, Morgan WM, Emori TG, Munn VP, et al. The  
55  
56 444 efficacy of infection surveillance and control programs in preventing nosocomial infections in  
57  
58 445 US hospitals. *Am J Epidemiol.* 1985 Feb;121(2):182–205.  
59  
60

- 1  
2  
3 446 50. Harbarth S, Sax H, Gastmeier P. The preventable proportion of nosocomial infections:  
4  
5 447 an overview of published reports. *J Hosp Infect.* 2003 Aug;54(4):258–66; quiz 321.  
6  
7 448 51. Birgand G, Lepelletier D, Baron G, Barrett S, Breier A-C, Buke C, et al. Agreement  
8  
9 449 among Healthcare Professionals in Ten European Countries in Diagnosing Case-Vignettes of  
10  
11 450 Surgical-Site Infections. *PLOS ONE.* 2013 Jul 9;8(7):e68618.  
12  
13  
14  
15  
16  
17  
18  
19  
20  
21  
22  
23  
24  
25  
26  
27  
28  
29  
30  
31  
32  
33  
34  
35  
36  
37  
38  
39  
40  
41  
42  
43  
44  
45  
46  
47  
48  
49  
50  
51  
52  
53  
54  
55  
56  
57  
58  
59  
60

For peer review only

**Table 1. Summary statistics of meta-analysis incidence of surgery site infections after appendectomy**

|                           | Incidence per 100 surgical procedures (95%CI) | 95% Prediction interval | N studies | N participants | H (95%CI)        | I <sup>2</sup> (95%CI) | P heterogeneity | P Egger test | P difference |
|---------------------------|-----------------------------------------------|-------------------------|-----------|----------------|------------------|------------------------|-----------------|--------------|--------------|
| <b>Global</b>             | 7.0 (6.4-7.7)                                 | 1.0-17.7                | 226       | 729,434        | 8.9 (8.7-9.1)    | 98.7 (98.7-98.8)       | < 0.0001        | < 0.0001     | -            |
| - Low risk of bias        | 6.9 (6.0-7.9)                                 | 1.6-15.2                | 59        | 204,450        | 6.7 (6.3-7.1)    | 97.7 (97.4-98.0)       | < 0.0001        | < 0.0001     | -            |
| <b>By Level of income</b> |                                               |                         |           |                |                  |                        |                 |              |              |
| - Low                     | 11.1 (5.5-18.2)                               | 0.0-42.2                | 9         | 1,496          | 3.8 (3.0-4.8)    | 93.1 (89.0-95.6)       | < 0.0001        | 0.735        | 0.015        |
| - Lower-middle            | 9.2 (6.3-12.6)                                | 0.0-31.6                | 27        | 10,379         | 5.1 (4.6-5.7)    | 96.2 (95.3-96.9)       | < 0.0001        | 0.960        |              |
| - Upper-middle            | 8.5 (6.5-10.8)                                | 0.3-25.3                | 36        | 26,557         | 5.4 (2.9-5.9)    | 96.6 (95.9-97.1)       | < 0.0001        | 0.392        |              |
| - High                    | 6.2 (5.6-6.9)                                 | 0.9-15.3                | 154       | 691,002        | 9.5 (9.2-9.8)    | 98.9 (98.8-99.0)       | < 0.0001        | < 0.0001     |              |
| <b>By WHO regions</b>     |                                               |                         |           |                |                  |                        |                 |              |              |
| - Africa                  | 12.6 (3.3-26.4)                               | 0.0-72.5                | 8         | 3,001          | 9.1 (7.9-10.5)   | 98.8 (98.4-99.1)       | < 0.0001        | 0.628        | < 0.0001     |
| - Western Pacific         | 9.6 (8.1-11.2)                                | 2.3-20.8                | 43        | 30,822         | 3.8 (3.5-4.2)    | 93.2 (91.7-94.4)       | < 0.0001        | 0.150        |              |
| - Eastern Mediterranean   | 8.2 (6.4-10.2)                                | 1.7-18.6                | 23        | 7,779          | 2.6 (2.2-3.1)    | 85.3 (79.1-89.6)       | < 0.0001        | 0.515        |              |
| - South-East Asia         | 7.6 (4.7-11.1)                                | 0.0-24.6                | 16        | 5,782          | 3.8 (3.2-4.5)    | 93.0 (90.1-95.0)       | < 0.0001        | 0.0001       |              |
| - Americas                | 5.9 (5.2-6.6)                                 | 1.9-11.7                | 67        | 401,931        | 7.5 (7.1-7.9)    | 98.2 (98.0-98.4)       | < 0.0001        | 0.0004       |              |
| - Europe                  | 5.8 (4.6-7.0)                                 | 0.0-19.1                | 68        | 276,793        | 10.4 (10.0-10.8) | 99.1 (99.0-99.1)       | < 0.0001        | < 0.0001     |              |



1  
2  
3  
4  
5  
6  
7  
8  
9  
10  
11  
12  
13  
14  
15  
16  
17  
18  
19  
20  
21  
22  
23  
24  
25  
26  
27  
28  
29  
30  
31  
32  
33  
34  
35  
36  
37  
38  
39  
40  
41  
42  
43  
44  
45  
46

| By type of surgical procedure   |                 |          |    |        |               |                  |          |        |        |  |
|---------------------------------|-----------------|----------|----|--------|---------------|------------------|----------|--------|--------|--|
| - Laparoscopy with open surgery | 4.6 (2.5-7.2)   | 0.0-15.6 | 10 | 4,892  | 3.2 (2.6-4.2) | 90.7 (85.0-94.2) | < 0.0001 | 0.942  | 0.0002 |  |
| - Laparoscopy                   | 4.6 (3.4-5.9)   | 0.0-14.3 | 40 | 33,873 | 4.4 (4.0-4.8) | 94.7 (93.6-95.7) | < 0.0001 | 0.0002 |        |  |
| - Open surgery                  | 11.0 (7.9-14.4) | 0.0-39.3 | 44 | 13,120 | 5.7 (5.2-6.1) | 96.9 (96.4-97.3) | < 0.0001 | 0.077  |        |  |

WHO: World Health Organization

For peer review only







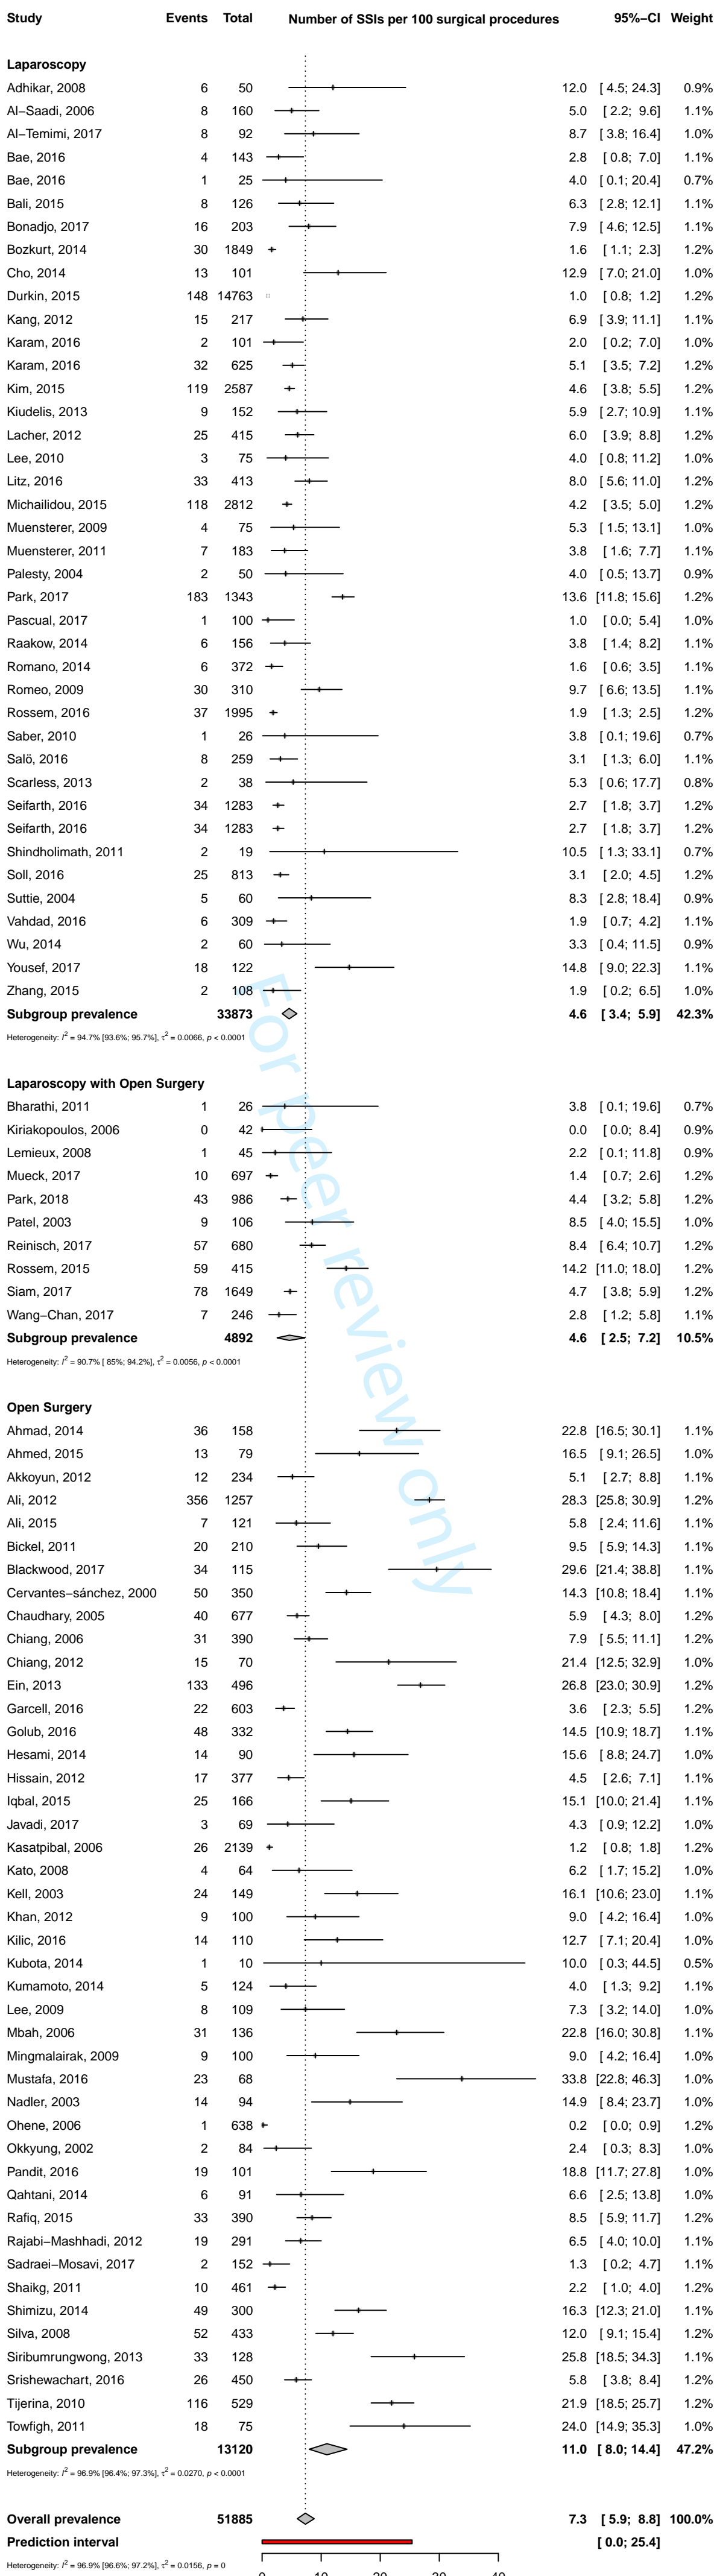

# Global burden of surgical-site infection after appendectomy: a systematic review and meta-analysis

## APPENDIX

---

Celestin **Danwang**, Jean Joel **Bigna**, Joel Noutakdie **Tochie**,  
Aime **Mbonda**, Clarence Mvalo **Mbanga**, Rolf Nyah Tuku **Nzalie**,  
Marc Leroy **Guifo**, Arthur **Essomba**

|                                                                         |   |
|-------------------------------------------------------------------------|---|
| <i>Supplementary Figure 1. Study Flow</i> .....                         | 2 |
| <i>Supplementary Figure 2. Funnel plot for publication bias</i> .....   | 3 |
| <i>Supplementary Table 1. Characteristics of included studies</i> ..... | 4 |
| <i>Reference list of included studies. References</i> .....             | 6 |

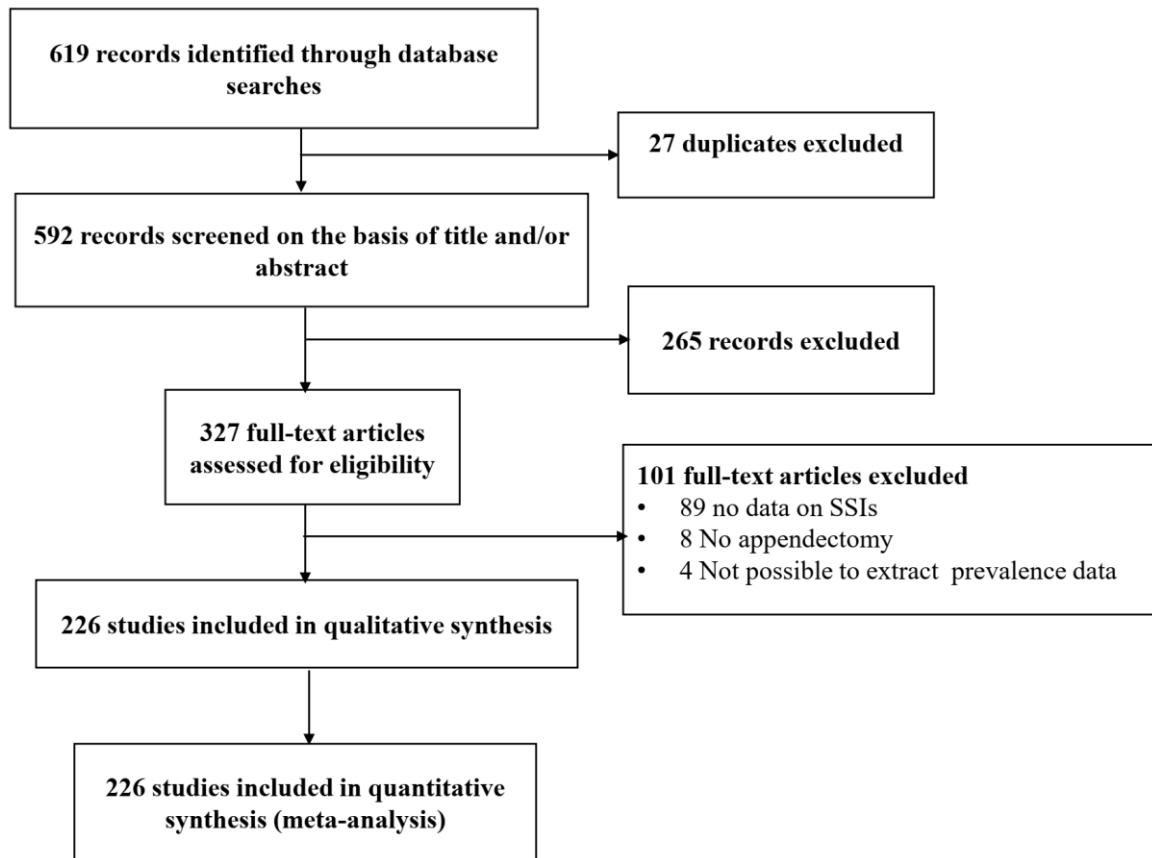

Supplementary Figure 1. Study flow

review only

1  
2  
3  
4  
5  
6  
7  
8  
9  
10  
11  
12  
13  
14  
15  
16  
17  
18  
19  
20  
21  
22  
23  
24  
25  
26  
27  
28  
29  
30  
31  
32  
33  
34  
35  
36  
37  
38  
39  
40  
41  
42  
43  
44  
45  
46  
47  
48  
49  
50  
51  
52  
53  
54  
55  
56  
57  
58  
59  
60

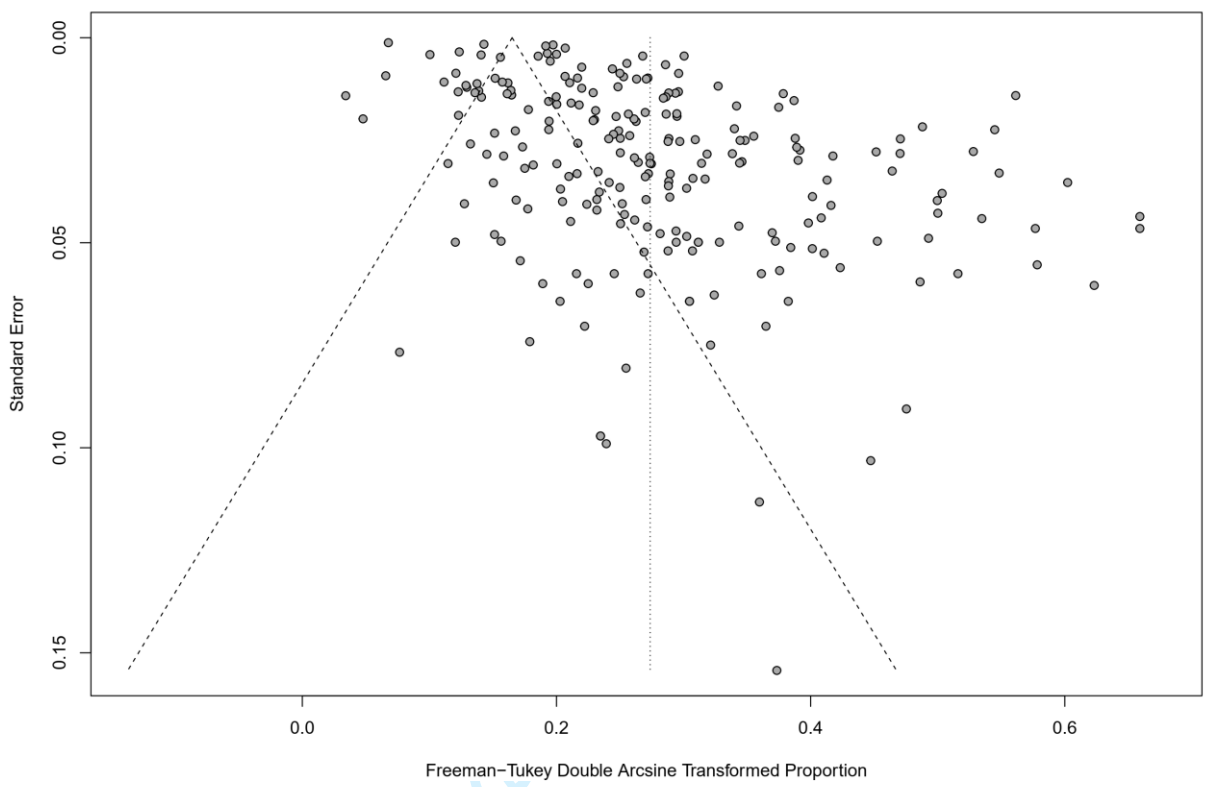

Supplementary Figure 2. Funnel plot for publication bias



Supplementary Table 1 : Characteristics of included studies

| <b>Characteristics</b>         | <b>N = 226</b>     |
|--------------------------------|--------------------|
| Year of publication, range     | 2000-2018          |
| %Male, range                   | 0-100 (n = 195)    |
| Mean/median age, range         | 7-74 (n = 186)     |
| %HIV                           | 0-13.1 (n = 2)     |
| %Diabetes                      | 0-95.7 (n = 34)    |
| %Obesity                       | 0-7.4 (n = 18)     |
| Design, n                      |                    |
| - Cross sectional              | 120                |
| - Cohort study                 | 99                 |
| - Case control                 | 7                  |
| WHO regions, n                 |                    |
| - Africa                       | 8                  |
| - Americas                     | 67                 |
| - Eastern Mediterranean        | 23                 |
| - Europe                       | 68                 |
| - Multiregional                | 1                  |
| - South-East Asia              | 16                 |
| - Western Pacific              | 43                 |
| Level of income, n             |                    |
| - Low                          | 9                  |
| - Lower-middle                 | 27                 |
| - Upper-middle                 | 36                 |
| - High                         | 154                |
| Timing of data collection      |                    |
| - Retrospective                | 123                |
| - Prospective                  | 101                |
| - Unclear                      | 2                  |
| Sampling                       |                    |
| - Consecutive                  | 131                |
| - Systematic                   | 37                 |
| - Random                       | 32                 |
| - Exhaustive                   | 11                 |
| - Unclear                      | 15                 |
| Number of sites                |                    |
| - Multisite                    | 51                 |
| - One site                     | 170                |
| - Unclear                      | 5                  |
| Pattern of appendicitis, range |                    |
| - %Catarrhal                   | 0-100 (n = 84)     |
| - %Perforated                  | 0-100 (n = 110)    |
| - %Suppurated                  | 0-100 (n = 70)     |
| - %Gangrenous                  | 0-46.7 (n = 89)    |
| %With administered antibiotics | 24.1-100 (n = 109) |
| %With administered analgesics  | 64.5-100 (n = 20)  |
| %With diet > 6 or 8 hours      | 50-100 (n = 3)     |
| Type of surgery                |                    |
| - %Open surgery                | 0-100 (n = 134)    |



1  
2  
3  
4  
5  
6  
7  
8  
9  
10  
11  
12  
13  
14  
15  
16  
17  
18  
19  
20  
21  
22  
23  
24  
25  
26  
27  
28  
29  
30  
31  
32  
33  
34  
35  
36  
37  
38  
39  
40  
41  
42  
43  
44  
45  
46  
47  
48  
49  
50  
51  
52  
53  
54  
55  
56  
57  
58  
59  
60

|                                                                 |                   |
|-----------------------------------------------------------------|-------------------|
| - %Laparoscopy                                                  | 0-100 (n = 187)   |
| Mean/median time to complete the intervention (in hours), range | 0.1-2.2 (n = 106) |
| Type of anesthesia, n                                           |                   |
| - General                                                       | 118               |
| - Spinal and general                                            | 2                 |
| - Unclear                                                       | 106               |
| SSI definition, n                                               |                   |
| - CDC-NNIS criteria                                             | 50                |
| - Other criteria                                                | 25                |
| - Not reported/Unclear                                          | 151               |

---

For peer review only

## References

1. Adejumo A.A., N.M., Mshelia, Y.M., Saleh. Clinicopathological presentation and management outcome of appendicitis in gombe, north-east nigeria: a 7-year retrospective audit. *Niger J Med.* 2015;24(4):337-43.
2. Aguiló J., S., Peiró, C., Muñoz, J., García del Caño, M., Garay, V., Viciano, et al. Adverse outcomes in the surgical treatment of acute appendicitis. *Efectos adversos en la cirugía de la apendicitis aguda.* 2005;78(5):312-7.
3. Adhikary S., S., Tyagi, G., Sapkota, A., Afaq, B.K., Bhattarai, C.S., Agrawal. Port exteriorization appendectomy: is it the future? *Nepal Med Coll J.* 2008;10(1):30-4.
4. Ahmad M., K., Ali, H., Latif, S., Naz, K., Said. Comparison of primary wound closure with delayed primary closure in perforated appendicitis. *J Ayub Med Coll Abbottabad.* 2014;26(2):153-7.
5. Ahmed I., J., Burr, M., Castillo, D., Collins, J.A., Cook, M., Campbell, et al. Single port/incision laparoscopic surgery compared with standard three-port laparoscopic surgery for appendectomy: A randomized controlled trial. *Surg Endosc Interv Tech.* 2015;29(1):77-85.
6. Akkoyun I., A., Taş Tuna. Advantages of abandoning abdominal cavity irrigation and drainage in operations performed on children with perforated appendicitis. *J Pediatr Surg.* 2012;47(10):1886-90.
7. Al-Saadi A.S., A.H., Al-Wadan, S.A., Hamarnah, H., Amin. Is abandoning routine peritoneal cultures during appendectomy justified? *Saudi Med J.* 2007;28(12):1827-9.
8. Al-Temimi M.H., M.A., Berglin, E.G., Kim, D.J., Tessier, S.D., Johna. Endostapler versus Hem-O-Lok clip to secure the appendiceal stump and mesoappendix during laparoscopic appendectomy. *Am J Surg.* 2017;214(6):1143-8.

- 1  
2  
3 9. Ali N., S., Aliyu. Appendicitis and its surgical management experience at the University of  
4 Maiduguri Teaching Hospital Nigeria. *Niger J Med.* 2012;21(2):223-6.  
5  
6  
7
- 8  
9 10. Ali K., H., Latif, S., Ahmad. Frequency of wound infection in non-perforated appendicitis  
10 with use of single dose preoperative antibiotics. *J Ayub Med Coll Abbottabad.*  
11 2015;27(2):378-80.  
12  
13
- 14  
15  
16 11. Almström M., J.F., Svensson, B., Patkova, A., Svenningsson, T., Wester. In-hospital  
17 surgical delay does not increase the risk for perforated appendicitis in children. *Ann Surg.*  
18 2017;265(3):616-21.  
19  
20  
21
- 22  
23 12. Álvarez-Moreno C., A.M., Pérez-Fernández, V.D., Rosenthal, J., Quintero, E., Chapeta-  
24 Parada, C., Linares, et al. Surgical site infection rates in 4 cities in Colombia: Findings of  
25 the International Nosocomial Infection Control Consortium (INICC). *Am J Infect Control.*  
26 2014;42(10):1089-92.  
27  
28  
29
- 30  
31  
32 13. Andert A., H.P., Alizai, C.D., Klink, N., Neitzke, C., Fitzner, C., Heidenhain, et al. Risk  
33 factors for morbidity after appendectomy. *Langenbeck's Arch Surg.* 2017;402(6):987-93.  
34  
35  
36
- 37  
38 14. Andersson R.E. Short-term complications and long-term morbidity of laparoscopic and  
39 open appendectomy in a national cohort. *Br J Surg.* 2014;101(9):1135-42.  
40  
41  
42
- 43  
44 15. Aranda-Narváez J.M., A.J., González-Sánchez, N., Marín-Camero, C., Montiel-Casado, P.,  
45 López-Ruiz, B., Sánchez-Pérez, et al. Conservative approach versus urgent appendectomy  
46 in surgical management of acute appendicitis with abscess or phlegmon. *Resultados del*  
47 *tratamiento conservador inicial y de la cirugía urgente en la apendicitis aguda evolucionada.*  
48 2010;102(11):648-52.  
49  
50  
51
- 52  
53  
54 16. Aranda-Narváez J.M., T., Prieto-Puga Arjona, B., García-Albiach, M.C., Montiel-Casado,  
55 A.J., González-Sánchez, B., Sánchez-Pérez, et al. Postappendectomy surgical site infection:  
56 Overall rate and type according to open/laparoscopic approach. *Infección de sitio quirúrgico*  
57  
58  
59  
60

- 1  
2  
3 tras apendicectomía urgente: tasa global y tipo según la vía de abordaje  
4 (abierta/laparoscópica). 2014;32(2):76-81.  
5  
6  
7  
8
- 9 17. Arthur T., R., Gartrell, B., Manoharan, D., Parker. Emergency appendectomy in Australia:  
10 findings from a multicentre, prospective study. ANZ J Surg. 2017;87(9):656-60.  
11  
12  
13
- 14 18. Asefa Z. Acute appendicitis in Yirgalem Hospital, southern Ethiopia. Ethiop Med J.  
15 2002;40(2):155-62.  
16  
17
- 18 19. Assefa Z., A., G/yesuse. Acute appendicitis in children admitted to zewditu memorial  
19 hospital. Ethiop Med J. 2014;52(4):189-95.  
20  
21  
22
- 23 20. Atif M.L., F., Sadaoui, A., Bezzaoucha, C.A., BezzaouchaKaddache, R., Boukari, S.,  
24 Djelato, et al. Intra-abdominal abscesses and laparoscopic versus open appendectomies.  
25 Infect Control Hosp Epidemiol. 2009;30(7):713-5  
26  
27  
28  
29
- 30 21. Bae E., A., Dehal, V., Franz, M., Joannides, N., Sakis, J., Scurlock, et al. Postoperative  
31 antibiotic use and the incidence of intra-abdominal abscess in the setting of suppurative  
32 appendicitis: a retrospective analysis. Am J Surg.2016;212(6):1121-5.  
33  
34  
35  
36  
37  
38  
39
- 40 22. Bae S.U., W.K., Jeong, S.K., Baek. Single-port laparoscopic interval appendectomy for  
41 perforated appendicitis with a periappendiceal abscess. Ann Coloproctol. 2016;32(3):105-  
42 10.  
43  
44  
45  
46  
47
- 48 23. Baek H.N., Y.H., Jung, Y.H., Hwang. Laparoscopic versus open appendectomy for  
49 appendicitis in elderly patients. J Korean Soc Coloproctology. 2011;27(5):241-5.  
50  
51  
52
- 53 24. Bali İ., F., Karateke, S., Özyazıcı, A., Kuvvetli, C., Oruç, E., Menekşe, et al. Comparison  
54 of intracorporeal knotting and endoloop for stump closure in laparoscopic appendectomy.  
55 Laparoskopik appendektomide intrakorporal düğüm ve endoloop ile güdük kapama  
56 yöntemlerinin karşılaştırılması. 2015;21(6):446-9.  
57  
58  
59  
60

- 1  
2  
3  
4  
5 25. Bhangu A., Richardson, C., Torrance, A., Pinkney, T., Collaborative, Natl Surg Res.  
6 Multicentre observational study of performance variation in provision and outcome of  
7 emergency appendicectomy. *British Journal Of Surgery*. 2013;100(9):1240-52.  
8  
9  
10  
11  
12 26. Bansal V., S., Altermatt, D., Nadal, C., Berger. Lack of benefit of preoperative antimicrobial  
13 prophylaxis in children with acute appendicitis: A prospective cohort study. *Infection*.  
14 2012;40(6):635-41.  
15  
16  
17  
18  
19  
20 27. Batajoo H., N.K., Hazra. Laparoscopic versus open appendectomy in acute appendicitis. *J*  
21 *Nepal Health Res Counc*. 2012;10(22):239-42.  
22  
23  
24  
25  
26 28. Saranga Bharathi R., V., Sharma, A., Chakladar, P., Kumari. Port exteriorisation  
27 appendectomy-our experience. *Med J Armed Forces India*. 2011;67(2):147-51.  
28  
29  
30  
31  
32 29. Biçakci U., B., Tander, M., Günaydin, R., Rizalar, E., Aritürk, S.H., Ayyildiz, et al. The  
33 comparison of open and laparoscopic appendectomy: Is there any outcome difference  
34 between non-complicated and complicated appendicitis? *Balkan Med J*. 2011;28(3):304-6.  
35  
36  
37  
38  
39 30. Bickel A., M., Gurevits, R., Vamos, S., Ivry, A., Eitan. Perioperative hyperoxygenation and  
40 wound site infection following surgery for acute appendicitis : A randomized, prospective,  
41 controlled trial. *Arch Surg*. 2011;146(4):464-70.  
42  
43  
44  
45  
46 31. Blackwood B.P., C.D., Gause, J.C., Harris, C.M., Theodorou, I., Helenowski, T.B., Lautz,  
47 et al. Overweight and obese pediatric patients have an increased risk of developing a  
48 surgical site infection. *Surg Infect*. 2017;18(4):491-7.  
49  
50  
51  
52  
53  
54 32. Blakely M.L., R., Williams, M.S., Dassinger, J.W., Eubanks III, P., Fischer, E.Y., Huang,  
55 et al. Early vs interval appendectomy for children with perforated appendicitis. *Arch Surg*.  
56 2011;146(6):660-5.  
57  
58  
59  
60

- 1  
2  
3 33. Bonadio W., K., Rebillot, O., Ukwuoma, C., Saracino, A., Iskhakov. Management of  
4 Pediatric Perforated Appendicitis: Comparing Outcomes Using Early Appendectomy  
5 versus Solely Medical Management. *Pediatr Infect Dis J.* 2017;36(10):937-41.  
6  
7  
8  
9  
10  
11 34. Boomer L.A., J.N., Cooper, K.J., Deans, P.C., Minneci, K., Leonhart, K.A., Diefenbach, et  
12 al. Does delay in appendectomy affect surgical site infection in children with appendicitis?  
13 *J Pediatr Surg.* 2014;49(6):1026-9.  
14  
15  
16  
17  
18 35. Boomer L.A., J.N., Cooper, S., Anandalwar, S.C., Fallon, D., Ostlie, C.M., Leys, et al.  
19 Delaying appendectomy does not lead to higher rates of surgical site infections. *Ann Surg.*  
20 2016;264(1):164-8.  
21  
22  
23  
24  
25  
26 36. Bozkurt M.A., M.G., Ünsal, S., Kapan, B., Kankaya, M.U., Kalaycii, H., Aliiş. Two  
27 different methods for appendiceal stump closure: Metal clip and Hem-o-lok clip. *J*  
28 *Laparoendosc Adv Surg Techn.* 2014;24(8):571-3.  
29  
30  
31  
32  
33 37. Brandt C., U., Hott, D., Sohr, F., Daschner, P., Gastmeier, H., Rüden. Operating room  
34 ventilation with laminar airflow shows no protective effect on the surgical site infection rate  
35 in orthopedic and abdominal surgery. *Ann Surg.* 2008;248(5):695-700.  
36  
37  
38  
39  
40  
41 38. Cairo S.B., M.V., Raval, M., Browne, H., Meyers, D.H., Rothstein. Association of same-  
42 day discharge with hospital readmission after appendectomy in pediatric patients. *JAMA*  
43 *Surg.* 2017;152(12):1106-12.  
44  
45  
46  
47  
48 39. Cameron D.B., P., Melvin, D.A., Graham, C.C., Glass, S.K., Serres, M.P., Kronman, et al.  
49 Extended Versus Narrow-spectrum Antibiotics in the Management of Uncomplicated  
50 Appendicitis in Children: A Propensity-matched Comparative Effectiveness Study. *Ann*  
51 *Surg.* 2017.  
52  
53  
54  
55  
56  
57 40. Cao J.-G., F., Tao, X.-J., Zhou, X.-G., Wang, S.-S., Wang, H., Zhang, et al. Trends and  
58 outcomes of laparoscopic appendectomy in China: A multicenter, retrospective cohort  
59  
60

- 1  
2  
3 study. *Surg Pract.* 2015;19(4):166-72.  
4  
5  
6  
7  
8 41. Cervantes-Sánchez C.R., R., Gutiérrez-Vega, J.A., Vázquez-Carpizo, P., Clark, C., Athié-  
9 Gutiérrez. Syringe pressure irrigation of subdermic tissue after appendectomy to decrease  
10 the incidence of postoperative wound infection. *World J Surg.* 2000;24(1):38-42.  
11  
12  
13  
14  
15 42. Chamisa I. A clinicopathological review of 324 appendices removed for acute appendicitis  
16 in Durban, South Africa: a retrospective analysis. *Ann R Coll Surg Engl.* 2009;91(8):688-  
17 92.  
18  
19  
20  
21  
22 43. Chaudhary I.A., Samiullah, A.A., Mallhi, Z., Afridi, A., Bano. Is it necessary to invaginate  
23 the stump after appendectomy? *Pak J Med Sci.* 2005;21(1):35-8.  
24  
25  
26  
27  
28 44. Chen D., H., Shi, H., Dong, K., Liu, K., Ding. Gasless single-incision laparoscopic  
29 appendectomy. *Surg Endosc Interv Tech.* 2011;25(5):1472-6.  
30  
31  
32  
33  
34 45. Chen C.-Y., Y.-C., Chen, H.-N., Pu, C.-H., Tsai, W.-T., Chen, C.-H., Lin. Bacteriology of  
35 acute appendicitis and its implication for the use of prophylactic antibiotics. *Surg Infect.*  
36 2012;13(6):383-90.  
37  
38  
39  
40  
41 46. Chen C.-C., C.-T., Ting, M.-J., Tsai, W.-C., Hsu, P.-C., Chen, M.-D., Lee, et al.  
42 Appendectomy timing: Will delayed surgery increase the complications? *J Chin Med*  
43 *Assoc.* 2015;78(7):395-9.  
44  
45  
46  
47  
48 47. Chiang R.-A., S.-L., Chen, Y.-C., Tsai, M.-J., Bair. Comparison of primary wound closure  
49 versus open wound management in perforated appendicitis. *J Formos Med Assoc.*  
50 2006;105(10):791-5.  
51  
52  
53  
54  
55  
56 48. Chiang R.-A., S.-L., Chen, Y.-C., Tsai. Delayed primary closure versus primary closure for  
57 wound management in perforated appendicitis: A prospective randomized controlled trial.  
58 *J Chin Med Assoc.* 2012;75(4):156-9.  
59  
60

- 1  
2  
3  
4  
5  
6 49. Cho M., J., Kang, I.-K., Kim, K.Y., Lee, S.-K., Sohn. Underweight body mass index as a  
7 predictive factor for surgical site infections after laparoscopic appendectomy. *Yonsei Med*  
8 *J.* 2014;55(6):1611-6.  
9  
10  
11  
12  
13 50. Choudhary S.K., S.K., Dhakaita. Appendicular mass-early appendicectomy vs interval  
14 appendicectomy. *Intl J Pharma Bio Sci.* 2014;5(1):B400-B4.  
15  
16  
17  
18  
19 51. Clyde C., T., Bax, A., Merg, M., MacFarlane, P., Lin, S., Beyersdorf, et al. Timing of  
20 intervention does not affect outcome in acute appendicitis in a large community practice.  
21 *Am J Surg.* 2008;195(5):590-3.  
22  
23  
24  
25  
26 52. Coakley B.A., E.S., Sussman, T.S., Wolfson, A.S., Bhagavath, J.J., Choi, N.E., Ranasinghe,  
27 et al. Postoperative antibiotics correlate with worse outcomes after appendectomy for  
28 nonperforated appendicitis. *J Am Coll Surg.* 2011;213(6):778-83.  
29  
30  
31  
32  
33  
34 53. Crandall M., M.B., Shapiro, M., Worley, M.A., West. Acute uncomplicated appendicitis:  
35 case time of day influences hospital length of stay. *Surg Infect (Larchmt).* 2009;10(1):65-  
36 9.  
37  
38  
39  
40  
41  
42 54. Dede K., T., Mersich, A., Zaránd, I., Besznyák, Z., Baranyai, B., Atkári, et al. Laparoscopic  
43 or open appendectomy? *Laparoszkópos vagy nyílt appendectomia?* 2008;149(50):2357-61.  
44  
45  
46  
47  
48 55. Dhiman N., A., Chi, T.M., Pawlik, D.T., Efron, E.R., Haut, E.B., Schneider, et al. Increased  
49 complications after appendectomy in patients with cerebral palsy: Are special needs patients  
50 at risk for disparities in outcomes? *Surgery.* 2013;154(3):479-85.  
51  
52  
53  
54  
55 56. Dimitriou I., B., Reckmann, O., Nephuth, M., Betzler. Single institution's experience in  
56 laparoscopic appendectomy as a suitable therapy for complicated appendicitis.  
57 *Langenbeck's Arch Surg.* 2013;398(1):147-52.  
58  
59  
60



- 1  
2  
3 57. Durkin M.J., K.V., Dicks, A.W., Baker, S.S., Lewis, R.W., Moehring, L.F., Chen, et al.  
4 Seasonal variation of common surgical site infections: Does season matter? *Infect Control*  
5 *Hosp Epidemiol.* 2015;36(9):1011-6.  
6  
7  
8  
9  
10  
11 58. Ein S.H., A., Nasr, A., Ein. Open appendectomy for pediatric ruptured appendicitis: a  
12 historical clinical review of the prophylaxis of wound infection and postoperative intra-  
13 abdominal abscess. *Can J Surg.* 2013;56(3):E7-E12.  
14  
15  
16  
17  
18 59. Fukuda H. Patient-related risk factors for surgical site infection following eight types of  
19 gastrointestinal surgery. *J Hosp Infect.* 2016;93(4):347-54.  
20  
21  
22  
23  
24 60. Gandaglia G., K.R., Ghani, A., Sood, J.R., Meyers, J.D., Sammon, M., Schmid, et al. Effect  
25 of minimally invasive surgery on the risk for surgical site infections results from the national  
26 surgical quality improvement program (nsqip) database. *JAMA Surg.* 2014;149(10):1039-  
27 44.  
28  
29  
30  
31  
32  
33 61. Garcell H.G., A.V., Arias, C.A., Pancorbo Sandoval, E.G., García, M.E., Valle Gamboa,  
34 A.B., Sado, et al. Incidence and etiology of surgical site infections in appendectomies: A 3-  
35 year prospective study. *Oman Med J.* 2017;32(1):31-5.  
36  
37  
38  
39  
40  
41 62. Ghnnam W.M. Elderly versus young patients with appendicitis 3 years experience. *Alex J*  
42 *Med.* 2012;48(1):9-12.  
43  
44  
45  
46  
47 63. Giesen L.J., A.L., van den Boom, C.C., van Rossem, P.T., den Hoed, B.P., Wijnhoven.  
48 Retrospective Multicenter Study on Risk Factors for Surgical Site Infections after  
49 Appendectomy for Acute Appendicitis. *Dig Surg.* 2017;34(2):103-7.  
50  
51  
52  
53  
54  
55 64. Giiti G.C., H.D., Mazigo, J., Heukelbach, W., Mahalu. HIV, appendectomy and  
56 postoperative complications at a reference hospital in Northwest Tanzania: Cross-sectional  
57 study. *AIDS Res Ther.* 2010;7.  
58  
59  
60

- 1  
2  
3 65. Golub A.V., R.S., Kozlov, V.G., Pleshkov, A.P., Moskalev, R.A., Alibegov, M.A.,  
4 Chelombitko. Surgical Site Infections after Open Appendectomy and Effectiveness of  
5 Complex Approach to Their Prevention. *Khirurgiia (Mosk)*. 2016(6):68-76.  
6  
7  
8  
9  
10  
11 66. Gross T.S., C., McCracken, K.F., Heiss, M.L., Wulkan, M.V., Raval. The contribution of  
12 practice variation to length of stay for children with perforated appendicitis. *J Pediatr Surg*.  
13 2016;51(8):1292-7.  
14  
15  
16  
17  
18 67. Gurien L.A., D.L., Wyrick, S.D., Smith, M.S., Dassinger. Optimal timing of appendectomy  
19 in the pediatric population. *J Surg Res*. 2016;202(1):126-31.  
20  
21  
22  
23  
24 68. Hamzaoglu I, B., Baca, D.E., Böler, E., Polat, Y., Özer. Is umbilical flora responsible for  
25 wound infection after laparoscopic surgery? *Surg Laparoscopy Endosc Percutaneous Tech*.  
26 2004;14(5):263-7.  
27  
28  
29  
30  
31  
32 69. Harmon L.A., M.L., Davis, D.C., Jupiter, R.C., Frazee, J.L., Regner. Computed tomography  
33 to operating room in less than 3 hours minimizes complications from appendicitis. *Am J*  
34 *Surg*. 2016;212(2):246-50.  
35  
36  
37  
38  
39 70. Helling T.S., D.F., Soltys, S., Seals. Operative versus non-operative management in the care  
40 of patients with complicated appendicitis. *Am J Surg*. 2017;214(6):1195-200.  
41  
42  
43  
44  
45 71. Helmer K.S., E.K., Robinson, K.P., Lally, J.C., Vasquez, K.L., Kwong, T.H., Liu, et al.  
46 Standardized patient care guidelines reduce infectious morbidity in appendectomy patients.  
47 *Am J Surg*. 2002;183(6):608-13.  
48  
49  
50  
51  
52 72. Hesami M.A., H., Alipour, H., Nikoupour Daylami, B., Alipour, S., Bazargan-Hejazi, A.,  
53 Ahmadi. Irrigation of abdomen with imipenem solution decreases surgical site infections in  
54 patients with perforated appendicitis: A randomized clinical trial. *Iran Red Crescent MedJ*.  
55 2014;16(4).  
56  
57  
58  
59  
60

- 1  
2  
3 73. Horvath P., J., Lange, R., Bachmann, F., Struller, A., Königsrainer, M., Zdichavsky.  
4 Comparison of clinical outcome of laparoscopic versus open appendectomy for complicated  
5 appendicitis. *Surg Endosc Interv Tech.* 2017;31(1):199-205.  
6  
7  
8  
9  
10  
11 74. Hughes M.J., E., Harrison, S., Paterson-Brown. Post-operative antibiotics after  
12 appendectomy and post-operative abscess development: A retrospective analysis. *Surg*  
13 *Infect.* 2013;14(1):56-61.  
14  
15  
16  
17 75. Hussain M.I., M.K., Alam, H.H., Al-Qahatani, M.H., Al-Akeely. Role of postoperative  
18 antibiotics after appendectomy in non-perforated appendicitis. *J Coll Phys Surg Pak.*  
19 2012;22(12):756-9.  
20  
21  
22  
23  
24  
25  
26 76. Iqbal M., M., Jawaid, A., Qureshi, S., Iqbal. Effect of povidone-iodine irrigation on post  
27 appendectomy wound infection: Randomized control trial. *J Postgrad Med Inst.*  
28 2015;29(3):160-4.  
29  
30  
31  
32  
33 77. Iñigo J.J., B., Bermejo, B., Oronoz, J., Herrera, A., Tarifa, F., Pérez, et al. Surgical site  
34 infection in general surgery: 5-year analysis and assessment of the National Nosocomial  
35 Infection Surveillance (NNIS) index. *Infección de sitio quirúrgico en un servicio de cirugía*  
36 *general Análisis de cinco años y valoración del índice National Nosocomial Infection*  
37 *Surveillance (NNIS).* 2006;79(4):224-30.  
38  
39  
40  
41  
42  
43  
44 78. Javadi S.M.R., S.Y., Zarghami, P., Ghaderzadeh, M., Ghorbanpoor, H.R., Makarchian, A.,  
45 Derakhshanfar, et al. Comparison of small access and classic McBurney's incisions for open  
46 appendectomy: A randomized controlled trial. *Shiraz E Med J.* 2017;18(10).  
47  
48  
49  
50  
51 79. Jenkins P.C., M.K., Oerline, A.J., Mullard, M.J., Englesbe, D.A., Campbell, M.R.,  
52 Hemmila. Hospital variation in outcomes following appendectomy in a regional quality  
53 improvement program. *Am J Surg.* 2016;212(5):857-62.  
54  
55  
56  
57  
58  
59 80. Kang J., B.N., Bae, G., Gwak, I., Park, H., Cho, K., Yang, et al. Comparative study of a  
60

1  
2  
3 single-incision laparoscopic and a conventional laparoscopic appendectomy for the  
4 treatment of acute appendicitis. *J Korean Soc Coloproctology*. 2012;28(6):304-8.  
5  
6  
7  
8

- 9 81. Kapischke M., A., Pries, A., Caliebe. Short term and long term results after open vs.  
10 Laparoscopic appendectomy in childhood and adolescence: A subgroup analysis. *BMC*  
11 *Pediatr*. 2013;13(1).  
12  
13  
14  
15  
16 82. Karam P.A., A., Hiuser, D., Magnuson, F.G.F., Seifarth. Intracorporeal hybrid single port  
17 vs conventional laparoscopic appendectomy in children. *Pediatr Med Chir*. 2016;38(3):89-  
18 92.  
19  
20  
21  
22  
23  
24 83. Karam P.A., A., Mohan, M.R., Buta, F.G., Seifarth. Comparison of Transumbilical  
25 Laparoscopically Assisted Appendectomy to Conventional Laparoscopic Appendectomy in  
26 Children. *Surg Laparoscopy Endosc Percutaneous Tech*. 2016;26(6):508-12.  
27  
28  
29  
30  
31 84. Kasatpibal N., S., Jamulitrat, V., Chongsuvivatwong. Standardized incidence rates of  
32 surgical site infection: A multicenter study in Thailand. *Am J Infect Control*.  
33 2005;33(10):587-94.  
34  
35  
36  
37  
38  
39 85. Kasatpibal N., M., Nørgaard, H.T., Sørensen, H.C., Schönheyder, S., Jamulitrat, V.,  
40 Chongsuvivatwong. Risk of surgical site infection and efficacy of antibiotic prophylaxis: A  
41 cohort study of appendectomy patients in Thailand. *BMC Infect Dis*. 2006;6.  
42  
43  
44  
45  
46 86. Kato Y., T., Marusasa, S., Ichikawa, G.J., Lane, T., Okazaki, A., Yamataka. Lapprotector  
47 use decreases incisional wound infections in cases of perforated appendicitis: a prospective  
48 study. *Asian J Surg*. 2008;31(3):101-3.  
49  
50  
51  
52  
53  
54 87. Kell M.R., K., Power, D.C., Winter, C., Power, C., Shields, W.O., Kirwan, et al. Predicting  
55 outcome after appendectomy. *Ir J Med Sci*. 2003;172(2):63-5.  
56  
57  
58  
59 88. Khan M.N., T., Fayyad, T.D., Cecil, B.J., Moran. Laparoscopic versus open appendectomy:  
60

- 1  
2  
3 the risk of postoperative infectious complications. *JLS*. 2007;11(3):363-7.  
4  
5  
6  
7  
8 89. Khan K.I., S., Mahmood, M., Akmal, A., Waqas. Comparison of rate of surgical wound  
9 infection, length of hospital stay and patient convenience in complicated appendicitis  
10 between primary closure and delayed primary closure. *J Pak Med Assoc*. 2012;62(8):596-  
11 8.  
12  
13  
14  
15  
16 90. Khan I., M.I., Khan, M., Jawed, U., Shaikh, S., Ahmed, A., Arif. To compare the frequency  
17 of superficial surgical site infection after laparoscopic versus open appendectomy. *Med*  
18 *Forum Monthly*. 2014;25(11):52-5.  
19  
20  
21  
22  
23  
24 91. Khiria L.S., R., Ardhnari, N., Mohan, P., Kumar, R., Nambiar. Laparoscopic  
25 appendectomy for complicated appendicitis: Is it safe and justified? A retrospective  
26 analysis. *Surg Laparoscopy Endosc Percutaneous Tech*. 2011;21(3):142-5.  
27  
28  
29  
30  
31 92. Kılıç Ş.S., S., Ekinçi, İ., Karnak, A.Ö., Çiftçi, F.C., Tanyel, M.E., Şenocak. Drainage  
32 systems' effect on surgical site infection in children with perforated appendicitis. *Drenaj*  
33 *Sistemlerinin perforé apandisitli çocuklarda cerrahi alan enfeksiyonuna etkisi*.  
34 2016;7(5):591-4.  
35  
36  
37  
38  
39  
40 93. Kim M.J., F.J., Fleming, D.D., Gunzler, S., Messing, R.M., Salloum, J.R.T., Monson.  
41 Laparoscopic appendectomy is safe and efficacious for the elderly: An analysis using the  
42 National Surgical Quality Improvement Project database. *Surg Endosc Interv Tech*.  
43 2011;25(6):1802-7.  
44  
45  
46  
47  
48  
49 94. Kim J.H., H.Y., Kim, S.K., Park, J.S., Lee, D.S., Heo, S.W., Park, et al. Single-incision  
50 laparoscopic appendectomy versus conventional laparoscopic appendectomy: Experiences  
51 from 1208 cases of single-incision laparoscopic appendectomy. *Ann Surg*.  
52 2015;262(6):1054-8.  
53  
54  
55  
56  
57  
58 95. Kim J.K., J., Kang, W.R., Kim, E.J., Park, S.H., Baik, K.Y., Lee. Does Conversion  
59  
60

- 1  
2  
3 Adversely Impact the Clinical Outcomes for Patients with Complicated Appendicitis? J  
4 Laparoendosc Adv Surg Techn. 2016;26(8):635-40.  
5  
6  
7  
8  
9 96. Kiriakopoulos A., D., Tsakayannis, D., Linos. Laparoscopic management of complicated  
10 appendicitis. JSLS. 2006;10(4):453-6.  
11  
12  
13  
14  
15 97. Kirshtein B., Z.H., Perry, S., Mizrahi, L., Lantsberg. Value of laparoscopic appendectomy  
16 in the elderly patient. World J Surg. 2009;33(5):918-22.  
17  
18  
19  
20  
21 98. Kiudelis M., P., Ignatavicius, K., Zviniene, S., Grizas. Analysis of intracorporeal knotting  
22 with invaginating suture versus endoloops in appendiceal stump closure. Wideochir Inne  
23 Tech Ma?oinwazyjne. 2013;8(1):69-73.  
24  
25  
26  
27  
28 99. Kleif J., L., Rasmussen, S., Fonnes, P., Tibæk, A., Daoud, H., Lund, et al. Enteral  
29 Antibiotics are Non-inferior to Intravenous Antibiotics After Complicated Appendicitis in  
30 Adults: A Retrospective Multicentre Non-inferiority Study. World J Surg.  
31 2017;41(11):2706-14.  
32  
33  
34  
35  
36  
37  
38 100. Koizumi N., H., Kobayashi, Y., Nakase, T., Takagi, K., Fukumoto. Efficacy of  
39 transumbilical laparoscopic-assisted appendectomy for appendicitis: a four-year experience  
40 at a single center. Surg Today. 2015;45(10):1245-9.  
41  
42  
43  
44  
45 101. Shimizu T., M., Ishizuka, K., Kubota. The preoperative serum C-reactive protein level  
46 is a useful predictor of surgical site infections in patients undergoing appendectomy. Surg  
47 Today. 2015;45(11):1404-10.  
48  
49  
50  
51  
52  
53 102. Kumamoto K., H., Imaizumi, N., Hokama, T., Ishiguro, K., Ishibashi, K., Baba, et al.  
54 Recent trend of acute appendicitis during pregnancy. Surg Today. 2015;45(12):1521-6.  
55  
56  
57  
58 103. Kumar B., A., Samad, T.W., Khanzada, M.H., Laghari, A.R., Shaikh. Superiority of  
59 laparoscopic appendectomy over open appendectomy: The Hyderabad experience. Rawal  
60

- 1  
2  
3 Med J. 2008;33(2):165-8.  
4  
5  
6  
7  
8 104. Kumar S., A., Jalan, B.N., Patowary, S., Shrestha. Laparoscopic appendectomy versus  
9 open appendectomy for acute appendicitis: A prospective comparative study. Kathmandu  
10 Univ Med J. 2016;14(55):244-8.  
11  
12  
13  
14  
15 105. Lacher M., O.J., Muensterer, G.R., Yannam, C.J., Aprahamian, L., Perger, M., Megison,  
16 et al. Feasibility of single-incision pediatric endosurgery for treatment of appendicitis in  
17 415 children. J Laparoendosc Adv Surg Techn. 2012;22(6):604-8.  
18  
19  
20  
21  
22 106. Lasses-Martínez B., E., Ortiz-Oshiro, J.L., Cabañas-Ojeda, P., Benito-Expósito, C.,  
23 Fernández-Pérez, J., Alvarez Fernández-Represa. Cost is not a drawback to perform  
24 laparoscopic appendectomy in an academic hospital. Surg Laparoscopy Endosc  
25 Percutaneous Tech. 2014;24(4):e123-e7.  
26  
27  
28  
29  
30  
31  
32 107. Le D., W., Rusin, B., Hill, J., Langell. Post-operative antibiotic use in nonperforated  
33 appendicitis. Am J Surg.2009;198(6):748-52.  
34  
35  
36  
37  
38  
39 108. Lee P., K., Waxman, B., Taylor, S., Yim. Use of wound-protection system and  
40 postoperative wound-infection rates in open appendectomy: A randomized prospective  
41 trial. Arch Surg. 2009;144(9):872-5.  
42  
43  
44  
45  
46 109. Lee S.L., S., Shekherdimian, V.Y., Chiu. Comparison of pediatric appendicitis  
47 outcomes between teaching and nonteaching hospitals. J Pediatr Surg. 2010;45(5):894-7.  
48  
49  
50  
51 110. Lee J.A., K.Y., Sung, J.H., Lee, D.S., Lee. Laparoscopic appendectomy with a single  
52 incision in a single institute. J Korean Soc Coloproctology. 2010;26(4):260-4.  
53  
54  
55  
56  
57 111. Lee S.-Y., H.-M., Lee, C.-S., Hsieh, J.-H., Chuang. Transumbilical laparoscopic  
58 appendectomy for acute appendicitis: A reliable one-port procedure. Surg Endosc Interv  
59  
60

- 1  
2  
3 Tech. 2011;25(4):1115-20.  
4  
5  
6  
7 112. Lee S.L., A., Yaghoubian, A., Kaji. Laparoscopic vs open appendectomy in children:  
8 Outcomes comparison based on age, sex, and perforation status. Arch Surg.  
9 2011;146(10):1118-21.  
10  
11  
12  
13  
14  
15 113. Lee S.M., G.S., Hwang, D.S., Lee. Single-incision laparoscopic appendectomy using  
16 homemade glove port at low cost. J Minimal Access Surg. 2016;12(2):124-8.  
17  
18  
19  
20  
21 114. Levy S.M., G., Holzmann-Pazgal, K.P., Lally, K., Davis, L.S., Kao, K., Tsao. Quality  
22 check of a quality measure: Surgical wound classification discrepancies impact risk-  
23 stratified surgical site infection rates in pediatric appendicitis. J Am Coll Surg.  
24 2013;217(6):969-73.  
25  
26  
27  
28  
29  
30 115. Li P., Q., Xu, Z., Ji, Y., Gao, X., Zhang, Y., Duan, et al. Comparison of surgical stress  
31 between laparoscopic and open appendectomy in children. J Pediatr Surg. 2005;40(8):1279-  
32 83.  
33  
34  
35  
36  
37  
38  
39 116. Lim S.G., E.J., Ahn, S.Y., Kim, I.Y., Chung, J.-M., Park, S.H., Park, et al. A clinical  
40 comparison of laparoscopic versus open appendectomy for complicated appendicitis. J  
41 Korean Soc Coloproctology. 2011;27(6):293-7.  
42  
43  
44  
45  
46 117. Geraldo José de Souza Lima, Silva, Alcino Lázaro da, Castro, Eduardo Godoy, Abras,  
47 Gustavo Munayer, Pires, Lívio José Suretti, Leite, Rodrigo Fabiano Guedes. Efetividade e  
48 segurança da apendicectomia videoassistida em porta única transumbilical em adolescentes  
49 e adultos X1 Effectiveness and safeness of single-port trans-umbilical laparoscopic  
50 appendectomy done in adolescents and adults. Revista do Colégio Brasileiro de Cirurgiões.  
51 2008;35(4):244-51.  
52  
53  
54  
55  
56  
57  
58  
59 118. Lin H.-F., J.-M., Wu, L.-M., Tseng, K.-H., Chen, S.-H., Huang, I.-R., Lai. Laparoscopic  
60



- 1  
2  
3 Versus Open Appendectomy for Perforated Appendicitis. *J Gastrointest Surg.*  
4 2006;10(6):906-10.  
5  
6  
7  
8  
9 119. Litz C.N., S.M., Farach, P.D., Danielson, N.M., Chandler. Obesity and single-incision  
10 laparoscopic appendectomy in children. *J Surg Res.* 2016;203(2):283-6.  
11  
12  
13  
14 120. Liu C., W., Wang, Y., Sun, M., Xu, H., Zhuang, H., Chen, et al. Efficacy and  
15 complications of laparoscopic appendectomy for pediatric appendicitis. *Int J Clin Exp Med.*  
16 2017;10(9):13784-9.  
17  
18  
19  
20  
21  
22 121. Mahmood M.M., A., Shahab, M.A., Razzaq. Surgical site infection in open versus  
23 laparoscopic appendectomy. *Pak J Med Health Sci.* 2016;10(3):1076-8.  
24  
25  
26  
27  
28 122. Mbah N., W.Ek., Opara, N.P., Agwu. Waiting time among acute abdominal  
29 emergencies in a Nigerian teaching hospital: Causes of delay and consequences. *Niger J*  
30 *Surg Res.* 2006;8(1):69-73.  
31  
32  
33  
34  
35  
36 123. Memon G.A., A.I., Memon, S.K.A., Shah, R.A., Sahito, Habib-Ur-Rehman, S., Leghari,  
37 et al. An experience of treatment outcome in acute appendicitis with antibiotics and  
38 appendectomy at a tertiary care hospital. *Med Forum Monthly.* 2017;28(3):136-40.  
39  
40  
41  
42  
43 124. Menezes M., L., Das, M., Alagtal, J., Haroun, P., Puri. Laparoscopic appendectomy is  
44 recommended for the treatment of complicated appendicitis in children. *Pediatr Surg Int.*  
45 2008;24(3):303-5.  
46  
47  
48  
49  
50 125. Merenda M., A., Litarski, P., Kabziński, D., Janczak. Laparoscopic appendectomy as an  
51 alternative to conventional procedure - results in our own material. *Pol Przegl Chir.*  
52 2013;85(6):323-8.  
53  
54  
55  
56  
57  
58 126. Michailidou M., M.G., Sacco Casamassima, S.D., Goldstein, C., Gause, O., Karim, J.H.,  
59 Salazar, et al. The impact of obesity on laparoscopic appendectomy: Results from the ACS  
60

- 1  
2  
3 National Surgical Quality Improvement Program pediatric database. *J Pediatr Surg.*  
4 2015;50(11):1880-4.  
5  
6  
7  
8  
9 127. Michailidou M., S.D., Goldstein, M.G., Sacco Casamassima, J.H., Salazar, R., Elliott,  
10 J., Hundt, et al. Laparoscopic versus open appendectomy in children: The effect of surgical  
11 technique on healthcare costs. *Am J Surg.* 2015;210(2):270-5.  
12  
13  
14  
15  
16 128. Mickovic I.N., Z., Golubovic, S., Mickovic, D., Vukovic, S., Trajkovic, S.S.,  
17 Antunovic, et al. A comparative analysis of laparoscopic appendectomy in relation to the  
18 open appendectomy in children. *Uporedna analiza laparoscopske apendektomije u odnosu*  
19 *na otvorenu apendektomiju kod dece.* 2016;17(1):49-53.  
20  
21  
22  
23  
24  
25  
26 129. Ming P.C., T.Y., Yee Yan, L.H., Tat. Risk factors of postoperative infections in adults  
27 with complicated appendicitis. *Surg Laparoscopy Endosc Percutaneous Tech.*  
28 2009;19(3):244-8.  
29  
30  
31  
32  
33 130. Mingmalairak C., P., Ungbhakorn, V., Paocharoen. Efficacy of antimicrobial coating  
34 suture coated polyglactin 910 with tricosan (Vicryl Plus) compared with polyglactin 910  
35 (Vicryl) in reduced surgical site infection of appendicitis, double blind randomized control  
36 trial, preliminary safety report. *J Med Assoc Thailand.* 2009;92(6):770-5.  
37  
38  
39  
40  
41  
42  
43 131. Miyano G., T., Okazaki, Y., Kato, T., Marusasa, T., Takahashi, G.J., Lane, et al. Open  
44 versus laparoscopic treatment for pan-peritonitis secondary to perforated appendicitis in  
45 children: A prospective analysis. *J Laparoendosc Adv Surg Techn.* 2010;20(7):655-7.  
46  
47  
48  
49  
50 132. Moazzez A., R.J., Mason, N., Katkhouda. Thirty-day outcomes of laparoscopic versus  
51 open appendectomy in elderly using ACS/NSQIP database. *Surg Endosc Interv Tech.*  
52 2013;27(4):1061-71.  
53  
54  
55  
56  
57 133. Mohammad Taghi Rajabi-Mashhadi, Mousavi, Seyed Hadi, Khosravi-Mashizi, M. H.,  
58 Ghayour-Mobarhan, Majid, Sahebkar, Amirhossein. Optimum duration of perioperative  
59  
60

- 1  
2  
3 antibiotic therapy in patients with acute non-perforated appendicitis: a prospective  
4 randomized trial. *Asian Biomedicine*. 2012;6(6):891-4.  
5  
6  
7
- 8  
9 134. Monge Jodra V., A., Robustillo Rodela, F., Martin Martinez, N., López Fresneña, S.,  
10 Oña Compán, F., Calbo Torrecillas, et al. Standardized infection ratios for three general  
11 surgery procedures: A comparison between Spanish hospitals and U.S. centers participating  
12 in the national nosocomial infections surveillance system. *Infect Control Hosp Epidemiol*.  
13 2003;24(10):744-8.  
14  
15  
16  
17  
18
- 19  
20 135. Mueck K.M., L.R., Putnam, K.T., Anderson, K.P., Lally, K., Tsao, L.S., Kao. Does  
21 compliance with antibiotic prophylaxis in pediatric simple appendicitis matter? *J Surg Res*.  
22 2017;216:1-8.  
23  
24  
25  
26  
27
- 28  
29 136. Muensterer O.J., C., Puga Nougues, O.O., Adibe, S.R., Amin, K.E., Georgeson, C.M.,  
30 Harmon. Appendectomy using single-incision pediatric endosurgery for acute and  
31 perforated appendicitis. *Surg Endosc Interv Tech*. 2010;24(12):3201-4.  
32  
33  
34  
35
- 36  
37 137. Muensterer O.J., R., Keijzer. A simple vacuum dressing reduces the wound infection  
38 rate of single-incision pediatric endosurgical appendectomy. *J Soc Laparoendoscopic Surg*.  
39 2011;15(2):147-50.  
40  
41  
42
- 43  
44 138. Mustafa M.I.T., S.M., Chaudhry, R.I.T., Mustafa. Comparison of early outcome  
45 between patients of open appendectomy with and without drain for perforated appendicitis.  
46 *Pak J Med Health Sci*. 2016;10(3):890-3.  
47  
48  
49
- 50  
51 139. Nadler E.P., K.K., Reblock, H.R., Ford, B.A., Gaines. Monotherapy versus multi-drug  
52 therapy for the treatment of perforated appendicitis in children. *Surg Infect*. 2003;4(4):327-  
53 33.  
54  
55  
56  
57
- 58  
59 140. Nataraja R.M., A., Bandi, S.A., Clarke, M.J., Haddad. Comparison of intra-abdominal  
60 abscess formation following laparoscopic and open appendectomy in children. *J*

- Laparoendosc Adv Surg Techn. 2010;20(4):391-4.
141. Nataraja R.M., W.J., Teague, J., Galea, L., Moore, M.J., Haddad, T., Tsang, et al. Comparison of intraabdominal abscess formation after laparoscopic and open appendectomies in children. *J Pediatr Surg.* 2012;47(2):317-21.
142. Norton Pérez, Romero, Marcela, Castelblanco, María Isabel, Rodríguez, Emma Isabel. Infección del sitio operatorio de apendicectomías en un hospital de la orinoquia colombiana X1 Surgical site infection following appendectomy at a hospital in the Colombian Orinoco river basin (Colombian Orinoquia). *Revista Colombiana de Cirugía.* 2009;24(1):23-30.
143. Obayashi J., K., Ohyama, S., Manabe, K., Tanaka, H., Nagae, H., Shima, et al. Are there reliable indicators predicting post-operative complications in acute appendicitis? *Pediatr Surg Int.* 2015;31(12):1189-93.
144. Obinwa O., C., Peirce, M., Cassidy, T., Fahey, J., Flynn. A model predicting perforation and complications in paediatric appendectomy. *Int J Colorectal Dis.* 2015;30(4):559-65.
145. Ohene-Yeboah M., B., Togbe. An audit of appendicitis and appendectomy in Kumasi, Ghana. *West Afr J Med.* 2006;25(2):138-43.
146. Okkyung Suh, 신완균, 강성희, 양대현. Appropriate Duration of Prophylactic Antibiotics in Acute Nonperforated Appendicitis Z1 급성 비천공성 충수염 수술시 예방적 항균제의 사용기간. *Korean Journal of Clinical Pharmacy S1 한국임상약학회지.* 2002;12(2):65-70.
147. Francisco Gabriel Onieva, Roldán, Sara, Domínguez, José Ramón, Montero, Juan Pedro, Galnares, Alfonso, Peralta, Jordi. Abordaje laparoscópico frente a enfoque clásico

- 1  
2  
3 en el tratamiento de la apendicitis aguda X1 Laparoscopic approach versus classic open  
4 procedure in the treatment of acute appendicitis. *Revista Colombiana de Cirugía*.  
5 2017;32(1):26-31.  
6  
7  
8  
9
- 10 148. Page A.J., J.D., Pollock, S., Perez, S.S., Davis, E., Lin, J.F., Sweeney. Laparoscopic  
11 Versus Open Appendectomy: An Analysis of Outcomes in 17,199 Patients Using  
12 ACS/NSQIP. *J Gastrointest Surg*. 2010;14(12):1955-62.  
13  
14  
15  
16
- 17 149. Palesty J.A., X.J., Wang, R.C., Rutland, J., Leighton, S.J., Dudrick, A., Benbrahim.  
18 Fifty-five consecutive laparoscopic appendectomy procedures without conversion. *JSL*.  
19 2004;8(2):141-5.  
20  
21  
22  
23  
24
- 25 150. Pandit R.K. Safe and feasible time limit for early appendectomy in appendiceal mass.  
26 *Kathmandu Univ Med J*. 2016;14(55):210-4.  
27  
28  
29  
30
- 31 151. Parcells J.P., J.P., Mileski, F.T., Gnagy, A.F., Haragan, W.J., Mileski. Using  
32 antimicrobial solution for irrigation in appendicitis to lower surgical site infection rates. *Am*  
33 *J Surg*. 2009;198(6):875-80.  
34  
35  
36  
37  
38  
39  
40
- 41 152. Park H.-C., M.J., Kim, B.H., Lee. Effect of a Standardized Protocol of Antibiotic  
42 Therapy on Surgical Site Infection after Laparoscopic Surgery for Complicated  
43 Appendicitis. *Surg Infect*. 2017;18(6):684-8.  
44  
45  
46  
47  
48
- 49 153. Seongmun Park, Park, Min-Su, Lee, Kil-Yeon. Relationship between the Hospital Visit-  
50 to-Operation Time Interval and the Risk of Appendiceal Perforation and Clinical Outcomes.  
51 *Journal of Minimally Invasive Surgery*. 2018;21(1):31-7.  
52  
53  
54
- 55 154. Reoyo Pascual J.F., R., León Miranda, C., Cartón Hernández, E., Alonso Alonso, R.M.,  
56 Martínez Castro, J., Sánchez Manuel. Laparoscopic appendectomy by 'glove port'  
57 system: Our first 100 cases. *Apendicectomía laparoscópica por sistema «glove port»:*  
58  
59  
60

- 1  
2  
3 nuestros primeros 100 casos. 2017;69(6):467-71.  
4  
5  
6  
7 155. Patrice Lemieux., Pascal Rheaume., Isabelle Levesque., Emmanuel Bujold., Gaetan  
8 Brochu. Laparoscopic appendectomy in pregnant patients: a review of 45 cases. Surg  
9 Endosc.2009; 23:1701.  
10  
11  
12  
13  
14 156. Patel S.C., G.F., Jumba, S., Akmal. Laparoscopic appendicectomy at the Aga Khan  
15 Hospital, Nairobi. East Afr Med J. 2003;80(9):447-51.  
16  
17  
18  
19  
20 157. Percy C., K., Almahmoud, T., Jackson, C., Hartline, A., Cahill, L., Spence, et al. Risky  
21 business? Investigating outcomes of patients undergoing urgent laparoscopic  
22 appendectomy on antithrombotic therapy. Am J Surg. 2017;214(6):1012-5.  
23  
24  
25  
26  
27 158. Pishori T., A.R., Siddiqui, M., Ahmed. Surgical wound infection surveillance in general  
28 surgery procedures at a teaching hospital in Pakistan. Am J Infect Control. 2003;31(5):296-  
29 301.  
30  
31  
32  
33  
34  
35 159. Putnam L.R., T.G., Ostovar-Kermani, A., Le Blanc, K.T., Anderson, G., Holzmann-  
36 Pazgal, K.P., Lally, et al. Surgical site infection reporting: more than meets the agar. J  
37 Pediatr Surg. 2017;52(1):156-60.  
38  
39  
40  
41  
42  
43 160. Al-Qahtani S.M., H.M., Al-Amoudi, S., Al-Jehani, A.S., Ashour, M.R., Abd-Hammad,  
44 O.R., Tawfik, et al. Post-appendectomy surgical site infection rate after using an  
45 antimicrobial film incise drape: A prospective study. Surg Infect. 2015;16(2):155-8.  
46  
47  
48  
49  
50 161. Quezada F., N., Quezada, R., Mejia, A., Brañes, O., Padilla, N., Jarufe, et al.  
51 Laparoscopic versus open approach in the management of appendicitis complicated  
52 exclusively with peritonitis: A single center experience. Int J Surg. 2015;13:80-3.  
53  
54  
55  
56  
57  
58 162. Raakow J., H.-G., Liesaus, P., Neuhaus, R., Raakow. Single-incision versus multiport  
59 laparoscopic appendectomy: a case-matched comparative analysis. Surg Endosc Interv  
60

- 1  
2  
3 Tech. 2015;29(6):1530-6.  
4  
5  
6  
7 163. Ríos J., C., Murillo, G., Carrasco, C., Humet. Increase in costs attributable to surgical  
8 infection after appendicectomy and colectomy. Incremento de costes atribuible a la  
9 infección quirúrgica de la apendicectomía y colectomía. 2003;17(3):218-25.  
10  
11  
12  
13  
14 164. Rafiq M.S., M.M., Khan, A., Khan, H., Jan. Evaluation of postoperative antibiotics after  
15 non-perforated appendectomy. J Pak Med Assoc. 2015;65(8):815-7.  
16  
17  
18  
19  
20  
21  
22 165. Reinisch A., J., Heil, G., Woeste, W., Bechstein, J., Liese. The meteorological influence  
23 on seasonal alterations in the course of acute appendicitis. J Surg Res. 2017;217:137-43.  
24  
25  
26  
27  
28 166. Romano A., P., Parikh, P., Byers, N., Namias. Simple acute appendicitis versus non-  
29 perforated gangrenous appendicitis: Is there a difference in the rate of post-operative  
30 infectious complications? Surg Infect. 2014;15(5):517-20.  
31  
32  
33  
34  
35  
36 167. Romel Hilaire, Fernández, Zenén Rodríguez, García, Lázaro Ibrahim Romero, Sánchez,  
37 Luis Pablo Rodríguez. Apendicectomía videolaparoscópica frente a apendicectomía  
38 convencional X1 Laparoscopic versus conventional appendectomy. Revista Cubana de  
39 Cirugía. 2014;53(1):30-40.  
40  
41  
42  
43  
44  
45 168. Romy S., M.-C., Eisenring, V., Bettschart, C., Petignat, P., Francioli, N., Troillet.  
46 Laparoscope use and surgical site infections in digestive surgery. Ann Surg.  
47 2008;247(4):627-32.  
48  
49  
50  
51  
52  
53 169. Rooh-ul-Muqim, M., Khan, M., Zarin. Experience of laparoscopic appendectomies  
54 versus open appendectomies. Pak J Med Sci. 2010;26(2):324-8.  
55  
56  
57  
58  
59 170. Van Rossem C.C., M.H.F., Schreinemacher, K., Treskes, R.M., Van Hogeand,  
60 A.A.W., Van Geloven. Duration of antibiotic treatment after appendicectomy for acute

- 1  
2  
3 complicated appendicitis. *Br J Surg.* 2014;101(6):715-9.  
4  
5  
6  
7  
8 171. Van Rossem C.C., M.D., Bolmers, M.H., Schreinemacher, A.A., van Geloven, W.A.,  
9 Bemelman. Prospective nationwide outcome audit of surgery for suspected acute  
10 appendicitis. *Br J Surg.* 2016;103(1):144-51.  
11  
12  
13  
14 172. Viet Hung N., T., Anh Thu, V.D., Rosenthal, D., Tat Thanh, N., Quoc Anh, N., Le Bao  
15 Tien, et al. Surgical site infection rates in seven cities in Vietnam: Findings of the  
16 international nosocomial infection control consortium. *Surg Infect.* 2016;17(2):243-9.  
17  
18  
19  
20  
21 173. Rotermann M. Infection after cholecystectomy, hysterectomy or appendectomy. *Health*  
22 *Rep.* 2004;15(4):11-23.  
23  
24  
25  
26 174. Saar S., P., Talving, J., Laos, T., Põdrämägi, M., Sokirjanski, T., Lustenberger, et al.  
27 Delay Between Onset of Symptoms and Surgery in Acute Appendicitis Increases  
28 Perioperative Morbidity: A Prospective Study. *World J Surg.* 2016;40(6):1308-14.  
29  
30  
31  
32  
33 175. Saber A.A., M.H., Elgamal, T.H., El-Ghazaly, A.V., Dewoolkar, A., Akl. Simple  
34 technique for single incision transumbilical laparoscopic appendectomy. *Int J Surg.*  
35 2010;8(2):128-30.  
36  
37  
38  
39  
40 176. Sadraei-Moosavi S.-M., N., Nikhbakhsh, A.-A., Darzi. Postoperative antibiotic therapy  
41 after appendectomy in patients with non-perforated appendicitis. *Caspian J Int Med.*  
42 2017;8(2):104-7.  
43  
44  
45  
46  
47 177. Saha N., D.K., Saha, M.A., Rahman, M.K., Islam, M.A., Aziz. Comparison of post  
48 operative morbidity between laparoscopic and open appendectomy in children.  
49 *Mymensingh Med J.* 2010;19(3):348-52.  
50  
51  
52  
53  
54 178. Sahn M., R., Kube, S., Schmidt, C., Ritter, M., Pross, H., Lippert. Current analysis of  
55 endoloops in appendiceal stump closure. *Surg Endosc Interv Tech.* 2011;25(1):124-9.  
56  
57  
58  
59 179. Sahn M., M., Pross, R., Otto, A., Koch, I., Gastinger, H., Lippert. Clinical health service  
60



- 1  
2  
3 research on the surgical therapy of acute appendicitis: Comparison of outcomes based on 3  
4 German multicenter quality assurance studies over 21 years. *Ann Surg.* 2015;262(2):338-  
5 46.  
6  
7  
8  
9
- 10 180. Salö M., E., Järbur, M., Hambræus, B., Ohlsson, P., Stenström, E., Arnbjörnsson. Two-  
11 trocar appendectomy in children - description of technique and comparison with  
12 conventional laparoscopic appendectomy. *BMC Surg.* 2016;16(1):52.  
13  
14  
15  
16
- 17 181. Sánchez-Santana T., J.A., del-Moral-Luque, P., Gil-Yonte, L., Bañuelos-Andrío, M.,  
18 Durán-Poveda, G., Rodríguez-Caravaca. Effect of compliance with an antibiotic  
19 prophylaxis protocol in surgical site infections in appendectomies. Prospective cohort  
20 study. Efecto de la adecuación a protocolo de la profilaxis antibiótica en la incidencia de  
21 infección quirúrgica en apendicectomías Estudio de cohortes prospectivo. 2017;85(3):208-  
22 13.  
23  
24  
25  
26  
27  
28
- 29 182. Sauvain M.-O., K., Slankamenac, M.K., Muller, S., Wildi, U., Metzger, W., Schmid, et  
30 al. Delaying surgery to perform CT scans for suspected appendicitis decreases the rate of  
31 negative appendectomies without increasing the rate of perforation nor postoperative  
32 complications. *Langenbeck's Arch Surg.* 2016;401(5):643-9.  
33  
34  
35  
36  
37  
38
- 39 183. Scarborough J.E., K.M., Bennett, T.N., Pappas. Racial disparities in outcomes after  
40 appendectomy for acute appendicitis. *Am J Surg.* 2012;204(1):11-7.  
41  
42  
43  
44
- 45 184. Seifarth F.G., N., Kundu, A.D., Guerron, M.M., Garland, M.W., Gaffley, S., Worley, et  
46 al. Umbilical Negative Pressure Dressing for Transumbilical Appendectomy in Children.  
47 *JLS.* 2016;20(4).  
48  
49  
50
- 51 185. Federico G. Seifarth, Kundu, Neilendu, Guerron, Alfredo D., Garland, Mary M.,  
52 Gaffley, Michaela W. G., Worley, Sarah, et al. Umbilical Negative Pressure Dressing for  
53 Transumbilical Appendectomy in Children. *JLS-JOURNAL OF THE SOCIETY OF*  
54 *LAPAROENDOSCOPIC SURGEONS.* 2016;20(4).  
55  
56  
57  
58  
59
- 60 186. Senekjian L., R., Nirula. Tailoring the operative approach for appendicitis to the patient:

- 1  
2  
3 A prediction model from national surgical quality improvement program data. *J Am Coll*  
4 *Surg.* 2013;216(1):34-40.  
5  
6  
7  
8  
9 187. Sesia S.B., M., Frech, F.-M., Häcker, J., Mayr. Laparoscopic "single-port"  
10 appendectomy in children. *Laparoskopische "single port"-appendektomie im Kindesalter.*  
11 2011;136(1):50-5.  
12  
13  
14  
15 188. Shaikh A.R., S., Khatoon, M., Arif. Evaluation of re-admission after open  
16 appendectomy. *Rawal Med J.* 2011;36(2):100-3.  
17  
18  
19  
20  
21  
22 189. Shang Q., Q., Geng, X., Zhang, C., Guo. The efficacy of combined therapy with  
23 metronidazole and broad-spectrum antibiotics on postoperative outcomes for pediatric  
24 patients with perforated appendicitis. *Medicine.* 2017;96(47).  
25  
26  
27  
28  
29 190. Shindholimath V., K., Thinakaran, T., Rao, Y., Veerappa. Laparoscopic management  
30 of appendicular mass. *J Minimal Access Surg.* 2011;7(2):136-40.  
31  
32  
33  
34 191. Shimizu T., M., Ishizuka, K., Kubota. The preoperative serum C-reactive protein level  
35 is a useful predictor of surgical site infections in patients undergoing appendectomy. *Surg*  
36 *Today.* 2015;45(11):1404-10.  
37  
38  
39  
40  
41 192. Siam B., A., Al-Kurd, N., Simanovsky, H., Awesat, Y., Cohn, B., Helou, et al.  
42 Comparison of appendectomy outcomes between senior general surgeons and general  
43 surgery residents. *JAMA Surg.* 2017;152(7):679-85.  
44  
45  
46  
47  
48 193. 서승원, 김신곤. Acute Appendicitis in Pregnant Patients and Non-Pregnant Patients:  
49  
50  
51 Recent Clinical Experience of the Tertiary Hospital Z1 임신부와 가임기 여성의 급성  
52  
53  
54  
55  
56  
57  
58  
59  
60  
충수염의 비교 고찰: 최근 3차 병원의 임상적 경험. *Annals of Surgical Treatment and*  
*Research S1 대한외과학회지.* 2002;62(6):486-90.

- 1  
2  
3  
4  
5  
6  
7 194. Alfredo Silva, M, Guido Vargas, A, Amparo Moreno, H, Pablo Becerra. Utilidad del  
8 retractor elástico abdominal para disminuir el riesgo de infección de herida operatoria en  
9 apendicitis aguda X1 Use of an elasticwall retractor during appendectomy to reduce wound  
10 infection. *Revista chilena de cirugía*. 2008;60(6):527-33.  
11  
12  
13  
14  
15 195. Singh V.K., K., Nishant, B., Kharga, A.K., Kalita, P., Bhutia, J., Jain. Randomized  
16 controlled trial comparing open, conventional, and single port laparoscopic appendectomy.  
17 *J Clin Diagn Res*. 2017;11(10):PC05-PC10.  
18  
19  
20  
21  
22  
23  
24 196. Siribumrungwong B., K., Srikuea, A., Thakkinstian. Comparison of superficial surgical  
25 site infection between delayed primary and primary wound closures in ruptured  
26 appendicitis. *Asian J Surg*. 2014;37(3):120-4.  
27  
28  
29  
30  
31 197. Sivrikoz E., E., Karamanos, E., Beale, P., Teixeira, K., Inaba, D., Demetriades. The  
32 effect of diabetes on outcomes following emergency appendectomy in patients without  
33 comorbidities: A propensity score-matched analysis of National Surgical Quality  
34 Improvement Program database. *Am J Surg*. 2015;209(1):206-11.  
35  
36  
37  
38  
39 198. Soll C., P., Wyss, H., Gelpke, D.A., Raptis, S., Breitenstein. Appendiceal stump closure  
40 using polymeric clips reduces intra-abdominal abscesses. *Langenbeck's Arch Surg*.  
41 2016;401(5):661-6.  
42  
43  
44  
45  
46 199. Sozutek A., T., Colak, M., Dirlik, K., Ocal, O., Turkmenoglu, A., Dag. A prospective  
47 randomized comparison of single-port laparoscopic procedure with open and standard 3-  
48 port laparoscopic procedures in the treatment of acute appendicitis. *Surg Laparoscopy*  
49 *Endosc Percutaneous Tech*. 2013;23(1):74-8.  
50  
51  
52  
53  
54 200. Srishewachart P., S., Narksut. Incidence of abnormal preoperative blood testing and  
55 postoperative complication in appendectomy patients in Siriraj Hospital. *J Med Assoc*  
56 *Thailand*. 2016;99(5):517-24.  
57  
58  
59  
60

- 1  
2  
3 201. Staszewicz W., M.-C., Eisenring, V., Bettschart, S., Harbarth, N., Troillet. Thirteen  
4 years of surgical site infection surveillance in Swiss hospitals. *J Hosp Infect.* 2014;88(1):40-  
5 7.  
6  
7  
8  
9  
10 202. Suttie S.A., S., Seth, C.P., Driver, A.A., Mahomed. Outcome after intra- and extra-  
11 corporeal laparoscopic appendectomy techniques. *Surg Endosc.* 2004;18(7):1123-5.  
12  
13  
14  
15 203. Svensson J.F., B., Patkova, M., Almström, S., Eaton, T., Wester. Outcome after  
16 introduction of laparoscopic appendectomy in children: A cohort study. *J Pediatr Surg.*  
17 2016;51(3):449-53.  
18  
19  
20  
21  
22 204. Taguchi Y., S., Komatsu, E., Sakamoto, S., Norimizu, Y., Shingu, H., Hasegawa.  
23 Laparoscopic versus open surgery for complicated appendicitis in adults: a randomized  
24 controlled trial. *Surg Endosc Interv Tech.* 2016;30(5):1705-12.  
25  
26  
27  
28  
29 205. Tanaka S., D., Kubota, S.H., Lee, K., Oba, M., Matsuyama. Effectiveness of  
30 laparoscopic approach for acute appendicitis. *Osaka City Med J.* 2007;53(1):1-8.  
31  
32  
33  
34 206. Tijerina J., R., Velasco-Rodríguez, C., Vásquez, V., Melnikov, S., Rodriguez.  
35 Effectiveness of a systemic antibiotic followed by topical ionized solution as surgical site  
36 infection prophylaxis. *J Int Med Res.* 2010;38(4):1287-93.  
37  
38  
39  
40  
41 207. The SCARLESS Study Group. Single port/incision laparoscopic surgery compared with  
42 standard three-port laparoscopic surgery for appendectomy: A randomized controlled  
43 trial. *Surg Endosc Interv Tech.* 2015;29(1):77-85.  
44  
45  
46  
47  
48 208. Juan Pablo Toro, Barrera, Óscar Javier, Morales, Carlos Hernando. Superioridad clínica  
49 de la apendicectomía laparoscópica sobre la técnica abierta: ¿adopción lenta de un nuevo  
50 estándar de tratamiento? X1 Clinical superiority of laparoscopic appendectomy over the  
51 open technique: sluggish adoption of a new standard of treatment? *Revista Colombiana de*  
52 *Cirugía.* 2017;32(1):32-9.  
53  
54  
55  
56  
57  
58 209. Towfigh S., T., Clarke, W., Yacoub, A.H., Pooli, R.J., Mason, N., Katkhouda, et al.  
59 Significant reduction of wound infections with daily probing of contaminated wounds : A  
60

- 1  
2  
3 prospective randomized clinical trial. *Arch Surg.* 2011;146(4):448-52.  
4  
5  
6  
7 210. Troillet N., E., Aghayev, M.-C., Eisenring, A.F., Widmer. First Results of the Swiss  
8 National Surgical Site Infection Surveillance Program: Who Seeks Shall Find. *Infect*  
9 *Control Hosp Epidemiol.* 2017;38(6):697-704.  
10  
11  
12  
13 211. Tsioplis C., C., Brockschmidt, S., Sander, D., Henne-Bruns, M., Kornmann. Factors  
14 influencing the course of acute appendicitis in adults and children. *Langenbeck's Arch Surg.*  
15 2013;398(6):857-67.  
16  
17  
18  
19  
20 212. Vahdad M.R., M., Nissen, A., Semaan, T., Klein, E., Palade, T., Boemers, et al.  
21 Experiences with LESS-appendectomy in Children. *Arch Iran Med.* 2016;19(1):57-63.  
22  
23  
24  
25 213. Van Rossem C.C., M.H.F., Schreinemacher, A.A.W., Van Geloven, W.A., Bemelman,  
26 G.J.D., Van Acker, B., Akkermans, et al. Antibiotic duration after laparoscopic  
27 appendectomy for acute complicated appendicitis. *JAMA Surg.* 2016;151(4):323-9.  
28  
29  
30  
31  
32 214. Van Rossem C.C., M.H.F., Schreinemacher, K., Treskes, R.M., Van Hogeand,  
33 A.A.W., Van Geloven. Duration of antibiotic treatment after appendectomy for acute  
34 complicated appendicitis. *Br J Surg.* 2014;101(6):715-9.  
35  
36  
37  
38  
39 215. Wang-Chan A., F.H., Hetzer, C., Gingert, C., Gingert, E., Angst, E., Angst, et al.  
40 Clinical relevance and effect of surgical wound classification in appendicitis: Retrospective  
41 evaluation of wound classification discrepancies between surgeons, Swissnoso-trained  
42 infection control nurse, and histology as well as surgical site infection rates by wound class.  
43 *J Surg Res.* 2017;215:132-9.  
44  
45  
46  
47  
48  
49 216. Watanabe A., S., Kohnoe, H., Sonoda, K., Shirabe, K., Fukuzawa, S., Maekawa, et al.  
50 Effect of intra-abdominal absorbable sutures on surgical site infection. *Surg Today.*  
51 2012;42(1):52-9.  
52  
53  
54  
55  
56 217. Willis Z.I., E.M., Duggan, B.T., Bucher, J.B., Pietsch, M., Milovancev, W., Wharton,  
57 et al. Effect of a clinical practice guideline for pediatric complicated appendicitis. *JAMA*  
58 *Surg.* 2016;151(5).  
59  
60

- 1  
2  
3  
4  
5 218. Ramírez-Wong F.M., T., Atencio-Espinoza, V.D., Rosenthal, E., Ramirez, S.L., Torres-  
6 Zegarra, Z.R., Díaz Tavera, et al. Surgical Site Infections Rates in More Than 13,000  
7 Surgical Procedures in Three Cities in Peru: Findings of the International Nosocomial  
8 Infection Control Consortium. *Surg Infect*. 2015;16(5):572-6.  
9  
10  
11  
12  
13 219. Wu J.-M., K.-H., Chen, H.-F., Lin, L.-M., Tseng, S.-H., Tseng, S.-H., Huang.  
14 Laparoscopic appendectomy in pregnancy. *J Laparoendosc Adv Surg Techn Part A*.  
15 2005;15(5):447-50.  
16  
17  
18  
19  
20 220. Wu H.-S., H.-W., Lai, S.-J., Kuo, Y.-T., Lee, D.-R., Chen, C.-W., Chi, et al. Competitive  
21 edge of laparoscopic appendectomy versus open appendectomy: A subgroup comparison  
22 analysis. *J Laparoendosc Adv Surg Techn*. 2011;21(3):197-202.  
23  
24  
25  
26  
27 221. Wu K., L., Yang, A., Wu, J., Wang, S., Xu, H., Zhao, et al. Single-site laparoscopic  
28 appendectomy in children using conventional instruments: a prospective, randomized,  
29 control trial. *Pediatr Surg Int*. 2014;31(2):167-71.  
30  
31  
32  
33  
34 222. Wu T.-C., Q., Lu, Z.-Y., Huang, X.-H., Liang. Efficacy of emergency laparoscopic  
35 appendectomy in treating complicated appendicitis for elderly patients. *Saudi Med J*.  
36 2017;38(11):1108-12.  
37  
38  
39  
40  
41 223. Yaghoubian A., C., de Virgilio, V., Chiu, S.L., Lee. "July effect" and appendicitis. *J*  
42 *Surg Educ*. 2010;67(3):157-60.  
43  
44  
45  
46 224. Yagnik V., J., Rathod, A., Phatak. A retrospective study of two-port appendectomy and  
47 its comparison with open appendectomy and three-port appendectomy. *Saudi J*  
48 *Gastroenterol*. 2010;16(4):268-71.  
49  
50  
51  
52  
53 225. Yousef Y., F., Yousef, M., Homsy, T., Dinh, K., Pandya, H., Stagg, et al.  
54 Standardization of care for pediatric perforated appendicitis improves outcomes. *J Pediatr*  
55 *Surg*. 2017;52(12):1916-20.  
56  
57  
58  
59  
60 226. Zhang Z., Y., Wang, R., Liu, L., Zhao, H., Liu, J., Zhang, et al. Suprapubic single-

1  
2  
3  
4  
5  
6  
7  
8  
9  
10  
11  
12  
13  
14  
15  
16  
17  
18  
19  
20  
21  
22  
23  
24  
25  
26  
27  
28  
29  
30  
31  
32  
33  
34  
35  
36  
37  
38  
39  
40  
41  
42  
43  
44  
45  
46  
47  
48  
49  
50  
51  
52  
53  
54  
55  
56  
57  
58  
59  
60

incision versus conventional laparoscopic appendectomy. J Surg Res. 2016;200(1):131-8.

For peer review only



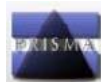

# PRISMA 2009 Checklist

| Section/topic                      | #  | Checklist item                                                                                                                                                                                                                                                                                              | Reported on page # |
|------------------------------------|----|-------------------------------------------------------------------------------------------------------------------------------------------------------------------------------------------------------------------------------------------------------------------------------------------------------------|--------------------|
| <b>TITLE</b>                       |    |                                                                                                                                                                                                                                                                                                             |                    |
| Title                              | 1  | Identify the report as a systematic review, meta-analysis, or both.                                                                                                                                                                                                                                         | 1                  |
| <b>ABSTRACT</b>                    |    |                                                                                                                                                                                                                                                                                                             |                    |
| Structured summary                 | 2  | Provide a structured summary including, as applicable: background; objectives; data sources; study eligibility criteria, participants, and interventions; study appraisal and synthesis methods; results; limitations; conclusions and implications of key findings; systematic review registration number. | 2-3                |
| <b>INTRODUCTION</b>                |    |                                                                                                                                                                                                                                                                                                             |                    |
| Rationale                          | 3  | Describe the rationale for the review in the context of what is already known.                                                                                                                                                                                                                              | 5-6                |
| Objectives                         | 4  | Provide an explicit statement of questions being addressed with reference to participants, interventions, comparisons, outcomes, and study design (PICOS).                                                                                                                                                  | 6                  |
| <b>METHODS</b>                     |    |                                                                                                                                                                                                                                                                                                             |                    |
| Protocol and registration          | 5  | Indicate if a review protocol exists, if and where it can be accessed (e.g., Web address), and, if available, provide registration information including registration number.                                                                                                                               | 8                  |
| Eligibility criteria               | 6  | Specify study characteristics (e.g., PICOS, length of follow-up) and report characteristics (e.g., years considered, language, publication status) used as criteria for eligibility, giving rationale.                                                                                                      | 6                  |
| Information sources                | 7  | Describe all information sources (e.g., databases with dates of coverage, contact with study authors to identify additional studies) in the search and date last searched.                                                                                                                                  | 6                  |
| Search                             | 8  | Present full electronic search strategy for at least one database, including any limits used, such that it could be repeated.                                                                                                                                                                               | 6                  |
| Study selection                    | 9  | State the process for selecting studies (i.e., screening, eligibility, included in systematic review, and, if applicable, included in the meta-analysis).                                                                                                                                                   | 7                  |
| Data collection process            | 10 | Describe method of data extraction from reports (e.g., piloted forms, independently, in duplicate) and any processes for obtaining and confirming data from investigators.                                                                                                                                  | 7                  |
| Data items                         | 11 | List and define all variables for which data were sought (e.g., PICOS, funding sources) and any assumptions and simplifications made.                                                                                                                                                                       | 7                  |
| Risk of bias in individual studies | 12 | Describe methods used for assessing risk of bias of individual studies (including specification of whether this was done at the study or outcome level), and how this information is to be used in any data synthesis.                                                                                      | 8                  |
| Summary measures                   | 13 | State the principal summary measures (e.g., risk ratio, difference in means).                                                                                                                                                                                                                               | 7-8                |
| Synthesis of results               | 14 | Describe the methods of handling data and combining results of studies, if done, including measures of consistency (e.g., $I^2$ ) for each meta-analysis.                                                                                                                                                   | 7-8                |

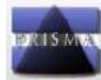

# PRISMA 2009 Checklist

| Section/topic                 | #  | Checklist item                                                                                                                                                                                           | Reported on page # |
|-------------------------------|----|----------------------------------------------------------------------------------------------------------------------------------------------------------------------------------------------------------|--------------------|
| Risk of bias across studies   | 15 | Specify any assessment of risk of bias that may affect the cumulative evidence (e.g., publication bias, selective reporting within studies).                                                             | 7-8                |
| Additional analyses           | 16 | Describe methods of additional analyses (e.g., sensitivity or subgroup analyses, meta-regression), if done, indicating which were pre-specified.                                                         | 8                  |
| <b>RESULTS</b>                |    |                                                                                                                                                                                                          |                    |
| Study selection               | 17 | Give numbers of studies screened, assessed for eligibility, and included in the review, with reasons for exclusions at each stage, ideally with a flow diagram.                                          | 8                  |
| Study characteristics         | 18 | For each study, present characteristics for which data were extracted (e.g., study size, PICOS, follow-up period) and provide the citations.                                                             | 8                  |
| Risk of bias within studies   | 19 | Present data on risk of bias of each study and, if available, any outcome level assessment (see item 12).                                                                                                | 8                  |
| Results of individual studies | 20 | For all outcomes considered (benefits or harms), present, for each study: (a) simple summary data for each intervention group (b) effect estimates and confidence intervals, ideally with a forest plot. | 8-9                |
| Synthesis of results          | 21 | Present results of each meta-analysis done, including confidence intervals and measures of consistency.                                                                                                  | 8-9                |
| Risk of bias across studies   | 22 | Present results of any assessment of risk of bias across studies (see Item 15).                                                                                                                          | 8-9                |
| Additional analysis           | 23 | Give results of additional analyses, if done (e.g., sensitivity or subgroup analyses, meta-regression [see Item 16]).                                                                                    | 9                  |
| <b>DISCUSSION</b>             |    |                                                                                                                                                                                                          |                    |
| Summary of evidence           | 24 | Summarize the main findings including the strength of evidence for each main outcome; consider their relevance to key groups (e.g., healthcare providers, users, and policy makers).                     | 10                 |
| Limitations                   | 25 | Discuss limitations at study and outcome level (e.g., risk of bias), and at review-level (e.g., incomplete retrieval of identified research, reporting bias).                                            | 12                 |
| Conclusions                   | 26 | Provide a general interpretation of the results in the context of other evidence, and implications for future research.                                                                                  | 12                 |
| <b>FUNDING</b>                |    |                                                                                                                                                                                                          |                    |
| Funding                       | 27 | Describe sources of funding for the systematic review and other support (e.g., supply of data); role of funders for the systematic review.                                                               | 14                 |

From: Moher D, Liberati A, Tetzlaff J, Altman DG, The PRISMA Group (2009). Preferred Reporting Items for Systematic Reviews and Meta-Analyses: The PRISMA Statement. PLoS Med 6(7): e1000097. doi:10.1371/journal.pmed1000097

For more information, visit: [www.prisma-statement.org](http://www.prisma-statement.org).

# BMJ Open

## Global incidence of surgical-site infection after appendectomy: a systematic review and meta-analysis

|                                 |                                                                                                                                                                                                                                                                                                                                                                                                                                                                                                                                                                                                                                                                                                                                                                                                                                                                                                                    |
|---------------------------------|--------------------------------------------------------------------------------------------------------------------------------------------------------------------------------------------------------------------------------------------------------------------------------------------------------------------------------------------------------------------------------------------------------------------------------------------------------------------------------------------------------------------------------------------------------------------------------------------------------------------------------------------------------------------------------------------------------------------------------------------------------------------------------------------------------------------------------------------------------------------------------------------------------------------|
| Journal:                        | <i>BMJ Open</i>                                                                                                                                                                                                                                                                                                                                                                                                                                                                                                                                                                                                                                                                                                                                                                                                                                                                                                    |
| Manuscript ID                   | bmjopen-2019-034266.R1                                                                                                                                                                                                                                                                                                                                                                                                                                                                                                                                                                                                                                                                                                                                                                                                                                                                                             |
| Article Type:                   | Original research                                                                                                                                                                                                                                                                                                                                                                                                                                                                                                                                                                                                                                                                                                                                                                                                                                                                                                  |
| Date Submitted by the Author:   | 23-Nov-2019                                                                                                                                                                                                                                                                                                                                                                                                                                                                                                                                                                                                                                                                                                                                                                                                                                                                                                        |
| Complete List of Authors:       | Danwang, Celestin; Universite Libre de Bruxelles, School of Public Health; University of Yaoundé I, Department of Surgery and Specialties, Faculty of Medicine and Biomedical Sciences<br>Bigna, Jean Joel; Centre Pasteur of Cameroon, Department of Epidemiology and Public Health<br>Tochie, Joel Noutakdie; University of Yaoundé I, Department of Anesthesiology and Critical Care Medicine, Faculty of Medicine and Biomedical Sciences<br>Mbonda, Aimé; Djohong District Hospital, Department of General Medicine<br>Mbanga, Clarence; Mankon Sub-divisional Hospital<br>Nzalie, Rolf ; Ngong District Hospital, North Region, Cameroon<br>Guifo, Marc Leroy ; University of Yaoundé I, Department of Surgery and Specialties, Faculty of Medicine and Biomedical Sciences<br>Essomba, Arthur ; University of Yaoundé I, Department of Surgery and Specialties, Faculty of Medicine and Biomedical Sciences |
| <b>Primary Subject Heading</b>: | Surgery                                                                                                                                                                                                                                                                                                                                                                                                                                                                                                                                                                                                                                                                                                                                                                                                                                                                                                            |
| Secondary Subject Heading:      | Global health, Infectious diseases, Public health                                                                                                                                                                                                                                                                                                                                                                                                                                                                                                                                                                                                                                                                                                                                                                                                                                                                  |
| Keywords:                       | EPIDEMIOLOGY, Health policy < HEALTH SERVICES ADMINISTRATION & MANAGEMENT, Quality in health care < HEALTH SERVICES ADMINISTRATION & MANAGEMENT, Epidemiology < INFECTIOUS DISEASES, Public health < INFECTIOUS DISEASES                                                                                                                                                                                                                                                                                                                                                                                                                                                                                                                                                                                                                                                                                           |
|                                 |                                                                                                                                                                                                                                                                                                                                                                                                                                                                                                                                                                                                                                                                                                                                                                                                                                                                                                                    |

SCHOLARONE™  
Manuscripts



I, the Submitting Author has the right to grant and does grant on behalf of all authors of the Work (as defined in the below author licence), an exclusive licence and/or a non-exclusive licence for contributions from authors who are: i) UK Crown employees; ii) where BMJ has agreed a CC-BY licence shall apply, and/or iii) in accordance with the terms applicable for US Federal Government officers or employees acting as part of their official duties; on a worldwide, perpetual, irrevocable, royalty-free basis to BMJ Publishing Group Ltd ("BMJ") its licensees and where the relevant Journal is co-owned by BMJ to the co-owners of the Journal, to publish the Work in this journal and any other BMJ products and to exploit all rights, as set out in our [licence](#).

The Submitting Author accepts and understands that any supply made under these terms is made by BMJ to the Submitting Author unless you are acting as an employee on behalf of your employer or a postgraduate student of an affiliated institution which is paying any applicable article publishing charge ("APC") for Open Access articles. Where the Submitting Author wishes to make the Work available on an Open Access basis (and intends to pay the relevant APC), the terms of reuse of such Open Access shall be governed by a Creative Commons licence – details of these licences and which [Creative Commons](#) licence will apply to this Work are set out in our licence referred to above.

Other than as permitted in any relevant BMJ Author's Self Archiving Policies, I confirm this Work has not been accepted for publication elsewhere, is not being considered for publication elsewhere and does not duplicate material already published. I confirm all authors consent to publication of this Work and authorise the granting of this licence.

# 1 **Global incidence of surgical-site infection after appendectomy: a systematic** 2 **review and meta-analysis**

3 Celestin Danwang<sup>1,2</sup>, Jean Joel Bigna<sup>3\*</sup>, Joel Noutakdie Tochie<sup>4</sup>, Aime Mbonda<sup>5</sup>, Clarence  
4 Mvalo Mbanga<sup>6</sup>, Rolf Nyah Tuku Nzalie<sup>7</sup>, Marc Leroy Guifo<sup>1</sup>, Arthur Essomba<sup>1</sup>

- 5
- 6 1. Department of Surgery and Specialties, Faculty of Medicine and Biomedical Sciences,  
7 University of Yaoundé I, Yaoundé, Cameroon.
- 8 2. School of Public Health, Université Libre de Bruxelles, Brussels, Belgium.
- 9 3. Department of Epidemiology and Public Health, Centre Pasteur of Cameroon, Yaoundé,  
10 Cameroon.
- 11 4. Department of Anesthesiology and Critical Care Medicine, Faculty of Medicine and Biomedical  
12 Sciences, University of Yaoundé I, Yaoundé, Cameroon.
- 13 5. Department of General Medicine, Djohong District Hospital, Djohong, Cameroon.
- 14 6. Department of General Medicine, Mankon Sub-Divisional Hospital, Bamenda,  
15 Cameroon.
- 16 7. Department of General Medicine, Ngong District Hospital, Ngong, Cameroon.

17  
18 \*Corresponding author: Dr. Jean Joel Bigna, MD, MPH

19 Department of Epidemiology and Public Health, Centre Pasteur of Cameroon, Yaoundé,  
20 Cameroon. E-Mail: [bignarimjj@yahoo.fr](mailto:bignarimjj@yahoo.fr)

21  
22 E-mail addresses:

23 CD: [danram07@yahoo.fr](mailto:danram07@yahoo.fr); JJB: [bignarimjj@yahoo.fr](mailto:bignarimjj@yahoo.fr); JNT: [joeltochie@gmail.com](mailto:joeltochie@gmail.com); AM:  
24 [aimembonda@yahoo.fr](mailto:aimembonda@yahoo.fr); CMM: [mbangaclarence@gmail.com](mailto:mbangaclarence@gmail.com); RNN: [nzalieolf@yahoo.com](mailto:nzalieolf@yahoo.com);  
25 GML: [marcleroyguifo@gmail.com](mailto:marcleroyguifo@gmail.com); AE: [artgessomba@gmail.com](mailto:artgessomba@gmail.com)

26  
27 **Word count:** 2,774.

## 28 **Abstract**

29 **Objectives:** Although surgical-site infection (SSI) is one of the most studied healthcare-  
30 associated infections, the global burden of SSI after appendectomy remains unknown. Hence,  
31 we estimated the incidence of SSI after appendectomy at global and regional levels.

32 **Design:** Systematic review and meta-analysis.

33 **Participants:** Patients with appendectomy.

34 **Data sources:** EMBASE, PubMed, and Web of Science were searched to identify observational  
35 studies and clinical trials, published between January 1, 2000 and December 30, 2018 and  
36 reporting on the incidence of the SSI after appendectomy; with no language restriction. A  
37 random-effect models meta-analysis served to obtain the pooled incidence of SSI after 100  
38 surgical procedures in patients with appendectomy.

39 **Results:** In total, 226 studies (729,434 participants from 49 countries) were included in the  
40 meta-analysis. Concerning the methodological quality, 59 (26.1%) studies had a low risk, 147  
41 (65.0%) a moderate risk, and 20 (8.8%) a high risk of bias. We found an overall incidence of  
42 SSIs of 7.0 per 100 surgical procedures (95% prediction interval: 1.0-17.6) for appendectomy  
43 varying from 0 to 37.4 per 100 surgical procedures. Subgroup analysis for identifying sources  
44 of heterogeneity showed that the incidence varied from 5.8 in Europe to 12.6 per 100 surgical  
45 procedures in Africa,  $p < 0.0001$ . The incidence of SSI after appendectomy increased when the  
46 level of income decreased; from 6.2 in high-income countries to 11.1 per 100 surgical  
47 procedures in low-income countries ( $p = 0.015$ ). Open appendectomy (11.0 per 100 surgical  
48 procedures) was found to have a higher incidence of SSI compared to laparoscopy (4.6 per 100  
49 surgical procedures),  $p = 0.0002$ .

50 **Conclusion:** This study suggests a high burden of SSIs after appendectomy in some regions  
51 (especially Africa) and in low-income countries. Strategies are needed to implement and  
52 vulgarize WHO guidelines to decrease the burden of SSI after appendectomy in these regions.

1  
2  
3 53 **Registration:** PROSPERO, CRD42017075257.  
4  
5  
6 54  
7  
8 55  
9

10 56 **Keywords:**

11  
12 57 Surgical wound infection; Global Health; Hospital infections; Cross infection; Healthcare  
13  
14  
15 58 associated infection  
16  
17  
18  
19  
20  
21  
22  
23  
24  
25  
26  
27  
28  
29  
30  
31  
32  
33  
34  
35  
36  
37  
38  
39  
40  
41  
42  
43  
44  
45  
46  
47  
48  
49  
50  
51  
52  
53  
54  
55  
56  
57  
58  
59  
60

For peer review only

## 59 **Strengths and limitations of this study**

- 60 • This meta-analysis is the first to summarize the global incidence of SSIs after  
61 appendectomy.
- 62 • We investigated WHO regions, level of income, and surgical procedure as sources of  
63 heterogeneity.
- 64 • We were not able to investigate all sources of heterogeneity because of missing information  
65 in the original studies.
- 66 • There were few studies from low income countries and from Africa.



## Introduction

Defined as an acute inflammation of the vermiform appendix,<sup>1</sup> evidence abounds that acute appendicitis is the most common abdominal surgical emergency,<sup>2</sup> with an incidence of almost 100 per 100,000 person-years reported in Australia, Europe and North America.<sup>3 4</sup> Evidence suggests appendectomy, a surgical remove of the vermiform appendix as first-line treatment for acute appendicitis, although antibiotic therapy may be efficacious for a selected group of patients with uncomplicated acute appendicitis.<sup>5-7</sup> Appendectomy is a relatively safe surgical intervention with a case fatality rate of 2.1 - 2.4 per 1000 patients as reported in studies conducted in Europe.<sup>8 9</sup>

Innovations in appendectomy, especially with the advent of minimally invasive or laparoscopic surgery in 1983,<sup>10</sup> which has replaced the traditional open appendectomy in most of high-income countries, has led to a drastic reduction in the morbidity and mortality related to appendectomy.<sup>11-13</sup> Laparoscopic appendectomy is now recognized as the gold standard surgical approach for uncomplicated acute appendicitis owing to its merits over open surgery; due to less postoperative pain, reduced postoperative ileus, shorter hospital stay, rapid postoperative recovery, and better aesthetic scars.<sup>14-19</sup>

However, regardless of the surgical technique (laparoscopic or open surgery), appendectomy remains a sceptical surgical intervention associated with a substantial risk of surgical-site infections (SSIs). SSIs after appendectomy are postoperative nosocomial infections affecting the incision site, deep tissues, organs at the operative site within 30 days after the surgical procedure.<sup>20-22</sup> SSI following appendectomy is a serious post-operative medical concern that increases the financial burden for both healthcare systems and patient, and also have a negative impact on the patients' health related quality of life.<sup>23-28</sup>

SSI is both the most frequently studied and the leading healthcare-associated infections reported hospital-wide in low- and middle-income countries.<sup>29</sup> A recently published prospective

1  
2  
3 international multicentre cohort study suggested a high burden of SSIs after any gastrointestinal  
4 surgery in low-income countries compared to high-income countries.<sup>30</sup> Actually, there is no  
5 global systematic review with meta-analysis reporting the burden of SSI after appendectomy or  
6  
7 comparing the burden between regions and between country level of income. It would be  
8 interesting to have such accurately estimated data to construct efficient strategies to curb  
9  
10 globally the burden of SSIs after appendectomy. In an effort to fill this gap, the current  
11  
12 systematic review and meta-analysis aimed at summarizing contemporary data on the  
13  
14 occurrence of SSIs after appendectomy.  
15  
16  
17  
18  
19  
20  
21  
22  
23

## 24 **Methods**

### 25 **Design**

26  
27 This systematic review and meta-analysis was registered in the International Prospective  
28  
29 Register of Systematic Reviews (PROSPERO) under the registration number  
30  
31 CRD42017075257. The protocol has been published in a peer-review journal.<sup>31</sup>  
32  
33  
34  
35

### 36 **Eligibility criteria**

37  
38 We considered observational studies (cross-sectional, case-control, and cohort) and clinical  
39  
40 trials of patients with appendectomy. Outcome of interest was incidence of SSI of enough data  
41  
42 (number of cases of SSI and sample size) to compute this estimate. We excluded letters,  
43  
44 reviews, commentaries and editorials, and studies lacking key data and/or explicit method  
45  
46 description as well as studies in which relevant data on SSIs after appendectomy was impossible  
47  
48 to extract even after contacting the corresponding author.  
49  
50  
51  
52

### 53 **Search strategy**

54  
55 We searched EMBASE, PubMed, and Web of Science (Web of Science Core Collection,  
56  
57 Current Contents Connect, KCI-Korean Journal Database, SciELO Citation Index, Russian  
58  
59  
60

1  
2  
3 Science Citation Index) to identify observational studies, published between January 1, 2000  
4 and December 30, 2018. No language restriction was applied. The initial search strategy was  
5 designed for EMBASE and was adapted for the use in others databases. The search strategy as  
6 illustrated in the Supplementary Table 1 and in the study protocol,<sup>31</sup> was based on the  
7 combination of relevant text words and medical subject headings related to SSIs. Moreover, the  
8 references of all relevant articles found were scrutinized for potential additional data sources.  
9  
10 When a full text was not available, it was requested via the corresponding author by email. For  
11 duplicates or studies published in more than one report, the one reporting the largest sample  
12 size was considered.  
13  
14  
15  
16  
17  
18  
19  
20  
21  
22

### 23 **Study selection**

24  
25  
26  
27 Two reviewers (CD and AM) independently screened the titles and abstract of articles for  
28 eligibility. Full texts of potentially eligible articles were retrieved and screened for final  
29 inclusion. Disagreements between the two reviewers were solved by discussion and when a  
30 consensus was not reached, a third reviewer (JNT) resolved discrepancies. Studies in other  
31 languages than French, English, and Spanish were translated using Google Translate.  
32  
33  
34  
35  
36  
37

### 38 **Data extraction and management**

39  
40  
41 A standardized and pretested data extraction form was used by five reviewers (CD, JNT, AM,  
42 RNZ, CMM) to independently extract data from individual studies. A sixth reviewer (JJB)  
43 independently extracted data for accuracy. The last name of the first author, year of publication,  
44 country, study design, age groups, sample size, mean or median age, proportion of males,  
45 specific conditions of the study population, the surgical method (open surgery or laparoscopy),  
46 and incidence of SSIs after appendectomy in the study population (or enough data to compute  
47 this estimate) were extracted.  
48  
49  
50  
51  
52  
53  
54  
55  
56  
57  
58  
59  
60

1  
2  
3 To assess the methodological quality of each study, two reviewers (CD and CMM) used an  
4 adapted version of the tool of bias assessment for prevalence studies developed by Hoy and  
5 colleagues.<sup>32</sup>  
6  
7  
8  
9

### 10 **Data synthesis and analysis**

11  
12  
13 A meta-analysis was used to summarize data concerning incidence of SSIs, by pooling together  
14 data of studies reporting the incidence of SSIs. Study-specific estimates were then pooled  
15 through a Dersimonian and Laird random-effects meta-analysis model to obtain an overall  
16 summary estimate of the incidence across studies, after stabilizing the variance of individual  
17 studies using the Freeman-Tukey double arc-sine transformation.<sup>33</sup> Incidence was expressed by  
18 100 surgical procedures with their 95% confidence interval and 95% prediction interval.  
19 Heterogeneity was evaluated by the  $\chi^2$  test on Q statistic which is quantified by  $I^2$  values,<sup>34</sup>  
20 assuming that  $I^2$  values of 25%, 50% and 75% represent low, medium and high heterogeneity  
21 respectively.<sup>35</sup> Where substantial heterogeneity ( $I^2 > 50\%$ ) was detected, a subgroup analysis  
22 was performed to detect its possible sources using the following grouping variables: type of  
23 surgery (laparoscopy or open), World Health Organization regions, and country level of  
24 income. A  $p$  value  $< 0.05$  was indicative of significant difference. The meta-regression analysis  
25 was performed to estimate the explained heterogeneity of each covariate included in the  
26 subgroup analysis. Inter-rater agreement for study inclusion was assessed using Cohen's  $\kappa$   
27 coefficient.<sup>36</sup> Funnel plots analysis and Egger's test ( $p < 0.10$ ) were performed to detect the  
28 presence of publication bias.<sup>37</sup> Since we believe that the incidence estimates of interest would likely  
29 be published even if substantially different from previously reported estimates, we have not reported  
30 adjusted incidence estimate in the case of publication bias. Data were analysed using the '*meta*' package  
31 in R, version 3.6.1.  
32  
33  
34  
35  
36  
37  
38  
39  
40  
41  
42  
43  
44  
45  
46  
47  
48  
49  
50  
51  
52  
53  
54  
55

### 56 **Patient and public involvement**

1  
2  
3 Patients or the public were not involved in the design, or conduct, or reporting, or dissemination  
4  
5 of our research.  
6  
7  
8  
9

## 10 **Results**

### 11 **Study selection and characteristics**

12  
13 Overall, 619 records were initially identified. After removal of duplicates, screening of study  
14  
15 titles, abstracts, and full texts; 226 studies including 729,434 patients were finally retained for  
16  
17 meta-analysis (Supplementary Figure 1). The full list of included studies is in the Appendix.  
18  
19 Concerning the methodological quality, 59 (26.1%) studies had a low risk, 147 (65.0%) a  
20  
21 moderate risk and 20 (8.8%) a high risk of bias. Supplementary Table 2 presents characteristics  
22  
23 of included studies. Among the included studies, 154 were done in high-income, 36 upper-  
24  
25 middle, 27 lower-middle, and nine in low-income countries. Overall, most of studies were from  
26  
27 Europe (n = 68) and Americas (n = 67). SSIs were defined according to Center of Disease  
28  
29 Control and Prevention criteria in 50 studies while 25 studies used other criteria. The definition  
30  
31 of SSIs was not clearly given in 151 studies.  
32  
33  
34  
35  
36  
37  
38

### 39 **Overall prevalence**

40  
41 The overall incidence of SSI after appendectomy was 7.0 per 100 surgical procedures (95%  
42  
43 prediction interval: 1.0-17.6) varying from 0% to 37.4% with substantial heterogeneity and  
44  
45 publication bias (Supplementary Figure 2). The sensitive analysis including only studies with  
46  
47 low risk of bias yielded a very close incidence to crude analysis (Table 1).  
48  
49  
50

### 51 **Sources of heterogeneity**

52  
53 According to country level of income (Figure 1), the incidence of SSI after appendectomy  
54  
55 increased when the level of income decreased; from 6.2 in high income countries to 11.1 per  
56  
57 100 surgical procedures in low income countries ( $p = 0.015$ ) (Table 1).  
58  
59  
60

1  
2  
3 The incidence varied widely across WHO regions (Figure 2). The incidence varied from 5.8 in  
4 Europe to 12.6 per 100 surgical procedures in Africa,  $p < 0.0001$  (Table 1). Two regions  
5 (Europe and Americas) had an incidence  $< 6$  per 100 surgical procedures, three an incidence  
6 between 6-10 per 100 procedures (South-East Asia, Eastern Mediterranean, and Western  
7 Pacific), and one an incidence  $> 10$  per 100 procedures (Africa) (Table 1). The incidence also  
8 varied widely in different regions. The incidence varied from 0.2 to 32.0 in Africa, from 1.9 to  
9 37.4 in Western Pacific, from 1.3 to 33.8 in Eastern Mediterranean, from 1.2 to 25.8 in South-  
10 East Asia, from 0.1 to 37.4 in Americas, and from 0 to 20.0 per 100 surgical procedures in  
11 Europe (Figure 2).

12  
13  
14  
15  
16  
17  
18  
19  
20  
21  
22  
23  
24 Open appendectomy with an incidence of 11.0 (95% prediction interval: 0.0-39.3) per 100  
25 surgical procedures was found to have a higher incidence of SSI compared to laparoscopic  
26 appendectomy with an incidence of 4.6 (95% prediction interval: 0.0-14.3) per 100 surgical  
27 procedures,  $p = 0.0002$  (Figure 3).

28  
29  
30  
31  
32  
33 Heterogeneity of the overall incidence of SSI after appendectomy was explained by WHO  
34 regions (17.1%), country level of income (11.1%), and type of surgical procedure (4.9%). In  
35 the meta-regression analysis of 119 studies reporting the information of the use of antibiotics,  
36 there was no association between the variation of SSI incidence and proportion of patients with  
37 the use of antibiotics (coefficient: 0.0010 [95%CI: -0.0004; 0.0023];  $p = 0.170$ ). however, most  
38 (79.5%) of these studies reported using antibiotics for all patients.

## 49 Discussion

50  
51  
52 This first systematic review and meta-analysis of data of 729,434 surgical procedures in 226  
53 studies from 49 countries found an overall incidence of SSIs of 7.0 per 100 surgical procedures  
54 for appendectomy varying from 0 to 37.4 per 100 surgical procedures with substantial  
55 heterogeneity according to WHO regions, country level of income, and type of surgical  
56  
57  
58  
59  
60

1  
2  
3 procedure. The incidence increased with decreasing country level of income and was higher  
4  
5 when using open surgery compared to laparoscopy. The incidence significantly varied by WHO  
6  
7 regions with Africa having the highest burden followed by Western Pacific, Eastern-  
8  
9 Mediterranean, and South-East Asia. We found no association between SSI incidence and  
10  
11 proportion of using antibiotics.  
12  
13

14 Health care-associated infections are acquired by patients when receiving care and are the most  
15  
16 frequent adverse event affecting patient safety worldwide. This includes SSIs after  
17  
18 appendectomy.<sup>38</sup> As reported in a previous systematic review and meta-analysis, SSIs were the  
19  
20 leading infection in hospitals in developed countries.<sup>29</sup> The high incidence we found in this  
21  
22 study suggests that SSIs after appendectomy remains a global public concern. WHO reported  
23  
24 that of every 100 hospitalized patients at any given time, seven in developed and 15 in  
25  
26 developing countries will acquire at least one health care-associated infection.<sup>38</sup> SSIs are mainly  
27  
28 caused by micro-organisms resistant to commonly-used antimicrobials, which can be  
29  
30 multidrug-resistant. Indeed, more than 50% of SSIs can be antibiotic-resistant.<sup>39</sup> The leading  
31  
32 micro-organisms identified in SSIs are *Staphylococcus aureus*, coagulase-negative  
33  
34 staphylococci, and *Escherichia coli* as reported by National Healthcare Safety Network.<sup>39</sup> It is  
35  
36 important to worry since *Staphylococcus aureus* and *Escherichia coli* are the micro-organisms  
37  
38 with highest proportion of antibiotic resistance, respectively resistant to oxacillin/methicillin in  
39  
40 43% of cases and to fluoroquinolones in 25% of cases.<sup>39</sup> A recent international prospective  
41  
42 cohort study shown that 21.6% of patients with SSI after any gastrointestinal surgery had an  
43  
44 infection that was resistant to the prophylactic antibiotic used.<sup>30</sup> There are many factors that can  
45  
46 favour SSI including patient-related and procedural-related variable.<sup>40</sup> These factors can be  
47  
48 classified in two categories; non-modifiable like age and sex and modifiable including  
49  
50 nutritional status, tobacco use, correct use of antibiotics, obesity, diabetes, prolonged surgery  
51  
52 duration, pre-surgery hospital stay of at least two days, lower volume of hospital and surgeons,  
53  
54  
55  
56  
57  
58  
59  
60

1  
2  
3 and the intraoperative techniques.<sup>38</sup> Strategies to curb the burden of SSIs should therefore focus  
4  
5 on addressing these identified factors. However, we were not able to find an association  
6  
7 between SSI with the use antibiotics, may be due to the low variability in the proportion of  
8  
9 antibiotics in the original studies.

10  
11  
12 In our present study looking at specifically SSI after appendectomy, we also found that SSI was  
13  
14 higher in low income countries. Interestingly, there was a trend with increasing incidence when  
15  
16 the country income decreased. The WHO Africa region essentially constituted with sub-  
17  
18 Saharan Africa was the region with highest incidence in this study. The WHO estimates that  
19  
20 the endemic burden of health care-associated infections is two to three time significantly higher  
21  
22 in low- and middle-income countries than in high-income nations.<sup>38</sup> The highest burden found  
23  
24 in Africa may be associated with the fact most of countries in this continent are low income  
25  
26 countries compared to other regions. Indeed, factors associated with increased risk of SSI after  
27  
28 appendectomy may be higher in low-income settings. The burden of diabetes, obesity, and  
29  
30 undernutrition are increasing in low-income countries.<sup>41 42</sup> There is also inadequate use of  
31  
32 antimicrobial in low- and middle-income countries and micro-organisms are more resistant to  
33  
34 prophylactic antibiotics used to prevent SSI in low-income countries compared to high-income  
35  
36 countries.<sup>30 43 44</sup> Lower level income is also associated with lower volume of surgeon and  
37  
38 hospital, factors recognised as associated increased risk of SSIs.<sup>38</sup> The higher incidence found  
39  
40 in low income countries may also be explained by the fact open surgery is the most used surgical  
41  
42 procedure in this setting. Indeed, we found as in other studies that open surgery is associated  
43  
44 with higher incidence of SSIs compared to laparoscopy.<sup>45 46</sup> Laparoscopy is generally indicated  
45  
46 for uncomplicated appendicitis where the dissemination of micro-organism is lower compared  
47  
48 open surgery indicated for perforated appendicitis with peritonitis for example. Moreover, only  
49  
50 few low-income countries have the necessary infrastructure to carry out laparoscopy procedures  
51  
52 compared to high-income countries.<sup>47-49</sup>  
53  
54  
55  
56  
57  
58  
59  
60



1  
2  
3 Our findings have important implications for healthcare providers and health policy makers.  
4  
5 SSIs are among the most preventable healthcare-associated infections.<sup>50 51</sup> They still represent  
6  
7 a significant burden in terms of patient morbidity and mortality and additional costs for  
8  
9 healthcare systems.<sup>38</sup> The prevention of SSI has received considerable attention from surgeons,  
10  
11 infection control professionals, health policy makers, the media and the public since there is a  
12  
13 perception among the public that SSIs may reflect a poor quality of care.<sup>52</sup> However, special  
14  
15 attention is needed for low-income countries and Africa. Strategy to curb the burden of SSIs  
16  
17 after appendectomy as for other surgery procedures should be focused on strategies that can  
18  
19 help to address factors associated with increased risk of SSIs. Therefore, strategies should be a  
20  
21 package including how to address the factors cited above. The 26 WHO recommendations to  
22  
23 avoid SSIs should be vulgarized and implemented,<sup>38</sup> especially in low-income countries.  
24  
25 Strengthening the healthcare systems of low-income countries and of countries in WHO Afro  
26  
27 region is also a paramount by education of healthcare providers and skilling them on the use of  
28  
29 very less invasive surgical procedures.  
30  
31  
32  
33

34  
35 This study should however be interpreted in the context of some drawbacks. Firstly, the same  
36  
37 definition of SSIs was not used by all the included studies. This may lead to an overestimation  
38  
39 or underestimation of the SSIs incidence by individual studies (depending on the definition  
40  
41 used). Secondly, few studies reported on the participants' characteristics and details on the  
42  
43 surgical procedure since this can modify the risk for developing SSIs. We were not therefore  
44  
45 able to measure the impact on our outcome of interest. Thirdly, only a quarter of studies had  
46  
47 low risk of bias, however our analysis including only studies with low risk of bias yielded an  
48  
49 estimate close to the crude incidence. Fourth, the various geographic regions and countries were  
50  
51 variably represented, with some countries with only one study or even no study, which could  
52  
53 affect the generalizability of our findings.  
54  
55  
56  
57  
58  
59  
60

1  
2  
3 Despite these limitations, this is the first systematic review and meta-analysis providing a global  
4 estimate of the burden of SSIs after appendectomy. A protocol had been published before, and  
5  
6 estimate of the burden of SSIs after appendectomy. A protocol had been published before, and  
7  
8 we used rigorous methodological and statistical procedures to obtain and pool data.  
9  
10 Furthermore, subgroup analyses were conducted to investigate the various factors likely  
11  
12 affecting our estimate.  
13  
14

## 17 **Conclusion**

19 This systematic review and meta-analysis compiled data from more than 700,000 people with  
20  
21 appendicitis in 49 countries and pointed a high incidence of SSIs after appendectomy, at 7 per  
22  
23 100 surgical procedures. This estimate seemed higher in some WHO regions (especially Africa)  
24  
25 and in low-income countries. These data suggest that less invasive procedure is associated with  
26  
27 low incidence of SSIs after appendectomy. Strategies are needed to implement already known  
28  
29 guidelines to decrease the burden of SSI after appendectomy. However, in low-income  
30  
31 countries which have weak health systems, cost-effectiveness studies are needed to inform  
32  
33 policies regarding the best strategies for decreasing the burden of SSI after appendectomy.  
34  
35  
36  
37  
38  
39

## 40 **Contributors**

41  
42  
43 CD and JJB conceived the idea of the study and developed the protocol. JJB, CD, and JNT did  
44  
45 the literature search. CD, AM, and JNT selected the studies, CD, JNT, RNZ, AM, CMM, JJB  
46  
47 extracted the relevant information. CD, JJB, and CMM synthesized the data. CD, JNT, CMM,  
48  
49 and JJB wrote the first draft of the paper. CD, JJB, JNT, AB, RNZ, CMM, GML, and AE  
50  
51 critically revised successive drafts of the paper and approved the final version. GML and AE  
52  
53 supervised the overall work, CD and JJB are the guarantors of the review.  
54  
55  
56

## 57 **Acknowledgements**

58  
59 None.  
60

## Funding

This research received no specific grant from any funding agency in the public, commercial or not-for-profit sectors.

## Competing interests

We declare no competing interests.

## Patient consent

Not applicable.

## Data sharing statement

All data generated for this study are in the manuscript and its supporting files.

## Figures Legend

Figure 1. Global incidence of SSI (surgical site infection) after appendectomy by level of country income

Figure 2. Global incidence of SSI (surgical site infection) after appendectomy by WHO regions

Figure 3. Global incidence of SSI (surgical site infection) after appendectomy by type of surgical procedures

## References

1. Giesen LJX, van den Boom AL, van Rossem CC, et al. Retrospective Multicenter Study on Risk Factors for Surgical Site Infections after Appendectomy for Acute Appendicitis. *Dig Surg* 2017;34(2):103-07. doi: 10.1159/000447647 [published Online First: 09/16]
2. Navarro Fernández JA, Tárraga López PJ, Rodríguez Montes JA, et al. Validity of tests performed to diagnose acute abdominal pain in patients admitted at an emergency department. *Rev Esp Enferm Dig* 2009;101(9):610-18. doi: 10.4321/s1130-01082009000900003
3. Ohmann C, Franke C, Kraemer M, et al. Status report on epidemiology of acute appendicitis. *Chirurg* 2002;73(8):769-76. doi: 10.1007/s00104-002-0512-7

- 1  
2  
3 4. Körner H, Söreide JA, Pedersen EJ, et al. Stability in incidence of acute appendicitis. A  
4 population-based longitudinal study. *Dig Surg* 2001;18(1):61-66. doi:  
5 10.1159/000050099  
6
- 7  
8 5. Martínez Carrilero J. Safety and efficacy of antibiotics compared with appendicectomy for  
9 treatment of uncomplicated acute appendicitis: meta-analysis of randomised controlled  
10 trials. *Rev Clin Esp* 2012;212(9):460-60. doi: 10.1016/j.rce.2012.05.005  
11
- 12  
13 6. Varadhan KK, Neal KR, Lobo DN. Safety and efficacy of antibiotics compared with  
14 appendicectomy for treatment of uncomplicated acute appendicitis: meta-analysis of  
15 randomised controlled trials. *BMJ (Clinical research ed)* 2012;344:e2156-e56. doi:  
16 10.1136/bmj.e2156  
17
- 18  
19 7. Masoomi H, Nguyen NT, Dolich MO, et al. Laparoscopic appendectomy trends and  
20 outcomes in the United States: data from the Nationwide Inpatient Sample (NIS), 2004-  
21 2011. *Am Surg* 2014;80(10):1074-77.  
22
- 23  
24 8. Kotaluoto S, Ukkonen M, Pauniahio S-L, et al. Mortality Related to Appendectomy; a  
25 Population Based Analysis over Two Decades in Finland. *World J Surg* 2017;41(1):64-  
26 69. doi: 10.1007/s00268-016-3688-6  
27
- 28  
29 9. Blomqvist PG, Andersson RE, Granath F, et al. Mortality after appendectomy in Sweden,  
30 1987-1996. *Ann Surg* 2001;233(4):455-60. doi: 10.1097/00000658-200104000-00001  
31
- 32  
33 10. Semm K. Endoscopic appendectomy. *Endoscopy* 1983;15(2):59-64. doi: 10.1055/s-2007-  
34 1021466  
35
- 36  
37 11. Xiao Y, Shi G, Zhang J, et al. Surgical site infection after laparoscopic and open  
38 appendectomy: a multicenter large consecutive cohort study. *Surg Endosc*  
39 2015;29(6):1384-93. doi: 10.1007/s00464-014-3809-y [published Online First: 10/11]  
40
- 41  
42 12. Varela JE, Wilson SE, Nguyen NT. Laparoscopic surgery significantly reduces surgical-  
43 site infections compared with open surgery. *Surg Endosc* 2010;24(2):270-76. doi:  
44 10.1007/s00464-009-0569-1 [published Online First: 06/17]  
45
- 46  
47 13. Bregendahl S, Nørgaard M, Laurberg S, et al. Risk of complications and 30-day mortality  
48 after laparoscopic and open appendectomy in a Danish region, 1998-2007;  
49 a population-based study of 18,426 patients. *Pol Przegl Chir* 2013;85(7):395-400. doi:  
50 10.2478/pjs-2013-0060  
51
- 52  
53 14. Sauerland S, Jaschinski T, Neugebauer EA. Laparoscopic versus open surgery for suspected  
54 appendicitis. *The Cochrane database of systematic reviews* 2010(10):CD001546-CD46.  
55 doi: 10.1002/14651858.CD001546.pub3  
56
- 57  
58 15. Aziz O, Athanasiou T, Tekkis PP, et al. Laparoscopic versus open appendectomy in  
59 children: a meta-analysis. *Ann Surg* 2006;243(1):17-27. doi:  
60 10.1097/01.sla.0000193602.74417.14
16. Dai L, Shuai J. Laparoscopic versus open appendectomy in adults and children: A meta-  
analysis of randomized controlled trials. *United European Gastroenterol J*  
2017;5(4):542-53. doi: 10.1177/2050640616661931 [published Online First: 08/16]

17. Markides G, Subar D, Riyad K. Laparoscopic versus open appendectomy in adults with complicated appendicitis: systematic review and meta-analysis. *World J Surg* 2010;34(9):2026-40. doi: 10.1007/s00268-010-0669-z
18. Wei B, Qi C-L, Chen T-F, et al. Laparoscopic versus open appendectomy for acute appendicitis: a metaanalysis. *Surg Endosc* 2011;25(4):1199-208. doi: 10.1007/s00464-010-1344-z [published Online First: 09/17]
19. Li X, Zhang J, Sang L, et al. Laparoscopic versus conventional appendectomy--a meta-analysis of randomized controlled trials. *BMC Gastroenterol* 2010;10:129-29. doi: 10.1186/1471-230X-10-129
20. Horan TC, Gaynes RP, Martone WJ, et al. CDC definitions of nosocomial surgical site infections, 1992: a modification of CDC definitions of surgical wound infections. *Am J Infect Control* 1992;20(5):271-74. doi: 10.1016/s0196-6553(05)80201-9
21. Culver DH, Horan TC, Gaynes RP, et al. Surgical wound infection rates by wound class, operative procedure, and patient risk index. National Nosocomial Infections Surveillance System. *Am J Med* 1991;91(3B):152S-57S. doi: 10.1016/0002-9343(91)90361-z
22. Horan TC, Andrus M, Dudeck MA. CDC/NHSN surveillance definition of health care-associated infection and criteria for specific types of infections in the acute care setting. *Am J Infect Control* 2008;36(5):309-32. doi: 10.1016/j.ajic.2008.03.002
23. Badia JM, Casey AL, Petrosillo N, et al. Impact of surgical site infection on healthcare costs and patient outcomes: a systematic review in six European countries. *J Hosp Infect* 2017;96(1):1-15. doi: 10.1016/j.jhin.2017.03.004 [published Online First: 03/08]
24. Thompson KM, Oldenburg WA, Deschamps C, et al. Chasing zero: the drive to eliminate surgical site infections. *Ann Surg* 2011;254(3):430-37. doi: 10.1097/SLA.0b013e31822cc0ad
25. Hawn MT, Vick CC, Richman J, et al. Surgical site infection prevention: time to move beyond the surgical care improvement program. *Ann Surg* 2011;254(3):494-501. doi: 10.1097/SLA.0b013e31822c6929
26. Mehta JA, Sable SA, Nagral S. Updated recommendations for control of surgical site infections. *Ann Surg* 2015;261(3):e65-e65. doi: 10.1097/SLA.0b013e318289c5fd
27. Andersson RE. Short-term complications and long-term morbidity of laparoscopic and open appendectomy in a national cohort. *Br J Surg* 2014;101(9):1135-42. doi: 10.1002/bjs.9552 [published Online First: 06/30]
28. Pinkney TD, Calvert M, Bartlett DC, et al. Impact of wound edge protection devices on surgical site infection after laparotomy: multicentre randomised controlled trial (ROSSINI Trial). *BMJ (Clinical research ed)* 2013;347:f4305-f05. doi: 10.1136/bmj.f4305
29. Allegranzi B, Bagheri Nejad S, Combescure C, et al. Burden of endemic health-care-associated infection in developing countries: systematic review and meta-analysis.

- 1  
2  
3 *Lancet (London, England)* 2011;377(9761):228-41. doi: 10.1016/S0140-  
4 6736(10)61458-4 [published Online First: 12/09]  
5  
6  
7 30. GlobalSurg Collaborative. Surgical site infection after gastrointestinal surgery in high-  
8 income, middle-income, and low-income countries: a prospective, international,  
9 multicentre cohort study. *Lancet Infect Dis* 2018;18(5):516-25. doi: 10.1016/S1473-  
10 3099(18)30101-4 [published Online First: 02/13]  
11  
12 31. Danwang C, Mazou TN, Tochie JN, et al. Global prevalence and incidence of surgical site  
13 infections after appendectomy: a systematic review and meta-analysis protocol. *BMJ*  
14 *open* 2018;8(8):e020101-e01. doi: 10.1136/bmjopen-2017-020101  
15  
16 32. Hoy D, Brooks P, Woolf A, et al. Assessing risk of bias in prevalence studies: modification  
17 of an existing tool and evidence of interrater agreement. *J Clin Epidemiol*  
18 2012;65(9):934-9. doi: 10.1016/j.jclinepi.2011.11.014 [published Online First:  
19 2012/06/30]  
20  
21 33. Barendregt JJ, Doi SA, Lee YY, et al. Meta-analysis of prevalence. *Journal of epidemiology*  
22 *and community health* 2013;67(11):974-78. doi: 10.1136/jech-2013-203104 [published  
23 Online First: 08/20]  
24  
25 34. Cochran WG. The Combination of Estimates from Different Experiments. *Biometrics*  
26 1954;10(1):101-29.  
27  
28 35. Higgins JPT, Thompson SG, Deeks JJ, et al. Measuring inconsistency in meta-analyses.  
29 *BMJ (Clinical research ed)* 2003;327(7414):557-60. doi: 10.1136/bmj.327.7414.557  
30  
31 36. Viera AJ, Garrett JM. Understanding interobserver agreement: the kappa statistic. *Fam Med*  
32 2005;37(5):360-63.  
33  
34 37. Egger M, Davey Smith G, Schneider M, et al. Bias in meta-analysis detected by a simple,  
35 graphical test. *BMJ (Clinical research ed)* 1997;315(7109):629-34. doi:  
36 10.1136/bmj.315.7109.629 [published Online First: 1997/10/06]  
37  
38 38. WHO. Global guidelines on the prevention of surgical site infection: WHO; 2016 [Available  
39 from: [https://apps.who.int/iris/bitstream/handle/10665/250680/9789241549882-  
40 eng.pdf?sequence=8](https://apps.who.int/iris/bitstream/handle/10665/250680/9789241549882-eng.pdf?sequence=8) accessed Nov 23 2019].  
41  
42 39. Sievert DM, Ricks P, Edwards JR, et al. Antimicrobial-resistant pathogens associated with  
43 healthcare-associated infections: summary of data reported to the National Healthcare  
44 Safety Network at the Centers for Disease Control and Prevention, 2009-2010. *Infect*  
45 *Control Hosp Epidemiol* 2013;34(1):1-14. doi: 10.1086/668770 [published Online First:  
46 11/27]  
47  
48 40. Buggy D. Can anaesthetic management influence surgical-wound healing? *Lancet (London,*  
49 *England)* 2000;356(9227):355-57. doi: 10.1016/S0140-6736(00)02523-X  
50  
51 41. Seidell JC, Halberstadt J. The global burden of obesity and the challenges of prevention.  
52 *Ann Nutr Metab* 2015;66 Suppl 2:7-12. doi: 10.1159/000375143 [published Online  
53 First: 06/02]  
54  
55  
56  
57  
58  
59  
60



- 1
- 2
- 3 42. Checkley W, Ghannem H, Irazola V, et al. Management of NCD in low- and middle-income
- 4 countries. *Glob Heart* 2014;9(4):431-43. doi: 10.1016/j.ghheart.2014.11.003
- 5
- 6 43. Versporten A, Zarb P, Caniaux I, et al. Antimicrobial consumption and resistance in adult
- 7 hospital inpatients in 53 countries: results of an internet-based global point prevalence
- 8 survey. *Lancet Glob Health* 2018;6(6):e619-e29. doi: 10.1016/S2214-109X(18)30186-
- 9 4 [published Online First: 04/23]
- 10
- 11 44. Klein EY, Van Boeckel TP, Martinez EM, et al. Global increase and geographic
- 12 convergence in antibiotic consumption between 2000 and 2015. *Proceedings of the*
- 13 *National Academy of Sciences of the United States of America* 2018;115(15):E3463-
- 14 E70. doi: 10.1073/pnas.1717295115 [published Online First: 03/26]
- 15
- 16 45. Foster D, Kethman W, Cai LZ, et al. Surgical Site Infections after Appendectomy
- 17 Performed in Low and Middle Human Development-Index Countries: A Systematic
- 18 Review. *Surg Infect (Larchmt)* 2018;19(3):237-44. doi: 10.1089/sur.2017.188
- 19 [published Online First: 10/23]
- 20
- 21 46. Marchi M, Pan A, Gagliotti C, et al. The Italian national surgical site infection surveillance
- 22 programme and its positive impact, 2009 to 2011. *Euro Surveill* 2014;19(21):20815.
- 23 doi: 10.2807/1560-7917.es2014.19.21.20815
- 24
- 25 47. Udwardia TE. Diagnostic laparoscopy. *Surg Endosc* 2004;18(1):6-10. doi: 10.1007/s00464-
- 26 002-8872-0 [published Online First: 09/10]
- 27
- 28 48. Adisa AO, Lawal OO, Arowolo OA, et al. Local adaptations aid establishment of
- 29 laparoscopic surgery in a semiurban Nigerian hospital. *Surg Endosc* 2013;27(2):390-
- 30 93. doi: 10.1007/s00464-012-2463-5 [published Online First: 07/18]
- 31
- 32 49. Alfa-Wali M, Osaghae S. Practice, training and safety of laparoscopic surgery in low and
- 33 middle-income countries. *World J Gastrointest Surg* 2017;9(1):13-18. doi:
- 34 10.4240/wjgs.v9.i1.13
- 35
- 36 50. Haley RW, Culver DH, White JW, et al. The efficacy of infection surveillance and control
- 37 programs in preventing nosocomial infections in US hospitals. *American journal of*
- 38 *epidemiology* 1985;121(2):182-205. doi: 10.1093/oxfordjournals.aje.a113990
- 39
- 40 51. Harbarth S, Sax H, Gastmeier P. The preventable proportion of nosocomial infections: an
- 41 overview of published reports. *J Hosp Infect* 2003;54(4):258-321. doi: 10.1016/s0195-
- 42 6701(03)00150-6
- 43
- 44 52. Birgand G, Lepelletier D, Baron G, et al. Agreement among healthcare professionals in ten
- 45 European countries in diagnosing case-vignettes of surgical-site infections. *PloS one*
- 46 2013;8(7):e68618-e18. doi: 10.1371/journal.pone.0068618
- 47
- 48
- 49
- 50
- 51
- 52
- 53
- 54
- 55
- 56
- 57
- 58
- 59
- 60

1  
2  
3  
4  
5  
6  
7  
8  
9  
10  
11  
12  
13  
14  
15  
16  
17  
18  
19  
20  
21  
22  
23  
24  
25  
26  
27  
28  
29  
30  
31  
32  
33  
34  
35  
36  
37  
38  
39  
40  
41  
42  
43  
44  
45  
46

**Table 1. Summary statistics of meta-analysis incidence of surgery site infections after appendectomy**

|                                      | Incidence per 100 surgical procedures (95%CI) | 95% Prediction interval | N studies | N participants | H (95%CI)        | I <sup>2</sup> (95%CI) | P heterogeneity | P Egger test | P difference |
|--------------------------------------|-----------------------------------------------|-------------------------|-----------|----------------|------------------|------------------------|-----------------|--------------|--------------|
| <b>Global</b>                        | 7.0 (6.4-7.7)                                 | 1.0-17.7                | 226       | 729,434        | 8.9 (8.7-9.1)    | 98.7 (98.7-98.8)       | < 0.0001        | < 0.0001     | -            |
| - Low risk of bias                   | 6.9 (6.0-7.9)                                 | 1.6-15.2                | 59        | 204,450        | 6.7 (6.3-7.1)    | 97.7 (97.4-98.0)       | < 0.0001        | < 0.0001     | -            |
| <b>By Level of income</b>            |                                               |                         |           |                |                  |                        |                 |              |              |
| - Low                                | 11.1 (5.5-18.2)                               | 0.0-42.2                | 9         | 1,496          | 3.8 (3.0-4.8)    | 93.1 (89.0-95.6)       | < 0.0001        | 0.735        | 0.015        |
| - Lower-middle                       | 9.2 (6.3-12.6)                                | 0.0-31.6                | 27        | 10,379         | 5.1 (4.6-5.7)    | 96.2 (95.3-96.9)       | < 0.0001        | 0.960        |              |
| - Upper-middle                       | 8.5 (6.5-10.8)                                | 0.3-25.3                | 36        | 26,557         | 5.4 (2.9-5.9)    | 96.6 (95.9-97.1)       | < 0.0001        | 0.392        |              |
| - High                               | 6.2 (5.6-6.9)                                 | 0.9-15.3                | 154       | 691,002        | 9.5 (9.2-9.8)    | 98.9 (98.8-99.0)       | < 0.0001        | < 0.0001     |              |
| <b>By WHO regions</b>                |                                               |                         |           |                |                  |                        |                 |              |              |
| - Africa                             | 12.6 (3.3-26.4)                               | 0.0-72.5                | 8         | 3,001          | 9.1 (7.9-10.5)   | 98.8 (98.4-99.1)       | < 0.0001        | 0.628        | < 0.0001     |
| - Western Pacific                    | 9.6 (8.1-11.2)                                | 2.3-20.8                | 43        | 30,822         | 3.8 (3.5-4.2)    | 93.2 (91.7-94.4)       | < 0.0001        | 0.150        |              |
| - Eastern Mediterranean              | 8.2 (6.4-10.2)                                | 1.7-18.6                | 23        | 7,779          | 2.6 (2.2-3.1)    | 85.3 (79.1-89.6)       | < 0.0001        | 0.515        |              |
| - South-East Asia                    | 7.6 (4.7-11.1)                                | 0.0-24.6                | 16        | 5,782          | 3.8 (3.2-4.5)    | 93.0 (90.1-95.0)       | < 0.0001        | 0.0001       |              |
| - Americas                           | 5.9 (5.2-6.6)                                 | 1.9-11.7                | 67        | 401,931        | 7.5 (7.1-7.9)    | 98.2 (98.0-98.4)       | < 0.0001        | 0.0004       |              |
| - Europe                             | 5.8 (4.6-7.0)                                 | 0.0-19.1                | 68        | 276,793        | 10.4 (10.0-10.8) | 99.1 (99.0-99.1)       | < 0.0001        | < 0.0001     |              |
| <b>By type of surgical procedure</b> |                                               |                         |           |                |                  |                        |                 |              |              |
| - Laparoscopy with open surgery      | 4.6 (2.5-7.2)                                 | 0.0-15.6                | 10        | 4,892          | 3.2 (2.6-4.2)    | 90.7 (85.0-94.2)       | < 0.0001        | 0.942        | 0.0002       |
| - Laparoscopy                        | 4.6 (3.4-5.9)                                 | 0.0-14.3                | 40        | 33,873         | 4.4 (4.0-4.8)    | 94.7 (93.6-95.7)       | < 0.0001        | 0.0002       |              |
| - Open surgery                       | 11.0 (7.9-14.4)                               | 0.0-39.3                | 44        | 13,120         | 5.7 (5.2-6.1)    | 96.9 (96.4-97.3)       | < 0.0001        | 0.077        |              |

WHO: World Health Organization; CI: confidence interval; H: H statistics



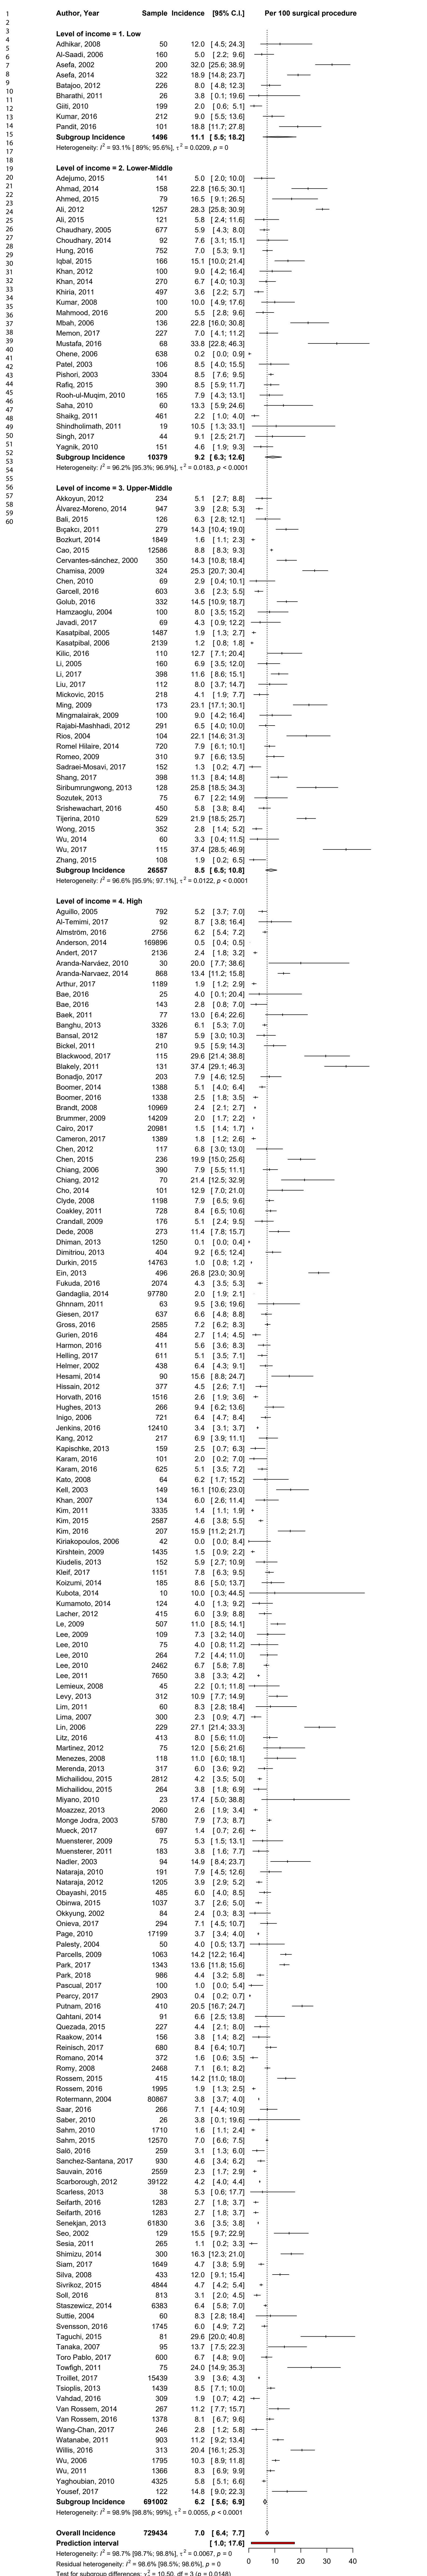



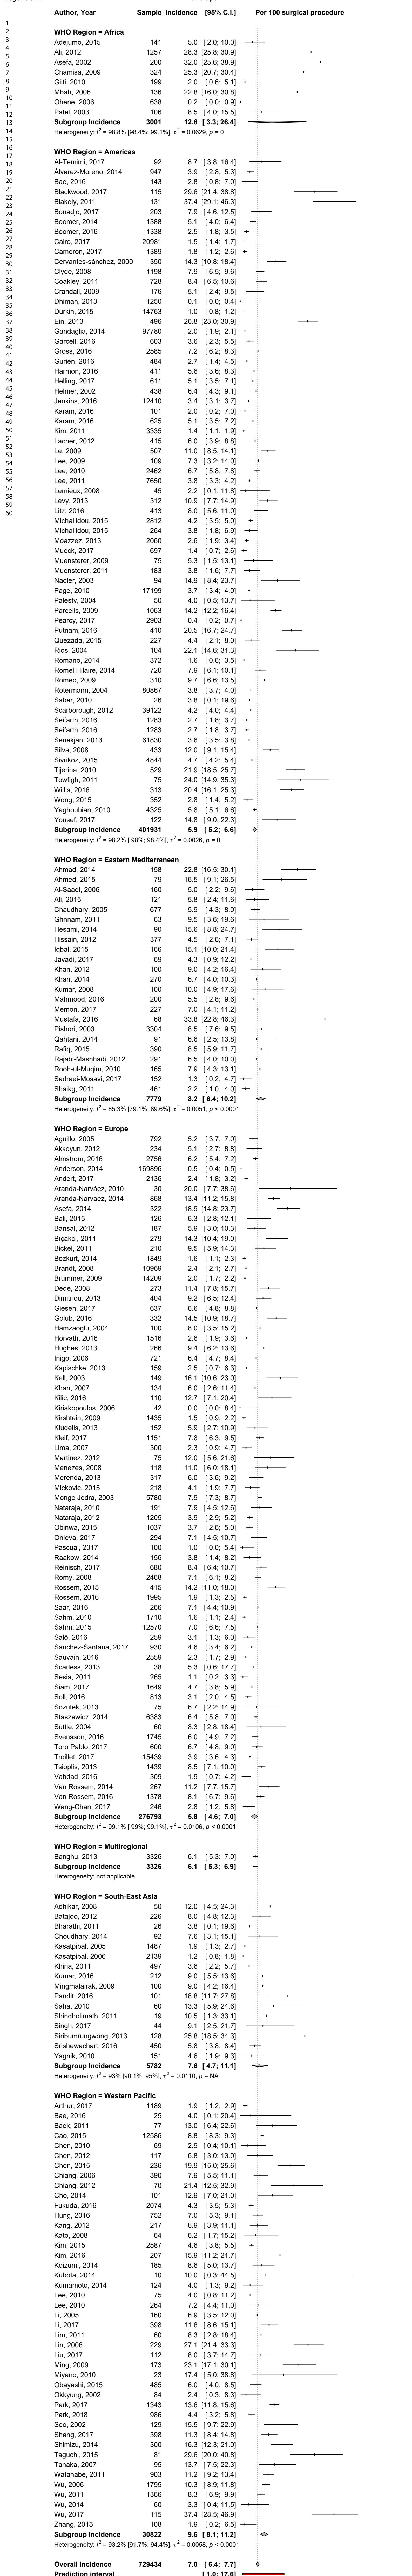

**Author, Year**                      **Sample**   **Incidence**   **[95% C.I.]**                      **Per 100 surgical procedure**

**Procedure = Laparoscopy**

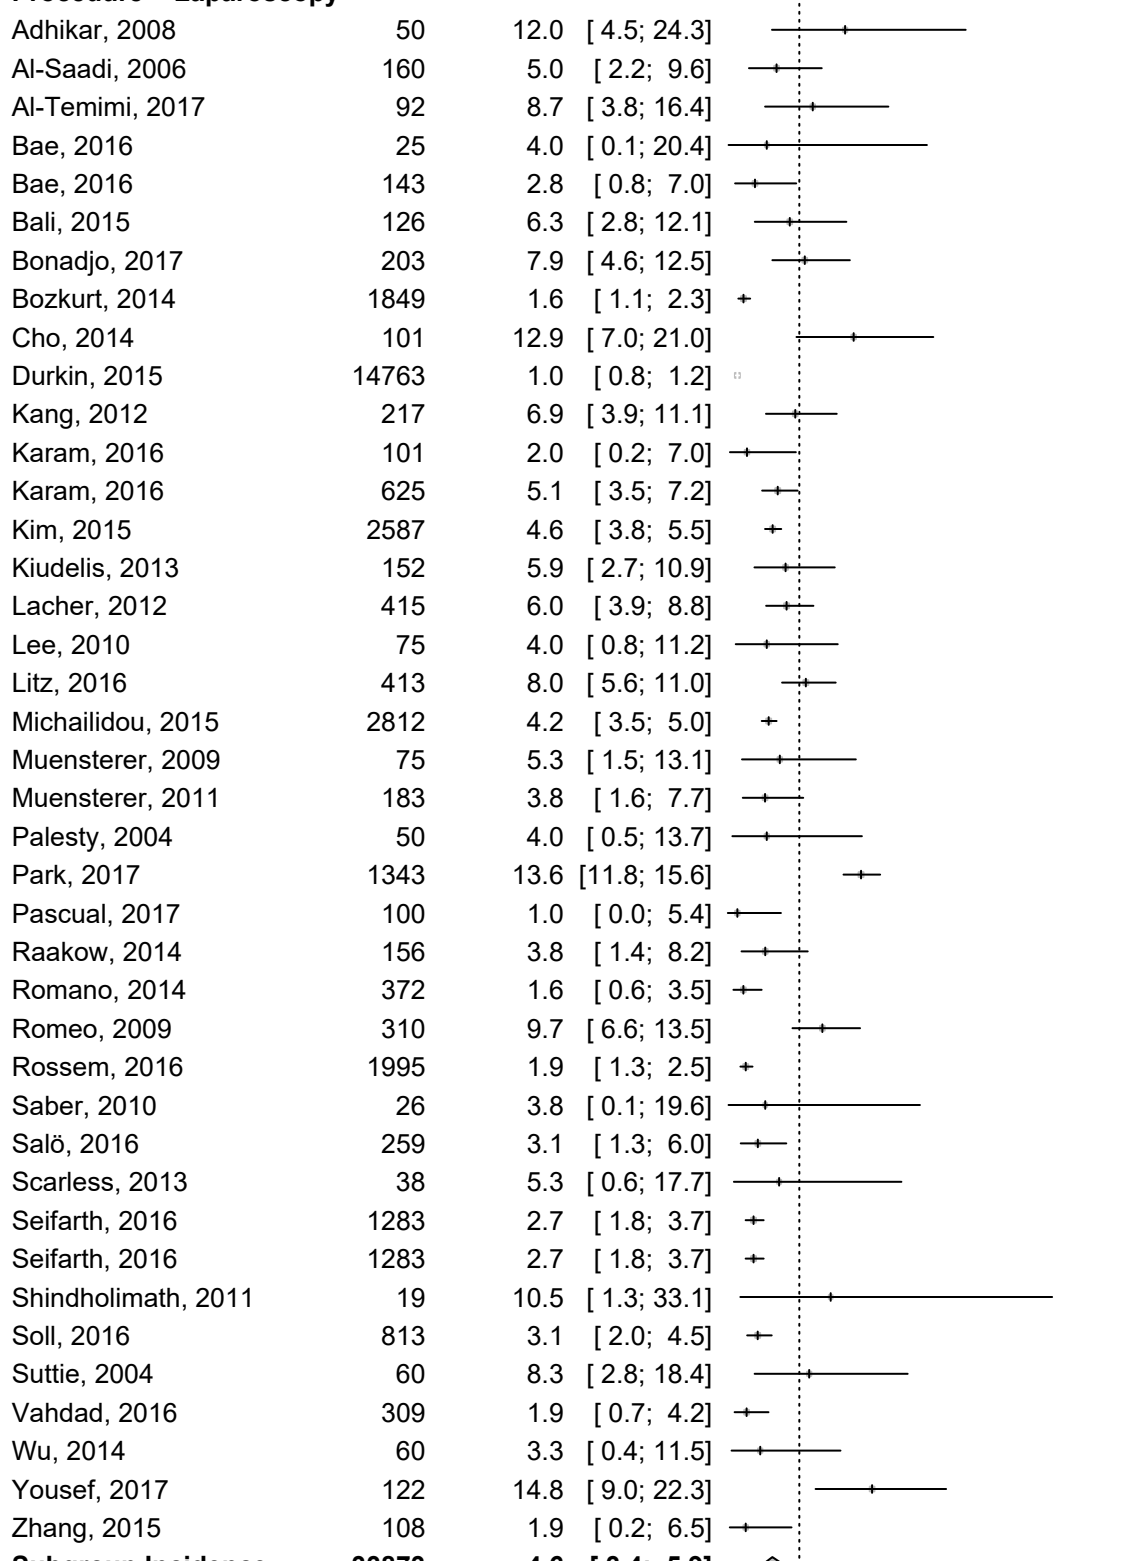

**Procedure = Laparoscopy with Open Surgery**

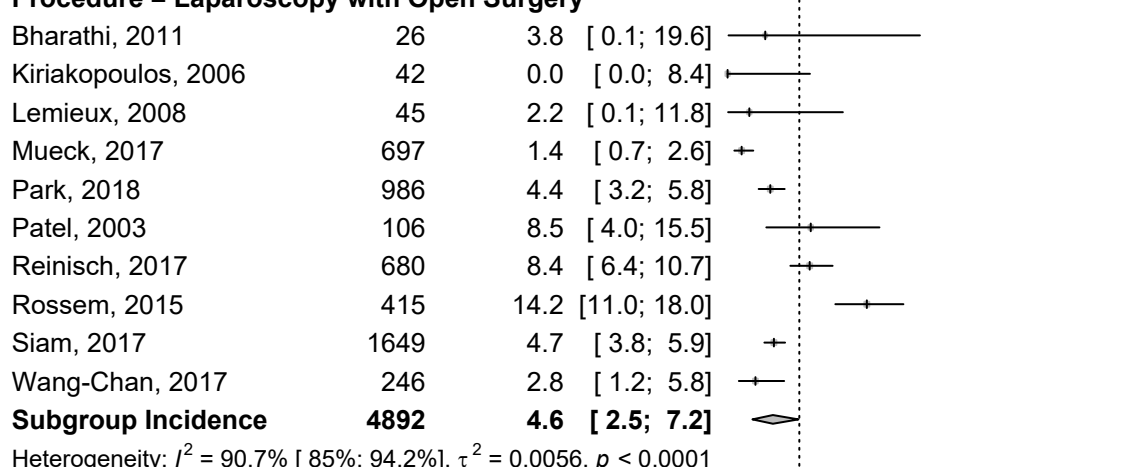

**Procedure = Open Surgery**

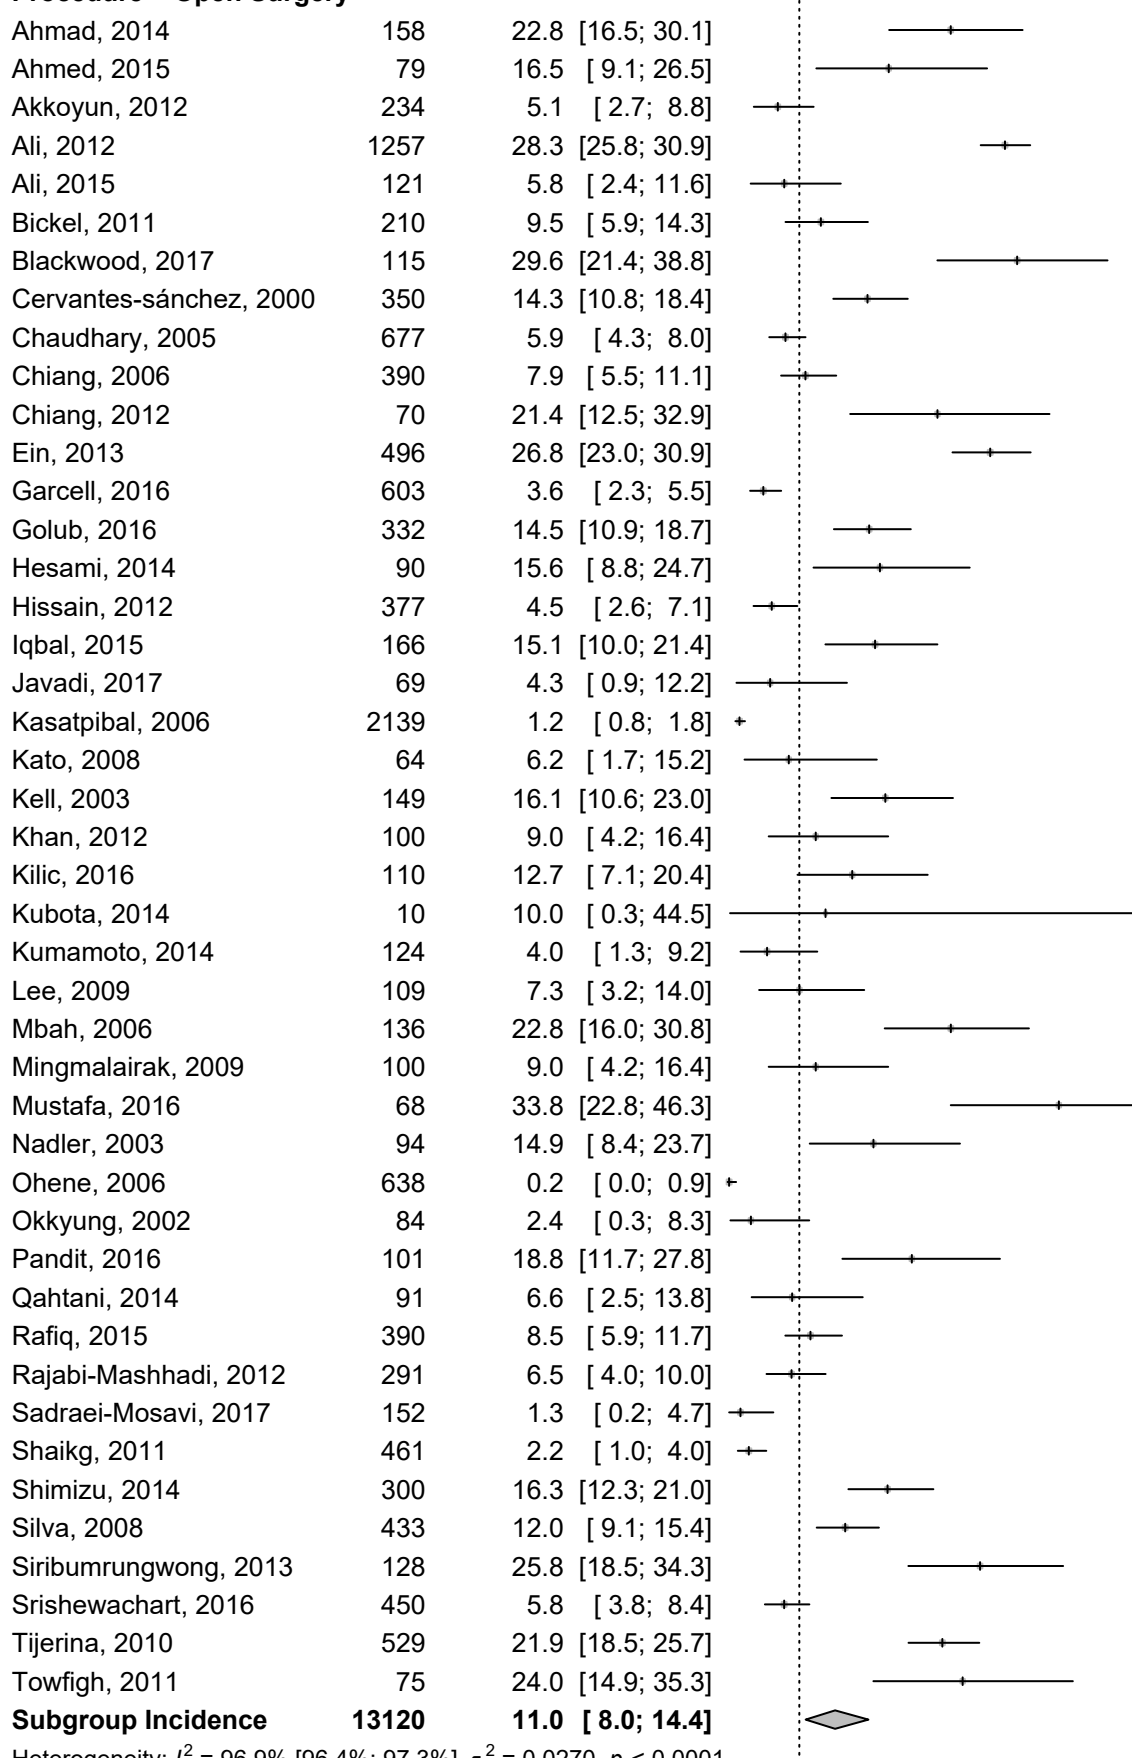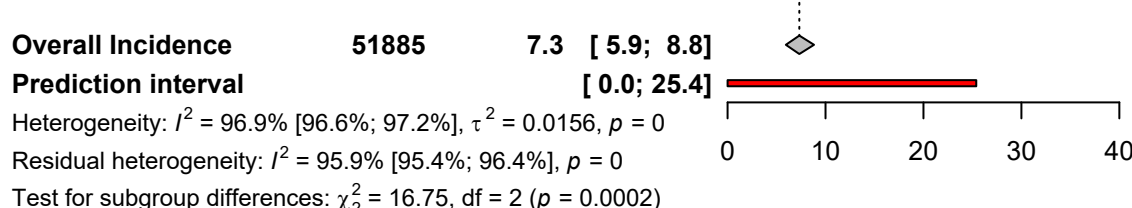



## MOOSE Checklist for Meta-analyses of Observational Studies

| Item No                                     | Recommendation                                                                                                                                                                                                                                                               | Reported on Page No                |
|---------------------------------------------|------------------------------------------------------------------------------------------------------------------------------------------------------------------------------------------------------------------------------------------------------------------------------|------------------------------------|
| Reporting of background should include      |                                                                                                                                                                                                                                                                              |                                    |
| 1                                           | Problem definition                                                                                                                                                                                                                                                           | 5                                  |
| 2                                           | Hypothesis statement                                                                                                                                                                                                                                                         | 6                                  |
| 3                                           | Description of study outcome(s)                                                                                                                                                                                                                                              | 5                                  |
| 4                                           | Type of exposure or intervention used                                                                                                                                                                                                                                        | NA                                 |
| 5                                           | Type of study designs used                                                                                                                                                                                                                                                   | 5-6                                |
| 6                                           | Study population                                                                                                                                                                                                                                                             | 5-6                                |
| Reporting of search strategy should include |                                                                                                                                                                                                                                                                              |                                    |
| 7                                           | Qualifications of searchers (eg, librarians and investigators)                                                                                                                                                                                                               | 13                                 |
| 8                                           | Search strategy, including time period included in the synthesis and key words                                                                                                                                                                                               | 6; Suppl. Table 1                  |
| 9                                           | Effort to include all available studies, including contact with authors                                                                                                                                                                                                      | 6                                  |
| 10                                          | Databases and registries searched                                                                                                                                                                                                                                            | 6                                  |
| 11                                          | Search software used, name and version, including special features used (eg, explosion)                                                                                                                                                                                      | 6                                  |
| 12                                          | Use of hand searching (eg, reference lists of obtained articles)                                                                                                                                                                                                             | 6                                  |
| 13                                          | List of citations located and those excluded, including justification                                                                                                                                                                                                        | 8, Suppl. Fig 1, Suppl. References |
| 14                                          | Method of addressing articles published in languages other than English                                                                                                                                                                                                      | 7                                  |
| 15                                          | Method of handling abstracts and unpublished studies                                                                                                                                                                                                                         | 7                                  |
| 16                                          | Description of any contact with authors                                                                                                                                                                                                                                      | 6                                  |
| Reporting of methods should include         |                                                                                                                                                                                                                                                                              |                                    |
| 17                                          | Description of relevance or appropriateness of studies assembled for assessing the hypothesis to be tested                                                                                                                                                                   | 6                                  |
| 18                                          | Rationale for the selection and coding of data (eg, sound clinical principles or convenience)                                                                                                                                                                                | 6-7                                |
| 19                                          | Documentation of how data were classified and coded (eg, multiple raters, blinding and interrater reliability)                                                                                                                                                               | 6-7                                |
| 20                                          | Assessment of confounding (eg, comparability of cases and controls in studies where appropriate)                                                                                                                                                                             | 8                                  |
| 21                                          | Assessment of study quality, including blinding of quality assessors, stratification or regression on possible predictors of study results                                                                                                                                   | 8                                  |
| 22                                          | Assessment of heterogeneity                                                                                                                                                                                                                                                  | 7                                  |
| 23                                          | Description of statistical methods (eg, complete description of fixed or random effects models, justification of whether the chosen models account for predictors of study results, dose-response models, or cumulative meta-analysis) in sufficient detail to be replicated | 7-8                                |
| 24                                          | Provision of appropriate tables and graphics                                                                                                                                                                                                                                 | Table 1; Fig 1-3                   |
| Reporting of results should include         |                                                                                                                                                                                                                                                                              |                                    |
| 25                                          | Graphic summarizing individual study estimates and overall estimate                                                                                                                                                                                                          | Fig 1-3                            |
| 26                                          | Table giving descriptive information for each study included                                                                                                                                                                                                                 | Suppl. Table 1                     |
| 27                                          | Results of sensitivity testing (eg, subgroup analysis)                                                                                                                                                                                                                       | 9; Table 1                         |

| 28                                      | Indication of statistical uncertainty of findings                                                                         | 9; Table 1;<br>Fig 1-3 |
|-----------------------------------------|---------------------------------------------------------------------------------------------------------------------------|------------------------|
| Item No                                 | Recommendation                                                                                                            | Reported on Page No    |
| Reporting of discussion should include  |                                                                                                                           |                        |
| 29                                      | Quantitative assessment of bias (eg, publication bias)                                                                    | 12-13                  |
| 30                                      | Justification for exclusion (eg, exclusion of non-English language citations)                                             | 12-13                  |
| 31                                      | Assessment of quality of included studies                                                                                 | 12-13                  |
| Reporting of conclusions should include |                                                                                                                           |                        |
| 32                                      | Consideration of alternative explanations for observed results                                                            | 13                     |
| 33                                      | Generalization of the conclusions (ie, appropriate for the data presented and within the domain of the literature review) | 13                     |
| 34                                      | Guidelines for future research                                                                                            | 13                     |
| 35                                      | Disclosure of funding source                                                                                              | 14                     |

From: Stroup DF, Berlin JA, Morton SC, et al, for the Meta-analysis Of Observational Studies in Epidemiology (MOOSE) Group. Meta-analysis of Observational Studies in Epidemiology. A Proposal for Reporting. *JAMA*. 2000;283(15):2008-2012. doi: 10.1001/jama.283.15.2008.

# Global incidence of surgical-site infection after appendectomy: a systematic review and meta-analysis

## APPENDIX

---

Celestin **Danwang**, Jean Joel **Bigna**, Joel Noutakdie **Tochie**,  
 Aime **Mbonda**, Clarence Mvalo **Mbanga**, Rolf Nyah Tuku **Nzalie**,  
 Marc Leroy **Guifo**, Arthur **Essomba**

|                                                                             |    |
|-----------------------------------------------------------------------------|----|
| Supplementary Figure 1. Study flow .....                                    | 2  |
| Supplementary Figure 2. Funnel plot for publication bias .....              | 3  |
| Supplementary Table 1. Search strategy in EMBASE .....                      | 4  |
| Supplementary Table 2 : Characteristics of included studies .....           | 5  |
| Supplementary Table 3. Individual characteristics of included studies ..... | 7  |
| Reference list of included studies.....                                     | 23 |

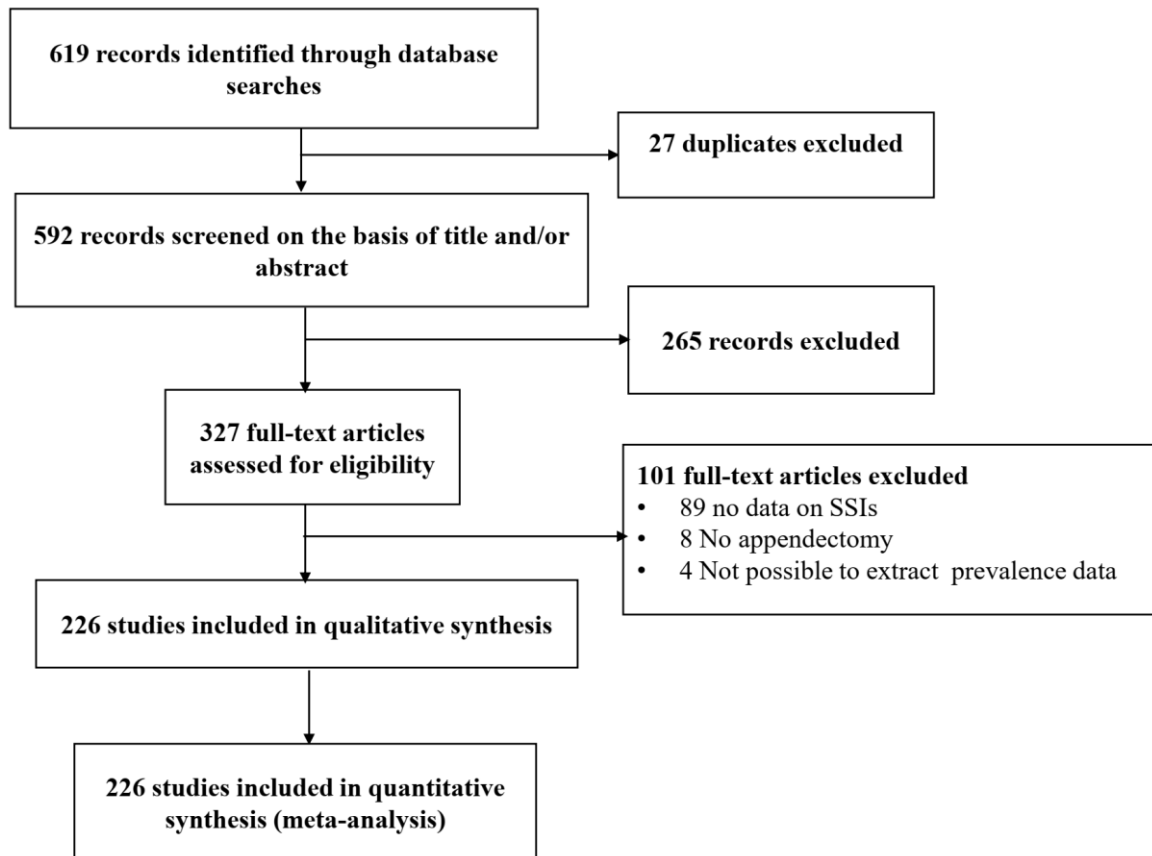

Supplementary Figure 1. Study flow

review only

1  
2  
3  
4  
5  
6  
7  
8  
9  
10  
11  
12  
13  
14  
15  
16  
17  
18  
19  
20  
21  
22  
23  
24  
25  
26  
27  
28  
29  
30  
31  
32  
33  
34  
35  
36  
37  
38  
39  
40  
41  
42  
43  
44  
45  
46  
47  
48  
49  
50  
51  
52  
53  
54  
55  
56  
57  
58  
59  
60



Supplementary Figure 2. Funnel plot for publication bias



Supplementary Table 1. Search strategy in EMBASE

|           | <b>Search terms</b>                                                                                                                                                                                                                                                                                                                                                                                             |
|-----------|-----------------------------------------------------------------------------------------------------------------------------------------------------------------------------------------------------------------------------------------------------------------------------------------------------------------------------------------------------------------------------------------------------------------|
| <b>#1</b> | 'appendectomy'/exp OR appendectomy OR 'appendicectomy'/exp OR appendicectomy OR appendices OR 'appendix epiploica' OR 'omental appendix' OR 'appendicitis'/exp OR appendicitis                                                                                                                                                                                                                                  |
| <b>#2</b> | 'surgical site infection'/exp OR 'surgical site infection' OR 'surgical wound infection'/exp OR 'surgical wound infection' OR 'surgical wound infections'/exp OR 'surgical wound infections' OR 'surgical site infections' OR 'operative site infections' OR 'postoperative wound infections'/exp OR 'postoperative wound infections' OR 'postoperative wound infection'/exp OR 'postoperative wound infection' |
| <b>#3</b> | [2000-2018]/py                                                                                                                                                                                                                                                                                                                                                                                                  |
| <b>#4</b> | #1 AND #2 AND #3                                                                                                                                                                                                                                                                                                                                                                                                |

Supplementary Table 2 : Characteristics of included studies

| <b>Characteristics</b>         | <b>N = 226</b>     |
|--------------------------------|--------------------|
| Year of publication, range     | 2000-2018          |
| %Male, range                   | 0-100 (n = 195)    |
| Mean/median age, range         | 7-74 (n = 186)     |
| %HIV                           | 0-13.1 (n = 2)     |
| %Diabetes                      | 0-95.7 (n = 34)    |
| %Obesity                       | 0-7.4 (n = 18)     |
| Design, n                      |                    |
| - Cross sectional              | 120                |
| - Cohort study                 | 99                 |
| - Case control                 | 7                  |
| WHO regions, n                 |                    |
| - Africa                       | 8                  |
| - Americas                     | 67                 |
| - Eastern Mediterranean        | 23                 |
| - Europe                       | 68                 |
| - Multiregional                | 1                  |
| - South-East Asia              | 16                 |
| - Western Pacific              | 43                 |
| Level of income, n             |                    |
| - Low                          | 9                  |
| - Lower-middle                 | 27                 |
| - Upper-middle                 | 36                 |
| - High                         | 154                |
| Timing of data collection      |                    |
| - Retrospective                | 123                |
| - Prospective                  | 101                |
| - Unclear                      | 2                  |
| Sampling                       |                    |
| - Consecutive                  | 131                |
| - Systematic                   | 37                 |
| - Random                       | 32                 |
| - Exhaustive                   | 11                 |
| - Unclear                      | 15                 |
| Number of sites                |                    |
| - Multisite                    | 51                 |
| - One site                     | 170                |
| - Unclear                      | 5                  |
| Pattern of appendicitis, range |                    |
| - %Catarrhal                   | 0-100 (n = 84)     |
| - %Perforated                  | 0-100 (n = 110)    |
| - %Suppurated                  | 0-100 (n = 70)     |
| - %Gangrenous                  | 0-46.7 (n = 89)    |
| %With administered antibiotics | 24.1-100 (n = 109) |
| %With administered analgesics  | 64.5-100 (n = 20)  |
| %With diet > 6 or 8 hours      | 50-100 (n = 3)     |
| Type of surgery                |                    |
| - %Open surgery                | 0-100 (n = 134)    |

|    |                                  |                   |
|----|----------------------------------|-------------------|
| 1  |                                  |                   |
| 2  |                                  |                   |
| 3  | - %Laparoscopy                   | 0-100 (n = 187)   |
| 4  | Mean/median time to complete the | 0.1-2.2 (n = 106) |
| 5  | intervention (in hours), range   |                   |
| 6  | Type of anesthesia, n            |                   |
| 7  |                                  |                   |
| 8  | - General                        | 118               |
| 9  | - Spinal and general             | 2                 |
| 10 | - Unclear                        | 106               |
| 11 | SSI definition, n                |                   |
| 12 | - CDC-NNIS criteria              | 50                |
| 13 | - Other criteria                 | 25                |
| 14 | - Not reported/Unclear           | 151               |
| 15 |                                  |                   |
| 16 |                                  |                   |
| 17 |                                  |                   |
| 18 |                                  |                   |
| 19 |                                  |                   |
| 20 |                                  |                   |
| 21 |                                  |                   |
| 22 |                                  |                   |
| 23 |                                  |                   |
| 24 |                                  |                   |
| 25 |                                  |                   |
| 26 |                                  |                   |
| 27 |                                  |                   |
| 28 |                                  |                   |
| 29 |                                  |                   |
| 30 |                                  |                   |
| 31 |                                  |                   |
| 32 |                                  |                   |
| 33 |                                  |                   |
| 34 |                                  |                   |
| 35 |                                  |                   |
| 36 |                                  |                   |
| 37 |                                  |                   |
| 38 |                                  |                   |
| 39 |                                  |                   |
| 40 |                                  |                   |
| 41 |                                  |                   |
| 42 |                                  |                   |
| 43 |                                  |                   |
| 44 |                                  |                   |
| 45 |                                  |                   |
| 46 |                                  |                   |
| 47 |                                  |                   |
| 48 |                                  |                   |
| 49 |                                  |                   |
| 50 |                                  |                   |
| 51 |                                  |                   |
| 52 |                                  |                   |
| 53 |                                  |                   |
| 54 |                                  |                   |
| 55 |                                  |                   |
| 56 |                                  |                   |
| 57 |                                  |                   |
| 58 |                                  |                   |
| 59 |                                  |                   |
| 60 |                                  |                   |

For peer review only

Supplementary Table 3. Individual characteristics of included studies

| Author         | Year | Risk of bias | Design          | Country  | Timing               | Sampling method | Sites     | Period    | Population                             | %Male | Mean or median age | %Obesity | Pattern of appendicitis                               | %Catarrhal | %Perforated | %Suppurated | %Gangrenous | % with antibiotic therapy | Type of surgery             | Time to complete the surgery intervention (in hours) | Type of anesthesia | SSI Definition                            | Sample |
|----------------|------|--------------|-----------------|----------|----------------------|-----------------|-----------|-----------|----------------------------------------|-------|--------------------|----------|-------------------------------------------------------|------------|-------------|-------------|-------------|---------------------------|-----------------------------|------------------------------------------------------|--------------------|-------------------------------------------|--------|
| Adejumo        | 2015 | Moderate     | Cohort          | Nigeria  | Retrospective        | Consecutive     | One site  | 2007-2014 | Adults                                 | 39    | 26                 | NR       | Catarrhal, Perforated, Suppurated, Gangrenous         | 48.9       | NR          | NR          | NR          | 100                       | NR                          | NR                                                   | NR                 | NR                                        | 141    |
| Adhikar        | 2008 | Moderate     | Cohort          | Nepal    | Prospective          | Consecutive     | One site  | 2005-2006 | Children, Adolescents, Adults, Elderly | NR    | NR                 | NR       | Unclear                                               | NR         | NR          | NR          | NR          | 100                       | Laparoscopy                 | 0.5                                                  | General            | NR                                        | 50     |
| Aguillo        | 2005 | Moderate     | Cohort          | Spain    | Prospective          | Consecutive     | Unclear   | NR        | Children, Adolescents, Adults, Elderly | 63.1  | NR                 | NR       | Unclear                                               | NR         | NR          | NR          | NR          | 100                       | NR                          | NR                                                   | NR                 | NR                                        | 792    |
| Ahmad          | 2014 | Moderate     | Clinical trial  | Pakistan | Prospective          | Consecutive     | One site  | 2012      | Adults                                 | 35.4  | 27.4               | NR       | Perforated                                            | 0          | 100         | 0           | 0           | 100                       | Open Surgery                | NR                                                   | General            | NR                                        | 158    |
| Ahmed          | 2015 | Moderate     | Cross sectional | Pakistan | Retrospective        | Consecutive     | One site  | 2009-2010 | Children, Adolescents                  | 51.89 | 10.1               | NR       | Unclear                                               | NR         | NR          | NR          | NR          | 100                       | Open Surgery                | NR                                                   | NR                 | NR                                        | 79     |
| Akkoyun        | 2012 | Moderate     | Case control    | Turkey   | Retrospective        | Consecutive     | One site  | 1998-2011 | Children                               | 64.5  | 8.9                | NR       | Perforated                                            | 0          | 100         | 0           | 0           | 100                       | Open Surgery                | 0.6                                                  | General            | NR                                        | 234    |
| Ali            | 2015 | Moderate     | Cross sectional | Pakistan | Prospective          | Consecutive     | One site  | 2014      | Adults                                 | 46.3  | 27.4               | NR       | Unclear                                               | NR         | NR          | NR          | NR          | 100                       | Open Surgery                | NR                                                   | General            | NR                                        | 121    |
| Ali            | 2012 | Moderate     | Cohort          | Nigeria  | Prospective          | Consecutive     | One site  | 2002-2009 | Children, Adolescents, Adults, Elderly | 33.9  | 32                 | NR       | Catarrhal, Perforated, Suppurated, Gangrenous         | NR         | 23.47       | NR          | NR          |                           | Open Surgery                | NR                                                   | NR                 | NR                                        | 1257   |
| Almström       | 2016 | Moderate     | Cohort          | Sweden   | Retrospective        | Systematic      | One site  | 2006-2013 | Children, Adolescents                  | 59.5  | NR                 | NR       | Perforated, Non Perforated 76%                        | NR         | 24          | NR          | NR          |                           | Laparoscopy or Open Surgery | 0.8                                                  | NR                 | NR                                        | 2756   |
| Al-Saadi       | 2006 | Moderate     | Cohort          | Yemen    | Retrospective        | Consecutive     | One site  | 2003-2005 | Children, Adolescents, Adults          | 75    | NR                 | NR       | Catarrhal, Perforated, Suppurated, Gangrenous         | NR         | 60          | NR          | 13          | 100                       | Laparoscopy                 | NR                                                   | NR                 | NR                                        | 160    |
| Al-Temimi      | 2017 | Low          | Cohort          | USA      | Prospective          | Systematic      | One site  | 2016      | Children, Adolescents, Adults, Elderly | 40.2  | 30                 | NR       | Catarrhal, Perforated, Suppurated, Gangrenous, Normal | 73         | 17.4        | 3.3         | 3.3         |                           | Laparoscopy                 | 0.6                                                  | NR                 | NR                                        | 92     |
| Álvarez-Moreno | 2014 | Low          | Cohort          | Colombia | Prospective          | Systematic      | Multisite | 2008-2010 | Children, Adolescents, Adults, Elderly | NR    | NR                 | NR       | Unclear                                               | NR         | NR          | NR          | NR          |                           | NR                          | NR                                                   | NR                 | According to CDC-NNIS diagnostic criteria | 947    |
| Anderson       | 2014 | Moderate     | Cohort          | Sweden   | Retrospective        | Exhaustive      | Multisite | 1992-2008 | Adults                                 | 54    | NR                 | NR       | Perforated, Not perforated                            | NR         | 19.4        | 0           | 0           |                           | Laparoscopy or Open Surgery | NR                                                   | NR                 | NR                                        | 169896 |
| Andert         | 2017 | Moderate     | Cohort          | Germany  | Retrospective        | Consecutive     | One site  | 2003-2014 | Adults                                 | 48.6  | 30.5               | NR       | Catarrhal, Perforated, Suppurated, Gangrenous         | NR         | NR          | NR          | NR          | 100                       | Laparoscopy or Open Surgery | NR                                                   | NR                 | Local signs of inflammation               | 2136   |
| Aranda-Narvaez | 2014 | Moderate     | Cohort          | Spain    | Not reported/Unclear | Not clear       | One site  | 2007-2010 | Adults                                 | 57    | 29                 | NR       | Catarrhal, Perforated, Suppurated, Gangrenous         | 65.8       | NR          | NR          | NR          | 62.00                     | Laparoscopy or Open Surgery | 0.92                                                 | NR                 | According to CDC-NNIS diagnostic Criteria | 868    |
| Aranda-Narváez | 2010 | Low          | Cohort          | Spain    | Retrospective        | Random          | One site  | 1997-2009 | Children, Adolescents, Adults, Elderly | 63.3  | 35                 | NR       | Suppurated, Gangrenous                                | 0          | 0           | 53.3        | 46.7        | 100                       | Laparoscopy or Open Surgery | NR                                                   | General            | According to CDC-NNIS diagnostic Criteria | 30     |

| Author    | Year | Risk of bias | Design          | Country                                             | Timing        | Sampling method | Sites     | Period    | Population                             | %Male | Mean or median age | %Obesity | Pattern of appendicitis                               | %Catarrhal | %Perforated | %Suppurated | %Gangrenous | % with antibiotic therapy | Type of surgery               | Time to complete the surgery intervention (in hours) | Type of anesthesia | SSI Definition                            | Sample |
|-----------|------|--------------|-----------------|-----------------------------------------------------|---------------|-----------------|-----------|-----------|----------------------------------------|-------|--------------------|----------|-------------------------------------------------------|------------|-------------|-------------|-------------|---------------------------|-------------------------------|------------------------------------------------------|--------------------|-------------------------------------------|--------|
| Arthur    | 2017 | Low          | Cross sectional | Australia                                           | Prospective   | Systematic      | Multisite | 2016      | Children, Adolescents, Adults, Elderly | 49.5  | 31.4               | NR       | Unclear                                               | NR         | NR          | NR          | NR          |                           | Laparoscopy or Open Surgery   | 1                                                    | NR                 | NR                                        | 1189   |
| Asefa     | 2014 | Moderate     | Cross sectional | Ethiopia                                            | Retrospective | Consecutive     | One site  | 2006-2010 | Children                               | 62.1  | 10                 | NR       | Catarrhal, Perforated, Suppurated, Gangrenous         | 32.3       | 59.6        | 6.2         | 1.9         |                           | NR                            | NR                                                   | NR                 | NR                                        | 322    |
| Asefa     | 2002 | High         | Cross sectional | Ethiopia                                            | Retrospective | Consecutive     | One site  | 1997-1999 | Adults                                 | 79.5  | 25.6               | NR       | Catarrhal, Perforated                                 | 45.4       | 44          | 0           | 0           |                           | NR                            | NR                                                   | NR                 | NR                                        | 200    |
| Bae       | 2016 | Low          | Cross sectional | Korea                                               | Prospective   | Systematic      | One site  | 2014-2016 | Adults                                 | 52    | 62                 | NR       | Perforated, Suppurated, Gangrenous                    | NR         | 4           | 72          | 24          | 100                       | Laparoscopy                   | 1.2                                                  | General            | According to CDC-NNIS diagnostic criteria | 25     |
| Bae       | 2016 | Moderate     | Cross sectional | USA                                                 | Retrospective | Systematic      | One site  | 2010-2013 | Children, Adolescents, Adults          | NR    | 32                 | NR       | Unclear                                               | NR         | NR          | NR          | NR          | 36.4                      | Laparoscopy                   | NR                                                   | NR                 | According to CDC-NNIS diagnostic criteria | 143    |
| Baek      | 2011 | Moderate     | Cross sectional | Korea                                               | Retrospective | Exhaustive      | One site  | 2007-2009 | Elderly                                | 45.5  | 68.2               | NR       | Catarrhal, Perforated, Suppurated, Gangrenous         | 22.1       | 29.9        | 32.5        | 15.6        | 100                       | Laparoscopy or Open Surgery   | 1.05                                                 | General            | NR                                        | 77     |
| Bali      | 2015 | Moderate     | Cohort          | Turkey                                              | Prospective   | Consecutive     | One site  | 2009-2013 | Adults                                 | 35.7  | 32.33              | NR       | Unclear                                               | NR         | NR          | NR          | NR          |                           | Laparoscopy                   | 1                                                    | NR                 | NR                                        | 126    |
| Banghu    | 2013 | Low          | Cohort          | UK, Spain, Japan, Hong Kong, Australia, New Zealand | Prospective   | Consecutive     | Multisite | 2012      | Children, Adolescents, Adults, Elderly | 51.1  | NR                 | NR       | Unclear                                               | NR         | NR          | NR          | NR          | 96.9                      | Laparoscopy or Open Surgery   | NR                                                   | NR                 | According to CDC-NNIS diagnostic criteria | 3326   |
| Bansal    | 2012 | Low          | Cohort          | Switzerland                                         | Prospective   | Consecutive     | One site  | NR        | Children                               | 62    | 9.8                | NR       | Catarrhal, Perforated                                 | 74.3       | 25.7        | NR          | NR          | 49.2                      | Laparoscopy or Open Surgery   | 1.0                                                  | NR                 | According to CDC-NNIS diagnostic Criteria | 187    |
| Batajoo   | 2012 | Moderate     | Cross sectional | Nepal                                               | Retrospective | Consecutive     | One site  | 2009-2012 | Children, Adolescents, Adults, Elderly | 45.6  | 29.6               | NR       | Unclear                                               | NR         | NR          | NR          | NR          | 100                       | Laparoscopy or Open Surgery   | 0.8                                                  | NR                 | NR                                        | 226    |
| Bharathi  | 2011 | Moderate     | Cohort          | Nepal                                               | Prospective   | Consecutive     | One site  | 2008-2009 | Children, Adolescents, Adults, Elderly | 50    | 22.9               | NR       | Catarrhal, Perforated, Suppurated, Gangrenous         | 80         | NR          | NR          | NR          | 100                       | Laparoscopy with Open Surgery | 0.5                                                  | NR                 | NR                                        | 26     |
| Bıçakcı   | 2011 | High         | Cross sectional | Turkey                                              | Retrospective | Systematic      | Unclear   | 2006-2009 | Children, Adolescents                  | 64.5  | 10                 | NR       | Unclear                                               | NR         | NR          | NR          | NR          |                           | Laparoscopy or Open Surgery   | NR                                                   | NR                 | NR                                        | 279    |
| Bickel    | 2011 | Moderate     | Clinical trial  | Israel                                              | Prospective   | Random          | One site  | 2006-2009 | Adults                                 | 73    | 28                 | NR       | Catarrhal, Gangrenous, Phlegmonous 58.6 , Normal 4.3% | 17         | NR          | NR          | 20.5        | 100                       | Open Surgery                  | 0.5                                                  | General            | NR                                        | 210    |
| Blackwood | 2017 | Moderate     | Cross sectional | USA                                                 | Retrospective | Random          | One site  | 2010-2015 | Children                               | 55.6  | 10.4               | 29.6     | Unclear                                               | NR         | NR          | NR          | NR          |                           | Open Surgery                  | 2                                                    | General            | According to CDC-NNIS diagnostic Criteria | 115    |
| Blakely   | 2011 | Low          | Clinical trial  | USA                                                 | Prospective   | Random          | One site  | 2006-2009 | Children, Adolescents                  | 55.7  | 10.2               | NR       | Perforated                                            | 0          | 100         | 0           | 0           | 100                       | Laparoscopy or Open Surgery   | 1.9                                                  | NR                 | NR                                        | 131    |

| Author            | Year | Risk of bias | Design          | Country      | Timing        | Sampling method | Sites     | Period    | Population                             | %Male | Mean or median age | %Obesity | Pattern of appendicitis                   | %Catarrhal | %Perforated | %Suppurated | %Gangrenous | % with antibiotic therapy | Type of surgery             | Time to complete the surgery intervention (in hours) | Type of anesthesia | SSI Definition                                                 | Sample |
|-------------------|------|--------------|-----------------|--------------|---------------|-----------------|-----------|-----------|----------------------------------------|-------|--------------------|----------|-------------------------------------------|------------|-------------|-------------|-------------|---------------------------|-----------------------------|------------------------------------------------------|--------------------|----------------------------------------------------------------|--------|
| Bonadjo           | 2017 | Moderate     | Cross sectional | USA          | Retrospective | Consecutive     | One site  | 2008-2015 | Children, Adolescents                  | 56.2  | 8.4                | NR       | Perforated                                | 0          | 100         | 0           | 0           | 100                       | Laparoscopy                 | NR                                                   | General            | NR                                                             | 203    |
| Boomer            | 2016 | Low          | Cross sectional | USA          | Retrospective | Systematic      | Multisite | 2010-2012 | Children, Adolescents                  | 60.3  | 11.0               | NR       | Unclear                                   | NR         | NR          | NR          | NR          |                           | Laparoscopy or Open Surgery | NR                                                   | NR                 | According to CDC-NNIS diagnostic criteria                      | 1338   |
| Boomer            | 2014 | Low          | Cohort          | USA          | Retrospective | Consecutive     | One site  | 2010-2012 | Children, Adolescents                  | 61.1  | 10.9               | NR       | Catarrhal, Perforated, Gangrenous         | 66.2       | NR          | NR          | NR          | 97.8                      | Laparoscopy or Open Surgery | NR                                                   | General            | Wound infection or abdominal/pelvic abscess                    | 1388   |
| Bozkurt           | 2014 | Moderate     | Case control    | Turkey       | Retrospective | Consecutive     | One site  | 2008-2012 | Children, Adolescents, Adults, Elderly | 54    | 30.4               | NR       | Catarrhal                                 | 100        | 0           | 0           | 0           |                           | Laparoscopy                 | 0.8                                                  | General            | NR                                                             | 1849   |
| Brandt            | 2008 | Moderate     | Cross sectional | Germany      | Retrospective | Systematic      | Multisite | 2000-2004 | Children, Adolescents, Adults, Elderly | NR    | NR                 | NR       | NR                                        | NR         | NR          | NR          | NR          |                           | NR                          | NR                                                   | NR                 | According to CDC-NNIS diagnostic criteria                      | 10969  |
| Brummer           | 2009 | Moderate     | Cohort          | Germany      | Retrospective | Consecutive     | Multisite | 2004-2007 | Children, Adolescents, Adults, Elderly | NR    | NR                 | NR       | Unclear                                   | NR         | NR          | NR          | NR          |                           | Laparoscopy or Open Surgery | NR                                                   | NR                 | According to CDC-NNIS diagnostic Criteria                      | 14209  |
| Cairo             | 2017 | Moderate     | Cohort          | USA          | Retrospective | Consecutive     | Multisite | 2012-2015 | Children, Adolescents                  | 61.3  | 11.0               | 29.9     | Unclear                                   | NR         | NR          | NR          | NR          |                           | Laparoscopy or Open Surgery | NR                                                   | General            | NR                                                             | 20981  |
| Cameron           | 2017 | Low          | Cohort          | USA          | Retrospective | Systematic      | Multisite | 2012-2015 | Children, Adolescents                  | 60.4  | 11                 | 11.7     | Unclear                                   | NR         | NR          | NR          | NR          | 100                       | Laparoscopy or Open Surgery | NR                                                   | NR                 | According to CDC-NNIS diagnostic criteria                      | 1389   |
| Cao               | 2015 | Moderate     | Cohort          | China        | Retrospective | Consecutive     | Multisite | 2011-2013 | Adults                                 | 54.2  | 37.3               | 12.4     | Unclear                                   | NR         | NR          | NR          | NR          |                           | Laparoscopy or Open Surgery | 0.8                                                  | General            | NR                                                             | 12586  |
| Cervantes-sánchez | 2000 | Low          | Clinical trial  | Mexico       | Prospective   | Random          | One site  | 1994-1995 | Children, Adults                       | 53.4  | 28                 | NR       | Unclear                                   | NR         | NR          | NR          | NR          |                           | Open Surgery                | NR                                                   | General            | Pus or a positive bacteriologic culture from a wound discharge | 350    |
| Chamisa           | 2009 | High         | Cross sectional | South Africa | Retrospective | Exhaustive      | One site  | 2002-2004 | Children, Adolescents, Adults, Elderly | 78.4  | NR                 | NR       | Catarrhal, Perforated, Gangrenous, Normal | 53         | 30.5        | NR          | 10.2        |                           | Laparoscopy or Open Surgery | NR                                                   | NR                 | NR                                                             | 324    |
| Chaudhary         | 2005 | Moderate     | Clinical trial  | Pakistan     | Prospective   | Random          | One site  | 1999-2003 | Children, Adolescents, Adults, Elderly | 45.4  | NR                 | NR       | Catarrhal                                 | NR         | 0           | 0           | 0           |                           | Open Surgery                | NR                                                   | NR                 | NR                                                             | 677    |
| Chen              | 2015 | Moderate     | Cohort          | Taiwan       | Retrospective | Consecutive     | One site  | 2010-2012 | Adults                                 | 43.6  | 42.5               | NR       | Catarrhal, Perforated                     | 87.3       | 12.7        | 0           | 0           |                           | Laparoscopy or Open Surgery | NR                                                   | NR                 | NR                                                             | 236    |
| Chen              | 2012 | High         | Cross sectional | Taiwan       | Prospective   | Consecutive     | One site  | 2010      | Adults                                 | 60    | 38                 | NR       | Unclear                                   | NR         | NR          | NR          | NR          | 73                        | Laparoscopy or Open Surgery | NR                                                   | General            | NR                                                             | 117    |
| Chen              | 2010 | High         | Cross sectional | China        | Prospective   | Systematic      | One site  | 2008-2009 | Adults                                 | NR    | NR                 | NR       | Unclear                                   | NR         | NR          | NR          | NR          |                           | Laparoscopy or Open Surgery | 0.8                                                  | Spinal and General | NR                                                             | 69     |
| Chiang            | 2006 | Moderate     | Cross sectional | Taiwan       | Retrospective | Exhaustive      | One site  | 2002-2004 | Adults                                 | 59.7  | 35                 | NR       | Catarrhal, Perforated                     | 68         | 17          | 0           | 0           | 100                       | Open Surgery                | 1.1                                                  | General            | NR                                                             | 390    |

| Author    | Year | Risk of bias | Design          | Country | Timing        | Sampling method | Sites     | Period    | Population                             | %Male | Mean or median age | %Obesity | Pattern of appendicitis                       | %Catarrhal | %Perforated | %Suppurated | %Gangrenous | % with antibiotic therapy | Type of surgery             | Time to complete the surgery intervention (in hours) | Type of anesthesia | SSI Definition                                                                                                                                                                                                                                  | Sample |
|-----------|------|--------------|-----------------|---------|---------------|-----------------|-----------|-----------|----------------------------------------|-------|--------------------|----------|-----------------------------------------------|------------|-------------|-------------|-------------|---------------------------|-----------------------------|------------------------------------------------------|--------------------|-------------------------------------------------------------------------------------------------------------------------------------------------------------------------------------------------------------------------------------------------|--------|
| Chiang    | 2012 | Moderate     | Cohort          | Taiwan  | Prospective   | Consecutive     | One site  | 2008-2009 | Adults                                 | 58.6  | 37.8               | 10       | Unclear                                       | NR         | NR          | NR          | NR          | 100                       | Open Surgery                | NR                                                   | General            | Presence of gross or purulent discharge at the incision site with or without a positive bacterial culture                                                                                                                                       | 70     |
| Cho       | 2014 | Low          | Cross sectional | Korea   | Prospective   | Consecutive     | One site  | 2011-2012 | Adults                                 | 53    | 38.7               | 18.8     | Unclear                                       | NR         | NR          | NR          | NR          |                           | Laparoscopy                 | NR                                                   | General            | According to CDC-NNIS diagnostic Criteria                                                                                                                                                                                                       | 101    |
| Choudhary | 2014 | Moderate     | Cross sectional | India   | Prospective   | Random          | One site  | 2010-2013 | Adults                                 | 67    | NR                 | NR       | Appendicular mass                             | 0          | 0           | 0           | 0           |                           | NR                          | NR                                                   | NR                 | NR                                                                                                                                                                                                                                              | 92     |
| Clyde     | 2008 | High         | Cross sectional | USA     | Retrospective | Systematic      | One site  | 2002-2007 | Children, Adolescents, Adults, Elderly | 52    | 35                 | NR       | Catarrhal, Perforated, Unclear                | 77         | 14          | 0           | 0           |                           | Laparoscopy or Open Surgery | NR                                                   | NR                 | NR                                                                                                                                                                                                                                              | 1198   |
| Coakley   | 2011 | Low          | Cohort          | USA     | Retrospective | Exhaustive      | One site  | 2005-2010 | Adults                                 | 47.3  | 28.7               | NR       | Catarrhal, Perforated, Suppurated, Gangrenous | 38.3       | 1.2         | 47.1        | 9.8         | 100                       | Laparoscopy or Open Surgery | 1.0                                                  | NR                 | According to CDC-NNIS diagnostic Criteria                                                                                                                                                                                                       | 728    |
| Crandall  | 2009 | High         | Cross sectional | USA     | Retrospective | Not clear       | One site  | 2004-2005 | Adults                                 | 54    | 32.5               | NR       | NR                                            | NR         | 74          | NR          | NR          |                           | Laparoscopy or Open Surgery | 0.9                                                  | General            | NR                                                                                                                                                                                                                                              | 176    |
| Dede      | 2008 | Moderate     | Cohort          | Hungary | Prospective   | Consecutive     | One site  | 2005-2007 | Children, Adolescents, Adults, Elderly | NR    | NR                 | NR       | Unclear                                       | NR         | NR          | NR          | NR          |                           | Laparoscopy or Open Surgery | NR                                                   | NR                 | NR                                                                                                                                                                                                                                              | 273    |
| Dhiman    | 2013 | High         | Cross sectional | USA     | Retrospective | Not clear       | Multisite | 2003-2009 | Adults                                 | 58    | 30.1               | NR       | Unclear                                       | NR         | NR          | NR          | NR          |                           | Laparoscopy or Open Surgery | NR                                                   | General            | NR                                                                                                                                                                                                                                              | 1250   |
| Dimitriou | 2013 | Moderate     | Cohort          | Germany | Retrospective | Consecutive     | One site  | 2007-2010 | Children, Adolescents, Adults, Elderly | 53.5  | 34.9               | NR       | Unclear                                       | NR         | NR          | NR          | NR          |                           | Laparoscopy or Open Surgery | 1                                                    | NR                 | NR                                                                                                                                                                                                                                              | 404    |
| Durkin    | 2015 | Moderate     | Cohort          | USA     | Retrospective | Consecutive     | Multisite | 2007-2012 | Adults                                 | NR    | NR                 | NR       | Unclear                                       | NR         | NR          | NR          | NR          |                           | Laparoscopy                 | NR                                                   | NR                 | NR                                                                                                                                                                                                                                              | 14763  |
| Ein       | 2013 | Moderate     | Cross sectional | Canada  | Retrospective | Consecutive     | One site  | 1969-2003 | Children                               | 70    | 7                  | NR       | Perforated                                    | 0          | 100         | 0           | 0           | 78.8                      | Open Surgery                | NR                                                   | General            | 1.Wound infection=pus draining from between the stitches or staples<br>2.Intra-abdominal abscess=presence of fever, abdominal pain and or gastrointestinal dysfunction and confirmed by radiologic evidence of intra-abdominal fluid collection | 496    |

| Author    | Year | Risk of bias | Design          | Country      | Timing        | Sampling method | Sites     | Period    | Population                             | %Male | Mean or median age | %Obesity | Pattern of appendicitis                       | %Catarrhal | %Perforated | %Suppurated | %Gangrenous | % with antibiotic therapy | Type of surgery             | Time to complete the surgery intervention (in hours) | Type of anesthesia | SSI Definition                                                                                                                                                                                                                                                    | Sample |
|-----------|------|--------------|-----------------|--------------|---------------|-----------------|-----------|-----------|----------------------------------------|-------|--------------------|----------|-----------------------------------------------|------------|-------------|-------------|-------------|---------------------------|-----------------------------|------------------------------------------------------|--------------------|-------------------------------------------------------------------------------------------------------------------------------------------------------------------------------------------------------------------------------------------------------------------|--------|
| Fukuda    | 2016 | Moderate     | Cohort          | Japan        | Retrospective | Consecutive     | Multisite | 2007-2011 | Children, Adolescents, Adults          | 54.4  | 64.5               | NR       | Unclear                                       | NR         | NR          | NR          | NR          |                           | Laparoscopy or Open Surgery | 1.3                                                  | General            | NR                                                                                                                                                                                                                                                                | 2074   |
| Gandaglia | 2014 | Low          | Cohort          | USA          | Prospective   | Consecutive     | Multisite | 2005-2011 | Adolescents, Adults, Elderly           | NR    | NR                 | NR       | Unclear                                       | NR         | NR          | NR          | NR          | 100                       | Laparoscopy or Open Surgery | NR                                                   | General            | According to CDC-NNIS diagnostic Criteria                                                                                                                                                                                                                         | 97780  |
| Garcell   | 2016 | Low          | Cohort          | Cuba         | Prospective   | Consecutive     | One site  | 2013-2015 | Children, Adolescents, Adults, Elderly | 95.3  | 30.7               | 2.1      | Unclear                                       | NR         | NR          | NR          | NR          |                           | Open Surgery                | NR                                                   | NR                 | According to CDC-NNIS diagnostic Criteria                                                                                                                                                                                                                         | 603    |
| Ghnnam    | 2011 | Moderate     | Cross sectional | Saudi Arabia | Retrospective | Not clear       | One site  | 2007-2010 | Adults                                 | 63.4  | 49.0               | NR       | Perforated, Unclear                           | NR         | 38.1        | NR          | NR          |                           | NR                          | NR                                                   | NR                 | NR                                                                                                                                                                                                                                                                | 63     |
| Giesen    | 2017 | Moderate     | Cohort          | Netherlands  | Retrospective | Consecutive     | Multisite | 2014-2015 | Children, Adults                       | 54.3  | 31                 | NR       | Catarrhal, Perforated, Suppurated, Gangrenous | 48.2       | 17.3        | 23.2        | 11.3        | 100                       | Laparoscopy or Open Surgery | 0.52                                                 | NR                 | According to CDC-NNIS diagnostic criteria                                                                                                                                                                                                                         | 637    |
| Giiti     | 2010 | Moderate     | Cross sectional | Tanzania     | Prospective   | Systematic      | One site  | 2008-2009 | Children, Adolescents, Adults, Elderly | 44.7  | 27                 | NR       | Catarrhal, Perforated, Suppurated, Mass       | 87.4       | 7.0         | 1.5         | 0           |                           | NR                          | NR                                                   | NR                 | NR                                                                                                                                                                                                                                                                | 199    |
| Golub     | 2016 | Moderate     | Cohort          | Russia       | Retrospective | Consecutive     | Multisite | 2012      | Adolescents, Adults                    | NR    | 34.8               | NR       | Unclear                                       | NR         | NR          | NR          | NR          | 100                       | Open Surgery                | NR                                                   | General            | NR                                                                                                                                                                                                                                                                | 332    |
| Gross     | 2016 | Moderate     | Cross sectional | USA          | Retrospective | Consecutive     | Multisite | 2012-2013 | Children, Adolescents                  | 60.1  | NR                 | 17.8     | Perforated                                    | 0          | 100         | 0           | 0           |                           | Laparoscopy or Open Surgery | NT                                                   | General            | NR                                                                                                                                                                                                                                                                | 2585   |
| Gurien    | 2016 | Moderate     | Cohort          | USA          | Retrospective | Consecutive     | One site  | 2009-2012 | Children, Adolescents                  | 62    | 10.5               | NR       | Unclear                                       | NR         | NR          | NR          | NR          | 100                       | Laparoscopy or Open Surgery | NR                                                   | General            | Wound infections or intra abdominal abscesses                                                                                                                                                                                                                     | 484    |
| Hamzaoglu | 2004 | Low          | Cross sectional | Turkey       | Prospective   | Consecutive     | One site  | 1999-2001 | Adults                                 | 57    | 46.7               | NR       | Unclear                                       | NR         | NR          | NR          | NR          |                           | Laparoscopy or Open Surgery | NR                                                   | General            | NR                                                                                                                                                                                                                                                                | 100    |
| Harmon    | 2016 | Low          | Cohort          | USA          | Retrospective | Systematic      | One site  | 2007-2012 | Children, Adolescents, Adults, Elderly | 47.4  | 39.7               | NR       | Non perforated                                | 0          | 0           | 0           | 0           |                           | Laparoscopy or Open Surgery | NR                                                   | NR                 | According to CDC-NNIS diagnostic criteria                                                                                                                                                                                                                         | 411    |
| Helling   | 2017 | Low          | Cross sectional | USA          | Retrospective | Systematic      | One site  | 2009-2014 | Adults                                 | 64.3  | 34.4               | NR       | Unclear                                       | NR         | NR          | NR          | NR          | 100                       | Laparoscopy or Open Surgery | NR                                                   | NR                 | According to CDC-NNIS diagnostic criteria                                                                                                                                                                                                                         | 611    |
| Helmer    | 2002 | Low          | Cross sectional | USA          | Retrospective | Systematic      | One site  | 1998-1999 | Children, Adolescents, Adults, Elderly | NR    | NR                 | NR       | Perforated, Non perforated                    | NR         | 19.4        | NR          | NR          | 100                       | NR                          | NR                                                   | NR                 | A surgical wound infection was defined as purulent drainage from the wound, cellulitis requiring antibiotics, or the opening of a closed wound.<br>An intra-abdominal abscess was defined as an intraabdominal fluid collection that contained purulent material. | 438    |
| Hesami    | 2014 | Low          | Clinical trial  | Iran         | Prospective   | Random          | Unclear   | 2010-2011 | Children, Adolescents, Adults          | 58.9  | 27                 | NR       | Unclear                                       | NR         | NR          | NR          | NR          | 100                       | Open Surgery                | NR                                                   | NR                 | 1..wound unfection= Purulent discharge, redness, inflammation, and the need to reooen                                                                                                                                                                             | 90     |



| Author     | Year | Risk of bias | Design          | Country        | Timing        | Sampling method | Sites     | Period    | Population                             | %Male | Mean or median age | %Obesity | Pattern of appendicitis                       | %Catarrhal | %Perforated | %Suppurated | %Gangrenous | % with antibiotic therapy | Type of surgery             | Time to complete the surgery intervention (in hours) | Type of anesthesia | SSI Definition                                                                                                                                                                                            | Sample |
|------------|------|--------------|-----------------|----------------|---------------|-----------------|-----------|-----------|----------------------------------------|-------|--------------------|----------|-----------------------------------------------|------------|-------------|-------------|-------------|---------------------------|-----------------------------|------------------------------------------------------|--------------------|-----------------------------------------------------------------------------------------------------------------------------------------------------------------------------------------------------------|--------|
|            |      |              |                 |                |               |                 |           |           |                                        |       |                    |          |                                               |            |             |             |             |                           |                             |                                                      |                    | the wound<br>2...intra-abdominal abscess=abdominal pain, fullness, fever and confirmed by ecography                                                                                                       |        |
| Hissain    | 2012 | Moderate     | Clinical trial  | Saudi Arabia   | Prospective   | Consecutive     | One site  | 2010-2011 | Adults                                 | NR    | 32.2               | NR       | Catarrhal                                     | 100        | 0           | 0           | 0           | 100                       | Open Surgery                | NR                                                   | NR                 | 1..SSI=Pus discharge from wound needing its opening and drainage<br>2..Intra-abdominal collection=fluid collection inside the peritoneal cavity confirmed by ultrasound or CT scan that required drainage | 377    |
| Horvath    | 2016 | Moderate     | Cross sectional | Germany        | Retrospective | Consecutive     | One site  | 2005-2013 | Adults                                 | 47    | 28.6               | NR       | Perforated, phlegmonous                       | NR         | 52          | NR          | NR          |                           | Laparoscopy or Open Surgery | 1.0                                                  | General            | According to CDC-NNIS diagnostic Criteria                                                                                                                                                                 | 1516   |
| Hughes     | 2013 | Moderate     | Cross sectional | United Kingdom | Retrospective | Systematic      | One site  | 2009-2010 | Adults                                 | 55.6  | 30                 | NR       | Unclear, simple and complicated               | NR         | NR          | NR          | NR          | 100                       | Laparoscopy or Open Surgery | NR                                                   | General            | NR                                                                                                                                                                                                        | 266    |
| Hung       | 2016 | Moderate     | Cross sectional | Vietnam        | Prospective   | Systematic      | Multisite | 2008-2010 | Adults                                 | 45    | 41.6               | NR       | Unclear                                       | NR         | NR          | NR          | NR          |                           | Laparoscopy or Open Surgery | 1                                                    | General            | NR                                                                                                                                                                                                        | 752    |
| Inigo      | 2006 | Low          | Cohort          | Spain          | Prospective   | Consecutive     | One site  | 1998-2002 | Adults                                 | NR    | NR                 | NR       | Unclear                                       | NR         | NR          | NR          | NR          |                           | NR                          | 0.7                                                  | NR                 | According to CDC-NNIS diagnostic Criteria                                                                                                                                                                 | 721    |
| Iqbal      | 2015 | Low          | Clinical trial  | Pakistan       | Prospective   | Random          | One site  | 2011      | Adolescents, Adults, Elderly           | 66.3  | 26                 | NR       | Catarrhal                                     | 100        | 0           | 0           | 0           | 100                       | Open Surgery                | NR                                                   | General            | According to Southampton criteria. Southampton grade 2 and above was considered as surgical site infection.                                                                                               | 166    |
| Javadi     | 2017 | Moderate     | Clinical trial  | Iran           | Prospective   | Random          | One site  | 2016      | Children, Adolescents, Adults          | 65    | 19.3               | NR       | Catarrhal, Suppurated, Gangrenous             | NR         | 0           | NR          | NR          |                           | Open Surgery                | 0.5                                                  | General            | NR                                                                                                                                                                                                        | 69     |
| Jenkins    | 2016 | Low          | Cohort          | USA            | Prospective   | Systematic      | Multisite | 2006-2011 | Children, Adolescents, Adults, Elderly | 51.3  | 40.1               | NR       | Unclear                                       | NR         | NR          | NR          | NR          |                           | Laparoscopy or Open Surgery | NR                                                   | NR                 | According to CDC-NNIS diagnostic criteria                                                                                                                                                                 | 12410  |
| Kang       | 2012 | Moderate     | Case control    | Korea          | Retrospective | Random          | One site  | 2010-2012 | Adults                                 | 54.4  | 31.7               | NR       | Catarrhal, Perforated, Suppurated, Gangrenous | NR         | 5.1         | NR          | NR          | 100                       | Laparoscopy                 | 1.1                                                  | General            | NR                                                                                                                                                                                                        | 217    |
| Kapischke  | 2013 | Low          | Case control    | Germany        | Retrospective | Consecutive     | One site  | 1999-2001 | Children, Adolescents                  | 47.8  | 11.5               | NR       | Catarrhal, Perforated                         | NR         | NR          | NR          | NR          | 100                       | Laparoscopy or Open Surgery | 0.6                                                  | General            | According to CDC-NNIS diagnostic criteria                                                                                                                                                                 | 159    |
| Karam      | 2016 | Moderate     | Cross sectional | USA            | Retrospective | Not clear       | One site  | 2010-2015 | Children                               | 62    | 12                 | NR       | Perforated, Gangrenous                        | NR         | 20.6        | NR          | 6.2         |                           | Laparoscopy                 | NR                                                   | General            | NR                                                                                                                                                                                                        | 625    |
| Karam      | 2016 | Moderate     | Cross sectional | USA            | Retrospective | Consecutive     | One site  | 2010-2015 | Children, Adolescents                  | 63    | NR                 | NR       | Unclear                                       | NR         | NR          | NR          | NR          | 100                       | Laparoscopy                 | 1                                                    | General            | NR                                                                                                                                                                                                        | 101    |
| Kasatpibal | 2005 | Low          | Cross sectional | Thailand       | Prospective   | Systematic      | Multisite | 2003-2004 | Children, Adolescents, Adults, Elderly | 26.6  | 37.2               | NR       | Unclear                                       | NR         | NR          | NR          | NR          | 24.1                      | NR                          | 0.8                                                  | NR                 | According to CDC-NNIS diagnostic criteria                                                                                                                                                                 | 1487   |
| Kasatpibal | 2006 | Moderate     | Cohort          | Thailand       | Prospective   | Not clear       | Multisite | 2003-2004 | Children, Adolescents, Adults, Elderly | 46.9  | 26                 | NR       | Catarrhal                                     | 100        | NR          | NR          | NR          | 92.2                      | Open Surgery                | 0.97                                                 | NR                 | According to CDC-NNIS diagnostic criteria                                                                                                                                                                 | 2139   |

| Author        | Year | Risk of bias | Design          | Country        | Timing        | Sampling method | Sites     | Period    | Population                             | %Male | Mean or median age | %Obesity | Pattern of appendicitis                         | %Catarrhal | %Perforated | %Suppurated | %Gangrenous | % with antibiotic therapy | Type of surgery               | Time to complete the surgery intervention (in hours) | Type of anesthesia | SSI Definition                                                                                                                                       | Sample |
|---------------|------|--------------|-----------------|----------------|---------------|-----------------|-----------|-----------|----------------------------------------|-------|--------------------|----------|-------------------------------------------------|------------|-------------|-------------|-------------|---------------------------|-------------------------------|------------------------------------------------------|--------------------|------------------------------------------------------------------------------------------------------------------------------------------------------|--------|
| Kato          | 2008 | Low          | Cohort          | Japan          | Prospective   | Systematic      | One site  | 2004-2006 | Children                               | NR    | 9.4                | NR       | Perforated, Non perforated 75%                  | NR         | 25          | NR          | NR          | 100                       | Open Surgery                  | NR                                                   | NR                 | NR                                                                                                                                                   | 64     |
| Kell          | 2003 | Moderate     | Cohort          | Ireland        | Prospective   | Consecutive     | Unclear   | NR        | Children, Adolescents, Adults, Elderly | 75.2  | 20.7               | NR       | Unclear                                         | NR         | NR          | NR          | NR          | 100                       | Open Surgery                  | NR                                                   | General            | Defined based on clinical and microbiological criteria                                                                                               | 149    |
| Khan          | 2007 | Low          | Cohort          | United Kingdom | Prospective   | Consecutive     | One site  | 2006      | Children, Adolescents, Adults, Elderly | 47.0  | 24                 | NR       | Catarrhal, Perforated                           | 63.4       | 20.1        | 0           | 0           | 100                       | Laparoscopy or Open Surgery   | 0.9                                                  | General            | According to CDC-NNIS diagnostic Criteria                                                                                                            | 134    |
| Khan          | 2012 | Moderate     | Clinical trial  | Pakistan       | Prospective   | Random          | Multisite | 2006-2009 | Adults                                 | 69    | 33.3               | NR       | Unclear                                         | NR         | NR          | NR          | NR          | 100                       | Open Surgery                  | 0.6                                                  | General            | NR                                                                                                                                                   | 100    |
| Khan          | 2014 | Moderate     | Clinical trial  | Pakistan       | Prospective   | Random          | Multisite | 2013-2014 | Children, Adolescents, Adults, Elderly | 56.7  | 24                 | NR       | Unclear                                         | NR         | NR          | NR          | NR          | 100                       | Laparoscopy or Open Surgery   | NR                                                   | NR                 | Observation of pain, redness, tenderness and purulent discharge                                                                                      | 270    |
| Khiria        | 2011 | Moderate     | Cross sectional | India          | Retrospective | Consecutive     | One site  | 1999-2009 | Adults                                 | 66    | 33.4               | NR       | Perforated, Gangrenous                          | NR         | 14.3        | NR          | 5.2         | 100                       | Laparoscopy or Open Surgery   | 1.2                                                  | General            | Any evidence of infection(erythema, purulent discharge, induration...) and requiring suture removal, antibiotic treatment, or evidence of dehiscence | 497    |
| Kilic         | 2016 | Moderate     | Cross sectional | Turkey         | Retrospective | Consecutive     | One site  | 2004-2010 | Children                               | 62.1  | 9.5                | NR       | Perforated                                      | 0          | 100         | 0           | 0           | 100                       | Open Surgery                  | NR                                                   | NR                 | According to CDC-NNIS diagnostic Criteria                                                                                                            | 110    |
| Kim           | 2015 | Low          | Cross sectional | Korea          | Retrospective | Systematic      | One site  | 2008-2013 | Children, Adolescents, Adults, Elderly | 47.8  | 32.6               | NR       | Perforated, Suppurated, Gangrenous, Normal      | 6          | 13.8        | 64.5        | 7.1         | 100                       | Laparoscopy                   | 0.7                                                  | NR                 | According to CDC-NNIS diagnostic criteria                                                                                                            | 2587   |
| Kim           | 2011 | Moderate     | Cross sectional | USA            | Prospective   | Consecutive     | One site  | 2005-2008 | Elderly                                | 48.1  | 73.4               | NR       | Unclear                                         | NR         | NR          | NR          | NR          | 100                       | Laparoscopy or Open Surgery   | NR                                                   | General            | According to CDC-NNIS diagnostic Criteria                                                                                                            | 3335   |
| Kim           | 2016 | Moderate     | Cohort          | Korea          | Retrospective | Consecutive     | One site  | 2005-2012 | Adults                                 | 59    | NR                 | NR       | Perforated, Gangrenous                          | NR         | NR          | NR          | NR          | 100                       | Laparoscopy or Open Surgery   | 1.9                                                  | General            | NR                                                                                                                                                   | 207    |
| Kiriakopoulos | 2006 | Moderate     | Cross sectional | Greece         | Retrospective | Consecutive     | One site  | 2000-2004 | Adults                                 | 73.8  | 42.3               | NR       | Perforated, Suppurated, Generalized peritonitis | 0          | 61.9        | 9.5         | 0           | 100                       | Laparoscopy with Open Surgery | 1.1                                                  | General            | NRR                                                                                                                                                  | 42     |
| Kirshtein     | 2009 | Moderate     | Cross sectional | Israel         | Retrospective | Consecutive     | One site  | 2000-2007 | Adults                                 | 31.9  | 70.1               | NR       | Unclear                                         | NR         | NR          | NR          | NR          | 100                       | Laparoscopy or Open Surgery   | 0.7                                                  | General            | NR                                                                                                                                                   | 1435   |
| Kiudelis      | 2013 | Moderate     | Cross sectional | Lithuania      | Prospective   | Consecutive     | One site  | 2004-2009 | Adults                                 | 46.3  | 32.3               | NR       | Unclear                                         | NR         | NR          | NR          | NR          | 100                       | Laparoscopy                   | 1.1                                                  | General            | NR                                                                                                                                                   | 152    |
| Kleif         | 2017 | Moderate     | Cross sectional | Denmark        | Retrospective | Not clear       | Multisite | 2012-2014 | Adults                                 | 53    | 47                 | NR       | Suppurated, Gangrenous                          | NR         | NR          | NR          | NR          | 98                        | Laparoscopy or Open Surgery   | NR                                                   | General            | NR                                                                                                                                                   | 1151   |
| Koizumi       | 2014 | Moderate     | Cross sectional | Japan          | Prospective   | Consecutive     | One site  | 2010      | Adults                                 | 57.9  | 39.8               | NR       | Catarrhal, Perforated, Gangrenous, phelmong     | 6.4        | 6.4         | NR          | 25.4        | 100                       | Laparoscopy or Open Surgery   | 0.9                                                  | General            | NR                                                                                                                                                   | 185    |
| Kubota        | 2014 | Low          | Clinical trial  | Japan          | Prospective   | Random          | One site  | 2008-2012 | Children                               | 63.6  | NR                 | NR       | Unclear                                         | NR         | NR          | NR          | NR          | 100                       | Open Surgery                  | NR                                                   | General            | According to CDC-NNIS diagnostic Criteria                                                                                                            | 10     |

| Author   | Year | Risk of bias | Design          | Country  | Timing        | Sampling method | Sites     | Period    | Population                             | %Male | Mean or median age | %Obesity | Pattern of appendicitis                               | %Catarrhal | %Perforated | %Suppurated | %Gangrenous | % with antibiotic therapy | Type of surgery               | Time to complete the surgery intervention (in hours) | Type of anesthesia | SSI Definition                                                                                                                                                                                                    | Sample |
|----------|------|--------------|-----------------|----------|---------------|-----------------|-----------|-----------|----------------------------------------|-------|--------------------|----------|-------------------------------------------------------|------------|-------------|-------------|-------------|---------------------------|-------------------------------|------------------------------------------------------|--------------------|-------------------------------------------------------------------------------------------------------------------------------------------------------------------------------------------------------------------|--------|
| Kumamoto | 2014 | Low          | Cohort          | Japan    | Prospective   | Consecutive     | One site  | 1997-2011 | Adults                                 | 0     | 28                 | NR       | Catarrhal, Gangrenous, Phlegmonous                    | 21.8       | NR          | NR          | 33.4        | 100                       | Open Surgery                  | 0.7                                                  | General            | NR                                                                                                                                                                                                                | 124    |
| Kumar    | 2016 | Moderate     | Cohort          | Nepal    | Prospective   | Consecutive     | One site  | 2015-2016 | Adolescents, Adults                    | 49    | 33.9               | NR       | Catarrhal, Perforated, Suppurated, Gangrenous, Normal | 88.6       | 4.7         | 1.9         | 2.4         |                           | Laparoscopy or Open Surgery   | 0.7                                                  | General            | According to CDC-NNIS diagnostic Criteria                                                                                                                                                                         | 212    |
| Kumar    | 2008 | Moderate     | Cohort          | Pakistan | Prospective   | Consecutive     | One site  | 1997-2000 | Children, Adolescents, Adults, Elderly | NR    | NR                 | NR       | Unclear                                               | NR         | NR          | NR          | NR          | 50                        | Laparoscopy or Open Surgery   | 0.7                                                  | NR                 | NR                                                                                                                                                                                                                | 100    |
| Lacher   | 2012 | Moderate     | Cohort          | USA      | Prospective   | Consecutive     | One site  | 2009-2011 | Children, Adolescents                  | 64.1  | 10.9               | 22.4     | Catarrhal, Perforated                                 | 71.8       | 19          | NR          | NR          | 100                       | Laparoscopy                   | 0.7                                                  | General            | NR                                                                                                                                                                                                                | 415    |
| Le       | 2009 | Moderate     | Cross sectional | USA      | Retrospective | Systematic      | One site  | 1997-2007 | Children, Adolescents, Adults, Elderly | 52.1  | 31.8               | NR       | Catarrhal, Perforated, Gangrenous, Normal Appendix    | 92.9       | 2           | 0           | 2.2         | 86                        | Laparoscopy or Open Surgery   | 0.9                                                  | NR                 | According to CDC-NNIS diagnostic criteria                                                                                                                                                                         | 507    |
| Lee      | 2009 | Low          | Clinical trial  | USA      | Prospective   | Random          | One site  | 2006-2008 | Children, Adolescents, Adults, Elderly | 64.2  | 34.2               | NR       | Catarrhal, Perforated, Suppurated, Gangrenous         | 46.8       | 26.6        | 16.5        | 10.1        | 100                       | Open Surgery                  | NR                                                   | NR                 | Any significant subcutaneous SSI necessitating wound opening or treatment with antibiotics. This also included any subject who was prescribed a separate course of antibiotics after discharge from the hospital. | 109    |
| Lee      | 2010 | Moderate     | Cross sectional | Taiwan   | Prospective   | Consecutive     | One site  | 2006-2008 | Children                               | 58    | 11.1               | NR       | Unclear                                               | NR         | NR          | NR          | NR          |                           | Laparoscopy or Open Surgery   | 2                                                    | General            | NR                                                                                                                                                                                                                | 264    |
| Lee      | 2010 | Moderate     | Cross sectional | Korea    | Retrospective | Consecutive     | One site  | 2008-2009 | Adults                                 | 49.3  | 26.7               | NR       | Perforated, Suppurated                                | 0          | 26.7        | 73.3        | 0           |                           | Laparoscopy                   | 1.0                                                  | General            | NR                                                                                                                                                                                                                | 75     |
| Lee      | 2010 | Moderate     | Cohort          | USA      | Retrospective | Consecutive     | Multisite | 1998-2007 | Children, Adolescents                  | 61.5  | 11                 | NR       | Perforated, Non perforated                            | NR         | 25.7        | NR          | NR          |                           | Laparoscopy or Open Surgery   | NR                                                   | General            | NR                                                                                                                                                                                                                | 2462   |
| Lee      | 2011 | Moderate     | Cohort          | USA      | Retrospective | Systematic      | Multisite | 1998-2007 | Children, Adolescents                  | 61    | 11.6               | NR       | Perforated, Non perforated 70.8%                      | NR         | 29.2        | NR          | NR          |                           | Laparoscopy or Open Surgery   | NR                                                   | NR                 | NR                                                                                                                                                                                                                | 7650   |
| Lemieux  | 2008 | Moderate     | Cohort          | Canada   | Retrospective | Consecutive     | One site  | 1997-2007 | Adults                                 | 0     | 28.8               | NR       | Perforated                                            | NR         | NR          | NR          | NR          |                           | Laparoscopy with Open Surgery | 0.8                                                  | NR                 | NR                                                                                                                                                                                                                | 45     |
| Levy     | 2013 | Moderate     | Cohort          | USA      | Retrospective | Consecutive     | One site  | 2010-2011 | Children                               | NR    | NR                 | NR       | Catarrhal, Perforated, Suppurated, Gangrenous         | 56.4       | 32.7        | 4.2         | 6.7         |                           | Laparoscopy or Open Surgery   | NR                                                   | NR                 | NSQIP criteria                                                                                                                                                                                                    | 312    |

| Author      | Year | Risk of bias | Design          | Country  | Timing        | Sampling method | Sites     | Period    | Population                             | %Male | Mean or median age | %Obesity | Pattern of appendicitis                                         | %Catarrhal | %Perforated | %Suppurated | %Gangrenous | % with antibiotic therapy | Type of surgery             | Time to complete the surgery intervention (in hours) | Type of anesthesia | SSI Definition                                                                                                                       | Sample |
|-------------|------|--------------|-----------------|----------|---------------|-----------------|-----------|-----------|----------------------------------------|-------|--------------------|----------|-----------------------------------------------------------------|------------|-------------|-------------|-------------|---------------------------|-----------------------------|------------------------------------------------------|--------------------|--------------------------------------------------------------------------------------------------------------------------------------|--------|
| Li          | 2005 | Moderate     | Cohort          | China    | Prospective   | Consecutive     | One site  | 2002-2004 | Children, Adolescents                  | 71.3  | 7.9                | NR       | Catarrhal, Suppurated, Gangrenous                               | 11.0       | 0           | 69.4        | 19.7        | 100                       | Laparoscopy or Open Surgery | 0.65                                                 | General            | NR                                                                                                                                   | 160    |
| Li          | 2017 | Moderate     | Cohort          | China    | Retrospective | Consecutive     | One site  | 2005-2016 | Children                               | 58.8  | 5.2                | NR       | Unclear                                                         | NR         | NR          | NR          | NR          |                           | Laparoscopy or Open Surgery | 1                                                    | NR                 | Erythema, swelling and pus at the site of operation                                                                                  | 398    |
| Lim         | 2011 | Low          | Cohort          | Korea    | Retrospective | Consecutive     | One site  | 2009-2011 | Adults                                 | 47.8  | 50.8               | NR       | Perforated, Gangrenous                                          | 0          | 61.6        | NR          | 18.3        | 100                       | Laparoscopy or Open Surgery | 1.3                                                  | General            | Any evidence of infection (e.g., erythema, purulent discharge, induration, etc) requiring suture removal, antibiotics or dehiscence. | 60     |
| Lima        | 2007 | Moderate     | Cross sectional | Spain    | Retrospective | Consecutive     | One site  | 2001-2006 | Children, Adolescents, Adults, Elderly | NR    | NR                 | NR       | Catarrhal, Perforated, Suppurated, Gangrenous                   | 53         | 2           | 26.3        | 9.7         |                           | NR                          | NR                                                   | NR                 | NR                                                                                                                                   | 300    |
| Lin         | 2006 | Moderate     | Cross sectional | Taiwan   | Retrospective | Consecutive     | One site  | 2001-2003 | Adults                                 | 57.6  | 37.5               | NR       | Perforated                                                      | NR         | 100         | NR          | NR          | 100                       | Laparoscopy or Open Surgery | 1.4                                                  | Not described      | NR                                                                                                                                   | 229    |
| Litz        | 2016 | Moderate     | Cohort          | USA      | Retrospective | Consecutive     | One site  | 2012-2015 | Children, Adolescents                  | NR    | 11.4               | 17.7     | Catarrhal, Perforated, Suppurated, Gangrenous, Interval, Normal | 54         | 11.4        | 15.0        | 11.9        |                           | Laparoscopy                 | 0.5                                                  | General            | NR                                                                                                                                   | 413    |
| Liu         | 2017 | High         | Cross sectional | China    | Retrospective | Consecutive     | Unclear   | 2015-2016 | Children                               | 53.6  | 6.6                | NR       | Catarrhal, Suppurated, Gangrenous                               | 34.8       | 0           | 38.4        | 26.8        |                           | Laparoscopy or Open Surgery | 1.0                                                  | General            | NR                                                                                                                                   | 112    |
| Mahmood     | 2016 | Moderate     | Clinical trial  | Pakistan | Prospective   | Random          | One site  | 2012      | Children, Adolescents, Adults          | 55.5  | 22.3               | NR       | Unclear                                                         | NR         | NR          | NR          | NR          | 100                       | Laparoscopy or Open Surgery | NR                                                   | General            | Based on Wound Asepsis Score                                                                                                         | 200    |
| Martinez    | 2012 | Moderate     | Cross sectional | Spain    | Retrospective | Random          | One site  | 2011      | Adults                                 | 60    | 35.8               | NR       | Unclear                                                         | NR         | NR          | NR          | NR          |                           | Laparoscopy or Open Surgery | NR                                                   | General            | NR                                                                                                                                   | 75     |
| Mbah        | 2006 | Moderate     | Cohort          | Nigeria  | Prospective   | Consecutive     | One site  | 2005      | Children, Adolescents, Adults, Elderly | 70    | 25                 | NR       | Unclear                                                         | NR         | NR          | NR          | NR          |                           | Open Surgery                | NR                                                   | General            | NR                                                                                                                                   | 136    |
| Memon       | 2017 | Moderate     | Clinical trial  | Pakistan | Prospective   | Random          | One site  | 2014-2016 | Adults                                 | 53.3  | 26                 | NR       | Catarrhal                                                       | 100        | 0           | 0           | 0           | 100                       | Laparoscopy or Open Surgery | NR                                                   | NR                 | NR                                                                                                                                   | 227    |
| Menezes     | 2008 | Moderate     | Cross sectional | Ireland  | Retrospective | Consecutive     | One site  | 2000-2006 | Children, Adolescents                  | 62.7  | 10.5               | NR       | Perforated, Gangrenous                                          | 0          | 81.4        | 0           | 17.8        |                           | Laparoscopy or Open Surgery | NR                                                   | NR                 | NR                                                                                                                                   | 118    |
| Merenda     | 2013 | Moderate     | Cross sectional | Poland   | Retrospective | Consecutive     | One site  | 2006-2012 | Children, Adolescents, Adults, Elderly | NR    | NR                 | NR       | Unclear                                                         | NR         | NR          | NR          | NR          |                           | Laparoscopy or Open Surgery | NR                                                   | NR                 | NR                                                                                                                                   | 317    |
| Michailidou | 2015 | Low          | Cross sectional | USA      | Retrospective | Systematic      | One site  | 2007-2013 | Children, Adolescents                  | 56.1  | 9.6                | NR       | Perforated, Negative appendectomy                               | NR         | 26.5        | NR          | NR          |                           | Laparoscopy or Open Surgery | 1.3                                                  | NR                 | According to CDC-NNIS diagnostic criteria                                                                                            | 264    |
| Michailidou | 2015 | Moderate     | Cross sectional | USA      | Retrospective | Consecutive     | Multisite | 2012      | Children, Adolescents                  | 60.1  | 11.2               | 22.5     | Catarrhal, Perforated, Suppurated, Gangrenous                   | NR         | NR          | NR          | NR          | 100                       | Laparoscopy                 | 0                                                    | General            | NR                                                                                                                                   | 2812   |

| Author       | Year | Risk of bias | Design          | Country        | Timing        | Sampling method | Sites     | Period    | Population                             | %Male | Mean or median age | %Obesity | Pattern of appendicitis                       | %Catarrhal | %Perforated | %Suppurated | %Gangrenous | % with antibiotic therapy | Type of surgery               | Time to complete the surgery intervention (in hours) | Type of anesthesia | SSI Definition                                                     | Sample |
|--------------|------|--------------|-----------------|----------------|---------------|-----------------|-----------|-----------|----------------------------------------|-------|--------------------|----------|-----------------------------------------------|------------|-------------|-------------|-------------|---------------------------|-------------------------------|------------------------------------------------------|--------------------|--------------------------------------------------------------------|--------|
| Mickovic     | 2015 | Moderate     | Cross sectional | Serbia         | Retrospective | Not clear       | One site  | 2010      | Children                               | 46.4  | 11.7               | NR       | Catarrhal, Perforated, Gangrenous             | 45.9       | 2.2         | NR          | 19.5        | 100                       | Laparoscopy or Open Surgery   | 0.7                                                  | General            | NR                                                                 | 218    |
| Ming         | 2009 | Moderate     | Cross sectional | China          | Retrospective | Consecutive     | One site  | 2003-2005 | Adults                                 | 57.2  | 48.8               | NR       | Perforated, Gangrenous, Appendicular abscess  | NR         | 72.3        | NR          | 38.2        | 100                       | Laparoscopy or Open Surgery   | NR                                                   | General            | NR                                                                 | 173    |
| Mingmalairak | 2009 | Low          | Clinical trial  | Thailand       | Prospective   | Random          | One site  | 2006-2007 | Adults                                 | 61    | 29.5               | 0        | Catarrhal, Perforated, Suppurated, Gangrenous | 24         | 16          | 52          | 8.0         | 100                       | Open Surgery                  | 43                                                   | General            | NR                                                                 | 100    |
| Miyano       | 2010 | Low          | Cohort          | Japan          | Prospective   | Consecutive     | One site  | 2004-2008 | Children, Adolescents                  | 56.5  | 7.7                | NR       | Peritonitis complicating appendicitis         | 0          | 100         | 0           | 0           | 100                       | Laparoscopy or Open Surgery   | 1.9                                                  | General            | NR                                                                 | 23     |
| Moazzez      | 2013 | Low          | Cohort          | USA            | Retrospective | Not clear       | One site  | 2005-2009 | Elderly                                | 49.3  | 74                 | NR       | Unclear                                       | NR         | NR          | NR          | NR          |                           | Laparoscopy or Open Surgery   | NR                                                   | General            | NR                                                                 | 2060   |
| Monge Jodra  | 2003 | Moderate     | Cohort          | Spain          | Prospective   | Consecutive     | Multisite | 1997-2000 | Children, Adolescents, Adults, Elderly | NR    | NR                 | NR       | Unclear                                       | NR         | NR          | NR          | NR          |                           | NR                            | NR                                                   | NR                 | According to CDC-NNIS diagnostic Criteria                          | 5780   |
| Mueck        | 2017 | Moderate     | Cohort          | USA            | Prospective   | Consecutive     | One site  | 2012-2015 | Children, Adolescents                  | 62.5  | 11.0               | NR       | Catarrhal, Suppurated                         | NR         | NR          | NR          | NR          | 95                        | Laparoscopy with Open Surgery | NR                                                   | General            | NR                                                                 | 697    |
| Muensterer   | 2011 | Low          | Cohort          | USA            | Prospective   | Consecutive     | One site  | 2009-2010 | Children, Adolescents                  | NR    | 11.2               | NR       | Catarrhal, Perforated                         | 78.1       | 10.4        | 0           | 0           | 100                       | Laparoscopy                   | 0.6                                                  | General            | Infected umbilicus requiring antibiotics, or incision and drainage | 183    |
| Muensterer   | 2009 | Moderate     | Cross sectional | USA            | Prospective   | Consecutive     | One site  | 2009      | Children                               | 61.3  | 11                 | NR       | Perforated                                    | NR         | 21.4        | NR          | NR          |                           | Laparoscopy                   | 0.73                                                 | General            | NR                                                                 | 75     |
| Mustafa      | 2016 | Low          | Clinical trial  | Pakistan       | Prospective   | Random          | One site  | 2015-2016 | Adults                                 | 52.9  | 26.6               | NR       | Perforated                                    | 0          | 100         | 0           | 0           | 100                       | Open Surgery                  | NR                                                   | NR                 | Redness around the wound, serosanguinous discharge, fever > 100°F  | 68     |
| Nadler       | 2003 | High         | Cross sectional | USA            | Retrospective | Systematic      | One site  | 1998-2001 | Children                               | 62.2  | 9.35               | NR       | Perforated                                    | NR         | 100         | NR          | NR          | 100                       | Open Surgery                  | NR                                                   | General            | NR                                                                 | 94     |
| Nataraja     | 2010 | Moderate     | Cohort          | United Kingdom | Retrospective | Consecutive     | One site  | 2008-2010 | Children, Adolescents                  | 59.1  | 11                 | NR       | Catarrhal, Perforated, Suppurated             | NR         | NR          | NR          | NR          |                           | Laparoscopy or Open Surgery   | NR                                                   | General            | NR                                                                 | 191    |
| Nataraja     | 2012 | Moderate     | Case control    | United Kingdom | Retrospective | Consecutive     | Multisite | 2003-2010 | Children, Adolescents                  | 58.2  | 11.3               | NR       | Catarrhal, Perforated, Suppurated, Gangrenous | NR         | NR          | NR          | NR          |                           | Laparoscopy or Open Surgery   | NR                                                   | General            | Post op intra abdominal abscess                                    | 1205   |
| Obayashi     | 2015 | Moderate     | Cross sectional | Japan          | Retrospective | Consecutive     | One site  | 2006-2014 | Children, Adolescents                  | 60    | 11                 | NR       | Unclear                                       | NR         | NR          | NR          | NR          |                           | Laparoscopy or Open Surgery   | NR                                                   | NR                 | NR                                                                 | 485    |
| Obinwa       | 2015 | Moderate     | Cohort          | Ireland        | Retrospective | Consecutive     | One site  | 1995-2008 | Children                               | 54.5  | 9.6                | NR       | Catarrhal, Perforated, Suppurated, Gangrenous | 62.7       | NR          | NR          | 4.2         | 100                       | NR                            | NR                                                   | NR                 | NR                                                                 | 1037   |
| Ohene        | 2006 | Moderate     | Cross sectional | Ghana          | Prospective   | Consecutive     | One site  | 1998-2004 | Adults                                 | 63.9  | 32.4               | NR       | Unclear                                       | NR         | NR          | NR          | NR          | 100                       | Open Surgery                  | NR                                                   | General            | NR                                                                 | 638    |
| Okkyung      | 2002 | Moderate     | Clinical trial  | Korea          | Prospective   | Random          | One site  | 2002      | Children, Adolescents, Adults, Elderly | 54.7  | 30.5               | NR       | Catarrhal, Suppurated, Gangrenous             | NR         | 0           | 50          | 27.3        | 100                       | Open Surgery                  | NR                                                   | General            | NR                                                                 | 84     |

| Author          | Year | Risk of bias | Design          | Country      | Timing        | Sampling method | Sites     | Period    | Population                             | %Male | Mean or median age | %Obesity | Pattern of appendicitis                            | %Catarrhal | %Perforated | %Suppurated | %Gangrenous | % with antibiotic therapy | Type of surgery               | Time to complete the surgery intervention (in hours) | Type of anesthesia | SSI Definition                            | Sample |
|-----------------|------|--------------|-----------------|--------------|---------------|-----------------|-----------|-----------|----------------------------------------|-------|--------------------|----------|----------------------------------------------------|------------|-------------|-------------|-------------|---------------------------|-------------------------------|------------------------------------------------------|--------------------|-------------------------------------------|--------|
| Onieva          | 2017 | Moderate     | Cross sectional | Spain        | Retrospective | Consecutive     | One site  | 2012-2014 | Children, Adolescents, Adults, Elderly | 53.7  | 32                 | NR       | Unclear                                            | NR         | NR          | NR          | NR          |                           | Laparoscopy or Open Surgery   | NR                                                   | NR                 | NR                                        | 294    |
| Page            | 2010 | Moderate     | Cross sectional | USA          | Retrospective | Exhaustive      | Multisite | 2008      | Adults                                 | 51.4  | 39.2               | NR       | Unclear                                            | NR         | NR          | NR          | NR          |                           | Laparoscopy or Open Surgery   | 0.94                                                 | General            | NR                                        | 17199  |
| Palesty         | 2004 | Moderate     | Cross sectional | USA          | Retrospective | Consecutive     | One site  | 2000-2002 | Adults                                 | 47    | 25.2               | NR       | Unclear                                            | NR         | NR          | NR          | NR          | 100                       | Laparoscopy                   | 1.2                                                  | General            | NR                                        | 50     |
| Pandit          | 2016 | High         | Cohort          | Nepal        | Retrospective | Consecutive     | Multisite | 2009-2014 | Children, Adolescents, Adults          | 51    | 24.3               | NR       | Perforated, Suppurated                             | NR         | 2.6         | 97.4        | 0           |                           | Open Surgery                  | 0.6                                                  | Spinal and General | NR                                        | 101    |
| Parcells        | 2009 | Low          | Cohort          | USA          | Retrospective | Systematic      | One site  | 1997-2007 | Adults                                 | NR    | 39.3               | NR       | Perforated, Not perforated                         | NR         | 33.1        | NR          | NR          |                           | Laparoscopy or Open Surgery   | NR                                                   | NR                 | According to CDC-NNIS diagnostic criteria | 1063   |
| Park            | 2017 | Low          | Cohort          | Korea        | Prospective   | Systematic      | One site  | 2012-2014 | Adults                                 | 53.3  | 37.45              | NR       | Perforated, Gangrenous                             | NR         | 38.7        | NR          | 45.9        |                           | Laparoscopy                   | 1.1                                                  | General            | According to CDC-NNIS diagnostic Criteria | 1343   |
| Park            | 2018 | Moderate     | Cohort          | Korea        | Retrospective | Consecutive     | One site  | 2009-2013 | Adults                                 | 53.7  | 34.2               | NR       | Perforated                                         | NR         | 13.2        | NR          | NR          |                           | Laparoscopy with Open Surgery | 1.1                                                  | General            | NR                                        | 986    |
| Pascual         | 2017 | Moderate     | Cohort          | Spain        | Prospective   | Consecutive     | One site  | 2013-2017 | Adults                                 | 49    | 41                 | NR       | Unclear                                            | NR         | NR          | NR          | NR          |                           | Laparoscopy                   | 0.1                                                  | General            | NR                                        | 100    |
| Patel           | 2003 | High         | Cohort          | Kenya        | Retrospective | Consecutive     | One site  | 1996-2002 | Children, Adolescents, Adults          | 30.2  | 30.6               | NR       | Catarrhal, Suppurated, Gangrenous, Carcinoid tumor | 94.3       | 0           | 0.9         | 2.8         | 100                       | Laparoscopy with Open Surgery | 1.5                                                  | General            | NR                                        | 106    |
| Pearcy          | 2017 | Moderate     | Case control    | USA          | Retrospective | Random          | Multisite | 2010-2014 | Adults                                 | 54    | 36                 | NR       | Unclear                                            | NR         | NR          | NR          | NR          |                           | NR                            | 1.1                                                  | NR                 | NR                                        | 2903   |
| Pishori         | 2003 | Low          | Cross sectional | Pakistan     | Prospective   | Systematic      | One site  | 1997-1999 | Children, Adolescents, Adults, Elderly | NR    | NR                 | NR       | Unclear                                            | NR         | NR          | NR          | NR          |                           | NR                            | NR                                                   | NR                 | According to CDC-NNIS diagnostic criteria | 3304   |
| Putnam          | 2016 | Moderate     | Cross sectional | USA          | Prospective   | Consecutive     | One site  | 2012-2015 | Children, Adolescents                  | 61    | 9.4                | NR       | Perforated, Suppurated, Gangrenous                 | 0          | 100         | 0           | 0           | 100                       | Laparoscopy or Open Surgery   | 0.9                                                  | General            | NR                                        | 410    |
| Qahtani         | 2014 | Moderate     | Cohort          | Saudi Arabia | Prospective   | Random          | One site  | 2012      | Adolescents, Adults                    | 68    | 23.6               | NR       | Catarrhal, Perforated, Gangrenous                  | 9.6        | 19.9        | NR          | 22.4        | 100                       | Open Surgery                  | 1.5                                                  | General            | NR                                        | 91     |
| Quezada         | 2015 | Moderate     | Cohort          | Chile        | Retrospective | Consecutive     | One site  | 2003-2013 | Adults                                 | 43    | 39                 | NR       | Unclear                                            | NR         | NR          | NR          | NR          |                           | Laparoscopy or Open Surgery   | 2.2                                                  | NR                 | NR                                        | 227    |
| Raakow          | 2014 | High         | Cohort          | Germany      | Prospective   | Not clear       | One site  | 2009-2013 | Adolescents, Adults                    | 28.8  | 27.2               | NR       | Catarrhal, Suppurated, Gangrenous                  | 12.8       | 0           | 16          | 4           |                           | Laparoscopy                   | 0.8                                                  | General            | NR                                        | 156    |
| Rafiq           | 2015 | Low          | Clinical trial  | Pakistan     | Prospective   | Random          | One site  | 2012-2014 | Adolescents, Adults, Elderly           | 48.5  | 22.6               | 0        | Unclear                                            | NR         | NR          | NR          | NR          | 100                       | Open Surgery                  | 0.7                                                  | General            | NR                                        | 390    |
| Rajabi-Mashhadi | 2012 | Moderate     | Clinical trial  | Iran         | Prospective   | Random          | One site  | 2006-2007 | Adults                                 | 62.5  | 26.2               | NR       | Unclear, Non perforated                            | NR         | NA          | NR          | NR          | 100                       | Open Surgery                  | NR                                                   | NR                 | NR                                        | 291    |



| Author        | Year | Risk of bias | Design          | Country     | Timing               | Sampling method | Sites     | Period    | Population                             | %Male | Mean or median age | %Obesity | Pattern of appendicitis                       | %Catarrhal | %Perforated | %Suppurated | %Gangrenous | % with antibiotic therapy | Type of surgery               | Time to complete the surgery intervention (in hours) | Type of anesthesia | SSI Definition                                                                                                                                                                                                                                                                                                                                                  | Sample |
|---------------|------|--------------|-----------------|-------------|----------------------|-----------------|-----------|-----------|----------------------------------------|-------|--------------------|----------|-----------------------------------------------|------------|-------------|-------------|-------------|---------------------------|-------------------------------|------------------------------------------------------|--------------------|-----------------------------------------------------------------------------------------------------------------------------------------------------------------------------------------------------------------------------------------------------------------------------------------------------------------------------------------------------------------|--------|
| Reinisch      | 2017 | Moderate     | Cross sectional | Germany     | Retrospective        | Consecutive     | One site  | 2008-2015 | Adults                                 | 56    | 32                 | NR       | Unclear                                       | NR         | NR          | NR          | NR          | 100                       | Laparoscopy with Open Surgery | NR                                                   | General            | NR                                                                                                                                                                                                                                                                                                                                                              | 680    |
| Rios          | 2004 | High         | Cross sectional | Peru        | Not reported/Unclear | Consecutive     | One site  | 2001-2002 | Children, Adolescents, Adults, Elderly | NR    | 30.6               | NR       | Catarrhal, Perforated, Suppurated, Gangrenous | 15.38      | 16.35       | 44.23       | 24.04       | 100                       | NR                            | 0.98                                                 | Unclear            | NR                                                                                                                                                                                                                                                                                                                                                              | 104    |
| Romano        | 2014 | Moderate     | Cross sectional | USA         | Retrospective        | Systematic      | One site  | 2010-2012 | Adults                                 | 66    | 35.7               | NR       | Gangrenous                                    | NR         | NR          | NR          | 9.7         | 86                        | Laparoscopy                   | NR                                                   | General            | NR                                                                                                                                                                                                                                                                                                                                                              | 372    |
| Romel Hilaire | 2014 | Moderate     | Cross sectional | Cuba        | Retrospective        | Consecutive     | One site  | 2007-2009 | Adults                                 | 100   | NR                 | NR       | Suppurated                                    | 0          | 0           | 100         | 0           |                           | Laparoscopy or Open Surgery   | NR                                                   | NR                 | NR                                                                                                                                                                                                                                                                                                                                                              | 720    |
| Romeo         | 2009 | Moderate     | Cross sectional | Colombia    | Retrospective        | Consecutive     | One site  | 1997      | Children, Adolescents, Adults, Elderly | NR    | NR                 | NR       | Unclear                                       | NR         | NR          | NR          | NR          |                           | Laparoscopy                   | NR                                                   | NR                 | NR                                                                                                                                                                                                                                                                                                                                                              | 310    |
| Romy          | 2008 | Low          | Cross sectional | Switzerland | Prospective          | Systematic      | Multisite | 1998-2004 | Children, Adolescents, Adults, Elderly | 53.9  | 32.7               | NR       | Unclear                                       | NR         | NR          | NR          | NR          | 59.5                      | Laparoscopy or Open Surgery   | NR                                                   | NR                 | According to CDC-NNIS diagnostic criteria                                                                                                                                                                                                                                                                                                                       | 2468   |
| Rooh-ul-Muqim | 2010 | Moderate     | Cohort          | Pakistan    | Prospective          | Consecutive     | One site  | 2008-2009 | Adolescents, Adults, Elderly           | 48.5  | 24                 | NR       | Catarrhal, Perforated, Suppurated, Gangrenous | NR         | NR          | NR          | NR          | 100                       | Laparoscopy or Open Surgery   | 0.5                                                  | General            | NR                                                                                                                                                                                                                                                                                                                                                              | 165    |
| Rossem        | 2015 | Moderate     | Cohort          | Netherlands | Prospective          | Consecutive     | Multisite | 2014      | Adults                                 | 47.5  | 44                 | NR       | Perforated, Gangrenous                        | NR         | 68          | 10.4        | 21.7        | 100                       | Laparoscopy with Open Surgery | 0.9                                                  | General            | NR                                                                                                                                                                                                                                                                                                                                                              | 415    |
| Rossem        | 2016 | Low          | Cohort          | Netherlands | Prospective          | Not clear       | Multisite | 2014      | Children, Adolescents, Adults          | 46.2  | 28.0               | NR       | Unclear                                       | NR         | NR          | NR          | NR          |                           | Laparoscopy                   | 0.8                                                  | General            | Superficial surgical site infection: recorded when administration of antibiotics, opening of the incision or both was necessary. An intra-abdominal abscess was defined as a postoperative intra-abdominal fluid collection diagnosed by cross-sectional imaging for which administration of antibiotics or a radiological or surgical intervention was needed. | 1995   |
| Rotermann     | 2004 | Moderate     | Cohort          | Canada      | Retrospective        | Consecutive     | Multisite | 1997-2000 | Children, Adolescents, Adults, Elderly | 55.2  | NR                 | NR       | Unclear                                       | NR         | NR          | NR          | NR          |                           | NR                            | NR                                                   | NR                 | According to CDC-NNIS diagnostic criteria                                                                                                                                                                                                                                                                                                                       | 80867  |

| Author          | Year | Risk of bias | Design          | Country     | Timing        | Sampling method | Sites     | Period    | Population                             | %Male | Mean or median age | %Obesity | Pattern of appendicitis                       | %Catarrhal | %Perforated | %Suppurated | %Gangrenous | % with antibiotic therapy | Type of surgery             | Time to complete the surgery intervention (in hours) | Type of anesthesia | SSI Definition                                                                                                                                                                                                                                                                                                                                | Sample |
|-----------------|------|--------------|-----------------|-------------|---------------|-----------------|-----------|-----------|----------------------------------------|-------|--------------------|----------|-----------------------------------------------|------------|-------------|-------------|-------------|---------------------------|-----------------------------|------------------------------------------------------|--------------------|-----------------------------------------------------------------------------------------------------------------------------------------------------------------------------------------------------------------------------------------------------------------------------------------------------------------------------------------------|--------|
| Saar            | 2016 | Low          | Cross sectional | Estonia     | Prospective   | Consecutive     | One site  | 2013-2014 | Adults                                 | 48.9  | 35.4               | NR       | Perforated, Gangrenous                        | NR         | 15.4        | NR          | 59.4        | 95.1                      | Laparoscopy or Open Surgery | 0.7                                                  | General            | According to CDC-NNIS diagnostic Criteria                                                                                                                                                                                                                                                                                                     | 266    |
| Saber           | 2010 | Moderate     | Clinical trial  | USA         | Prospective   | Consecutive     | One site  | 2008-2009 | Adults                                 | 42.3  | 33                 | NR       | Catarrhal                                     | 100        | 0           | 0           | 0           |                           | Laparoscopy                 | 0.8                                                  | NR                 | NR                                                                                                                                                                                                                                                                                                                                            | 26     |
| Sadraei-Mosavi  | 2017 | Moderate     | Clinical trial  | Iran        | Prospective   | Random          | One site  | 2013-2014 | Adults                                 | NR    | 28.4               | NR       | Catarrhal                                     | 100        | 0           | 0           | 0           | 100                       | Open Surgery                | NR                                                   | NR                 | SSI=pus discharge from wound, redness, tenderness, edema                                                                                                                                                                                                                                                                                      | 152    |
| Saha            | 2010 | Moderate     | Cohort          | Bangladesh  | Prospective   | Consecutive     | One site  | 2007-2008 | Children                               | NR    | NR                 | NR       | Unclear                                       | NR         | NR          | NR          | NR          | 100                       | Laparoscopy or Open Surgery | NR                                                   | NR                 | NR                                                                                                                                                                                                                                                                                                                                            | 60     |
| Sahm            | 2010 | Moderate     | Cross sectional | Germany     | Prospective   | Systematic      | One site  | 1998-2006 | Adults                                 | 54    | 39                 | NR       | Catarrhal, Perforated, Gangrenous             | 50.7       | 17.0        | NR          | 6.9         | 100                       | Laparoscopy or Open Surgery | 1.0                                                  | General            | NR                                                                                                                                                                                                                                                                                                                                            | 1710   |
| Sahm            | 2015 | Moderate     | Cross sectional | Germany     | Prospective   | Exhaustive      | Multisite | 1988-2009 | Children, Adolescents, Adults, Elderly | 43    | 31                 | NR       | Perforated, Non Perforated                    | 91.5       | NR          | 8.5         | NR          | NR                        | Laparoscopy or Open Surgery | NR                                                   | NR                 | NR                                                                                                                                                                                                                                                                                                                                            | 12570  |
| Saló            | 2016 | High         | Cohort          | Sweden      | Retrospective | Consecutive     | One site  | 2006-2014 | Children                               | 55.6  | 10.4               | NR       | Perforated, Gangrenous, Phlegmonous           | NR         | 7.3         | NR          | 11.6        | 100                       | Laparoscopy                 | 0.94                                                 | NR                 | NR                                                                                                                                                                                                                                                                                                                                            | 259    |
| Sanchez-Santana | 2017 | Low          | Cohort          | Spain       | Prospective   | Consecutive     | One site  | 2007-2015 | Adults                                 | 55.2  | 32.9               | 2.6      | Unclear                                       | NR         | NR          | NR          | NR          | 71.3                      | Laparoscopy or Open Surgery | NR                                                   | NR                 | According to CDC-NNIS diagnostic criteria                                                                                                                                                                                                                                                                                                     | 930    |
| Sauvain         | 2016 | Moderate     | Cohort          | Switzerland | Retrospective | Consecutive     | Multisite | 2007-2011 | Adults                                 | 53.2  | 34                 | NR       | Catarrhal, Perforated, Suppurated, Gangrenous | NR         | 19          | NR          | NR          |                           | Laparoscopy or Open Surgery | NR                                                   | NR                 | NR                                                                                                                                                                                                                                                                                                                                            | 2559   |
| Scarborough     | 2012 | Low          | Cross sectional | USA         | Retrospective | Systematic      | Multisite | 2005-2009 | Children, Adolescents, Adults, Elderly | 52    | 38.9               | NR       | Perforated, Non rupture                       | NR         | 11.2        | NR          | NR          |                           | Laparoscopy or Open Surgery | 0.9                                                  | NR                 | According to CDC-NNIS diagnostic criteria                                                                                                                                                                                                                                                                                                     | 39122  |
| Scarless        | 2013 | Moderate     | Clinical trial  | Scotland    | Prospective   | Random          | One site  | 2011      | Adults                                 | 53    | 32                 | NR       | Unclear                                       | NR         | NR          | NR          | NR          |                           | Laparoscopy                 | 1.4                                                  | General            | NR                                                                                                                                                                                                                                                                                                                                            | 38     |
| Seifarth        | 2016 | Moderate     | Cohort          | USA         | Retrospective | Consecutive     | Multisite | 2007-2012 | Children, Adults                       | 60    | 12                 | NR       | Catarrhal                                     | 100        | 0           | 0           | 0           |                           | Laparoscopy                 | NR                                                   | General            | NR                                                                                                                                                                                                                                                                                                                                            | 1283   |
| Seifarth        | 2016 | Low          | Cohort          | USA         | Retrospective | Consecutive     | Multisite | 2007-2012 | Children, Adolescents, Adults          | 60    | 12                 | NR       | Perforated, Suppurated, Gangrenous            | 100        | 0           | 0           | 0           |                           | Laparoscopy                 | NR                                                   | NR                 | NR                                                                                                                                                                                                                                                                                                                                            | 1283   |
| Senekjan        | 2013 | Moderate     | Cohort          | USA         | Retrospective | Consecutive     | Multisite | 2005-2009 | Adolescents                            | 56.5  | 40.3               | NR       | Unclear                                       | NR         | NR          | NR          | NR          |                           | Laparoscopy or Open Surgery | 0.9                                                  | NR                 | 1) SSI (superficial and deep incisional)...infection within 30 days of operation and involved skin, subcutaneous tissue or deep soft tissue<br>2) Organ space infection (OSI)...infection within 30 days of operation when the infection appeared to be related to the operation and involved any part of the anatomy other than the incision | 61830  |



| Author          | Year | Risk of bias | Design          | Country     | Timing        | Sampling method | Sites     | Period    | Population                             | %Male | Mean or median age | %Obesity | Pattern of appendicitis                                      | %Catarrhal | %Perforated | %Suppurated | %Gangrenous | % with antibiotic therapy | Type of surgery               | Time to complete the surgery intervention (in hours) | Type of anesthesia | SSI Definition                            | Sample |
|-----------------|------|--------------|-----------------|-------------|---------------|-----------------|-----------|-----------|----------------------------------------|-------|--------------------|----------|--------------------------------------------------------------|------------|-------------|-------------|-------------|---------------------------|-------------------------------|------------------------------------------------------|--------------------|-------------------------------------------|--------|
| Seo             | 2002 | Moderate     | Cross sectional | Korea       | Retrospective | Systematic      | One site  | 2000      | Adults                                 | 0     | NR                 | NR       | Catarrhal, Perforated, Suppurated, Gangrenous                | 14.7       | 15.6        | 49.5        | 20.2        |                           | NR                            | NR                                                   | NR                 | NR                                        | 129    |
| Sesia           | 2011 | Moderate     | Cohort          | Germany     | Prospective   | Consecutive     | One site  | 2006-2008 | Children, Adolescents, Adults, Elderly | NR    | NR                 | NR       | Unclear                                                      | NR         | NR          | NR          | NR          | 100                       | Laparoscopy or Open Surgery   | 1                                                    | NR                 | NR                                        | 265    |
| Shaikg          | 2011 | Moderate     | Cross sectional | Pakistan    | Prospective   | Consecutive     | One site  | 2007-2009 | Adults                                 | 51.4  | 29                 | NR       | Catarrhal, Perforated, Suppurated                            | 82.86      | 8.67        | 1.51        | 0           |                           | Open Surgery                  | NR                                                   | General            | NR                                        | 461    |
| Shang           | 2017 | Moderate     | Cohort          | China       | Retrospective | Consecutive     | One site  | 2013-2016 | Adults                                 | 54.3  | 2.2                | NR       | Unclear                                                      | NR         | NR          | NR          | NR          |                           | Laparoscopy or Open Surgery   | NR                                                   | NR                 | Erythema, swelling and purulent discharge | 398    |
| Shimizu         | 2014 | Low          | Cross sectional | Japan       | Retrospective | Not clear       | One site  | 2000-2012 | Adults                                 | 44    | 35                 | NR       | Catarrhal, Gangrenous                                        | 19         | NR          | NR          | 37          |                           | Open Surgery                  | NR                                                   | General            | According to CDC-NNIS diagnostic Criteria | 300    |
| Shindholimath   | 2011 | Moderate     | Cross sectional | India       | Retrospective | Consecutive     | One site  | 2007-2009 | Adults                                 | 68.4  | NR                 | NR       | Perforated, Suppurated, Gangrenous, Appendicular abscess     | 0          | 36.8        | 5.3         | 26.3        | 100                       | Laparoscopy                   | 1.6                                                  | General            | NR                                        | 19     |
| Siam            | 2017 | Moderate     | Cohort          | Israel      | Retrospective | Consecutive     | One site  | 2008-2015 | Adults                                 | 62.8  | 34.1               | NR       | Unclear                                                      | NR         | NR          | NR          | NR          | 100                       | Laparoscopy with Open Surgery | 0.7                                                  | General            | NR                                        | 1649   |
| Silva           | 2008 | Moderate     | Cohort          | Chile       | Prospective   | Random          | One site  | 2005-2006 | Adults                                 | 58.9  | NR                 | NR       | Unclear                                                      | NR         | NR          | NR          | NR          |                           | Open Surgery                  | NR                                                   | General            | NR                                        | 433    |
| Singh           | 2017 | Moderate     | Clinical trial  | India       | Prospective   | Consecutive     | One site  | 2014-2015 | Adults                                 | 43.2  | 28.7               | 11.4     | Unclear                                                      | NR         | NR          | NR          | NR          |                           | Laparoscopy or Open Surgery   | NR                                                   | General            | NR                                        | 44     |
| Siribumrungwong | 2013 | Low          | Cohort          | Thailand    | Retrospective | Systematic      | One site  | 2006      | Adults                                 | 65    | 37                 | NR       | Perforated                                                   | NR         | 100         | NR          | NR          | 100                       | Open Surgery                  | 1.2                                                  | NR                 | According to CDC-NNIS diagnostic criteria | 128    |
| Sivrikoz        | 2015 | Moderate     | Cohort          | USA         | Retrospective | Exhaustive      | Multisite | 2004-2010 | Children, Adolescents, Adults, Elderly | 52.1  | 48                 | NR       | Unclear                                                      | NR         | NR          | NR          | NR          |                           | Laparoscopy or Open Surgery   | 0.9                                                  | NR                 | NR                                        | 4844   |
| Soll            | 2016 | Low          | Cohort          | Switzerland | Retrospective | Consecutive     | One site  | 2009-2013 | Children, Adolescents, Adults, Elderly | 54.7  | 26.5               | NR       | Catarrhal, Perforated, Suppurated, Gangrenous                | NR         | 46          | NR          | NR          | 100                       | Laparoscopy                   | 1                                                    | NR                 | According to CDC-NNIS diagnostic Criteria | 813    |
| Sozutek         | 2013 | Low          | Clinical trial  | Turkey      | Retrospective | Consecutive     | One site  | 2010-2011 | Adults                                 | 44    | 30.9               | NR       | Catarrhal, Perforated                                        | 57         | 20          | NR          | NR          |                           | Laparoscopy or Open Surgery   | 0.5                                                  | General            | NR                                        | 75     |
| Shishewachart   | 2016 | Moderate     | Cross sectional | Thailand    | Retrospective | Consecutive     | One site  | 2012-2014 | Children, Adolescents, Adults, Elderly | 52    | 43.7               | 7.4      | Unclear                                                      | NR         | NR          | NR          | NR          |                           | Open Surgery                  | NR                                                   | General            | NR                                        | 450    |
| Staszewicz      | 2014 | Moderate     | Cohort          | Switzerland | Prospective   | Systematic      | Multisite | 1998-2011 | Children, Adolescents, Adults, Elderly | 54    | 34.2               | NR       | Unclear                                                      | NR         | NR          | NR          | NR          |                           | Laparoscopy or Open Surgery   | 1                                                    | NR                 | According to CDC-NNIS diagnostic Criteria | 6383   |
| Suttie          | 2004 | High         | Case control    | Scotland    | Retrospective | Not clear       | One site  | 1997-2002 | Children                               | 50    | 10.8               | NR       | Perforated, Suppurated, Gangrenous                           | 0          | 2           | 50          | 14          |                           | Laparoscopy                   | 1                                                    | General            | NR                                        | 60     |
| Svensson        | 2016 | Moderate     | Cohort          | Sweden      | Prospective   | Consecutive     | One site  | 2006-2010 | Children, Adolescents                  | 60.2  | 11.3               | NR       | Catarrhal, Perforated, Suppurated, Gangrenous, not described | 6.6        | 21.8        | 44.6        | 29.8        | 100                       | Laparoscopy or Open Surgery   | 0.7                                                  | General            | NR                                        | 1745   |

| Author     | Year | Risk of bias | Design          | Country     | Timing        | Sampling method | Sites     | Period    | Population                             | %Male | Mean or median age | %Obesity | Pattern of appendicitis                            | %Catarrhal | %Perforated | %Suppurated | %Gangrenous | % with antibiotic therapy | Type of surgery               | Time to complete the surgery intervention (in hours) | Type of anesthesia | SSI Definition                            | Sample |
|------------|------|--------------|-----------------|-------------|---------------|-----------------|-----------|-----------|----------------------------------------|-------|--------------------|----------|----------------------------------------------------|------------|-------------|-------------|-------------|---------------------------|-------------------------------|------------------------------------------------------|--------------------|-------------------------------------------|--------|
| Taguchi    | 2015 | Moderate     | Clinical trial  | Japan       | Prospective   | Random          | One site  | 2009-2014 | Adults                                 | 65.43 | 47.5               | NR       | Unclear                                            | NR         | NR          | NR          | NR          |                           | Laparoscopy or Open Surgery   | 1.2                                                  | General            | According to CDC-NNIS diagnostic Criteria | 81     |
| Tanaka     | 2007 | Moderate     | Cohort          | Japan       | Retrospective | Consecutive     | One site  | 2002-2005 | Children                               | 54.3  | 2.2                | NR       | Unclear                                            | NR         | NR          | NR          | NR          |                           | Laparoscopy or Open Surgery   | NR                                                   | NR                 | NR                                        | 95     |
| Tijerina   | 2010 | Low          | Clinical trial  | Mexico      | Prospective   | Exhaustive      | One site  | 2005-2007 | Children, Adolescents, Adults, Elderly | 46    | NR                 | NR       | Unclear                                            | NR         | NR          | NR          | NR          | 100                       | Open Surgery                  | NR                                                   | General            | NR                                        | 529    |
| Toro Pablo | 2017 | Moderate     | Cohort          | Spain       | Retrospective | Consecutive     | One site  | 2012-2016 | Children, Adolescents, Adults          | NR    | 26                 | NR       | Unclear                                            | NR         | NR          | NR          | NR          |                           | Laparoscopy or Open Surgery   | NR                                                   | NR                 | NR                                        | 600    |
| Towfigh    | 2011 | Low          | Clinical trial  | USA         | Prospective   | Random          | One site  | 2007-2009 | Adults                                 | 77.3  | 33                 | NR       | Perforated                                         | 0          | 100         | 0           | 0           |                           | Open Surgery                  | NR                                                   | NR                 | NR                                        | 75     |
| Troillet   | 2017 | Low          | Cohort          | Switzerland | Prospective   | Consecutive     | Multisite | 2011-2015 | Children, Adolescents, Adults, Elderly | NR    | NR                 | NR       | Unclear                                            | NR         | NR          | NR          | NR          | 92.2                      | Laparoscopy or Open Surgery   | NR                                                   | NR                 | According to CDC-NNIS diagnostic Criteria | 15439  |
| Tsioplis   | 2013 | Moderate     | Cross sectional | Germany     | Retrospective | Consecutive     | One site  | 1999-2008 | Children, Adolescents, Adults, Elderly | 51    | 23                 | 9        | Catarrhal, Perforated, Suppurated, Gangrenous      | 19         | NR          | 50          | 25          | 75                        | Laparoscopy or Open Surgery   | NR                                                   | Not reported       | NR                                        | 1439   |
| Vahdad     | 2016 | Moderate     | Cross sectional | Germany     | Retrospective | Systematic      | One site  | 2008-2012 | Children, Adolescents                  | 52.4  | NR                 | NR       | Catarrhal, Perforated, Phelgmonous in 43% of cases | 48.2       | 8.7         | NR          | NR          |                           | Laparoscopy                   | 1.1                                                  | NR                 | NR                                        | 309    |
| Van Rossem | 2016 | High         | Cohort          | Netherlands | Prospective   | Consecutive     | Multisite | 2014      | Adults                                 | 49.7  | 39.0               | NR       | Catarrhal, Perforated, Gangrenous                  | 73.7       | 11.0        | NR          | 9.9         | 96.6                      | Laparoscopy or Open Surgery   | 0.72                                                 | NR                 | NR                                        | 1378   |
| Van Rossem | 2014 | High         | Cohort          | Netherlands | Retrospective | Consecutive     | Multisite | 2004-2010 | Adults                                 | 53.2  | 49                 | NR       | Perforated                                         | 0          | 100         | 0           | 0           | 100                       | Laparoscopy or Open Surgery   | 0.85                                                 | NR                 | NR                                        | 267    |
| Wang-Chan  | 2017 | Low          | Cross sectional | Switzerland | Retrospective | Consecutive     | One site  | 2013-2014 | Children, Adolescents, Adults, Elderly | 55.3  | 47                 | 13.8     | Unclear                                            | NR         | NR          | NR          | NR          |                           | Laparoscopy with Open Surgery | NR                                                   | General            | According to CDC-NNIS diagnostic Criteria | 246    |
| Watanabe   | 2011 | Low          | Cross sectional | Japan       | Prospective   | Consecutive     | Multisite | 2005-2006 | Adults                                 | 59.4  | 63.8               | NR       | Unclear                                            | NR         | NR          | NR          | NR          |                           | Laparoscopy or Open Surgery   | NR                                                   | General            | According to CDC-NNIS diagnostic Criteria | 903    |
| Willis     | 2016 | Moderate     | Cohort          | USA         | Prospective   | Consecutive     | One site  | 2013-2014 | Children, Adolescents                  | 58.5  | 8.8                | NR       | Unclear                                            | NR         | NR          | NR          | NR          | 100                       | Laparoscopy or Open Surgery   | NR                                                   | General            | NR                                        | 313    |
| Wong       | 2015 | High         | Cohort          | Peru        | Prospective   | Not clear       | Multisite | 2005-2010 | Adults                                 | NR    | NR                 | NR       | Unclear                                            | NR         | NR          | NR          | NR          |                           | Laparoscopy or Open Surgery   | NR                                                   | General            | NR                                        | 352    |
| Wu         | 2006 | Low          | Cross sectional | Taiwan      | Retrospective | Not clear       | One site  | 2001-2005 | Adults                                 | 75    | 42                 | NR       | Unclear                                            | NR         | NR          | NR          | NR          |                           | Laparoscopy or Open Surgery   | 0.95                                                 | General            | NR                                        | 1795   |

| Author     | Year | Risk of bias | Design          | Country | Timing        | Sampling method | Sites     | Period    | Population                             | %Male | Mean or median age | %Obesity | Pattern of appendicitis            | %Catarrhal | %Perforated | %Suppurated | %Gangrenous | % with antibiotic therapy | Type of surgery             | Time to complete the surgery intervention (in hours) | Type of anesthesia | SSI Definition | Sample |
|------------|------|--------------|-----------------|---------|---------------|-----------------|-----------|-----------|----------------------------------------|-------|--------------------|----------|------------------------------------|------------|-------------|-------------|-------------|---------------------------|-----------------------------|------------------------------------------------------|--------------------|----------------|--------|
| Wu         | 2011 | Moderate     | Cohort          | Taiwan  | Retrospective | Exhaustive      | Multisite | 2004-2009 | Children, Adolescents, Adults, Elderly | 58.1  | 36.4               | NR       | Unclear                            | NR         | NR          | NR          | NR          |                           | Laparoscopy or Open Surgery | NR                                                   | General            | NR             | 1366   |
| Wu         | 2017 | Moderate     | Cross sectional | China   | Retrospective | Consecutive     | One site  | 2014-2016 | Elderly                                | 59    | 71                 | NR       | Perforated, Suppurated, Gangrenous | 0          | 61.7        | 10          | 28.7        | 100                       | Laparoscopy or Open Surgery | 1                                                    | General            | NR             | 115    |
| Wu         | 2014 | Moderate     | Clinical trial  | China   | Prospective   | Random          | One site  | 2011-2013 | Children, Adolescents                  | 60    | 8.5                | NR       | Catarrhal                          | 100        | 0           | 0           | 0           |                           | Laparoscopy                 | 1                                                    | General            | NR             | 60     |
| Yaghoubian | 2010 | High         | Cross sectional | USA     | Retrospective | Exhaustive      | Multisite | 1998-2007 | Children, Adolescents, Adults, Elderly | 61.5  | 29.2               | NR       | Catarrhal, Perforated              | 73.4       | 26.6        | 0           | 0           |                           | Laparoscopy or Open Surgery | NR                                                   | NR                 | NR             | 4325   |
| Yagnik     | 2010 | Moderate     | Cross sectional | India   | Retrospective | Consecutive     | One site  | 2007-2009 | Children, Adolescents, Adults          | 32.5  | 23.41              | NR       | Catarrhal                          | 100        | 0           | 0           | 0           | 100                       | Laparoscopy or Open Surgery | 1                                                    | General            | NR             | 151    |
| Yousef     | 2017 | Moderate     | Cohort          | Canada  | Prospective   | Consecutive     | One site  | 2015-2016 | Children, Adolescents                  | 63.1  | 9.3                | NR       | Perforated                         | 0          | 100         | 0           | 0           | 100                       | Laparoscopy                 | NR                                                   | General            | NR             | 122    |
| Zhang      | 2015 | Moderate     | Clinical trial  | China   | Prospective   | Random          | One site  | 2012-2013 | Adults                                 | 47.2  | 30.8               | NR       | Unclear                            | 10.2       | 7.4         | 54.6        | 9.3         |                           | Laparoscopy                 | 0.9                                                  | General            | NR             | 108    |

NR: not reported

## References

1. Adejumo A.A., N.M., Mshelia, Y.M., Saleh. Clinicopathological presentation and management outcome of appendicitis in gombe, north-east nigeria: a 7-year retrospective audit. *Niger J Med.* 2015;24(4):337-43.
2. Aguiló J., S., Peiró, C., Muñoz, J., García del Caño, M., Garay, V., Viciano, et al. Adverse outcomes in the surgical treatment of acute appendicitis. *Efectos adversos en la cirugía de la apendicitis aguda.* 2005;78(5):312-7.
3. Adhikary S., S., Tyagi, G., Sapkota, A., Afaq, B.K., Bhattarai, C.S., Agrawal. Port exteriorization appendectomy: is it the future? *Nepal Med Coll J.* 2008;10(1):30-4.
4. Ahmad M., K., Ali, H., Latif, S., Naz, K., Said. Comparison of primary wound closure with delayed primary closure in perforated appendicitis. *J Ayub Med Coll Abbottabad.* 2014;26(2):153-7.
5. Ahmed I., J., Burr, M., Castillo, D., Collins, J.A., Cook, M., Campbell, et al. Single port/incision laparoscopic surgery compared with standard three-port laparoscopic surgery for appendectomy: A randomized controlled trial. *Surg Endosc Interv Tech.* 2015;29(1):77-85.
6. Akkoyun I., A., Taş Tuna. Advantages of abandoning abdominal cavity irrigation and drainage in operations performed on children with perforated appendicitis. *J Pediatr Surg.* 2012;47(10):1886-90.
7. Al-Saadi A.S., A.H., Al-Wadan, S.A., Hamarnah, H., Amin. Is abandoning routine peritoneal cultures during appendectomy justified? *Saudi Med J.* 2007;28(12):1827-9.
8. Al-Temimi M.H., M.A., Berglin, E.G., Kim, D.J., Tessier, S.D., Johna. Endostapler versus Hem-O-Lok clip to secure the appendiceal stump and mesoappendix during laparoscopic appendectomy. *Am J Surg.* 2017;214(6):1143-8.

- 1  
2  
3 9. Ali N., S., Aliyu. Appendicitis and its surgical management experience at the University of  
4 Maiduguri Teaching Hospital Nigeria. *Niger J Med.* 2012;21(2):223-6.  
5  
6  
7
- 8  
9 10. Ali K., H., Latif, S., Ahmad. Frequency of wound infection in non-perforated appendicitis  
10 with use of single dose preoperative antibiotics. *J Ayub Med Coll Abbottabad.*  
11 2015;27(2):378-80.  
12  
13
- 14  
15 11. Almström M., J.F., Svensson, B., Patkova, A., Svenningsson, T., Wester. In-hospital  
16 surgical delay does not increase the risk for perforated appendicitis in children. *Ann Surg.*  
17 2017;265(3):616-21.  
18  
19
- 20  
21 12. Álvarez-Moreno C., A.M., Pérez-Fernández, V.D., Rosenthal, J., Quintero, E., Chapeta-  
22 Parada, C., Linares, et al. Surgical site infection rates in 4 cities in Colombia: Findings of  
23 the International Nosocomial Infection Control Consortium (INICC). *Am J Infect Control.*  
24 2014;42(10):1089-92.  
25  
26
- 27  
28 13. Andert A., H.P., Alizai, C.D., Klink, N., Neitzke, C., Fitzner, C., Heidenhain, et al. Risk  
29 factors for morbidity after appendectomy. *Langenbeck's Arch Surg.* 2017;402(6):987-93.  
30  
31
- 32  
33 14. Andersson R.E. Short-term complications and long-term morbidity of laparoscopic and  
34 open appendectomy in a national cohort. *Br J Surg.* 2014;101(9):1135-42.  
35  
36
- 37  
38 15. Aranda-Narváez J.M., A.J., González-Sánchez, N., Marín-Camero, C., Montiel-Casado, P.,  
39 López-Ruiz, B., Sánchez-Pérez, et al. Conservative approach versus urgent appendectomy  
40 in surgical management of acute appendicitis with abscess or phlegmon. *Resultados del*  
41 *tratamiento conservador inicial y de la cirugía urgente en la apendicitis aguda evolucionada.*  
42 2010;102(11):648-52.  
43  
44
- 45  
46 16. Aranda-Narváez J.M., T., Prieto-Puga Arjona, B., García-Albiach, M.C., Montiel-Casado,  
47 A.J., González-Sánchez, B., Sánchez-Pérez, et al. Postappendectomy surgical site infection:  
48 Overall rate and type according to open/laparoscopic approach. *Infección de sitio quirúrgico*  
49  
50  
51  
52  
53  
54  
55  
56  
57  
58  
59  
60

1  
2  
3 tras apendicectomía urgente: tasa global y tipo según la vía de abordaje  
4 (abierta/laparoscópica). 2014;32(2):76-81.  
5  
6  
7  
8

- 9 17. Arthur T., R., Gartrell, B., Manoharan, D., Parker. Emergency appendectomy in Australia:  
10 findings from a multicentre, prospective study. ANZ J Surg. 2017;87(9):656-60.  
11  
12  
13  
14 18. Asefa Z. Acute appendicitis in Yirgalem Hospital, southern Ethiopia. Ethiop Med J.  
15 2002;40(2):155-62.  
16  
17  
18  
19 19. Assefa Z., A., G/yesuse. Acute appendicitis in children admitted to zewditu memorial  
20 hospital. Ethiop Med J. 2014;52(4):189-95.  
21  
22  
23  
24 20. Atif M.L., F., Sadaoui, A., Bezzaoucha, C.A., BezzaouchaKaddache, R., Boukari, S.,  
25 Djelato, et al. Intra-abdominal abscesses and laparoscopic versus open appendectomies.  
26 Infect Control Hosp Epidemiol. 2009;30(7):713-5  
27  
28  
29  
30  
31  
32 21. Bae E., A., Dehal, V., Franz, M., Joannides, N., Sakis, J., Scurlock, et al. Postoperative  
33 antibiotic use and the incidence of intra-abdominal abscess in the setting of suppurative  
34 appendicitis: a retrospective analysis. Am J Surg.2016;212(6):1121-5.  
35  
36  
37  
38  
39  
40 22. Bae S.U., W.K., Jeong, S.K., Baek. Single-port laparoscopic interval appendectomy for  
41 perforated appendicitis with a periappendiceal abscess. Ann Coloproctol. 2016;32(3):105-  
42 10.  
43  
44  
45  
46  
47 23. Baek H.N., Y.H., Jung, Y.H., Hwang. Laparoscopic versus open appendectomy for  
48 appendicitis in elderly patients. J Korean Soc Coloproctology. 2011;27(5):241-5.  
49  
50  
51  
52  
53 24. Bali İ., F., Karateke, S., Özyazıcı, A., Kuvvetli, C., Oruç, E., Menekşe, et al. Comparison  
54 of intracorporeal knotting and endoloop for stump closure in laparoscopic appendectomy.  
55 Laparoskopik appendektomide intrakorporal düğüm ve endoloop ile güdük kapama  
56 yöntemlerinin karşılaştırılması. 2015;21(6):446-9.  
57  
58  
59  
60

- 1  
2  
3  
4  
5 25. Bhangu A., Richardson, C., Torrance, A., Pinkney, T., Collaborative, Natl Surg Res.  
6 Multicentre observational study of performance variation in provision and outcome of  
7 emergency appendicectomy. *British Journal Of Surgery*. 2013;100(9):1240-52.  
8  
9  
10  
11  
12 26. Bansal V., S., Altermatt, D., Nadal, C., Berger. Lack of benefit of preoperative antimicrobial  
13 prophylaxis in children with acute appendicitis: A prospective cohort study. *Infection*.  
14 2012;40(6):635-41.  
15  
16  
17  
18  
19 27. Batajoo H., N.K., Hazra. Laparoscopic versus open appendectomy in acute appendicitis. *J*  
20 *Nepal Health Res Counc*. 2012;10(22):239-42.  
21  
22  
23  
24  
25 28. Saranga Bharathi R., V., Sharma, A., Chakladar, P., Kumari. Port exteriorisation  
26 appendectomy-our experience. *Med J Armed Forces India*. 2011;67(2):147-51.  
27  
28  
29  
30  
31 29. Biçakci U., B., Tander, M., Günaydin, R., Rizalar, E., Aritürk, S.H., Ayyildiz, et al. The  
32 comparison of open and laparoscopic appendectomy: Is there any outcome difference  
33 between non-complicated and complicated appendicitis? *Balkan Med J*. 2011;28(3):304-6.  
34  
35  
36  
37  
38 30. Bickel A., M., Gurevits, R., Vamos, S., Ivry, A., Eitan. Perioperative hyperoxygenation and  
39 wound site infection following surgery for acute appendicitis : A randomized, prospective,  
40 controlled trial. *Arch Surg*. 2011;146(4):464-70.  
41  
42  
43  
44  
45  
46 31. Blackwood B.P., C.D., Gause, J.C., Harris, C.M., Theodorou, I., Helenowski, T.B., Lautz,  
47 et al. Overweight and obese pediatric patients have an increased risk of developing a  
48 surgical site infection. *Surg Infect*. 2017;18(4):491-7.  
49  
50  
51  
52  
53 32. Blakely M.L., R., Williams, M.S., Dassinger, J.W., Eubanks III, P., Fischer, E.Y., Huang,  
54 et al. Early vs interval appendectomy for children with perforated appendicitis. *Arch Surg*.  
55 2011;146(6):660-5.  
56  
57  
58  
59  
60

- 1  
2  
3 33. Bonadio W., K., Rebillot, O., Ukwuoma, C., Saracino, A., Iskhakov. Management of  
4 Pediatric Perforated Appendicitis: Comparing Outcomes Using Early Appendectomy  
5 versus Solely Medical Management. *Pediatr Infect Dis J.* 2017;36(10):937-41.  
6  
7  
8  
9  
10  
11 34. Boomer L.A., J.N., Cooper, K.J., Deans, P.C., Minneci, K., Leonhart, K.A., Diefenbach, et  
12 al. Does delay in appendectomy affect surgical site infection in children with appendicitis?  
13 *J Pediatr Surg.* 2014;49(6):1026-9.  
14  
15  
16  
17  
18 35. Boomer L.A., J.N., Cooper, S., Anandalwar, S.C., Fallon, D., Ostlie, C.M., Leys, et al.  
19 Delaying appendectomy does not lead to higher rates of surgical site infections. *Ann Surg.*  
20 2016;264(1):164-8.  
21  
22  
23  
24  
25  
26 36. Bozkurt M.A., M.G., Ünsal, S., Kapan, B., Kankaya, M.U., Kalaycii, H., Aliiş. Two  
27 different methods for appendiceal stump closure: Metal clip and Hem-o-lok clip. *J*  
28 *Laparoendosc Adv Surg Techn.* 2014;24(8):571-3.  
29  
30  
31  
32  
33 37. Brandt C., U., Hott, D., Sohr, F., Daschner, P., Gastmeier, H., Rüden. Operating room  
34 ventilation with laminar airflow shows no protective effect on the surgical site infection rate  
35 in orthopedic and abdominal surgery. *Ann Surg.* 2008;248(5):695-700.  
36  
37  
38  
39  
40  
41 38. Cairo S.B., M.V., Raval, M., Browne, H., Meyers, D.H., Rothstein. Association of same-  
42 day discharge with hospital readmission after appendectomy in pediatric patients. *JAMA*  
43 *Surg.* 2017;152(12):1106-12.  
44  
45  
46  
47  
48 39. Cameron D.B., P., Melvin, D.A., Graham, C.C., Glass, S.K., Serres, M.P., Kronman, et al.  
49 Extended Versus Narrow-spectrum Antibiotics in the Management of Uncomplicated  
50 Appendicitis in Children: A Propensity-matched Comparative Effectiveness Study. *Ann*  
51 *Surg.* 2017.  
52  
53  
54  
55  
56  
57 40. Cao J.-G., F., Tao, X.-J., Zhou, X.-G., Wang, S.-S., Wang, H., Zhang, et al. Trends and  
58 outcomes of laparoscopic appendectomy in China: A multicenter, retrospective cohort  
59  
60



- 1  
2  
3 study. *Surg Pract.* 2015;19(4):166-72.  
4  
5  
6  
7  
8 41. Cervantes-Sánchez C.R., R., Gutiérrez-Vega, J.A., Vázquez-Carpizo, P., Clark, C., Athié-  
9 Gutiérrez. Syringe pressure irrigation of subdermic tissue after appendectomy to decrease  
10 the incidence of postoperative wound infection. *World J Surg.* 2000;24(1):38-42.  
11  
12  
13  
14  
15 42. Chamisa I. A clinicopathological review of 324 appendices removed for acute appendicitis  
16 in Durban, South Africa: a retrospective analysis. *Ann R Coll Surg Engl.* 2009;91(8):688-  
17 92.  
18  
19  
20  
21  
22 43. Chaudhary I.A., Samiullah, A.A., Mallhi, Z., Afridi, A., Bano. Is it necessary to invaginate  
23 the stump after appendectomy? *Pak J Med Sci.* 2005;21(1):35-8.  
24  
25  
26  
27  
28 44. Chen D., H., Shi, H., Dong, K., Liu, K., Ding. Gasless single-incision laparoscopic  
29 appendectomy. *Surg Endosc Interv Tech.* 2011;25(5):1472-6.  
30  
31  
32  
33  
34 45. Chen C.-Y., Y.-C., Chen, H.-N., Pu, C.-H., Tsai, W.-T., Chen, C.-H., Lin. Bacteriology of  
35 acute appendicitis and its implication for the use of prophylactic antibiotics. *Surg Infect.*  
36 2012;13(6):383-90.  
37  
38  
39  
40  
41 46. Chen C.-C., C.-T., Ting, M.-J., Tsai, W.-C., Hsu, P.-C., Chen, M.-D., Lee, et al.  
42 Appendectomy timing: Will delayed surgery increase the complications? *J Chin Med*  
43 *Assoc.* 2015;78(7):395-9.  
44  
45  
46  
47  
48 47. Chiang R.-A., S.-L., Chen, Y.-C., Tsai, M.-J., Bair. Comparison of primary wound closure  
49 versus open wound management in perforated appendicitis. *J Formos Med Assoc.*  
50 2006;105(10):791-5.  
51  
52  
53  
54  
55 48. Chiang R.-A., S.-L., Chen, Y.-C., Tsai. Delayed primary closure versus primary closure for  
56 wound management in perforated appendicitis: A prospective randomized controlled trial.  
57 *J Chin Med Assoc.* 2012;75(4):156-9.  
58  
59  
60

- 1  
2  
3  
4  
5  
6 49. Cho M., J., Kang, I.-K., Kim, K.Y., Lee, S.-K., Sohn. Underweight body mass index as a  
7 predictive factor for surgical site infections after laparoscopic appendectomy. *Yonsei Med*  
8 *J.* 2014;55(6):1611-6.  
9  
10  
11  
12  
13 50. Choudhary S.K., S.K., Dhakaita. Appendicular mass-early appendicectomy vs interval  
14 appendicectomy. *Intl J Pharma Bio Sci.* 2014;5(1):B400-B4.  
15  
16  
17  
18  
19 51. Clyde C., T., Bax, A., Merg, M., MacFarlane, P., Lin, S., Beyersdorf, et al. Timing of  
20 intervention does not affect outcome in acute appendicitis in a large community practice.  
21 *Am J Surg.* 2008;195(5):590-3.  
22  
23  
24  
25  
26 52. Coakley B.A., E.S., Sussman, T.S., Wolfson, A.S., Bhagavath, J.J., Choi, N.E., Ranasinghe,  
27 et al. Postoperative antibiotics correlate with worse outcomes after appendectomy for  
28 nonperforated appendicitis. *J Am Coll Surg.* 2011;213(6):778-83.  
29  
30  
31  
32  
33  
34 53. Crandall M., M.B., Shapiro, M., Worley, M.A., West. Acute uncomplicated appendicitis:  
35 case time of day influences hospital length of stay. *Surg Infect (Larchmt).* 2009;10(1):65-  
36 9.  
37  
38  
39  
40  
41  
42 54. Dede K., T., Mersich, A., Zaránd, I., Besznyák, Z., Baranyai, B., Atkári, et al. Laparoscopic  
43 or open appendectomy? *Laparoszkópos vagy nyílt appendectomia?* 2008;149(50):2357-61.  
44  
45  
46  
47  
48 55. Dhiman N., A., Chi, T.M., Pawlik, D.T., Efron, E.R., Haut, E.B., Schneider, et al. Increased  
49 complications after appendectomy in patients with cerebral palsy: Are special needs patients  
50 at risk for disparities in outcomes? *Surgery.* 2013;154(3):479-85.  
51  
52  
53  
54  
55 56. Dimitriou I., B., Reckmann, O., Nephuth, M., Betzler. Single institution's experience in  
56 laparoscopic appendectomy as a suitable therapy for complicated appendicitis.  
57 *Langenbeck's Arch Surg.* 2013;398(1):147-52.  
58  
59  
60

- 1  
2  
3 57. Durkin M.J., K.V., Dicks, A.W., Baker, S.S., Lewis, R.W., Moehring, L.F., Chen, et al.  
4 Seasonal variation of common surgical site infections: Does season matter? *Infect Control*  
5 *Hosp Epidemiol.* 2015;36(9):1011-6.  
6  
7  
8  
9  
10  
11 58. Ein S.H., A., Nasr, A., Ein. Open appendectomy for pediatric ruptured appendicitis: a  
12 historical clinical review of the prophylaxis of wound infection and postoperative intra-  
13 abdominal abscess. *Can J Surg.* 2013;56(3):E7-E12.  
14  
15  
16  
17  
18 59. Fukuda H. Patient-related risk factors for surgical site infection following eight types of  
19 gastrointestinal surgery. *J Hosp Infect.* 2016;93(4):347-54.  
20  
21  
22  
23  
24 60. Gandaglia G., K.R., Ghani, A., Sood, J.R., Meyers, J.D., Sammon, M., Schmid, et al. Effect  
25 of minimally invasive surgery on the risk for surgical site infections results from the national  
26 surgical quality improvement program (nsqip) database. *JAMA Surg.* 2014;149(10):1039-  
27 44.  
28  
29  
30  
31  
32  
33 61. Garcell H.G., A.V., Arias, C.A., Pancorbo Sandoval, E.G., García, M.E., Valle Gamboa,  
34 A.B., Sado, et al. Incidence and etiology of surgical site infections in appendectomies: A 3-  
35 year prospective study. *Oman Med J.* 2017;32(1):31-5.  
36  
37  
38  
39  
40  
41 62. Ghnnam W.M. Elderly versus young patients with appendicitis 3 years experience. *Alex J*  
42 *Med.* 2012;48(1):9-12.  
43  
44  
45  
46  
47 63. Giesen L.J., A.L., van den Boom, C.C., van Rossem, P.T., den Hoed, B.P., Wijnhoven.  
48 Retrospective Multicenter Study on Risk Factors for Surgical Site Infections after  
49 Appendectomy for Acute Appendicitis. *Dig Surg.* 2017;34(2):103-7.  
50  
51  
52  
53  
54 64. Giiti G.C., H.D., Mazigo, J., Heukelbach, W., Mahalu. HIV, appendectomy and  
55 postoperative complications at a reference hospital in Northwest Tanzania: Cross-sectional  
56 study. *AIDS Res Ther.* 2010;7.  
57  
58  
59  
60

- 1  
2  
3 65. Golub A.V., R.S., Kozlov, V.G., Pleshkov, A.P., Moskalev, R.A., Alibegov, M.A.,  
4 Chelombitko. Surgical Site Infections after Open Appendectomy and Effectiveness of  
5 Complex Approach to Their Prevention. *Khirurgiia (Mosk)*. 2016(6):68-76.  
6  
7  
8  
9  
10  
11 66. Gross T.S., C., McCracken, K.F., Heiss, M.L., Wulkan, M.V., Raval. The contribution of  
12 practice variation to length of stay for children with perforated appendicitis. *J Pediatr Surg*.  
13 2016;51(8):1292-7.  
14  
15  
16  
17  
18 67. Gurien L.A., D.L., Wyrick, S.D., Smith, M.S., Dassinger. Optimal timing of appendectomy  
19 in the pediatric population. *J Surg Res*. 2016;202(1):126-31.  
20  
21  
22  
23  
24 68. Hamzaoglu I, B., Baca, D.E., Böler, E., Polat, Y., Özer. Is umbilical flora responsible for  
25 wound infection after laparoscopic surgery? *Surg Laparoscopy Endosc Percutaneous Tech*.  
26 2004;14(5):263-7.  
27  
28  
29  
30  
31  
32 69. Harmon L.A., M.L., Davis, D.C., Jupiter, R.C., Frazee, J.L., Regner. Computed tomography  
33 to operating room in less than 3 hours minimizes complications from appendicitis. *Am J*  
34 *Surg*. 2016;212(2):246-50.  
35  
36  
37  
38  
39 70. Helling T.S., D.F., Soltys, S., Seals. Operative versus non-operative management in the care  
40 of patients with complicated appendicitis. *Am J Surg*. 2017;214(6):1195-200.  
41  
42  
43  
44  
45 71. Helmer K.S., E.K., Robinson, K.P., Lally, J.C., Vasquez, K.L., Kwong, T.H., Liu, et al.  
46 Standardized patient care guidelines reduce infectious morbidity in appendectomy patients.  
47 *Am J Surg*. 2002;183(6):608-13.  
48  
49  
50  
51  
52 72. Hesami M.A., H., Alipour, H., Nikoupour Daylami, B., Alipour, S., Bazargan-Hejazi, A.,  
53 Ahmadi. Irrigation of abdomen with imipenem solution decreases surgical site infections in  
54 patients with perforated appendicitis: A randomized clinical trial. *Iran Red Crescent MedJ*.  
55 2014;16(4).  
56  
57  
58  
59  
60

- 1  
2  
3 73. Horvath P., J., Lange, R., Bachmann, F., Struller, A., Königsrainer, M., Zdichavsky.  
4 Comparison of clinical outcome of laparoscopic versus open appendectomy for complicated  
5 appendicitis. *Surg Endosc Interv Tech.* 2017;31(1):199-205.  
6  
7  
8  
9  
10  
11 74. Hughes M.J., E., Harrison, S., Paterson-Brown. Post-operative antibiotics after  
12 appendectomy and post-operative abscess development: A retrospective analysis. *Surg*  
13 *Infect.* 2013;14(1):56-61.  
14  
15  
16  
17 75. Hussain M.I., M.K., Alam, H.H., Al-Qahatani, M.H., Al-Akeely. Role of postoperative  
18 antibiotics after appendectomy in non-perforated appendicitis. *J Coll Phys Surg Pak.*  
19 2012;22(12):756-9.  
20  
21  
22  
23  
24  
25  
26 76. Iqbal M., M., Jawaid, A., Qureshi, S., Iqbal. Effect of povidone-iodine irrigation on post  
27 appendectomy wound infection: Randomized control trial. *J Postgrad Med Inst.*  
28 2015;29(3):160-4.  
29  
30  
31  
32  
33 77. Iñigo J.J., B., Bermejo, B., Oronoz, J., Herrera, A., Tarifa, F., Pérez, et al. Surgical site  
34 infection in general surgery: 5-year analysis and assessment of the National Nosocomial  
35 Infection Surveillance (NNIS) index. *Infección de sitio quirúrgico en un servicio de cirugía*  
36 *general Análisis de cinco años y valoración del índice National Nosocomial Infection*  
37 *Surveillance (NNIS).* 2006;79(4):224-30.  
38  
39  
40  
41  
42  
43  
44 78. Javadi S.M.R., S.Y., Zarghami, P., Ghaderzadeh, M., Ghorbanpoor, H.R., Makarchian, A.,  
45 Derakhshanfar, et al. Comparison of small access and classic McBurney's incisions for open  
46 appendectomy: A randomized controlled trial. *Shiraz E Med J.* 2017;18(10).  
47  
48  
49  
50  
51 79. Jenkins P.C., M.K., Oerline, A.J., Mullard, M.J., Englesbe, D.A., Campbell, M.R.,  
52 Hemmila. Hospital variation in outcomes following appendectomy in a regional quality  
53 improvement program. *Am J Surg.* 2016;212(5):857-62.  
54  
55  
56  
57  
58  
59 80. Kang J., B.N., Bae, G., Gwak, I., Park, H., Cho, K., Yang, et al. Comparative study of a  
60

1  
2  
3 single-incision laparoscopic and a conventional laparoscopic appendectomy for the  
4 treatment of acute appendicitis. *J Korean Soc Coloproctology*. 2012;28(6):304-8.  
5  
6  
7  
8

9 81. Kapischke M., A., Pries, A., Caliebe. Short term and long term results after open vs.  
10 Laparoscopic appendectomy in childhood and adolescence: A subgroup analysis. *BMC*  
11 *Pediatr*. 2013;13(1).  
12  
13  
14

15  
16 82. Karam P.A., A., Hiuser, D., Magnuson, F.G.F., Seifarth. Intracorporeal hybrid single port  
17 vs conventional laparoscopic appendectomy in children. *Pediatr Med Chir*. 2016;38(3):89-  
18 92.  
19  
20  
21  
22

23  
24 83. Karam P.A., A., Mohan, M.R., Buta, F.G., Seifarth. Comparison of Transumbilical  
25 Laparoscopically Assisted Appendectomy to Conventional Laparoscopic Appendectomy in  
26 Children. *Surg Laparoscopy Endosc Percutaneous Tech*. 2016;26(6):508-12.  
27  
28  
29

30  
31 84. Kasatpibal N., S., Jamulitrat, V., Chongsuvivatwong. Standardized incidence rates of  
32 surgical site infection: A multicenter study in Thailand. *Am J Infect Control*.  
33 2005;33(10):587-94.  
34  
35  
36  
37

38  
39 85. Kasatpibal N., M., Nørgaard, H.T., Sørensen, H.C., Schönheyder, S., Jamulitrat, V.,  
40 Chongsuvivatwong. Risk of surgical site infection and efficacy of antibiotic prophylaxis: A  
41 cohort study of appendectomy patients in Thailand. *BMC Infect Dis*. 2006;6.  
42  
43  
44

45  
46 86. Kato Y., T., Marusasa, S., Ichikawa, G.J., Lane, T., Okazaki, A., Yamataka. Lapprotector  
47 use decreases incisional wound infections in cases of perforated appendicitis: a prospective  
48 study. *Asian J Surg*. 2008;31(3):101-3.  
49  
50  
51  
52

53  
54 87. Kell M.R., K., Power, D.C., Winter, C., Power, C., Shields, W.O., Kirwan, et al. Predicting  
55 outcome after appendectomy. *Ir J Med Sci*. 2003;172(2):63-5.  
56  
57  
58

59  
60 88. Khan M.N., T., Fayyad, T.D., Cecil, B.J., Moran. Laparoscopic versus open appendectomy:

- 1  
2  
3 the risk of postoperative infectious complications. *JLS*. 2007;11(3):363-7.  
4  
5  
6  
7  
8 89. Khan K.I., S., Mahmood, M., Akmal, A., Waqas. Comparison of rate of surgical wound  
9 infection, length of hospital stay and patient convenience in complicated appendicitis  
10 between primary closure and delayed primary closure. *J Pak Med Assoc*. 2012;62(8):596-  
11 8.  
12  
13  
14  
15  
16 90. Khan I., M.I., Khan, M., Jawed, U., Shaikh, S., Ahmed, A., Arif. To compare the frequency  
17 of superficial surgical site infection after laparoscopic versus open appendectomy. *Med*  
18 *Forum Monthly*. 2014;25(11):52-5.  
19  
20  
21  
22  
23  
24 91. Khiria L.S., R., Ardhari, N., Mohan, P., Kumar, R., Nambiar. Laparoscopic  
25 appendectomy for complicated appendicitis: Is it safe and justified? A retrospective  
26 analysis. *Surg Laparoscopy Endosc Percutaneous Tech*. 2011;21(3):142-5.  
27  
28  
29  
30  
31 92. Kılıç Ş.S., S., Ekinçi, İ., Karnak, A.Ö., Çiftçi, F.C., Tanyel, M.E., Şenocak. Drainage  
32 systems' effect on surgical site infection in children with perforated appendicitis. *Drenaj*  
33 *Sistemlerinin perforé apandisitli çocuklarda cerrahi alan enfeksiyonuna etkisi*.  
34 2016;7(5):591-4.  
35  
36  
37  
38  
39  
40 93. Kim M.J., F.J., Fleming, D.D., Gunzler, S., Messing, R.M., Salloum, J.R.T., Monson.  
41 Laparoscopic appendectomy is safe and efficacious for the elderly: An analysis using the  
42 National Surgical Quality Improvement Project database. *Surg Endosc Interv Tech*.  
43 2011;25(6):1802-7.  
44  
45  
46  
47  
48  
49 94. Kim J.H., H.Y., Kim, S.K., Park, J.S., Lee, D.S., Heo, S.W., Park, et al. Single-incision  
50 laparoscopic appendectomy versus conventional laparoscopic appendectomy: Experiences  
51 from 1208 cases of single-incision laparoscopic appendectomy. *Ann Surg*.  
52 2015;262(6):1054-8.  
53  
54  
55  
56  
57  
58 95. Kim J.K., J., Kang, W.R., Kim, E.J., Park, S.H., Baik, K.Y., Lee. Does Conversion  
59  
60



- 1  
2  
3 Adversely Impact the Clinical Outcomes for Patients with Complicated Appendicitis? J  
4 Laparoendosc Adv Surg Techn. 2016;26(8):635-40.  
5  
6  
7  
8  
9 96. Kiriakopoulos A., D., Tsakayannis, D., Linos. Laparoscopic management of complicated  
10 appendicitis. JSLS. 2006;10(4):453-6.  
11  
12  
13  
14  
15 97. Kirshtein B., Z.H., Perry, S., Mizrahi, L., Lantsberg. Value of laparoscopic appendectomy  
16 in the elderly patient. World J Surg. 2009;33(5):918-22.  
17  
18  
19  
20  
21 98. Kiudelis M., P., Ignatavicius, K., Zviniene, S., Grizas. Analysis of intracorporeal knotting  
22 with invaginating suture versus endoloops in appendiceal stump closure. Wideochir Inne  
23 Tech Ma?oinwazyjne. 2013;8(1):69-73.  
24  
25  
26  
27  
28 99. Kleif J., L., Rasmussen, S., Fonnes, P., Tibæk, A., Daoud, H., Lund, et al. Enteral  
29 Antibiotics are Non-inferior to Intravenous Antibiotics After Complicated Appendicitis in  
30 Adults: A Retrospective Multicentre Non-inferiority Study. World J Surg.  
31 2017;41(11):2706-14.  
32  
33  
34  
35  
36  
37  
38 100. Koizumi N., H., Kobayashi, Y., Nakase, T., Takagi, K., Fukumoto. Efficacy of  
39 transumbilical laparoscopic-assisted appendectomy for appendicitis: a four-year experience  
40 at a single center. Surg Today. 2015;45(10):1245-9.  
41  
42  
43  
44  
45 101. Shimizu T., M., Ishizuka, K., Kubota. The preoperative serum C-reactive protein level  
46 is a useful predictor of surgical site infections in patients undergoing appendectomy. Surg  
47 Today. 2015;45(11):1404-10.  
48  
49  
50  
51  
52  
53 102. Kumamoto K., H., Imaizumi, N., Hokama, T., Ishiguro, K., Ishibashi, K., Baba, et al.  
54 Recent trend of acute appendicitis during pregnancy. Surg Today. 2015;45(12):1521-6.  
55  
56  
57  
58 103. Kumar B., A., Samad, T.W., Khanzada, M.H., Laghari, A.R., Shaikh. Superiority of  
59 laparoscopic appendectomy over open appendectomy: The Hyderabad experience. Rawal  
60

- 1  
2  
3 Med J. 2008;33(2):165-8.  
4  
5  
6  
7  
8 104. Kumar S., A., Jalan, B.N., Patowary, S., Shrestha. Laparoscopic appendectomy versus  
9 open appendectomy for acute appendicitis: A prospective comparative study. Kathmandu  
10 Univ Med J. 2016;14(55):244-8.  
11  
12  
13  
14  
15 105. Lacher M., O.J., Muensterer, G.R., Yannam, C.J., Aprahamian, L., Perger, M., Megison,  
16 et al. Feasibility of single-incision pediatric endosurgery for treatment of appendicitis in  
17 415 children. J Laparoendosc Adv Surg Techn. 2012;22(6):604-8.  
18  
19  
20  
21  
22 106. Lasses-Martínez B., E., Ortiz-Oshiro, J.L., Cabañas-Ojeda, P., Benito-Expósito, C.,  
23 Fernández-Pérez, J., Alvarez Fernández-Represa. Cost is not a drawback to perform  
24 laparoscopic appendectomy in an academic hospital. Surg Laparoscopy Endosc  
25 Percutaneous Tech. 2014;24(4):e123-e7.  
26  
27  
28  
29  
30  
31  
32 107. Le D., W., Rusin, B., Hill, J., Langell. Post-operative antibiotic use in nonperforated  
33 appendicitis. Am J Surg.2009;198(6):748-52.  
34  
35  
36  
37  
38  
39 108. Lee P., K., Waxman, B., Taylor, S., Yim. Use of wound-protection system and  
40 postoperative wound-infection rates in open appendectomy: A randomized prospective  
41 trial. Arch Surg. 2009;144(9):872-5.  
42  
43  
44  
45  
46 109. Lee S.L., S., Shekherdimian, V.Y., Chiu. Comparison of pediatric appendicitis  
47 outcomes between teaching and nonteaching hospitals. J Pediatr Surg. 2010;45(5):894-7.  
48  
49  
50  
51 110. Lee J.A., K.Y., Sung, J.H., Lee, D.S., Lee. Laparoscopic appendectomy with a single  
52 incision in a single institute. J Korean Soc Coloproctology. 2010;26(4):260-4.  
53  
54  
55  
56  
57 111. Lee S.-Y., H.-M., Lee, C.-S., Hsieh, J.-H., Chuang. Transumbilical laparoscopic  
58 appendectomy for acute appendicitis: A reliable one-port procedure. Surg Endosc Interv  
59  
60

- 1  
2  
3 Tech. 2011;25(4):1115-20.  
4  
5  
6  
7 112. Lee S.L., A., Yaghoubian, A., Kaji. Laparoscopic vs open appendectomy in children:  
8 Outcomes comparison based on age, sex, and perforation status. Arch Surg.  
9 2011;146(10):1118-21.  
10  
11  
12  
13  
14  
15 113. Lee S.M., G.S., Hwang, D.S., Lee. Single-incision laparoscopic appendectomy using  
16 homemade glove port at low cost. J Minimal Access Surg. 2016;12(2):124-8.  
17  
18  
19  
20  
21 114. Levy S.M., G., Holzmann-Pazgal, K.P., Lally, K., Davis, L.S., Kao, K., Tsao. Quality  
22 check of a quality measure: Surgical wound classification discrepancies impact risk-  
23 stratified surgical site infection rates in pediatric appendicitis. J Am Coll Surg.  
24 2013;217(6):969-73.  
25  
26  
27  
28  
29  
30 115. Li P., Q., Xu, Z., Ji, Y., Gao, X., Zhang, Y., Duan, et al. Comparison of surgical stress  
31 between laparoscopic and open appendectomy in children. J Pediatr Surg. 2005;40(8):1279-  
32 83.  
33  
34  
35  
36  
37  
38  
39 116. Lim S.G., E.J., Ahn, S.Y., Kim, I.Y., Chung, J.-M., Park, S.H., Park, et al. A clinical  
40 comparison of laparoscopic versus open appendectomy for complicated appendicitis. J  
41 Korean Soc Coloproctology. 2011;27(6):293-7.  
42  
43  
44  
45  
46 117. Geraldo José de Souza Lima, Silva, Alcino Lázaro da, Castro, Eduardo Godoy, Abras,  
47 Gustavo Munayer, Pires, Lívio José Suretti, Leite, Rodrigo Fabiano Guedes. Efetividade e  
48 segurança da apendicectomia videoassistida em porta única transumbilical em adolescentes  
49 e adultos X1 Effectiveness and safeness of single-port trans-umbilical laparoscopic  
50 appendectomy done in adolescents and adults. Revista do Colégio Brasileiro de Cirurgiões.  
51 2008;35(4):244-51.  
52  
53  
54  
55  
56  
57  
58  
59 118. Lin H.-F., J.-M., Wu, L.-M., Tseng, K.-H., Chen, S.-H., Huang, I.-R., Lai. Laparoscopic  
60

- Versus Open Appendectomy for Perforated Appendicitis. *J Gastrointest Surg.* 2006;10(6):906-10.
119. Litz C.N., S.M., Farach, P.D., Danielson, N.M., Chandler. Obesity and single-incision laparoscopic appendectomy in children. *J Surg Res.* 2016;203(2):283-6.
120. Liu C., W., Wang, Y., Sun, M., Xu, H., Zhuang, H., Chen, et al. Efficacy and complications of laparoscopic appendectomy for pediatric appendicitis. *Int J Clin Exp Med.* 2017;10(9):13784-9.
121. Mahmood M.M., A., Shahab, M.A., Razzaq. Surgical site infection in open versus laparoscopic appendectomy. *Pak J Med Health Sci.* 2016;10(3):1076-8.
122. Mbah N., W.Ek., Opara, N.P., Agwu. Waiting time among acute abdominal emergencies in a Nigerian teaching hospital: Causes of delay and consequences. *Niger J Surg Res.* 2006;8(1):69-73.
123. Memon G.A., A.I., Memon, S.K.A., Shah, R.A., Sahito, Habib-Ur-Rehman, S., Leghari, et al. An experience of treatment outcome in acute appendicitis with antibiotics and appendectomy at a tertiary care hospital. *Med Forum Monthly.* 2017;28(3):136-40.
124. Menezes M., L., Das, M., Alagtal, J., Haroun, P., Puri. Laparoscopic appendectomy is recommended for the treatment of complicated appendicitis in children. *Pediatr Surg Int.* 2008;24(3):303-5.
125. Merenda M., A., Litarski, P., Kabziński, D., Janczak. Laparoscopic appendectomy as an alternative to conventional procedure - results in our own material. *Pol Przegl Chir.* 2013;85(6):323-8.
126. Michailidou M., M.G., Sacco Casamassima, S.D., Goldstein, C., Gause, O., Karim, J.H., Salazar, et al. The impact of obesity on laparoscopic appendectomy: Results from the ACS

- 1  
2  
3 National Surgical Quality Improvement Program pediatric database. *J Pediatr Surg.*  
4 2015;50(11):1880-4.  
5  
6  
7  
8  
9 127. Michailidou M., S.D., Goldstein, M.G., Sacco Casamassima, J.H., Salazar, R., Elliott,  
10 J., Hundt, et al. Laparoscopic versus open appendectomy in children: The effect of surgical  
11 technique on healthcare costs. *Am J Surg.* 2015;210(2):270-5.  
12  
13  
14  
15  
16 128. Mickovic I.N., Z., Golubovic, S., Mickovic, D., Vukovic, S., Trajkovic, S.S.,  
17 Antunovic, et al. A comparative analysis of laparoscopic appendectomy in relation to the  
18 open appendectomy in children. *Uporedna analiza laparoscopske apendektomije u odnosu*  
19 *na otvorenu apendektomiju kod dece.* 2016;17(1):49-53.  
20  
21  
22  
23  
24  
25  
26 129. Ming P.C., T.Y., Yee Yan, L.H., Tat. Risk factors of postoperative infections in adults  
27 with complicated appendicitis. *Surg Laparoscopy Endosc Percutaneous Tech.*  
28 2009;19(3):244-8.  
29  
30  
31  
32  
33 130. Mingmalairak C., P., Ungbhakorn, V., Paocharoen. Efficacy of antimicrobial coating  
34 suture coated polyglactin 910 with tricosan (Vicryl Plus) compared with polyglactin 910  
35 (Vicryl) in reduced surgical site infection of appendicitis, double blind randomized control  
36 trial, preliminary safety report. *J Med Assoc Thailand.* 2009;92(6):770-5.  
37  
38  
39  
40  
41  
42  
43 131. Miyano G., T., Okazaki, Y., Kato, T., Marusasa, T., Takahashi, G.J., Lane, et al. Open  
44 versus laparoscopic treatment for pan-peritonitis secondary to perforated appendicitis in  
45 children: A prospective analysis. *J Laparoendosc Adv Surg Techn.* 2010;20(7):655-7.  
46  
47  
48  
49  
50 132. Moazzez A., R.J., Mason, N., Katkhouda. Thirty-day outcomes of laparoscopic versus  
51 open appendectomy in elderly using ACS/NSQIP database. *Surg Endosc Interv Tech.*  
52 2013;27(4):1061-71.  
53  
54  
55  
56  
57 133. Mohammad Taghi Rajabi-Mashhadi, Mousavi, Seyed Hadi, Khosravi-Mashizi, M. H.,  
58 Ghayour-Mobarhan, Majid, Sahebkar, Amirhossein. Optimum duration of perioperative  
59  
60

- 1  
2  
3 antibiotic therapy in patients with acute non-perforated appendicitis: a prospective  
4 randomized trial. *Asian Biomedicine*. 2012;6(6):891-4.  
5  
6  
7
- 8  
9 134. Monge Jodra V., A., Robustillo Rodela, F., Martin Martinez, N., López Fresneña, S.,  
10 Oña Compán, F., Calbo Torrecillas, et al. Standardized infection ratios for three general  
11 surgery procedures: A comparison between Spanish hospitals and U.S. centers participating  
12 in the national nosocomial infections surveillance system. *Infect Control Hosp Epidemiol*.  
13 2003;24(10):744-8.  
14  
15  
16  
17  
18
- 19 135. Mueck K.M., L.R., Putnam, K.T., Anderson, K.P., Lally, K., Tsao, L.S., Kao. Does  
20 compliance with antibiotic prophylaxis in pediatric simple appendicitis matter? *J Surg Res*.  
21 2017;216:1-8.  
22  
23  
24  
25  
26  
27
- 28 136. Muensterer O.J., C., Puga Nougues, O.O., Adibe, S.R., Amin, K.E., Georgeson, C.M.,  
29 Harmon. Appendectomy using single-incision pediatric endosurgery for acute and  
30 perforated appendicitis. *Surg Endosc Interv Tech*. 2010;24(12):3201-4.  
31  
32  
33  
34  
35
- 36 137. Muensterer O.J., R., Keijzer. A simple vacuum dressing reduces the wound infection  
37 rate of single-incision pediatric endosurgical appendectomy. *J Soc Laparoendoscopic Surg*.  
38 2011;15(2):147-50.  
39  
40  
41  
42
- 43 138. Mustafa M.I.T., S.M., Chaudhry, R.I.T., Mustafa. Comparison of early outcome  
44 between patients of open appendectomy with and without drain for perforated appendicitis.  
45 *Pak J Med Health Sci*. 2016;10(3):890-3.  
46  
47  
48  
49
- 50 139. Nadler E.P., K.K., Reblock, H.R., Ford, B.A., Gaines. Monotherapy versus multi-drug  
51 therapy for the treatment of perforated appendicitis in children. *Surg Infect*. 2003;4(4):327-  
52 33.  
53  
54  
55  
56  
57
- 58 140. Nataraja R.M., A., Bandi, S.A., Clarke, M.J., Haddad. Comparison of intra-abdominal  
59 abscess formation following laparoscopic and open appendectomy in children. *J*  
60

- Laparoendosc Adv Surg Techn. 2010;20(4):391-4.
141. Nataraja R.M., W.J., Teague, J., Galea, L., Moore, M.J., Haddad, T., Tsang, et al. Comparison of intraabdominal abscess formation after laparoscopic and open appendectomies in children. *J Pediatr Surg*. 2012;47(2):317-21.
142. Norton Pérez, Romero, Marcela, Castelblanco, María Isabel, Rodríguez, Emma Isabel. Infección del sitio operatorio de apendicectomías en un hospital de la orinoquia colombiana X1 Surgical site infection following appendectomy at a hospital in the Colombian Orinoco river basin (Colombian Orinoquia). *Revista Colombiana de Cirugía*. 2009;24(1):23-30.
143. Obayashi J., K., Ohyama, S., Manabe, K., Tanaka, H., Nagae, H., Shima, et al. Are there reliable indicators predicting post-operative complications in acute appendicitis? *Pediatr Surg Int*. 2015;31(12):1189-93.
144. Obinwa O., C., Peirce, M., Cassidy, T., Fahey, J., Flynn. A model predicting perforation and complications in paediatric appendectomy. *Int J Colorectal Dis*. 2015;30(4):559-65.
145. Ohene-Yeboah M., B., Togbe. An audit of appendicitis and appendectomy in Kumasi, Ghana. *West Afr J Med*. 2006;25(2):138-43.
146. Okkyung Suh, 신완균, 강성희, 양대현. Appropriate Duration of Prophylactic Antibiotics in Acute Nonperforated Appendicitis Z1 급성 비천공성 충수염 수술시 예방적 항균제의 사용기간. *Korean Journal of Clinical Pharmacy S1 한국임상약학회지*. 2002;12(2):65-70.
147. Francisco Gabriel Onieva, Roldán, Sara, Domínguez, José Ramón, Montero, Juan Pedro, Galnares, Alfonso, Peralta, Jordi. Abordaje laparoscópico frente a enfoque clásico



- 1  
2  
3 en el tratamiento de la apendicitis aguda X1 Laparoscopic approach versus classic open  
4 procedure in the treatment of acute appendicitis. *Revista Colombiana de Cirugía*.  
5 2017;32(1):26-31.  
6  
7  
8  
9
- 10 148. Page A.J., J.D., Pollock, S., Perez, S.S., Davis, E., Lin, J.F., Sweeney. Laparoscopic  
11 Versus Open Appendectomy: An Analysis of Outcomes in 17,199 Patients Using  
12 ACS/NSQIP. *J Gastrointest Surg*. 2010;14(12):1955-62.  
13  
14  
15  
16
- 17 149. Palesty J.A., X.J., Wang, R.C., Rutland, J., Leighton, S.J., Dudrick, A., Benbrahim.  
18 Fifty-five consecutive laparoscopic appendectomy procedures without conversion. *JSLs*.  
19 2004;8(2):141-5.  
20  
21  
22  
23
- 24 150. Pandit R.K. Safe and feasible time limit for early appendectomy in appendiceal mass.  
25 *Kathmandu Univ Med J*. 2016;14(55):210-4.  
26  
27  
28  
29
- 30 151. Parcels J.P., J.P., Mileski, F.T., Gnagy, A.F., Haragan, W.J., Mileski. Using  
31 antimicrobial solution for irrigation in appendicitis to lower surgical site infection rates. *Am*  
32 *J Surg*. 2009;198(6):875-80.  
33  
34  
35  
36  
37  
38  
39  
40
- 41 152. Park H.-C., M.J., Kim, B.H., Lee. Effect of a Standardized Protocol of Antibiotic  
42 Therapy on Surgical Site Infection after Laparoscopic Surgery for Complicated  
43 Appendicitis. *Surg Infect*. 2017;18(6):684-8.  
44  
45  
46  
47  
48
- 49 153. Seongmun Park, Park, Min-Su, Lee, Kil-Yeon. Relationship between the Hospital Visit-  
50 to-Operation Time Interval and the Risk of Appendiceal Perforation and Clinical Outcomes.  
51 *Journal of Minimally Invasive Surgery*. 2018;21(1):31-7.  
52  
53  
54
- 55 154. Reoyo Pascual J.F., R., León Miranda, C., Cartón Hernández, E., Alonso Alonso, R.M.,  
56 Martínez Castro, J., Sánchez Manuel. Laparoscopic appendectomy by 'glove port'  
57 system: Our first 100 cases. *Apendicectomía laparoscópica por sistema «glove port»:*  
58  
59  
60

- 1  
2  
3 nuestros primeros 100 casos. 2017;69(6):467-71.  
4  
5  
6  
7 155. Patrice Lemieux., Pascal Rheaume., Isabelle Levesque., Emmanuel Bujold., Gaetan  
8 Brochu. Laparoscopic appendectomy in pregnant patients: a review of 45 cases. Surg  
9 Endosc.2009; 23:1701.  
10  
11  
12  
13  
14 156. Patel S.C., G.F., Jumba, S., Akmal. Laparoscopic appendicectomy at the Aga Khan  
15 Hospital, Nairobi. East Afr Med J. 2003;80(9):447-51.  
16  
17  
18  
19  
20 157. Percy C., K., Almahmoud, T., Jackson, C., Hartline, A., Cahill, L., Spence, et al. Risky  
21 business? Investigating outcomes of patients undergoing urgent laparoscopic  
22 appendectomy on antithrombotic therapy. Am J Surg. 2017;214(6):1012-5.  
23  
24  
25  
26  
27 158. Pishori T., A.R., Siddiqui, M., Ahmed. Surgical wound infection surveillance in general  
28 surgery procedures at a teaching hospital in Pakistan. Am J Infect Control. 2003;31(5):296-  
29 301.  
30  
31  
32  
33  
34  
35 159. Putnam L.R., T.G., Ostovar-Kermani, A., Le Blanc, K.T., Anderson, G., Holzmann-  
36 Pazgal, K.P., Lally, et al. Surgical site infection reporting: more than meets the agar. J  
37 Pediatr Surg. 2017;52(1):156-60.  
38  
39  
40  
41  
42  
43 160. Al-Qahtani S.M., H.M., Al-Amoudi, S., Al-Jehani, A.S., Ashour, M.R., Abd-Hammad,  
44 O.R., Tawfik, et al. Post-appendectomy surgical site infection rate after using an  
45 antimicrobial film incise drape: A prospective study. Surg Infect. 2015;16(2):155-8.  
46  
47  
48  
49  
50 161. Quezada F., N., Quezada, R., Mejia, A., Brañes, O., Padilla, N., Jarufe, et al.  
51 Laparoscopic versus open approach in the management of appendicitis complicated  
52 exclusively with peritonitis: A single center experience. Int J Surg. 2015;13:80-3.  
53  
54  
55  
56  
57  
58 162. Raakow J., H.-G., Liesaus, P., Neuhaus, R., Raakow. Single-incision versus multiport  
59 laparoscopic appendectomy: a case-matched comparative analysis. Surg Endosc Interv  
60

- 1  
2  
3 Tech. 2015;29(6):1530-6.  
4  
5  
6  
7 163. Ríos J., C., Murillo, G., Carrasco, C., Humet. Increase in costs attributable to surgical  
8 infection after appendicectomy and colectomy. Incremento de costes atribuible a la  
9 infección quirúrgica de la apendicectomía y colectomía. 2003;17(3):218-25.  
10  
11  
12  
13  
14 164. Rafiq M.S., M.M., Khan, A., Khan, H., Jan. Evaluation of postoperative antibiotics after  
15 non-perforated appendectomy. J Pak Med Assoc. 2015;65(8):815-7.  
16  
17  
18  
19  
20  
21  
22 165. Reinisch A., J., Heil, G., Woeste, W., Bechstein, J., Liese. The meteorological influence  
23 on seasonal alterations in the course of acute appendicitis. J Surg Res. 2017;217:137-43.  
24  
25  
26  
27  
28 166. Romano A., P., Parikh, P., Byers, N., Namias. Simple acute appendicitis versus non-  
29 perforated gangrenous appendicitis: Is there a difference in the rate of post-operative  
30 infectious complications? Surg Infect. 2014;15(5):517-20.  
31  
32  
33  
34  
35  
36 167. Romel Hilaire, Fernández, Zenén Rodríguez, García, Lázaro Ibrahim Romero, Sánchez,  
37 Luis Pablo Rodríguez. Apendicectomía videolaparoscópica frente a apendicectomía  
38 convencional X1 Laparoscopic versus conventional appendectomy. Revista Cubana de  
39 Cirugía. 2014;53(1):30-40.  
40  
41  
42  
43  
44  
45 168. Romy S., M.-C., Eisenring, V., Bettschart, C., Petignat, P., Francioli, N., Troillet.  
46 Laparoscope use and surgical site infections in digestive surgery. Ann Surg.  
47 2008;247(4):627-32.  
48  
49  
50  
51  
52  
53 169. Rooh-ul-Muqim, M., Khan, M., Zarin. Experience of laparoscopic appendectomies  
54 versus open appendectomies. Pak J Med Sci. 2010;26(2):324-8.  
55  
56  
57  
58  
59 170. Van Rossem C.C., M.H.F., Schreinemacher, K., Treskes, R.M., Van Hogeand,  
60 A.A.W., Van Geloven. Duration of antibiotic treatment after appendicectomy for acute

- 1  
2  
3 complicated appendicitis. *Br J Surg*. 2014;101(6):715-9.  
4  
5  
6  
7  
8 171. Van Rossem C.C., M.D., Bolmers, M.H., Schreinemacher, A.A., van Geloven, W.A.,  
9 Bemelman. Prospective nationwide outcome audit of surgery for suspected acute  
10 appendicitis. *Br J Surg*. 2016;103(1):144-51.  
11  
12  
13  
14 172. Viet Hung N., T., Anh Thu, V.D., Rosenthal, D., Tat Thanh, N., Quoc Anh, N., Le Bao  
15 Tien, et al. Surgical site infection rates in seven cities in Vietnam: Findings of the  
16 international nosocomial infection control consortium. *Surg Infect*. 2016;17(2):243-9.  
17  
18  
19  
20  
21 173. Rotermann M. Infection after cholecystectomy, hysterectomy or appendectomy. *Health*  
22 *Rep*. 2004;15(4):11-23.  
23  
24  
25  
26 174. Saar S., P., Talving, J., Laos, T., Põdramägi, M., Sokirjanski, T., Lustenberger, et al.  
27 Delay Between Onset of Symptoms and Surgery in Acute Appendicitis Increases  
28 Perioperative Morbidity: A Prospective Study. *World J Surg*. 2016;40(6):1308-14.  
29  
30  
31  
32  
33 175. Saber A.A., M.H., Elgamal, T.H., El-Ghazaly, A.V., Dewoolkar, A., Akl. Simple  
34 technique for single incision transumbilical laparoscopic appendectomy. *Int J Surg*.  
35 2010;8(2):128-30.  
36  
37  
38  
39  
40 176. Sadraei-Moosavi S.-M., N., Nikhbakhsh, A.-A., Darzi. Postoperative antibiotic therapy  
41 after appendectomy in patients with non-perforated appendicitis. *Caspian J Int Med*.  
42 2017;8(2):104-7.  
43  
44  
45  
46  
47 177. Saha N., D.K., Saha, M.A., Rahman, M.K., Islam, M.A., Aziz. Comparison of post  
48 operative morbidity between laparoscopic and open appendectomy in children.  
49 *Mymensingh Med J*. 2010;19(3):348-52.  
50  
51  
52  
53  
54 178. Sahn M., R., Kube, S., Schmidt, C., Ritter, M., Pross, H., Lippert. Current analysis of  
55 endoloops in appendiceal stump closure. *Surg Endosc Interv Tech*. 2011;25(1):124-9.  
56  
57  
58  
59 179. Sahn M., M., Pross, R., Otto, A., Koch, I., Gastinger, H., Lippert. Clinical health service  
60

- 1  
2  
3 research on the surgical therapy of acute appendicitis: Comparison of outcomes based on 3  
4 German multicenter quality assurance studies over 21 years. *Ann Surg.* 2015;262(2):338-  
5 46.  
6  
7  
8  
9
- 10 180. Salö M., E., Järbur, M., Hambræus, B., Ohlsson, P., Stenström, E., Arnbjörnsson. Two-  
11 trocar appendectomy in children - description of technique and comparison with  
12 conventional laparoscopic appendectomy. *BMC Surg.* 2016;16(1):52.  
13  
14  
15  
16
- 17 181. Sánchez-Santana T., J.A., del-Moral-Luque, P., Gil-Yonte, L., Bañuelos-Andrío, M.,  
18 Durán-Poveda, G., Rodríguez-Caravaca. Effect of compliance with an antibiotic  
19 prophylaxis protocol in surgical site infections in appendectomies. Prospective cohort  
20 study. Efecto de la adecuación a protocolo de la profilaxis antibiótica en la incidencia de  
21 infección quirúrgica en apendicectomías Estudio de cohortes prospectivo. 2017;85(3):208-  
22 13.  
23  
24  
25  
26  
27  
28
- 29 182. Sauvain M.-O., K., Slankamenac, M.K., Muller, S., Wildi, U., Metzger, W., Schmid, et  
30 al. Delaying surgery to perform CT scans for suspected appendicitis decreases the rate of  
31 negative appendectomies without increasing the rate of perforation nor postoperative  
32 complications. *Langenbeck's Arch Surg.* 2016;401(5):643-9.  
33  
34  
35  
36  
37  
38
- 39 183. Scarborough J.E., K.M., Bennett, T.N., Pappas. Racial disparities in outcomes after  
40 appendectomy for acute appendicitis. *Am J Surg.* 2012;204(1):11-7.  
41  
42  
43  
44
- 45 184. Seifarth F.G., N., Kundu, A.D., Guerron, M.M., Garland, M.W., Gaffley, S., Worley, et  
46 al. Umbilical Negative Pressure Dressing for Transumbilical Appendectomy in Children.  
47 *JLS.* 2016;20(4).  
48  
49  
50
- 51 185. Federico G. Seifarth, Kundu, Neilendu, Guerron, Alfredo D., Garland, Mary M.,  
52 Gaffley, Michaela W. G., Worley, Sarah, et al. Umbilical Negative Pressure Dressing for  
53 Transumbilical Appendectomy in Children. *JLS-JOURNAL OF THE SOCIETY OF*  
54 *LAPAROENDOSCOPIC SURGEONS.* 2016;20(4).  
55  
56  
57  
58  
59
- 60 186. Senekjian L., R., Nirula. Tailoring the operative approach for appendicitis to the patient:

- 1  
2  
3 A prediction model from national surgical quality improvement program data. *J Am Coll*  
4 *Surg.* 2013;216(1):34-40.  
5  
6  
7  
8  
9 187. Sesia S.B., M., Frech, F.-M., Häcker, J., Mayr. Laparoscopic "single-port"  
10 appendectomy in children. *Laparoskopische "single port"-appendektomie im Kindesalter.*  
11 2011;136(1):50-5.  
12  
13  
14  
15 188. Shaikh A.R., S., Khatoon, M., Arif. Evaluation of re-admission after open  
16 appendectomy. *Rawal Med J.* 2011;36(2):100-3.  
17  
18  
19  
20  
21  
22 189. Shang Q., Q., Geng, X., Zhang, C., Guo. The efficacy of combined therapy with  
23 metronidazole and broad-spectrum antibiotics on postoperative outcomes for pediatric  
24 patients with perforated appendicitis. *Medicine.* 2017;96(47).  
25  
26  
27  
28  
29 190. Shindholimath V., K., Thinakaran, T., Rao, Y., Veerappa. Laparoscopic management  
30 of appendicular mass. *J Minimal Access Surg.* 2011;7(2):136-40.  
31  
32  
33  
34 191. Shimizu T., M., Ishizuka, K., Kubota. The preoperative serum C-reactive protein level  
35 is a useful predictor of surgical site infections in patients undergoing appendectomy. *Surg*  
36 *Today.* 2015;45(11):1404-10.  
37  
38  
39  
40  
41 192. Siam B., A., Al-Kurd, N., Simanovsky, H., Awesat, Y., Cohn, B., Helou, et al.  
42 Comparison of appendectomy outcomes between senior general surgeons and general  
43 surgery residents. *JAMA Surg.* 2017;152(7):679-85.  
44  
45  
46  
47  
48 193. 서승원, 김신곤. Acute Appendicitis in Pregnant Patients and Non-Pregnant Patients:  
49  
50  
51 Recent Clinical Experience of the Tertiary Hospital Z1 임신부와 가임기 여성의 급성  
52  
53  
54  
55  
56  
57  
58  
59  
60  
충수염의 비교 고찰: 최근 3차 병원의 임상적 경험. *Annals of Surgical Treatment and*  
*Research S1 대한외과학회지.* 2002;62(6):486-90.

- 1  
2  
3  
4  
5  
6  
7 194. Alfredo Silva, M, Guido Vargas, A, Amparo Moreno, H, Pablo Becerra. Utilidad del  
8 retractor elástico abdominal para disminuir el riesgo de infección de herida operatoria en  
9 apendicitis aguda X1 Use of an elasticwall retractor during appendectomy to reduce wound  
10 infection. *Revista chilena de cirugía*. 2008;60(6):527-33.  
11  
12  
13  
14  
15 195. Singh V.K., K., Nishant, B., Kharga, A.K., Kalita, P., Bhutia, J., Jain. Randomized  
16 controlled trial comparing open, conventional, and single port laparoscopic appendectomy.  
17 *J Clin Diagn Res*. 2017;11(10):PC05-PC10.  
18  
19  
20  
21  
22  
23  
24 196. Siribumrungwong B., K., Srikuea, A., Thakkinstian. Comparison of superficial surgical  
25 site infection between delayed primary and primary wound closures in ruptured  
26 appendicitis. *Asian J Surg*. 2014;37(3):120-4.  
27  
28  
29  
30  
31 197. Sivrikoz E., E., Karamanos, E., Beale, P., Teixeira, K., Inaba, D., Demetriades. The  
32 effect of diabetes on outcomes following emergency appendectomy in patients without  
33 comorbidities: A propensity score-matched analysis of National Surgical Quality  
34 Improvement Program database. *Am J Surg*. 2015;209(1):206-11.  
35  
36  
37  
38  
39 198. Soll C., P., Wyss, H., Gelpke, D.A., Raptis, S., Breitenstein. Appendiceal stump closure  
40 using polymeric clips reduces intra-abdominal abscesses. *Langenbeck's Arch Surg*.  
41 2016;401(5):661-6.  
42  
43  
44  
45  
46 199. Sozutek A., T., Colak, M., Dirlik, K., Ocal, O., Turkmenoglu, A., Dag. A prospective  
47 randomized comparison of single-port laparoscopic procedure with open and standard 3-  
48 port laparoscopic procedures in the treatment of acute appendicitis. *Surg Laparoscopy*  
49 *Endosc Percutaneous Tech*. 2013;23(1):74-8.  
50  
51  
52  
53  
54 200. Srishewachart P., S., Narksut. Incidence of abnormal preoperative blood testing and  
55 postoperative complication in appendectomy patients in Siriraj Hospital. *J Med Assoc*  
56 *Thailand*. 2016;99(5):517-24.  
57  
58  
59  
60



- 1  
2  
3 201. Staszewicz W., M.-C., Eisenring, V., Bettschart, S., Harbarth, N., Troillet. Thirteen  
4 years of surgical site infection surveillance in Swiss hospitals. *J Hosp Infect.* 2014;88(1):40-  
5 7.  
6  
7  
8  
9  
10 202. Suttie S.A., S., Seth, C.P., Driver, A.A., Mahomed. Outcome after intra- and extra-  
11 corporeal laparoscopic appendectomy techniques. *Surg Endosc.* 2004;18(7):1123-5.  
12  
13  
14  
15 203. Svensson J.F., B., Patkova, M., Almström, S., Eaton, T., Wester. Outcome after  
16 introduction of laparoscopic appendectomy in children: A cohort study. *J Pediatr Surg.*  
17 2016;51(3):449-53.  
18  
19  
20  
21  
22 204. Taguchi Y., S., Komatsu, E., Sakamoto, S., Norimizu, Y., Shingu, H., Hasegawa.  
23 Laparoscopic versus open surgery for complicated appendicitis in adults: a randomized  
24 controlled trial. *Surg Endosc Interv Tech.* 2016;30(5):1705-12.  
25  
26  
27  
28  
29 205. Tanaka S., D., Kubota, S.H., Lee, K., Oba, M., Matsuyama. Effectiveness of  
30 laparoscopic approach for acute appendicitis. *Osaka City Med J.* 2007;53(1):1-8.  
31  
32  
33  
34 206. Tijerina J., R., Velasco-Rodríguez, C., Vásquez, V., Melnikov, S., Rodriguez.  
35 Effectiveness of a systemic antibiotic followed by topical ionized solution as surgical site  
36 infection prophylaxis. *J Int Med Res.* 2010;38(4):1287-93.  
37  
38  
39  
40  
41 207. The SCARLESS Study Group. Single port/incision laparoscopic surgery compared with  
42 standard three-port laparoscopic surgery for appendectomy: A randomized controlled  
43 trial. *Surg Endosc Interv Tech.* 2015;29(1):77-85.  
44  
45  
46  
47  
48 208. Juan Pablo Toro, Barrera, Óscar Javier, Morales, Carlos Hernando. Superioridad clínica  
49 de la apendicectomía laparoscópica sobre la técnica abierta: ¿adopción lenta de un nuevo  
50 estándar de tratamiento? X1 Clinical superiority of laparoscopic appendectomy over the  
51 open technique: sluggish adoption of a new standard of treatment? *Revista Colombiana de*  
52 *Cirugía.* 2017;32(1):32-9.  
53  
54  
55  
56  
57  
58 209. Towfigh S., T., Clarke, W., Yacoub, A.H., Pooli, R.J., Mason, N., Katkhouda, et al.  
59 Significant reduction of wound infections with daily probing of contaminated wounds : A  
60

- 1  
2  
3 prospective randomized clinical trial. *Arch Surg.* 2011;146(4):448-52.  
4  
5  
6  
7 210. Troillet N., E., Aghayev, M.-C., Eisenring, A.F., Widmer. First Results of the Swiss  
8 National Surgical Site Infection Surveillance Program: Who Seeks Shall Find. *Infect*  
9 *Control Hosp Epidemiol.* 2017;38(6):697-704.  
10  
11  
12  
13 211. Tsioplis C., C., Brockschmidt, S., Sander, D., Henne-Bruns, M., Kornmann. Factors  
14 influencing the course of acute appendicitis in adults and children. *Langenbeck's Arch Surg.*  
15 2013;398(6):857-67.  
16  
17  
18  
19  
20 212. Vahdad M.R., M., Nissen, A., Semaan, T., Klein, E., Palade, T., Boemers, et al.  
21 Experiences with LESS-appendectomy in Children. *Arch Iran Med.* 2016;19(1):57-63.  
22  
23  
24  
25 213. Van Rossem C.C., M.H.F., Schreinemacher, A.A.W., Van Geloven, W.A., Bemelman,  
26 G.J.D., Van Acker, B., Akkermans, et al. Antibiotic duration after laparoscopic  
27 appendectomy for acute complicated appendicitis. *JAMA Surg.* 2016;151(4):323-9.  
28  
29  
30  
31  
32 214. Van Rossem C.C., M.H.F., Schreinemacher, K., Treskes, R.M., Van Hogeand,  
33 A.A.W., Van Geloven. Duration of antibiotic treatment after appendectomy for acute  
34 complicated appendicitis. *Br J Surg.* 2014;101(6):715-9.  
35  
36  
37  
38  
39 215. Wang-Chan A., F.H., Hetzer, C., Gingert, C., Gingert, E., Angst, E., Angst, et al.  
40 Clinical relevance and effect of surgical wound classification in appendicitis: Retrospective  
41 evaluation of wound classification discrepancies between surgeons, Swissnosot-trained  
42 infection control nurse, and histology as well as surgical site infection rates by wound class.  
43 *J Surg Res.* 2017;215:132-9.  
44  
45  
46  
47  
48  
49 216. Watanabe A., S., Kohnoe, H., Sonoda, K., Shirabe, K., Fukuzawa, S., Maekawa, et al.  
50 Effect of intra-abdominal absorbable sutures on surgical site infection. *Surg Today.*  
51 2012;42(1):52-9.  
52  
53  
54  
55  
56 217. Willis Z.I., E.M., Duggan, B.T., Bucher, J.B., Pietsch, M., Milovancev, W., Wharton,  
57 et al. Effect of a clinical practice guideline for pediatric complicated appendicitis. *JAMA*  
58 *Surg.* 2016;151(5).  
59  
60

- 1  
2  
3  
4  
5 218. Ramírez-Wong F.M., T., Atencio-Espinoza, V.D., Rosenthal, E., Ramirez, S.L., Torres-  
6 Zegarra, Z.R., Díaz Tavera, et al. Surgical Site Infections Rates in More Than 13,000  
7 Surgical Procedures in Three Cities in Peru: Findings of the International Nosocomial  
8 Infection Control Consortium. *Surg Infect.* 2015;16(5):572-6.  
9  
10  
11  
12  
13 219. Wu J.-M., K.-H., Chen, H.-F., Lin, L.-M., Tseng, S.-H., Tseng, S.-H., Huang.  
14 Laparoscopic appendectomy in pregnancy. *J Laparoendosc Adv Surg Techn Part A.*  
15 2005;15(5):447-50.  
16  
17  
18  
19  
20 220. Wu H.-S., H.-W., Lai, S.-J., Kuo, Y.-T., Lee, D.-R., Chen, C.-W., Chi, et al. Competitive  
21 edge of laparoscopic appendectomy versus open appendectomy: A subgroup comparison  
22 analysis. *J Laparoendosc Adv Surg Techn.* 2011;21(3):197-202.  
23  
24  
25  
26  
27 221. Wu K., L., Yang, A., Wu, J., Wang, S., Xu, H., Zhao, et al. Single-site laparoscopic  
28 appendectomy in children using conventional instruments: a prospective, randomized,  
29 control trial. *Pediatr Surg Int.* 2014;31(2):167-71.  
30  
31  
32  
33  
34 222. Wu T.-C., Q., Lu, Z.-Y., Huang, X.-H., Liang. Efficacy of emergency laparoscopic  
35 appendectomy in treating complicated appendicitis for elderly patients. *Saudi Med J.*  
36 2017;38(11):1108-12.  
37  
38  
39  
40  
41 223. Yaghoubian A., C., de Virgilio, V., Chiu, S.L., Lee. "July effect" and appendicitis. *J*  
42 *Surg Educ.* 2010;67(3):157-60.  
43  
44  
45  
46 224. Yagnik V., J., Rathod, A., Phatak. A retrospective study of two-port appendectomy and  
47 its comparison with open appendectomy and three-port appendectomy. *Saudi J*  
48 *Gastroenterol.* 2010;16(4):268-71.  
49  
50  
51  
52  
53 225. Yousef Y., F., Yousef, M., Homsy, T., Dinh, K., Pandya, H., Stagg, et al.  
54 Standardization of care for pediatric perforated appendicitis improves outcomes. *J Pediatr*  
55 *Surg.* 2017;52(12):1916-20.  
56  
57  
58  
59  
60 226. Zhang Z., Y., Wang, R., Liu, L., Zhao, H., Liu, J., Zhang, et al. Suprapubic single-

1  
2  
3 incision versus conventional laparoscopic appendectomy. J Surg Res. 2016;200(1):131-8.  
4  
5  
6  
7  
8  
9  
10  
11  
12  
13  
14  
15  
16  
17  
18  
19  
20  
21  
22  
23  
24  
25  
26  
27  
28  
29  
30  
31  
32  
33  
34  
35  
36  
37  
38  
39  
40  
41  
42  
43  
44  
45  
46  
47  
48  
49  
50  
51  
52  
53  
54  
55  
56  
57  
58  
59  
60

For peer review only

# BMJ Open

## Global incidence of surgical-site infection after appendectomy: a systematic review and meta-analysis

|                                 |                                                                                                                                                                                                                                                                                                                                                                                                                                                                                                                                                                                                                                                                                                                                                                                                                                                                                                                    |
|---------------------------------|--------------------------------------------------------------------------------------------------------------------------------------------------------------------------------------------------------------------------------------------------------------------------------------------------------------------------------------------------------------------------------------------------------------------------------------------------------------------------------------------------------------------------------------------------------------------------------------------------------------------------------------------------------------------------------------------------------------------------------------------------------------------------------------------------------------------------------------------------------------------------------------------------------------------|
| Journal:                        | <i>BMJ Open</i>                                                                                                                                                                                                                                                                                                                                                                                                                                                                                                                                                                                                                                                                                                                                                                                                                                                                                                    |
| Manuscript ID                   | bmjopen-2019-034266.R2                                                                                                                                                                                                                                                                                                                                                                                                                                                                                                                                                                                                                                                                                                                                                                                                                                                                                             |
| Article Type:                   | Original research                                                                                                                                                                                                                                                                                                                                                                                                                                                                                                                                                                                                                                                                                                                                                                                                                                                                                                  |
| Date Submitted by the Author:   | 06-Jan-2020                                                                                                                                                                                                                                                                                                                                                                                                                                                                                                                                                                                                                                                                                                                                                                                                                                                                                                        |
| Complete List of Authors:       | Danwang, Celestin; Universite Libre de Bruxelles, School of Public Health; University of Yaoundé I, Department of Surgery and Specialties, Faculty of Medicine and Biomedical Sciences<br>Bigna, Jean Joel; Centre Pasteur of Cameroon, Department of Epidemiology and Public Health<br>Tochie, Joel Noutakdie; University of Yaoundé I, Department of Anesthesiology and Critical Care Medicine, Faculty of Medicine and Biomedical Sciences<br>Mbonda, Aimé; Djohong District Hospital, Department of General Medicine<br>Mbanga, Clarence; Mankon Sub-divisional Hospital<br>Nzalie, Rolf ; Ngong District Hospital, North Region, Cameroon<br>Guifo, Marc Leroy ; University of Yaoundé I, Department of Surgery and Specialties, Faculty of Medicine and Biomedical Sciences<br>Essomba, Arthur ; University of Yaoundé I, Department of Surgery and Specialties, Faculty of Medicine and Biomedical Sciences |
| <b>Primary Subject Heading</b>: | Surgery                                                                                                                                                                                                                                                                                                                                                                                                                                                                                                                                                                                                                                                                                                                                                                                                                                                                                                            |
| Secondary Subject Heading:      | Global health, Infectious diseases, Public health                                                                                                                                                                                                                                                                                                                                                                                                                                                                                                                                                                                                                                                                                                                                                                                                                                                                  |
| Keywords:                       | EPIDEMIOLOGY, Health policy < HEALTH SERVICES ADMINISTRATION & MANAGEMENT, Quality in health care < HEALTH SERVICES ADMINISTRATION & MANAGEMENT, Epidemiology < INFECTIOUS DISEASES, Public health < INFECTIOUS DISEASES                                                                                                                                                                                                                                                                                                                                                                                                                                                                                                                                                                                                                                                                                           |
|                                 |                                                                                                                                                                                                                                                                                                                                                                                                                                                                                                                                                                                                                                                                                                                                                                                                                                                                                                                    |

SCHOLARONE™  
Manuscripts



I, the Submitting Author has the right to grant and does grant on behalf of all authors of the Work (as defined in the below author licence), an exclusive licence and/or a non-exclusive licence for contributions from authors who are: i) UK Crown employees; ii) where BMJ has agreed a CC-BY licence shall apply, and/or iii) in accordance with the terms applicable for US Federal Government officers or employees acting as part of their official duties; on a worldwide, perpetual, irrevocable, royalty-free basis to BMJ Publishing Group Ltd ("BMJ") its licensees and where the relevant Journal is co-owned by BMJ to the co-owners of the Journal, to publish the Work in this journal and any other BMJ products and to exploit all rights, as set out in our [licence](#).

The Submitting Author accepts and understands that any supply made under these terms is made by BMJ to the Submitting Author unless you are acting as an employee on behalf of your employer or a postgraduate student of an affiliated institution which is paying any applicable article publishing charge ("APC") for Open Access articles. Where the Submitting Author wishes to make the Work available on an Open Access basis (and intends to pay the relevant APC), the terms of reuse of such Open Access shall be governed by a Creative Commons licence – details of these licences and which [Creative Commons](#) licence will apply to this Work are set out in our licence referred to above.

Other than as permitted in any relevant BMJ Author's Self Archiving Policies, I confirm this Work has not been accepted for publication elsewhere, is not being considered for publication elsewhere and does not duplicate material already published. I confirm all authors consent to publication of this Work and authorise the granting of this licence.

# 1 Global incidence of surgical-site infection after appendectomy: a systematic 2 review and meta-analysis

3 Celestin Danwang<sup>1,2</sup>, Jean Joel Bigna<sup>3\*</sup>, Joel Noutakdie Tochie<sup>4</sup>, Aime Mbonda<sup>5</sup>, Clarence  
4 Mvalo Mbanga<sup>6</sup>, Rolf Nyah Tuku Nzalieu<sup>7</sup>, Marc Leroy Guifo<sup>1</sup>, Arthur Essomba<sup>1</sup>

- 5
- 6 1. Department of Surgery and Specialties, Faculty of Medicine and Biomedical Sciences,  
7 University of Yaoundé I, Yaoundé, Cameroon.
- 8 2. School of Public Health, Université Libre de Bruxelles, Brussels, Belgium.
- 9 3. Department of Epidemiology and Public Health, Centre Pasteur of Cameroon, Yaoundé,  
10 Cameroon.
- 11 4. Department of Anesthesiology and Critical Care Medicine, Faculty of Medicine and Biomedical  
12 Sciences, University of Yaoundé I, Yaoundé, Cameroon.
- 13 5. Department of General Medicine, Djohong District Hospital, Djohong, Cameroon.
- 14 6. Department of General Medicine, Mankon Sub-Divisional Hospital, Bamenda,  
15 Cameroon.
- 16 7. Department of General Medicine, Ngong District Hospital, Ngong, Cameroon.

17  
18 \*Corresponding author: Dr. Jean Joel Bigna, MD, MPH

19 Department of Epidemiology and Public Health, Centre Pasteur of Cameroon, Yaoundé,  
20 Cameroon. E-Mail: [bignarimjj@yahoo.fr](mailto:bignarimjj@yahoo.fr)

21  
22 E-mail addresses:

23 CD: [danram07@yahoo.fr](mailto:danram07@yahoo.fr); JJB: [bignarimjj@yahoo.fr](mailto:bignarimjj@yahoo.fr); JNT: [joeltochie@gmail.com](mailto:joeltochie@gmail.com); AM:  
24 [aimembonda@yahoo.fr](mailto:aimembonda@yahoo.fr); CMM: [mbangaclarence@gmail.com](mailto:mbangaclarence@gmail.com); RNN: [nzalierolf@yahoo.com](mailto:nzalierolf@yahoo.com);  
25 GML: [marcleroyguifo@gmail.com](mailto:marcleroyguifo@gmail.com); AE: [artgessomba@gmail.com](mailto:artgessomba@gmail.com)

26  
27 **Word count:** 2,774.



## 28 **Abstract**

29 **Background:** Although surgical-site infection (SSI) is one of the most studied healthcare-  
30 associated infections, the global burden of SSI after appendectomy remains unknown.

31 **Objectives:** We estimated the incidence of SSI after appendectomy at global and regional  
32 levels.

33 **Design:** Systematic review and meta-analysis.

34 **Participants:** Patients with appendectomy.

35 **Data sources:** EMBASE, PubMed, and Web of Science were searched to identify observational  
36 studies and clinical trials, published between January 1, 2000 and December 30, 2018 and  
37 reporting on the incidence of the SSI after an appendectomy; with no language restriction. A  
38 random-effect models meta-analysis served to obtain the pooled incidence of SSI after 100  
39 surgical procedures in patients with appendectomy.

40 **Results:** In total, 226 studies (729,434 participants from 49 countries) were included in the  
41 meta-analysis. Concerning the methodological quality, 59 (26.1%) studies had a low risk, 147  
42 (65.0%) a moderate risk, and 20 (8.8%) a high risk of bias. We found an overall incidence of  
43 SSIs of 7.0 per 100 surgical procedures (95% prediction interval: 1.0-17.6) for appendectomy  
44 varying from 0 to 37.4 per 100 surgical procedures. Subgroup analysis for identifying sources  
45 of heterogeneity showed that the incidence varied from 5.8 in Europe to 12.6 per 100 surgical  
46 procedures in Africa,  $p < 0.0001$ . The incidence of SSI after appendectomy increased when the  
47 level of income decreased; from 6.2 in high-income countries to 11.1 per 100 surgical  
48 procedures in low-income countries ( $p = 0.015$ ). Open appendectomy (11.0 per 100 surgical  
49 procedures) was found to have a higher incidence of SSI compared to laparoscopy (4.6 per 100  
50 surgical procedures),  $p = 0.0002$ .

1  
2  
3 51 **Conclusion:** This study suggests a high burden of SSIs after appendectomy in some regions  
4  
5 52 (especially Africa) and in low-income countries. Strategies are needed to implement and  
6  
7 53 vulgarize WHO guidelines to decrease the burden of SSI after appendectomy in these regions.  
8  
9

10 54 **Registration:** PROSPERO, CRD42017075257.  
11  
12  
13 55  
14  
15 56  
16

17 57 **Keywords:**

18  
19 58 Surgical wound infection; Global Health; Hospital infections; Cross infection; Healthcare  
20  
21  
22 59 associated infection  
23  
24  
25  
26  
27  
28  
29  
30  
31  
32  
33  
34  
35  
36  
37  
38  
39  
40  
41  
42  
43  
44  
45  
46  
47  
48  
49  
50  
51  
52  
53  
54  
55  
56  
57  
58  
59  
60

## 60 **Strengths and limitations of this study**

- 61 • This meta-analysis is the first to summarize the global incidence of SSIs after  
62 appendectomy.
- 63 • We investigated WHO regions, level of income, and surgical procedure as sources of  
64 heterogeneity.
- 65 • We were not able to investigate all sources of heterogeneity because of missing information  
66 in the original studies.
- 67 • There were few studies from low income countries and from Africa.

## Introduction

Defined as an acute inflammation of the vermiform appendix,<sup>1</sup> evidence abounds that acute appendicitis is the most common abdominal surgical emergency,<sup>2</sup> with an incidence of almost 100 per 100,000 person-years reported in Australia, Europe and North America.<sup>3 4</sup> Evidence suggests appendectomy, a surgical remove of the vermiform appendix as first-line treatment for acute appendicitis, although antibiotic therapy may be efficacious for a selected group of patients with uncomplicated acute appendicitis.<sup>5-7</sup> Appendectomy is a relatively safe surgical intervention with a case fatality rate of 2.1 - 2.4 per 1000 patients as reported in studies conducted in Europe.<sup>8 9</sup>

Innovations in appendectomy, especially with the advent of minimally invasive or laparoscopic surgery in 1983,<sup>10</sup> which has replaced the traditional open appendectomy in most of high-income countries, has led to a drastic reduction in the morbidity and mortality related to appendectomy.<sup>11-13</sup> Laparoscopic appendectomy is now recognized as the gold standard surgical approach for uncomplicated acute appendicitis owing to its merits over open surgery; due to less postoperative pain, reduced postoperative ileus, shorter hospital stay, rapid postoperative recovery, and better aesthetic scars.<sup>14-19</sup>

However, regardless of the surgical technique (laparoscopic or open surgery), appendectomy remains a sceptical surgical intervention associated with a substantial risk of surgical-site infections (SSIs). SSIs after appendectomy are postoperative nosocomial infections affecting the incision site, deep tissues, organs at the operative site within 30 days after the surgical procedure.<sup>20-22</sup> SSI following appendectomy is a serious post-operative medical concern that increases the financial burden for both healthcare systems and patient, and also have a negative impact on the patients' health related quality of life.<sup>23-28</sup>

SSI is both the most frequently studied and the leading healthcare-associated infections reported hospital-wide in low- and middle-income countries.<sup>29</sup> A recently published prospective

1  
2  
3 international multicentre cohort study suggested a high burden of SSIs after any gastrointestinal  
4 surgery in low-income countries compared to high-income countries.<sup>30</sup> Actually, there is no  
5 global systematic review with meta-analysis reporting the burden of SSI after appendectomy or  
6  
7 comparing the burden between regions and between country level of income. It would be  
8 interesting to have such accurately estimated data to construct efficient strategies to curb  
9  
10 globally the burden of SSIs after appendectomy. To fill this gap, the current systematic review  
11 and meta-analysis aimed at summarizing contemporary data on the occurrence of SSIs after  
12  
13 appendectomy.  
14  
15  
16  
17  
18  
19  
20  
21  
22  
23

## 24 **Methods**

### 25 **Design**

26  
27  
28  
29 This systematic review and meta-analysis was registered in the International Prospective  
30 Register of Systematic Reviews (PROSPERO) under the registration number  
31 CRD42017075257. The protocol has been published in a peer-review journal.<sup>31</sup> This review is  
32 reported according to MOOSE and PRISMA guidelines.<sup>32 33</sup>  
33  
34  
35  
36  
37  
38

### 39 **Eligibility criteria**

40  
41 We considered observational studies (cross-sectional, case-control, and cohort) and clinical  
42 trials of patients with appendectomy. Outcome of interest was incidence of SSI of enough data  
43 (number of cases of SSI and sample size) to compute this estimate. We excluded letters,  
44 reviews, commentaries and editorials, and studies lacking key data and/or explicit method  
45 description as well as studies in which relevant data on SSIs after appendectomy was impossible  
46 to extract even after contacting the corresponding author.  
47  
48  
49  
50  
51  
52  
53  
54

### 55 **Search strategy**

1  
2  
3 We searched EMBASE, PubMed, and Web of Science (Web of Science Core Collection,  
4 Current Contents Connect, KCI-Korean Journal Database, SciELO Citation Index, Russian  
5 Science Citation Index) to identify observational studies, published between January 1, 2000  
6 and December 30, 2018. No language restriction was applied. The initial search strategy was  
7 designed for EMBASE and was adapted for the use in other databases. The search strategy as  
8 illustrated in the Supplementary Table 1 and in the study protocol,<sup>31</sup> was based on the  
9 combination of relevant text words and medical subject headings related to SSIs. Moreover, the  
10 references of all relevant articles found were scrutinized for potential additional data sources.  
11 When a full text was not available, it was requested via the corresponding author by email. For  
12 duplicates or studies published in more than one report, the one reporting the largest sample  
13 size was considered.

### 24 **Study selection**

25 Two reviewers (CD and AM) independently screened the titles and abstract of articles for  
26 eligibility. Full texts of potentially eligible articles were retrieved and screened for final  
27 inclusion. Disagreements between the two reviewers were solved by discussion and when a  
28 consensus was not reached, a third reviewer (JNT) resolved discrepancies. Studies in other  
29 languages than French, English, and Spanish were translated using Google Translate.

### 30 **Data extraction and management**

31 A standardized and pretested data extraction form was used by five reviewers (CD, JNT, AM,  
32 RNZ, CMM) to independently extract data from individual studies. A sixth reviewer (JJB)  
33 independently extracted data for accuracy. The last name of the first author, year of publication,  
34 country, study design, age groups, sample size, mean or median age, proportion of males,  
35 specific conditions of the study population, the surgical method (open surgery or laparoscopy),  
36 and incidence of SSIs after appendectomy in the study population (or enough data to compute  
37 this estimate) were extracted.

1  
2  
3 To assess the methodological quality of each study, two reviewers (CD and CMM) used an  
4 adapted version of the tool of bias assessment for prevalence studies developed by Hoy and  
5  
6 colleagues.<sup>34</sup>  
7  
8  
9

### 10 **Data synthesis and analysis**

11  
12  
13 A meta-analysis was used to summarize data concerning incidence of SSIs, by pooling together  
14 data of studies reporting the incidence of SSIs. Study-specific estimates were then pooled  
15 through a Dersimonian and Laird random-effects meta-analysis model to obtain an overall  
16 summary estimate of the incidence across studies, after stabilizing the variance of individual  
17 studies using the Freeman-Tukey double arc-sine transformation.<sup>35</sup> Incidence was expressed by  
18 100 surgical procedures with their 95% confidence interval and 95% prediction interval.  
19  
20 Heterogeneity was evaluated by the  $\chi^2$  test on Q statistic which is quantified by  $I^2$  values,<sup>36</sup>  
21 assuming that  $I^2$  values of 25%, 50% and 75% represent low, medium and high heterogeneity  
22 respectively.<sup>37</sup> Where substantial heterogeneity ( $I^2 > 50\%$ ) was detected, a subgroup analysis  
23 was performed to detect its possible sources using the following grouping variables: type of  
24 surgery (laparoscopy or open), World Health Organization regions, and country level of  
25 income. A  $p$  value  $< 0.05$  was indicative of significant difference. The meta-regression analysis  
26 was performed to estimate the explained heterogeneity of each covariate included in the  
27 subgroup analysis. Inter-rater agreement for study inclusion was assessed using Cohen's  $\kappa$   
28 coefficient.<sup>38</sup> Funnel plots analysis and Egger's test ( $p < 0.10$ ) were performed to detect the  
29 presence of publication bias.<sup>39</sup> Since we believe that the incidence estimates of interest would likely  
30 be published even if substantially different from previously reported estimates, we have not reported  
31 adjusted incidence estimate in the case of publication bias. Data were analysed using the '*meta*' package  
32 in R, version 3.6.1.  
33  
34  
35  
36  
37  
38  
39  
40  
41  
42  
43  
44  
45  
46  
47  
48  
49  
50  
51  
52  
53  
54  
55

### 56 **Patient and public involvement**



1  
2  
3 Patients or the public were not involved in the design, or conduct, or reporting, or dissemination  
4  
5 of our research.  
6  
7  
8  
9

## 10 **Results**

### 11 **Study selection and characteristics**

12  
13 Overall, 619 records were initially identified. After removal of duplicates, screening of study  
14  
15 titles, abstracts, and full texts; 226 studies including 729,434 patients were finally retained for  
16  
17 meta-analysis (Supplementary Figure 1). The full list of included studies is in the Appendix.  
18  
19 Concerning the methodological quality, 59 (26.1%) studies had a low risk, 147 (65.0%) a  
20  
21 moderate risk and 20 (8.8%) a high risk of bias. Supplementary Table 2 presents characteristics  
22  
23 of included studies. Among the included studies, 154 were done in high-income, 36 upper-  
24  
25 middle, 27 lower-middle, and nine in low-income countries. Overall, most of studies were from  
26  
27 Europe (n = 68) and Americas (n = 67). SSIs were defined according to Center of Disease  
28  
29 Control and Prevention criteria in 50 studies while 25 studies used other criteria. The definition  
30  
31 of SSIs was not clearly given in 151 studies. Individuals characteristics of included studies are  
32  
33 in the Supplementary Table 3.  
34  
35  
36  
37  
38  
39

### 40 **Overall prevalence**

41  
42 The overall incidence of SSI after appendectomy was 7.0 per 100 surgical procedures (95%  
43  
44 prediction interval: 1.0-17.6) varying from 0% to 37.4% with substantial heterogeneity and  
45  
46 publication bias (Supplementary Figure 2). The sensitive analysis including only studies with  
47  
48 low risk of bias yielded a very close incidence to crude analysis (Table 1).  
49  
50  
51

### 52 **Sources of heterogeneity**

1  
2  
3 According to country level of income (Figure 1), the incidence of SSI after appendectomy  
4 increased when the level of income decreased; from 6.2 in high income countries to 11.1 per  
5 100 surgical procedures in low income countries ( $p = 0.015$ ) (Table 1).  
6  
7

8  
9  
10 The incidence varied widely across WHO regions (Figure 2). The incidence varied from 5.8 in  
11 Europe to 12.6 per 100 surgical procedures in Africa,  $p < 0.0001$  (Table 1). Two regions  
12 (Europe and Americas) had an incidence  $< 6$  per 100 surgical procedures, three an incidence  
13 between 6-10 per 100 procedures (South-East Asia, Eastern Mediterranean, and Western  
14 Pacific), and one an incidence  $> 10$  per 100 procedures (Africa) (Table 1). The incidence also  
15 varied widely in different regions. The incidence varied from 0.2 to 32.0 in Africa, from 1.9 to  
16 37.4 in Western Pacific, from 1.3 to 33.8 in Eastern Mediterranean, from 1.2 to 25.8 in South-  
17 East Asia, from 0.1 to 37.4 in Americas, and from 0 to 20.0 per 100 surgical procedures in  
18 Europe (Figure 2).  
19  
20  
21  
22  
23  
24  
25  
26  
27  
28  
29

30 Open appendectomy with an incidence of 11.0 (95% prediction interval: 0.0-39.3) per 100  
31 surgical procedures was found to have a higher incidence of SSI compared to laparoscopic  
32 appendectomy with an incidence of 4.6 (95% prediction interval: 0.0-14.3) per 100 surgical  
33 procedures,  $p = 0.0002$  (Figure 3).  
34  
35  
36  
37  
38  
39

40 Heterogeneity of the overall incidence of SSI after appendectomy was explained by WHO  
41 regions (17.1%), country level of income (11.1%), and type of surgical procedure (4.9%). We  
42 conducted a post hoc analysis; then in a meta-regression analysis of 119 studies reporting the  
43 information of the use of antibiotics, there was no association between the variation of SSI  
44 incidence and proportion of patients with the use of antibiotics (coefficient: 0.0010 [95%CI: -  
45 0.0004; 0.0023];  $p = 0.170$ ). however, most (79.5%) of these studies reported using antibiotics  
46 for all patients.  
47  
48  
49  
50  
51  
52  
53  
54  
55  
56  
57

## 58 Discussion

59  
60

1  
2  
3 This first systematic review and meta-analysis of data of 729,434 surgical procedures in 226  
4 studies from 49 countries found an overall incidence of SSIs of 7.0 per 100 surgical procedures  
5 for appendectomy varying from 0 to 37.4 per 100 surgical procedures with substantial  
6 heterogeneity according to WHO regions, country level of income, and type of surgical  
7 procedure. The incidence increased with decreasing country level of income and was higher  
8 when using open surgery compared to laparoscopy. The incidence significantly varied by WHO  
9 regions with Africa having the highest burden followed by Western Pacific, Eastern-  
10 Mediterranean, and South-East Asia. We found no association between SSI incidence and  
11 proportion of using antibiotics.

12  
13  
14  
15  
16  
17  
18  
19  
20  
21  
22  
23  
24 Health care-associated infections are acquired by patients when receiving care and are the most  
25 frequent adverse event affecting patient safety worldwide. This includes SSIs after  
26 appendectomy.<sup>40</sup> As reported in a previous systematic review and meta-analysis, SSIs were the  
27 leading infection in hospitals in developed countries.<sup>29</sup> The high incidence we found in this  
28 study suggests that SSIs after appendectomy remains a global public concern. WHO reported  
29 that of every 100 hospitalized patients at any given time, seven in developed and 15 in  
30 developing countries will acquire at least one health care-associated infection.<sup>40</sup> SSIs are mainly  
31 caused by micro-organisms resistant to commonly-used antimicrobials, which can be  
32 multidrug-resistant. Indeed, more than 50% of SSIs can be antibiotic-resistant.<sup>41</sup> The leading  
33 micro-organisms identified in SSIs are *Staphylococcus aureus*, coagulase-negative  
34 staphylococci, and *Escherichia coli* as reported by National Healthcare Safety Network.<sup>41</sup> It is  
35 important to worry since *Staphylococcus aureus* and *Escherichia coli* are the micro-organisms  
36 with highest proportion of antibiotic resistance, respectively resistant to oxacillin/methicillin in  
37 43% of cases and to fluoroquinolones in 25% of cases.<sup>41</sup> A recent international prospective  
38 cohort study shown that 21.6% of patients with SSI after any gastrointestinal surgery had an  
39 infection that was resistant to the prophylactic antibiotic used.<sup>30</sup> There are many factors that can  
40  
41  
42  
43  
44  
45  
46  
47  
48  
49  
50  
51  
52  
53  
54  
55  
56  
57  
58  
59  
60

1  
2  
3 favour SSI including patient-related and procedural-related variable.<sup>42</sup> These factors can be  
4  
5 classified in two categories; non-modifiable like age and sex and modifiable including  
6  
7 nutritional status, tobacco use, correct use of antibiotics, obesity, diabetes, prolonged surgery  
8  
9 duration, pre-surgery hospital stay of at least two days, lower volume of hospital and surgeons,  
10  
11 and the intraoperative techniques.<sup>40</sup> Strategies to curb the burden of SSIs should therefore focus  
12  
13 on addressing these identified factors. However, we were not able to find an association  
14  
15 between SSI with the use antibiotics, may be due to the low variability in the proportion of  
16  
17 antibiotics in the original studies.  
18  
19

20  
21 In our present study looking at specifically SSI after appendectomy, we also found that SSI was  
22  
23 higher in low income countries. Interestingly, there was a trend with increasing incidence when  
24  
25 the country income decreased. The WHO Africa region essentially constituted with sub-  
26  
27 Saharan Africa was the region with highest incidence in this study. The WHO estimates that  
28  
29 the endemic burden of health care-associated infections is two to three time significantly higher  
30  
31 in low- and middle-income countries than in high-income nations.<sup>40</sup> The highest burden found  
32  
33 in Africa may be associated with the fact most of countries in this continent are low income  
34  
35 countries compared to other regions. Indeed, factors associated with increased risk of SSI after  
36  
37 appendectomy may be higher in low-income settings. The burden of diabetes, obesity, and  
38  
39 undernutrition are increasing in low-income countries.<sup>43 44</sup> There is also inadequate use of  
40  
41 antimicrobial in low- and middle-income countries and micro-organisms are more resistant to  
42  
43 prophylactic antibiotics used to prevent SSI in low-income countries compared to high-income  
44  
45 countries.<sup>30 45 46</sup> Lower level income is also associated with lower volume of surgeon and  
46  
47 hospital, factors recognised as associated increased risk of SSIs.<sup>40</sup> The higher incidence found  
48  
49 in low income countries may also be explained by the fact open surgery is the most used surgical  
50  
51 procedure in this setting. Indeed, we found as in other studies that open surgery is associated  
52  
53 with higher incidence of SSIs compared to laparoscopy.<sup>47 48</sup> Laparoscopy is generally indicated  
54  
55  
56  
57  
58  
59  
60

1  
2  
3 for uncomplicated appendicitis where the dissemination of micro-organism is lower compared  
4  
5 open surgery indicated for perforated appendicitis with peritonitis for example. Moreover, only  
6  
7 few low-income countries have the necessary infrastructure to carry out laparoscopy procedures  
8  
9 compared to high-income countries.<sup>49-51</sup>

10  
11  
12 Our findings have important implications for healthcare providers and health policy makers.  
13  
14 SSIs are among the most preventable healthcare-associated infections.<sup>52-53</sup> They still represent  
15  
16 a significant burden in terms of patient morbidity and mortality and additional costs for  
17  
18 healthcare systems.<sup>40</sup> The prevention of SSI has received considerable attention from surgeons,  
19  
20 infection control professionals, health policy makers, the media and the public since there is a  
21  
22 perception among the public that SSIs may reflect a poor quality of care.<sup>54</sup> However, special  
23  
24 attention is needed for low-income countries and Africa. Strategy to curb the burden of SSIs  
25  
26 after appendectomy as for other surgery procedures should be focused on strategies that can  
27  
28 help to address factors associated with increased risk of SSIs. Therefore, strategies should be a  
29  
30 package including how to address the factors cited above. The 26 WHO recommendations to  
31  
32 avoid SSIs should be vulgarized and implemented,<sup>40</sup> especially in low-income countries.  
33  
34 Strengthening the healthcare systems of low-income countries and of countries in WHO Afro  
35  
36 region is also a paramount by education of healthcare providers and skilling them on the use of  
37  
38 very less invasive surgical procedures.

39  
40 This study should however be interpreted in the context of some drawbacks. Firstly, the same  
41  
42 definition of SSIs was not used by all the included studies. In addition, there were some  
43  
44 heterogeneity according to the surgical procedure and the profile of patients. This may lead to  
45  
46 an overestimation or underestimation of the SSIs incidence by individual studies (depending on  
47  
48 the study characteristics). Secondly, few studies reported on the participants' characteristics  
49  
50 and details on the surgical procedure since this can modify the risk for developing SSIs. We  
51  
52 were not therefore able to measure the impact on our outcome of interest. Thirdly, only a quarter  
53  
54  
55  
56  
57  
58  
59  
60

1  
2  
3 of studies had low risk of bias, however our analysis including only studies with low risk of  
4 bias yielded an estimate close to the crude incidence. Fourth, the various geographic regions  
5 and countries were variably represented, with some countries with only one study or even no  
6 study, which could affect the generalizability of our findings.  
7  
8  
9  
10

11  
12 Despite these limitations, this is the first systematic review and meta-analysis providing a global  
13 estimate of the burden of SSIs after appendectomy. A protocol had been published before, and  
14 we used rigorous methodological and statistical procedures to obtain and pool data.  
15  
16 Furthermore, subgroup analyses were conducted to investigate the various factors likely  
17 affecting our estimate.  
18  
19  
20  
21  
22  
23  
24  
25

## 26 **Conclusion**

27  
28 This systematic review and meta-analysis compiled data from more than 700,000 people with  
29 appendicitis in 49 countries and pointed a high incidence of SSIs after appendectomy, at 7 per  
30 100 surgical procedures. This estimate seemed higher in some WHO regions (especially Africa)  
31 and in low-income countries. These data suggest that less invasive procedure is associated with  
32 low incidence of SSIs after appendectomy. Strategies are needed to implement already known  
33 guidelines to decrease the burden of SSI after appendectomy. However, in low-income  
34 countries which have weak health systems, cost-effectiveness studies are needed to inform  
35 policies regarding the best strategies for decreasing the burden of SSI after appendectomy.  
36  
37  
38  
39  
40  
41  
42  
43  
44  
45  
46  
47  
48

## 49 **Contributors**

50  
51  
52 CD and JJB conceived the idea of the study and developed the protocol. JJB, CD, and JNT did  
53 the literature search. CD, AM, and JNT selected the studies, CD, JNT, RNZ, AM, CMM, JJB  
54 extracted the relevant information. CD, JJB, and CMM synthesized the data. CD, JNT, CMM,  
55 and JJB wrote the first draft of the paper. CD, JJB, JNT, AB, RNZ, CMM, GML, and AE  
56  
57  
58  
59  
60

1  
2  
3 critically revised successive drafts of the paper and approved the final version. GML and AE  
4  
5 supervised the overall work, CD and JJB are the guarantors of the review.  
6

### 7 **Acknowledgements**

8  
9  
10 None.

### 11 **Funding**

12  
13  
14 This research received no specific grant from any funding agency in the public, commercial or  
15  
16 not-for-profit sectors.  
17

### 18 **Competing interests**

19  
20  
21 We declare no competing interests.  
22

### 23 **Patient consent**

24  
25  
26 Not applicable.  
27

### 28 **Data sharing statement**

29  
30  
31 All data generated for this study are in the manuscript and its supporting files.  
32  
33

### 34 **Figures Legend**

35  
36  
37 Figure 1. Global incidence of SSI (surgical site infection) after appendectomy by level of  
38  
39 country income  
40

41  
42 Figure 2. Global incidence of SSI (surgical site infection) after appendectomy by WHO regions  
43

44  
45 Figure 3. Global incidence of SSI (surgical site infection) after appendectomy by type of  
46  
47 surgical procedures  
48

### 49 **References**

- 50  
51  
52  
53  
54 1. Giesen LJX, van den Boom AL, van Rossem CC, et al. Retrospective Multicenter Study on  
55 Risk Factors for Surgical Site Infections after Appendectomy for Acute Appendicitis.  
56 *Dig Surg* 2017;34(2):103-07. doi: 10.1159/000447647 [published Online First: 09/16]  
57  
58 2. Navarro Fernández JA, Tárraga López PJ, Rodríguez Montes JA, et al. Validity of tests  
59 performed to diagnose acute abdominal pain in patients admitted at an emergency  
60



- department. *Rev Esp Enferm Dig* 2009;101(9):610-18. doi: 10.4321/s1130-01082009000900003
3. Ohmann C, Franke C, Kraemer M, et al. Status report on epidemiology of acute appendicitis. *Chirurg* 2002;73(8):769-76. doi: 10.1007/s00104-002-0512-7
4. Körner H, Söreide JA, Pedersen EJ, et al. Stability in incidence of acute appendicitis. A population-based longitudinal study. *Dig Surg* 2001;18(1):61-66. doi: 10.1159/000050099
5. Martínez Carrilero J. Safety and efficacy of antibiotics compared with appendectomy for treatment of uncomplicated acute appendicitis: meta-analysis of randomised controlled trials. *Rev Clin Esp* 2012;212(9):460-60. doi: 10.1016/j.rce.2012.05.005
6. Varadhan KK, Neal KR, Lobo DN. Safety and efficacy of antibiotics compared with appendectomy for treatment of uncomplicated acute appendicitis: meta-analysis of randomised controlled trials. *BMJ (Clinical research ed)* 2012;344:e2156-e56. doi: 10.1136/bmj.e2156
7. Masoomi H, Nguyen NT, Dolich MO, et al. Laparoscopic appendectomy trends and outcomes in the United States: data from the Nationwide Inpatient Sample (NIS), 2004-2011. *Am Surg* 2014;80(10):1074-77.
8. Kotaluoto S, Ukkonen M, Pauniahio S-L, et al. Mortality Related to Appendectomy; a Population Based Analysis over Two Decades in Finland. *World J Surg* 2017;41(1):64-69. doi: 10.1007/s00268-016-3688-6
9. Blomqvist PG, Andersson RE, Granath F, et al. Mortality after appendectomy in Sweden, 1987-1996. *Ann Surg* 2001;233(4):455-60. doi: 10.1097/00000658-200104000-00001
10. Semm K. Endoscopic appendectomy. *Endoscopy* 1983;15(2):59-64. doi: 10.1055/s-2007-1021466
11. Xiao Y, Shi G, Zhang J, et al. Surgical site infection after laparoscopic and open appendectomy: a multicenter large consecutive cohort study. *Surg Endosc* 2015;29(6):1384-93. doi: 10.1007/s00464-014-3809-y [published Online First: 10/11]
12. Varela JE, Wilson SE, Nguyen NT. Laparoscopic surgery significantly reduces surgical-site infections compared with open surgery. *Surg Endosc* 2010;24(2):270-76. doi: 10.1007/s00464-009-0569-1 [published Online First: 06/17]
13. Bregendahl S, Nørgaard M, Laurberg S, et al. Risk of complications and 30-day mortality after laparoscopic and open appendectomy in a Danish region, 1998-2007; a population-based study of 18,426 patients. *Pol Przegl Chir* 2013;85(7):395-400. doi: 10.2478/pjs-2013-0060
14. Sauerland S, Jaschinski T, Neugebauer EA. Laparoscopic versus open surgery for suspected appendicitis. *The Cochrane database of systematic reviews* 2010(10):CD001546-CD46. doi: 10.1002/14651858.CD001546.pub3

15. Aziz O, Athanasiou T, Tekkis PP, et al. Laparoscopic versus open appendectomy in children: a meta-analysis. *Ann Surg* 2006;243(1):17-27. doi: 10.1097/01.sla.0000193602.74417.14
16. Dai L, Shuai J. Laparoscopic versus open appendectomy in adults and children: A meta-analysis of randomized controlled trials. *United European Gastroenterol J* 2017;5(4):542-53. doi: 10.1177/2050640616661931 [published Online First: 08/16]
17. Markides G, Subar D, Riyad K. Laparoscopic versus open appendectomy in adults with complicated appendicitis: systematic review and meta-analysis. *World J Surg* 2010;34(9):2026-40. doi: 10.1007/s00268-010-0669-z
18. Wei B, Qi C-L, Chen T-F, et al. Laparoscopic versus open appendectomy for acute appendicitis: a metaanalysis. *Surg Endosc* 2011;25(4):1199-208. doi: 10.1007/s00464-010-1344-z [published Online First: 09/17]
19. Li X, Zhang J, Sang L, et al. Laparoscopic versus conventional appendectomy--a meta-analysis of randomized controlled trials. *BMC Gastroenterol* 2010;10:129-29. doi: 10.1186/1471-230X-10-129
20. Horan TC, Gaynes RP, Martone WJ, et al. CDC definitions of nosocomial surgical site infections, 1992: a modification of CDC definitions of surgical wound infections. *Am J Infect Control* 1992;20(5):271-74. doi: 10.1016/s0196-6553(05)80201-9
21. Culver DH, Horan TC, Gaynes RP, et al. Surgical wound infection rates by wound class, operative procedure, and patient risk index. National Nosocomial Infections Surveillance System. *Am J Med* 1991;91(3B):152S-57S. doi: 10.1016/0002-9343(91)90361-z
22. Horan TC, Andrus M, Dudeck MA. CDC/NHSN surveillance definition of health care-associated infection and criteria for specific types of infections in the acute care setting. *Am J Infect Control* 2008;36(5):309-32. doi: 10.1016/j.ajic.2008.03.002
23. Badia JM, Casey AL, Petrosillo N, et al. Impact of surgical site infection on healthcare costs and patient outcomes: a systematic review in six European countries. *J Hosp Infect* 2017;96(1):1-15. doi: 10.1016/j.jhin.2017.03.004 [published Online First: 03/08]
24. Thompson KM, Oldenburg WA, Deschamps C, et al. Chasing zero: the drive to eliminate surgical site infections. *Ann Surg* 2011;254(3):430-37. doi: 10.1097/SLA.0b013e31822cc0ad
25. Hawn MT, Vick CC, Richman J, et al. Surgical site infection prevention: time to move beyond the surgical care improvement program. *Ann Surg* 2011;254(3):494-501. doi: 10.1097/SLA.0b013e31822c6929
26. Mehta JA, Sable SA, Nagral S. Updated recommendations for control of surgical site infections. *Ann Surg* 2015;261(3):e65-e65. doi: 10.1097/SLA.0b013e318289c5fd
27. Andersson RE. Short-term complications and long-term morbidity of laparoscopic and open appendectomy in a national cohort. *Br J Surg* 2014;101(9):1135-42. doi: 10.1002/bjs.9552 [published Online First: 06/30]

- 1  
2  
3 28. Pinkney TD, Calvert M, Bartlett DC, et al. Impact of wound edge protection devices on  
4 surgical site infection after laparotomy: multicentre randomised controlled trial  
5 (ROSSINI Trial). *BMJ (Clinical research ed)* 2013;347:f4305-f05. doi:  
6 10.1136/bmj.f4305  
7
- 8  
9 29. Allegranzi B, Bagheri Nejad S, Combescure C, et al. Burden of endemic health-care-  
10 associated infection in developing countries: systematic review and meta-analysis.  
11 *Lancet (London, England)* 2011;377(9761):228-41. doi: 10.1016/S0140-  
12 6736(10)61458-4 [published Online First: 12/09]  
13
- 14  
15 30. GlobalSurg Collaborative. Surgical site infection after gastrointestinal surgery in high-  
16 income, middle-income, and low-income countries: a prospective, international,  
17 multicentre cohort study. *Lancet Infect Dis* 2018;18(5):516-25. doi: 10.1016/S1473-  
18 3099(18)30101-4 [published Online First: 02/13]  
19
- 20  
21 31. Danwang C, Mazou TN, Tochie JN, et al. Global prevalence and incidence of surgical site  
22 infections after appendectomy: a systematic review and meta-analysis protocol. *BMJ*  
23 *open* 2018;8(8):e020101-e01. doi: 10.1136/bmjopen-2017-020101  
24
- 25  
26 32. Stroup DF, Berlin JA, Morton SC, et al. Meta-analysis of observational studies in  
27 epidemiology: a proposal for reporting. Meta-analysis Of Observational Studies in  
28 Epidemiology (MOOSE) group. *JAMA* 2000;283(15):2008-12. doi:  
29 10.1001/jama.283.15.2008  
30
- 31  
32 33. Liberati A, Altman DG, Tetzlaff J, et al. The PRISMA statement for reporting systematic  
33 reviews and meta-analyses of studies that evaluate healthcare interventions: explanation  
34 and elaboration. *BMJ* 2009;339:b2700-b00. doi: 10.1136/bmj.b2700  
35
- 36  
37 34. Hoy D, Brooks P, Woolf A, et al. Assessing risk of bias in prevalence studies: modification  
38 of an existing tool and evidence of interrater agreement. *J Clin Epidemiol*  
39 2012;65(9):934-9. doi: 10.1016/j.jclinepi.2011.11.014 [published Online First:  
40 2012/06/30]  
41
- 42  
43 35. Barendregt JJ, Doi SA, Lee YY, et al. Meta-analysis of prevalence. *Journal of epidemiology*  
44 *and community health* 2013;67(11):974-78. doi: 10.1136/jech-2013-203104 [published  
45 Online First: 08/20]  
46
- 47  
48 36. Cochran WG. The Combination of Estimates from Different Experiments. *Biometrics*  
49 1954;10(1):101-29.  
50
- 51  
52 37. Higgins JPT, Thompson SG, Deeks JJ, et al. Measuring inconsistency in meta-analyses.  
53 *BMJ (Clinical research ed)* 2003;327(7414):557-60. doi: 10.1136/bmj.327.7414.557  
54
- 55  
56 38. Viera AJ, Garrett JM. Understanding interobserver agreement: the kappa statistic. *Fam Med*  
57 2005;37(5):360-63.  
58
- 59  
60 39. Egger M, Davey Smith G, Schneider M, et al. Bias in meta-analysis detected by a simple,  
graphical test. *BMJ (Clinical research ed)* 1997;315(7109):629-34. doi:  
10.1136/bmj.315.7109.629 [published Online First: 1997/10/06]

- 1  
2  
3 40. WHO. Global guidelines on the prevention of surgical site infection: WHO; 2016 [Available  
4 from: [https://apps.who.int/iris/bitstream/handle/10665/250680/9789241549882-](https://apps.who.int/iris/bitstream/handle/10665/250680/9789241549882-eng.pdf?sequence=8)  
5 [eng.pdf?sequence=8](https://apps.who.int/iris/bitstream/handle/10665/250680/9789241549882-eng.pdf?sequence=8) accessed Nov 23 2019.  
6  
7  
8 41. Sievert DM, Ricks P, Edwards JR, et al. Antimicrobial-resistant pathogens associated with  
9 healthcare-associated infections: summary of data reported to the National Healthcare  
10 Safety Network at the Centers for Disease Control and Prevention, 2009-2010. *Infect*  
11 *Control Hosp Epidemiol* 2013;34(1):1-14. doi: 10.1086/668770 [published Online First:  
12 11/27]  
13  
14 42. Buggy D. Can anaesthetic management influence surgical-wound healing? *Lancet (London,*  
15 *England)* 2000;356(9227):355-57. doi: 10.1016/S0140-6736(00)02523-X  
16  
17 43. Seidell JC, Halberstadt J. The global burden of obesity and the challenges of prevention.  
18 *Ann Nutr Metab* 2015;66 Suppl 2:7-12. doi: 10.1159/000375143 [published Online  
19 First: 06/02]  
20  
21 44. Checkley W, Ghannem H, Irazola V, et al. Management of NCD in low- and middle-income  
22 countries. *Glob Heart* 2014;9(4):431-43. doi: 10.1016/j.ghheart.2014.11.003  
23  
24 45. Versporten A, Zarb P, Caniaux I, et al. Antimicrobial consumption and resistance in adult  
25 hospital inpatients in 53 countries: results of an internet-based global point prevalence  
26 survey. *Lancet Glob Health* 2018;6(6):e619-e29. doi: 10.1016/S2214-109X(18)30186-  
27 4 [published Online First: 04/23]  
28  
29 46. Klein EY, Van Boeckel TP, Martinez EM, et al. Global increase and geographic  
30 convergence in antibiotic consumption between 2000 and 2015. *Proceedings of the*  
31 *National Academy of Sciences of the United States of America* 2018;115(15):E3463-  
32 E70. doi: 10.1073/pnas.1717295115 [published Online First: 03/26]  
33  
34 47. Foster D, Kethman W, Cai LZ, et al. Surgical Site Infections after Appendectomy  
35 Performed in Low and Middle Human Development-Index Countries: A Systematic  
36 Review. *Surg Infect (Larchmt)* 2018;19(3):237-44. doi: 10.1089/sur.2017.188  
37 [published Online First: 10/23]  
38  
39 48. Marchi M, Pan A, Gagliotti C, et al. The Italian national surgical site infection surveillance  
40 programme and its positive impact, 2009 to 2011. *Euro Surveill* 2014;19(21):20815.  
41 doi: 10.2807/1560-7917.es2014.19.21.20815  
42  
43 49. Udwardia TE. Diagnostic laparoscopy. *Surg Endosc* 2004;18(1):6-10. doi: 10.1007/s00464-  
44 002-8872-0 [published Online First: 09/10]  
45  
46 50. Adisa AO, Lawal OO, Arowolo OA, et al. Local adaptations aid establishment of  
47 laparoscopic surgery in a semiurban Nigerian hospital. *Surg Endosc* 2013;27(2):390-  
48 93. doi: 10.1007/s00464-012-2463-5 [published Online First: 07/18]  
49  
50 51. Alfa-Wali M, Osaghae S. Practice, training and safety of laparoscopic surgery in low and  
51 middle-income countries. *World J Gastrointest Surg* 2017;9(1):13-18. doi:  
52 10.4240/wjgs.v9.i1.13  
53  
54  
55  
56  
57  
58  
59  
60

- 1  
2  
3 52. Haley RW, Culver DH, White JW, et al. The efficacy of infection surveillance and control  
4 programs in preventing nosocomial infections in US hospitals. *American journal of*  
5 *epidemiology* 1985;121(2):182-205. doi: 10.1093/oxfordjournals.aje.a113990  
6  
7  
8 53. Harbarth S, Sax H, Gastmeier P. The preventable proportion of nosocomial infections: an  
9 overview of published reports. *J Hosp Infect* 2003;54(4):258-321. doi: 10.1016/s0195-  
10 6701(03)00150-6  
11  
12 54. Birgand G, Lepelletier D, Baron G, et al. Agreement among healthcare professionals in ten  
13 European countries in diagnosing case-vignettes of surgical-site infections. *PloS one*  
14 2013;8(7):e68618-e18. doi: 10.1371/journal.pone.0068618  
15  
16  
17  
18  
19  
20  
21  
22  
23  
24  
25  
26  
27  
28  
29  
30  
31  
32  
33  
34  
35  
36  
37  
38  
39  
40  
41  
42  
43  
44  
45  
46  
47  
48  
49  
50  
51  
52  
53  
54  
55  
56  
57  
58  
59  
60

For peer review only

**Table 1. Summary statistics of meta-analysis incidence of surgery site infections after appendectomy**

|                                      | Incidence per 100 surgical procedures (95%CI) | 95% Prediction interval | N studies | N participants | H (95%CI)        | I <sup>2</sup> (95%CI) | P heterogeneity | P Egger test | P difference |
|--------------------------------------|-----------------------------------------------|-------------------------|-----------|----------------|------------------|------------------------|-----------------|--------------|--------------|
| <b>Global</b>                        | 7.0 (6.4-7.7)                                 | 1.0-17.7                | 226       | 729,434        | 8.9 (8.7-9.1)    | 98.7 (98.7-98.8)       | < 0.0001        | < 0.0001     | -            |
| - Low risk of bias                   | 6.9 (6.0-7.9)                                 | 1.6-15.2                | 59        | 204,450        | 6.7 (6.3-7.1)    | 97.7 (97.4-98.0)       | < 0.0001        | < 0.0001     | -            |
| <b>By Level of income</b>            |                                               |                         |           |                |                  |                        |                 |              |              |
| - Low                                | 11.1 (5.5-18.2)                               | 0.0-42.2                | 9         | 1,496          | 3.8 (3.0-4.8)    | 93.1 (89.0-95.6)       | < 0.0001        | 0.735        | 0.015        |
| - Lower-middle                       | 9.2 (6.3-12.6)                                | 0.0-31.6                | 27        | 10,379         | 5.1 (4.6-5.7)    | 96.2 (95.3-96.9)       | < 0.0001        | 0.960        |              |
| - Upper-middle                       | 8.5 (6.5-10.8)                                | 0.3-25.3                | 36        | 26,557         | 5.4 (2.9-5.9)    | 96.6 (95.9-97.1)       | < 0.0001        | 0.392        |              |
| - High                               | 6.2 (5.6-6.9)                                 | 0.9-15.3                | 154       | 691,002        | 9.5 (9.2-9.8)    | 98.9 (98.8-99.0)       | < 0.0001        | < 0.0001     |              |
| <b>By WHO regions</b>                |                                               |                         |           |                |                  |                        |                 |              |              |
| - Africa                             | 12.6 (3.3-26.4)                               | 0.0-72.5                | 8         | 3,001          | 9.1 (7.9-10.5)   | 98.8 (98.4-99.1)       | < 0.0001        | 0.628        | < 0.0001     |
| - Western Pacific                    | 9.6 (8.1-11.2)                                | 2.3-20.8                | 43        | 30,822         | 3.8 (3.5-4.2)    | 93.2 (91.7-94.4)       | < 0.0001        | 0.150        |              |
| - Eastern Mediterranean              | 8.2 (6.4-10.2)                                | 1.7-18.6                | 23        | 7,779          | 2.6 (2.2-3.1)    | 85.3 (79.1-89.6)       | < 0.0001        | 0.515        |              |
| - South-East Asia                    | 7.6 (4.7-11.1)                                | 0.0-24.6                | 16        | 5,782          | 3.8 (3.2-4.5)    | 93.0 (90.1-95.0)       | < 0.0001        | 0.0001       |              |
| - Americas                           | 5.9 (5.2-6.6)                                 | 1.9-11.7                | 67        | 401,931        | 7.5 (7.1-7.9)    | 98.2 (98.0-98.4)       | < 0.0001        | 0.0004       |              |
| - Europe                             | 5.8 (4.6-7.0)                                 | 0.0-19.1                | 68        | 276,793        | 10.4 (10.0-10.8) | 99.1 (99.0-99.1)       | < 0.0001        | < 0.0001     |              |
| <b>By type of surgical procedure</b> |                                               |                         |           |                |                  |                        |                 |              |              |
| - Laparoscopy with open surgery      | 4.6 (2.5-7.2)                                 | 0.0-15.6                | 10        | 4,892          | 3.2 (2.6-4.2)    | 90.7 (85.0-94.2)       | < 0.0001        | 0.942        | 0.0002       |
| - Laparoscopy                        | 4.6 (3.4-5.9)                                 | 0.0-14.3                | 40        | 33,873         | 4.4 (4.0-4.8)    | 94.7 (93.6-95.7)       | < 0.0001        | 0.0002       |              |
| - Open surgery                       | 11.0 (7.9-14.4)                               | 0.0-39.3                | 44        | 13,120         | 5.7 (5.2-6.1)    | 96.9 (96.4-97.3)       | < 0.0001        | 0.077        |              |

WHO: World Health Organization; CI: confidence interval; H: H statistics



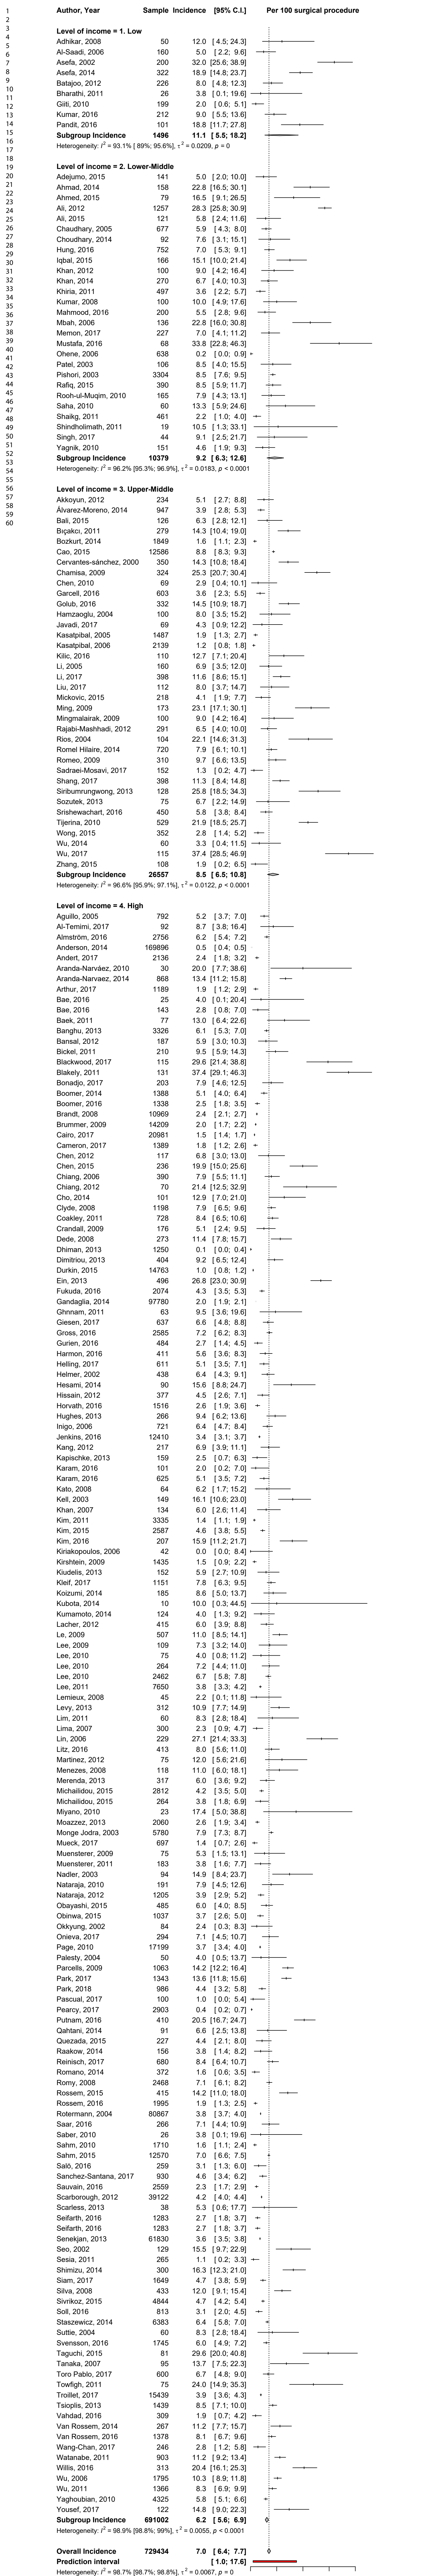



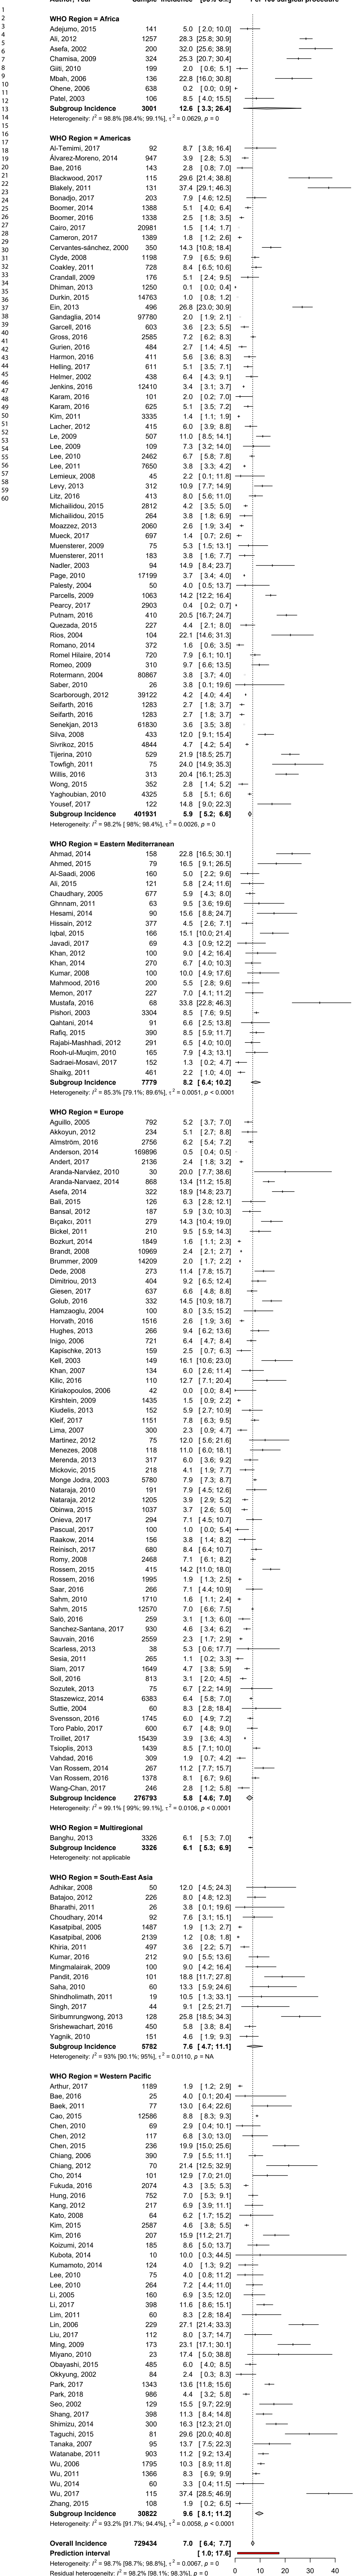

1  
2  
3  
4  
5  
6  
7  
8  
9  
10  
11  
12  
13  
14  
15  
16  
17  
18  
19  
20  
21  
22  
23  
24  
25  
26  
27  
28  
29  
30  
31  
32  
33  
34  
35  
36  
37  
38  
39  
40  
41  
42  
43  
44  
45  
46  
47  
48  
49  
50  
51  
52  
53  
54  
55  
56  
57  
58  
59  
60

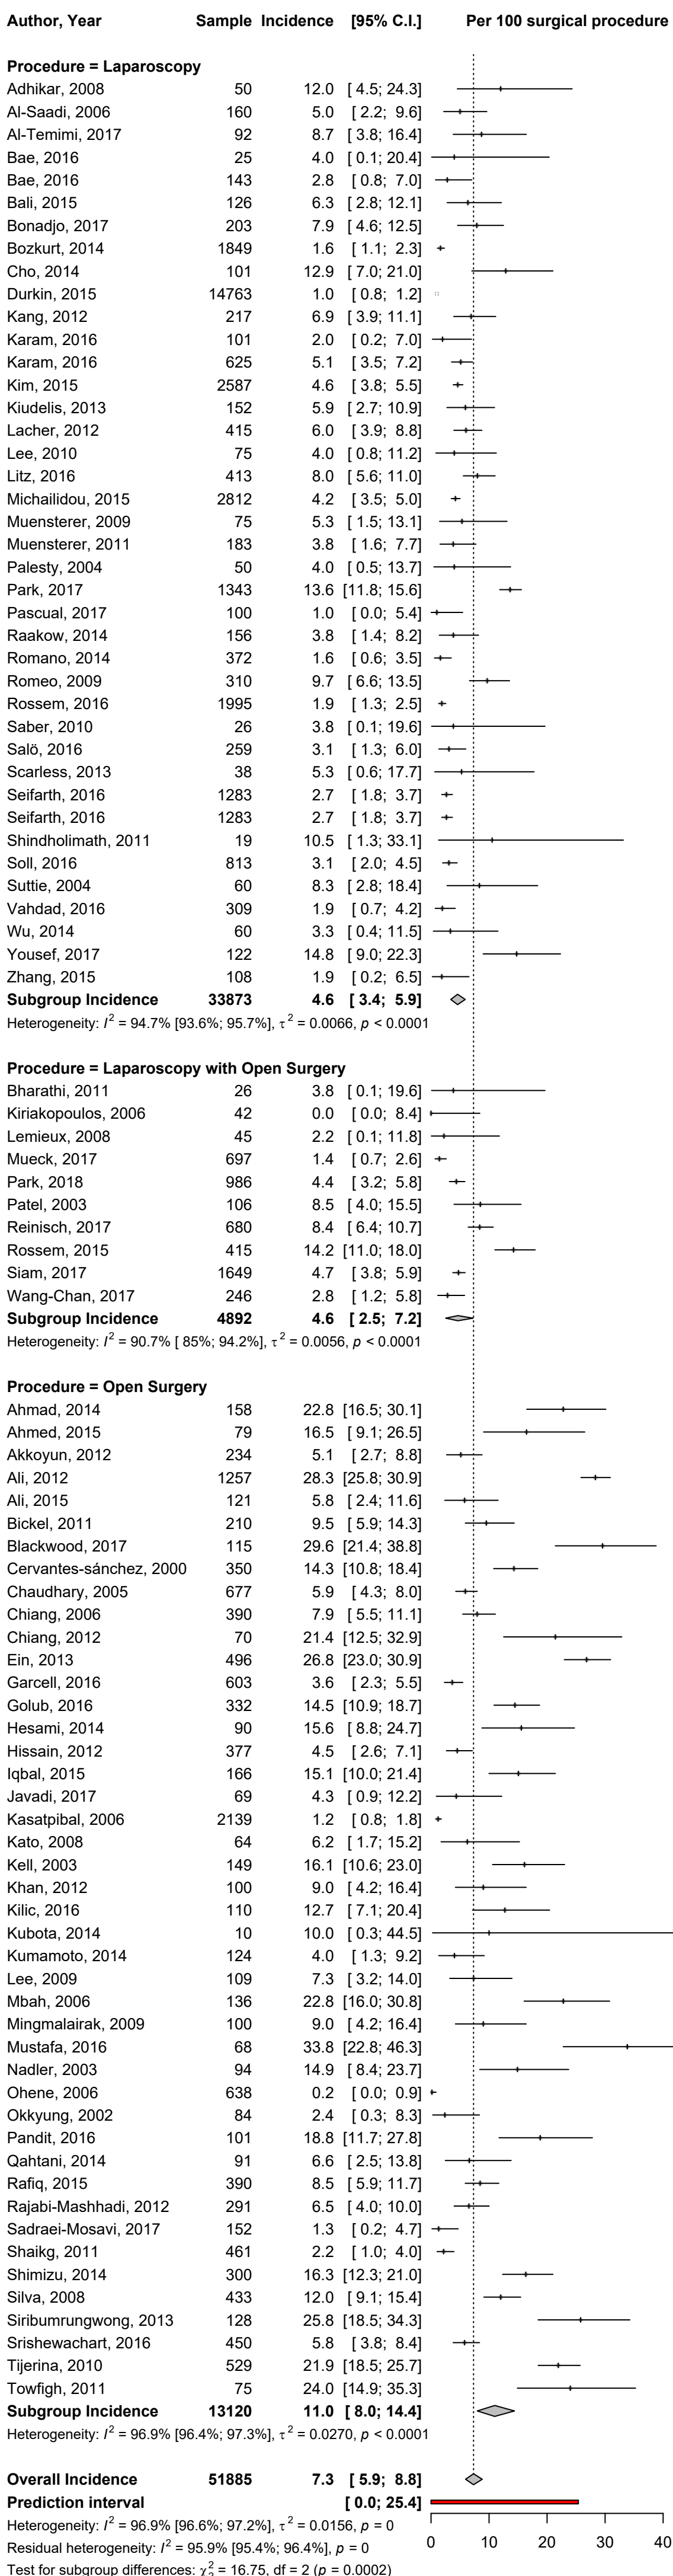

# Global incidence of surgical-site infection after appendectomy: a systematic review and meta-analysis

## APPENDIX

---

Celestin **Danwang**, Jean Joel **Bigna**, Joel Noutakdie **Tochie**,  
 Aime **Mbonda**, Clarence Mvalo **Mbanga**, Rolf Nyah Tuku **Nzalie**,  
 Marc Leroy **Guifo**, Arthur **Essomba**

|                                                                             |    |
|-----------------------------------------------------------------------------|----|
| Supplementary Figure 1. Study flow .....                                    | 2  |
| Supplementary Figure 2. Funnel plot for publication bias .....              | 3  |
| Supplementary Table 1. Search strategy in EMBASE .....                      | 4  |
| Supplementary Table 2 : Characteristics of included studies .....           | 5  |
| Supplementary Table 3. Individual characteristics of included studies ..... | 7  |
| Reference list of included studies.....                                     | 23 |





Supplementary Figure 1. Study flow

review only

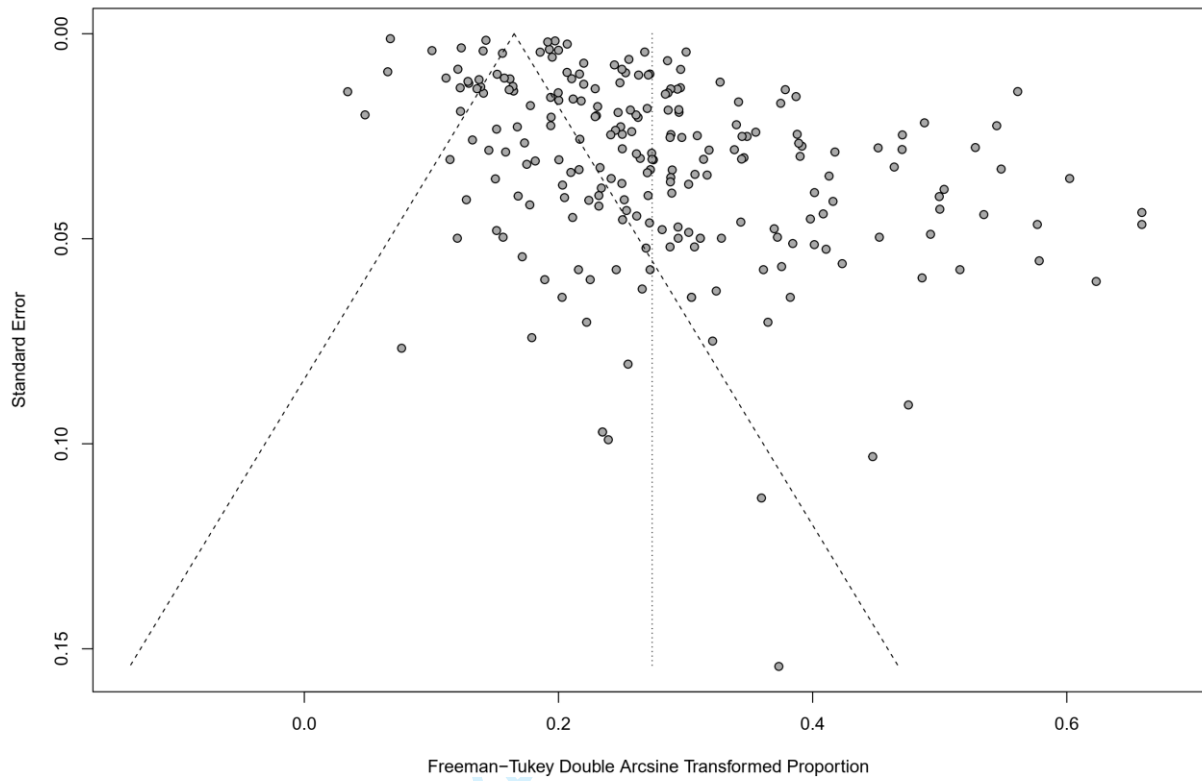

Supplementary Figure 2. Funnel plot for publication bias

Supplementary Table 1. Search strategy in EMBASE

|           | <b>Search terms</b>                                                                                                                                                                                                                                                                                                                                                                                             |
|-----------|-----------------------------------------------------------------------------------------------------------------------------------------------------------------------------------------------------------------------------------------------------------------------------------------------------------------------------------------------------------------------------------------------------------------|
| <b>#1</b> | 'appendectomy'/exp OR appendectomy OR 'appendicectomy'/exp OR appendicectomy OR appendices OR 'appendix epiploica' OR 'omental appendix' OR 'appendicitis'/exp OR appendicitis                                                                                                                                                                                                                                  |
| <b>#2</b> | 'surgical site infection'/exp OR 'surgical site infection' OR 'surgical wound infection'/exp OR 'surgical wound infection' OR 'surgical wound infections'/exp OR 'surgical wound infections' OR 'surgical site infections' OR 'operative site infections' OR 'postoperative wound infections'/exp OR 'postoperative wound infections' OR 'postoperative wound infection'/exp OR 'postoperative wound infection' |
| <b>#3</b> | [2000-2018]/py                                                                                                                                                                                                                                                                                                                                                                                                  |
| <b>#4</b> | #1 AND #2 AND #3                                                                                                                                                                                                                                                                                                                                                                                                |

Supplementary Table 2 : Characteristics of included studies

| Characteristics            | N = 226         |
|----------------------------|-----------------|
| Year of publication, range | 2000-2018       |
| %Male, range               | 0-100 (n = 195) |
| Mean/median age, range     | 7-74 (n = 186)  |
| %HIV                       | 0-13.1 (n = 2)  |
| %Diabetes                  | 0-95.7 (n = 34) |
| %Obesity                   | 0-7.4 (n = 18)  |
| Design, n                  |                 |
| - Cross sectional          | 120             |
| - Cohort study             | 99              |
| - Case control             | 7               |
| WHO regions, n             |                 |
| - Africa                   | 8               |
| - Americas                 | 67              |
| - Eastern Mediterranean    | 23              |
| - Europe                   | 68              |
| - Multiregional            | 1               |
| - South-East Asia          | 16              |
| - Western Pacific          | 43              |
| Level of income, n         |                 |
| - Low                      | 9               |
| - Lower-middle             | 27              |
| - Upper-middle             | 36              |
| - High                     | 154             |
| Timing of data collection  |                 |
| - Retrospective            | 123             |
| - Prospective              | 101             |
| - Unclear                  | 2               |
| Sampling                   |                 |



|    |                                                                    |                    |
|----|--------------------------------------------------------------------|--------------------|
| 1  |                                                                    |                    |
| 2  |                                                                    |                    |
| 3  | - Consecutive                                                      | 131                |
| 4  |                                                                    |                    |
| 5  | - Systematic                                                       | 37                 |
| 6  |                                                                    |                    |
| 7  | - Random                                                           | 32                 |
| 8  |                                                                    |                    |
| 9  | - Exhaustive                                                       | 11                 |
| 10 |                                                                    |                    |
| 11 | - Unclear                                                          | 15                 |
| 12 |                                                                    |                    |
| 13 | Number of sites                                                    |                    |
| 14 |                                                                    |                    |
| 15 | - Multisite                                                        | 51                 |
| 16 |                                                                    |                    |
| 17 | - One site                                                         | 170                |
| 18 |                                                                    |                    |
| 19 | - Unclear                                                          | 5                  |
| 20 |                                                                    |                    |
| 21 | Pattern of appendicitis, range                                     |                    |
| 22 |                                                                    |                    |
| 23 | - %Catarrhal                                                       | 0-100 (n = 84)     |
| 24 |                                                                    |                    |
| 25 | - %Perforated                                                      | 0-100 (n = 110)    |
| 26 |                                                                    |                    |
| 27 | - %Suppurated                                                      | 0-100 (n = 70)     |
| 28 |                                                                    |                    |
| 29 | - %Gangrenous                                                      | 0-46.7 (n = 89)    |
| 30 | %With administered antibiotics                                     | 24.1-100 (n = 109) |
| 31 |                                                                    |                    |
| 32 | %With administered analgesics                                      | 64.5-100 (n = 20)  |
| 33 |                                                                    |                    |
| 34 | %With diet > 6 or 8 hours                                          | 50-100 (n = 3)     |
| 35 |                                                                    |                    |
| 36 | Type of surgery                                                    |                    |
| 37 |                                                                    |                    |
| 38 | - %Open surgery                                                    | 0-100 (n = 134)    |
| 39 |                                                                    |                    |
| 40 | - %Laparoscopy                                                     | 0-100 (n = 187)    |
| 41 |                                                                    |                    |
| 42 | Mean/median time to complete the<br>intervention (in hours), range | 0.1-2.2 (n = 106)  |
| 43 |                                                                    |                    |
| 44 | Type of anesthesia, n                                              |                    |
| 45 |                                                                    |                    |
| 46 | - General                                                          | 118                |
| 47 |                                                                    |                    |
| 48 | - Spinal and general                                               | 2                  |
| 49 |                                                                    |                    |
| 50 | - Unclear                                                          | 106                |
| 51 |                                                                    |                    |
| 52 | SSI definition, n                                                  |                    |
| 53 |                                                                    |                    |
| 54 | - CDC-NNIS criteria                                                | 50                 |
| 55 |                                                                    |                    |
| 56 | - Other criteria                                                   | 25                 |
| 57 |                                                                    |                    |
| 58 | - Not reported/Unclear                                             | 151                |
| 59 |                                                                    |                    |
| 60 |                                                                    |                    |

Supplementary Table 3. Individual characteristics of included studies

| Author              | Year | Risk of bias | Design          | Country  | Timing               | Sampling method | Sites     | Period    | Population                             | %Male | Mean or median age | %Obesity | Pattern of appendicitis                               | %Catarrhal | %Perforated | %Suppurated | %Gangrenous | % with antibiotic therapy | Type of surgery             | Time to complete the surgery intervention (in hours) | Type of anesthesia | SSI Definition                            | Sample |
|---------------------|------|--------------|-----------------|----------|----------------------|-----------------|-----------|-----------|----------------------------------------|-------|--------------------|----------|-------------------------------------------------------|------------|-------------|-------------|-------------|---------------------------|-----------------------------|------------------------------------------------------|--------------------|-------------------------------------------|--------|
| Adejumo (1)         | 2015 | Moderate     | Cohort          | Nigeria  | Retrospective        | Consecutive     | One site  | 2007-2014 | Adults                                 | 39    | 26                 | NR       | Catarrhal, Perforated, Suppurated, Gangrenous         | 48.9       | NR          | NR          | NR          | 100                       | NR                          | NR                                                   | NR                 | NR                                        | 141    |
| Aguillo (2)         | 2005 | Moderate     | Cohort          | Spain    | Prospective          | Consecutive     | Unclear   | NR        | Children, Adolescents, Adults, Elderly | 63.1  | NR                 | NR       | Unclear                                               | NR         | NR          | NR          | NR          | 100                       | NR                          | NR                                                   | NR                 | NR                                        | 792    |
| Adhikar (3)         | 2008 | Moderate     | Cohort          | Nepal    | Prospective          | Consecutive     | One site  | 2005-2006 | Children, Adolescents, Adults, Elderly | NR    | NR                 | NR       | Unclear                                               | NR         | NR          | NR          | NR          | 100                       | Laparoscopy                 | 0.5                                                  | General            | NR                                        | 50     |
| Ahmad(4)            | 2014 | Moderate     | Clinical trial  | Pakistan | Prospective          | Consecutive     | One site  | 2012      | Adults                                 | 35.4  | 27.4               | NR       | Perforated                                            | 0          | 100         | 0           | 0           | 100                       | Open Surgery                | NR                                                   | General            | NR                                        | 158    |
| Ahmed (5)           | 2015 | Moderate     | Cross sectional | Pakistan | Retrospective        | Consecutive     | One site  | 2009-2010 | Children, Adolescents                  | 51.89 | 10.1               | NR       | Unclear                                               | NR         | NR          | NR          | NR          | 100                       | Open Surgery                | NR                                                   | NR                 | NR                                        | 79     |
| Akkoyun (6)         | 2012 | Moderate     | Case control    | Turkey   | Retrospective        | Consecutive     | One site  | 1998-2011 | Children                               | 64.5  | 8.9                | NR       | Perforated                                            | 0          | 100         | 0           | 0           | 100                       | Open Surgery                | 0.6                                                  | General            | NR                                        | 234    |
| Al-Saadi (7)        | 2006 | Moderate     | Cohort          | Yemen    | Retrospective        | Consecutive     | One site  | 2003-2005 | Children, Adolescents, Adults          | 75    | NR                 | NR       | Catarrhal, Perforated, Suppurated, Gangrenous         | NR         | 60          | NR          | 13          | 100                       | Laparoscopy                 | NR                                                   | NR                 | NR                                        | 160    |
| Al-Temimi (8)       | 2017 | Low          | Cohort          | USA      | Prospective          | Systematic      | One site  | 2016      | Children, Adolescents, Adults, Elderly | 40.2  | 30                 | NR       | Catarrhal, Perforated, Suppurated, Gangrenous, Normal | 73         | 17.4        | 3.3         | 3.3         |                           | Laparoscopy                 | 0.6                                                  | NR                 | NR                                        | 92     |
| Ali (9)             | 2012 | Moderate     | Cohort          | Nigeria  | Prospective          | Consecutive     | One site  | 2002-2009 | Children, Adolescents, Adults, Elderly | 33.9  | 32                 | NR       | Catarrhal, Perforated, Suppurated, Gangrenous         | NR         | 23.47       | NR          | NR          |                           | Open Surgery                | NR                                                   | NR                 | NR                                        | 1257   |
| Ali (10)            | 2015 | Moderate     | Cross sectional | Pakistan | Prospective          | Consecutive     | One site  | 2014      | Adults                                 | 46.3  | 27.4               | NR       | Unclear                                               | NR         | NR          | NR          | NR          | 100                       | Open Surgery                | NR                                                   | General            | NR                                        | 121    |
| Almström (11)       | 2016 | Moderate     | Cohort          | Sweden   | Retrospective        | Systematic      | One site  | 2006-2013 | Children, Adolescents                  | 59.5  | NR                 | NR       | Perforated, Non Perforated 76%                        | NR         | 24          | NR          | NR          |                           | Laparoscopy or Open Surgery | 0.8                                                  | NR                 | NR                                        | 2756   |
| Álvarez-Moreno (12) | 2014 | Low          | Cohort          | Colombia | Prospective          | Systematic      | Multisite | 2008-2010 | Children, Adolescents, Adults, Elderly | NR    | NR                 | NR       | Unclear                                               | NR         | NR          | NR          | NR          |                           | NR                          | NR                                                   | NR                 | According to CDC-NNIS diagnostic criteria | 947    |
| Andert (13)         | 2017 | Moderate     | Cohort          | Germany  | Retrospective        | Consecutive     | One site  | 2003-2014 | Adults                                 | 48.6  | 30.5               | NR       | Catarrhal, Perforated, Suppurated, Gangrenous         | NR         | NR          | NR          | NR          | 100                       | Laparoscopy or Open Surgery | NR                                                   | NR                 | Local signs of inflammation               | 2136   |
| Anderson (14)       | 2014 | Moderate     | Cohort          | Sweden   | Retrospective        | Exhaustive      | Multisite | 1992-2008 | Adults                                 | 54    | NR                 | NR       | Perforated, Not perforated                            | NR         | 19.4        | 0           | 0           |                           | Laparoscopy or Open Surgery | NR                                                   | NR                 | NR                                        | 169896 |
| Aranda-Narváez (15) | 2010 | Low          | Cohort          | Spain    | Retrospective        | Random          | One site  | 1997-2009 | Children, Adolescents, Adults, Elderly | 63.3  | 35                 | NR       | Suppurated, Gangrenous                                | 0          | 0           | 53.3        | 46.7        | 100                       | Laparoscopy or Open Surgery | NR                                                   | General            | According to CDC-NNIS diagnostic Criteria | 30     |
| Aranda-Narvaez (16) | 2014 | Moderate     | Cohort          | Spain    | Not reported/Unclear | Not clear       | One site  | 2007-2010 | Adults                                 | 57    | 29                 | NR       | Catarrhal, Perforated, Suppurated, Gangrenous         | 65.8       | NR          | NR          | NR          | 62.00                     | Laparoscopy or Open Surgery | 0.92                                                 | NR                 | According to CDC-NNIS diagnostic Criteria | 868    |

| Author         | Year | Risk of bias | Design          | Country                                             | Timing        | Sampling method | Sites     | Period    | Population                             | %Male | Mean or median age | %Obesity | Pattern of appendicitis                               | %Catarrhal | %Perforated | %Suppurated | %Gangrenous | % with antibiotic therapy | Type of surgery               | Time to complete the surgery intervention (in hours) | Type of anesthesia | SSI Definition                            | Sample |
|----------------|------|--------------|-----------------|-----------------------------------------------------|---------------|-----------------|-----------|-----------|----------------------------------------|-------|--------------------|----------|-------------------------------------------------------|------------|-------------|-------------|-------------|---------------------------|-------------------------------|------------------------------------------------------|--------------------|-------------------------------------------|--------|
| Arthur (17)    | 2017 | Low          | Cross sectional | Australia                                           | Prospective   | Systematic      | Multisite | 2016      | Children, Adolescents, Adults, Elderly | 49.5  | 31.4               | NR       | Unclear                                               | NR         | NR          | NR          | NR          |                           | Laparoscopy or Open Surgery   | 1                                                    | NR                 | NR                                        | 1189   |
| Asefa (18)     | 2002 | High         | Cross sectional | Ethiopia                                            | Retrospective | Consecutive     | One site  | 1997-1999 | Adults                                 | 79.5  | 25.6               | NR       | Catarrhal, Perforated                                 | 45.4       | 44          | 0           | 0           |                           | NR                            | NR                                                   | NR                 | NR                                        | 200    |
| Asefa (19)     | 2014 | Moderate     | Cross sectional | Ethiopia                                            | Retrospective | Consecutive     | One site  | 2006-2010 | Children                               | 62.1  | 10                 | NR       | Catarrhal, Perforated, Suppurated, Gangrenous         | 32.3       | 59.6        | 6.2         | 1.9         |                           | NR                            | NR                                                   | NR                 | NR                                        | 322    |
| Bae (20)       | 2016 | Moderate     | Cross sectional | USA                                                 | Retrospective | Systematic      | One site  | 2010-2013 | Children, Adolescents, Adults          | NR    | 32                 | NR       | Unclear                                               | NR         | NR          | NR          | NR          | 36.4                      | Laparoscopy                   | NR                                                   | NR                 | According to CDC-NNIS diagnostic criteria | 143    |
| Bae (21)       | 2016 | Low          | Cross sectional | Korea                                               | Prospective   | Systematic      | One site  | 2014-2016 | Adults                                 | 52    | 62                 | NR       | Perforated, Suppurated, Gangrenous                    | NR         | 4           | 72          | 24          | 100                       | Laparoscopy                   | 1.2                                                  | General            | According to CDC-NNIS diagnostic criteria | 25     |
| Baek (22)      | 2011 | Moderate     | Cross sectional | Korea                                               | Retrospective | Exhaustive      | One site  | 2007-2009 | Elderly                                | 45.5  | 68.2               | NR       | Catarrhal, Perforated, Suppurated, Gangrenous         | 22.1       | 29.9        | 32.5        | 15.6        | 100                       | Laparoscopy or Open Surgery   | 1.05                                                 | General            | NR                                        | 77     |
| Bali (23)      | 2015 | Moderate     | Cohort          | Turkey                                              | Prospective   | Consecutive     | One site  | 2009-2013 | Adults                                 | 35.7  | 32.33              | NR       | Unclear                                               | NR         | NR          | NR          | NR          |                           | Laparoscopy                   | 1                                                    | NR                 | NR                                        | 126    |
| Banghu (24)    | 2013 | Low          | Cohort          | UK, Spain, Japan, Hong Kong, Australia, New Zealand | Prospective   | Consecutive     | Multisite | 2012      | Children, Adolescents, Adults, Elderly | 51.1  | NR                 | NR       | Unclear                                               | NR         | NR          | NR          | NR          | 96.9                      | Laparoscopy or Open Surgery   | NR                                                   | NR                 | According to CDC-NNIS diagnostic criteria | 3326   |
| Bansal (25)    | 2012 | Low          | Cohort          | Switzerland                                         | Prospective   | Consecutive     | One site  | NR        | Children                               | 62    | 9.8                | NR       | Catarrhal, Perforated                                 | 74.3       | 25.7        | NR          | NR          | 49.2                      | Laparoscopy or Open Surgery   | 1.0                                                  | NR                 | According to CDC-NNIS diagnostic Criteria | 187    |
| Batajoo(26)    | 2012 | Moderate     | Cross sectional | Nepal                                               | Retrospective | Consecutive     | One site  | 2009-2012 | Children, Adolescents, Adults, Elderly | 45.6  | 29.6               | NR       | Unclear                                               | NR         | NR          | NR          | NR          | 100                       | Laparoscopy or Open Surgery   | 0.8                                                  | NR                 | NR                                        | 226    |
| Bharathi (27)  | 2011 | Moderate     | Cohort          | Nepal                                               | Prospective   | Consecutive     | One site  | 2008-2009 | Children, Adolescents, Adults, Elderly | 50    | 22.9               | NR       | Catarrhal, Perforated, Suppurated, Gangrenous         | 80         | NR          | NR          | NR          | 100                       | Laparoscopy with Open Surgery | 0.5                                                  | NR                 | NR                                        | 26     |
| Bıçakcı (28)   | 2011 | High         | Cross sectional | Turkey                                              | Retrospective | Systematic      | Unclear   | 2006-2009 | Children, Adolescents                  | 64.5  | 10                 | NR       | Unclear                                               | NR         | NR          | NR          | NR          |                           | Laparoscopy or Open Surgery   | NR                                                   | NR                 | NR                                        | 279    |
| Bickel (28)    | 2011 | Moderate     | Clinical trial  | Israel                                              | Prospective   | Random          | One site  | 2006-2009 | Adults                                 | 73    | 28                 | NR       | Catarrhal, Gangrenous, Phlegmonous 58.6 , Normal 4.3% | 17         | NR          | NR          | 20.5        | 100                       | Open Surgery                  | 0.5                                                  | General            | NR                                        | 210    |
| Blackwood (29) | 2017 | Moderate     | Cross sectional | USA                                                 | Retrospective | Random          | One site  | 2010-2015 | Children                               | 55.6  | 10.4               | 29.6     | Unclear                                               | NR         | NR          | NR          | NR          |                           | Open Surgery                  | 2                                                    | General            | According to CDC-NNIS diagnostic Criteria | 115    |
| Blakely (31)   | 2011 | Low          | Clinical trial  | USA                                                 | Prospective   | Random          | One site  | 2006-2009 | Children, Adolescents                  | 55.7  | 10.2               | NR       | Perforated                                            | 0          | 100         | 0           | 0           | 100                       | Laparoscopy or Open Surgery   | 1.9                                                  | NR                 | NR                                        | 131    |

| Author                 | Year | Risk of bias | Design          | Country      | Timing        | Sampling method | Sites     | Period    | Population                             | %Male | Mean or median age | %Obesity | Pattern of appendicitis                   | %Catarrhal | %Perforated | %Suppurated | %Gangrenous | % with antibiotic therapy | Type of surgery             | Time to complete the surgery intervention (in hours) | Type of anesthesia | SSI Definition                                                 | Sample |
|------------------------|------|--------------|-----------------|--------------|---------------|-----------------|-----------|-----------|----------------------------------------|-------|--------------------|----------|-------------------------------------------|------------|-------------|-------------|-------------|---------------------------|-----------------------------|------------------------------------------------------|--------------------|----------------------------------------------------------------|--------|
| Bonadio (32)           | 2017 | Moderate     | Cross sectional | USA          | Retrospective | Consecutive     | One site  | 2008-2015 | Children, Adolescents                  | 56.2  | 8.4                | NR       | Perforated                                | 0          | 100         | 0           | 0           | 100                       | Laparoscopy                 | NR                                                   | General            | NR                                                             | 203    |
| Boomer (33)            | 2014 | Low          | Cohort          | USA          | Retrospective | Consecutive     | One site  | 2010-2012 | Children, Adolescents                  | 61.1  | 10.9               | NR       | Catarrhal, Perforated, Gangrenous         | 66.2       | NR          | NR          | NR          | 97.8                      | Laparoscopy or Open Surgery | NR                                                   | General            | Wound infection or abdominal/pelvic abscess                    | 1388   |
| Boomer (34)            | 2016 | Low          | Cross sectional | USA          | Retrospective | Systematic      | Multisite | 2010-2012 | Children, Adolescents                  | 60.3  | 11.0               | NR       | Unclear                                   | NR         | NR          | NR          | NR          |                           | Laparoscopy or Open Surgery | NR                                                   | NR                 | According to CDC-NNIS diagnostic criteria                      | 1338   |
| Bozkurt (35)           | 2014 | Moderate     | Case control    | Turkey       | Retrospective | Consecutive     | One site  | 2008-2012 | Children, Adolescents, Adults, Elderly | 54    | 30.4               | NR       | Catarrhal                                 | 100        | 0           | 0           | 0           |                           | Laparoscopy                 | 0.8                                                  | General            | NR                                                             | 1849   |
| Brandt (36)            | 2008 | Moderate     | Cross sectional | Germany      | Retrospective | Systematic      | Multisite | 2000-2004 | Children, Adolescents, Adults, Elderly | NR    | NR                 | NR       | NR                                        | NR         | NR          | NR          | NR          |                           | NR                          | NR                                                   | NR                 | According to CDC-NNIS diagnostic criteria                      | 10969  |
| Brümmer (37)           | 2009 | Moderate     | Cohort          | Germany      | Retrospective | Consecutive     | Multisite | 2004-2007 | Children, Adolescents, Adults, Elderly | NR    | NR                 | NR       | Unclear                                   | NR         | NR          | NR          | NR          |                           | Laparoscopy or Open Surgery | NR                                                   | NR                 | According to CDC-NNIS diagnostic Criteria                      | 14209  |
| Cairo (38)             | 2017 | Moderate     | Cohort          | USA          | Retrospective | Consecutive     | Multisite | 2012-2015 | Children, Adolescents                  | 61.3  | 11.0               | 29.9     | Unclear                                   | NR         | NR          | NR          | NR          |                           | Laparoscopy or Open Surgery | NR                                                   | General            | NR                                                             | 20981  |
| Cameron (39)           | 2017 | Low          | Cohort          | USA          | Retrospective | Systematic      | Multisite | 2012-2015 | Children, Adolescents                  | 60.4  | 11                 | 11.7     | Unclear                                   | NR         | NR          | NR          | NR          | 100                       | Laparoscopy or Open Surgery | NR                                                   | NR                 | According to CDC-NNIS diagnostic criteria                      | 1389   |
| Cao (40)               | 2015 | Moderate     | Cohort          | China        | Retrospective | Consecutive     | Multisite | 2011-2013 | Adults                                 | 54.2  | 37.3               | 12.4     | Unclear                                   | NR         | NR          | NR          | NR          |                           | Laparoscopy or Open Surgery | 0.8                                                  | General            | NR                                                             | 12586  |
| Cervantes-sánchez (41) | 2000 | Low          | Clinical trial  | Mexico       | Prospective   | Random          | One site  | 1994-1995 | Children, Adults                       | 53.4  | 28                 | NR       | Unclear                                   | NR         | NR          | NR          | NR          |                           | Open Surgery                | NR                                                   | General            | Pus or a positive bacteriologic culture from a wound discharge | 350    |
| Chamisa (42)           | 2009 | High         | Cross sectional | South Africa | Retrospective | Exhaustive      | One site  | 2002-2004 | Children, Adolescents, Adults, Elderly | 78.4  | NR                 | NR       | Catarrhal, Perforated, Gangrenous, Normal | 53         | 30.5        | NR          | 10.2        |                           | Laparoscopy or Open Surgery | NR                                                   | NR                 | NR                                                             | 324    |
| Chaudhary (43)         | 2005 | Moderate     | Clinical trial  | Pakistan     | Prospective   | Random          | One site  | 1999-2003 | Children, Adolescents, Adults, Elderly | 45.4  | NR                 | NR       | Catarrhal                                 | NR         | 0           | 0           | 0           |                           | Open Surgery                | NR                                                   | NR                 | NR                                                             | 677    |
| Chen (44)              | 2011 | High         | Cross sectional | China        | Prospective   | Systematic      | One site  | 2008-2009 | Adults                                 | NR    | NR                 | NR       | Unclear                                   | NR         | NR          | NR          | NR          |                           | Laparoscopy or Open Surgery | 0.8                                                  | Spinal and General | NR                                                             | 69     |
| Chen (45)              | 2012 | High         | Cross sectional | Taiwan       | Prospective   | Consecutive     | One site  | 2010      | Adults                                 | 60    | 38                 | NR       | Unclear                                   | NR         | NR          | NR          | NR          | 73                        | Laparoscopy or Open Surgery | NR                                                   | General            | NR                                                             | 117    |
| Chen (46)              | 2015 | Moderate     | Cohort          | Taiwan       | Retrospective | Consecutive     | One site  | 2010-2012 | Adults                                 | 43.6  | 42.5               | NR       | Catarrhal, Perforated                     | 87.3       | 12.7        | 0           | 0           |                           | Laparoscopy or Open Surgery | NR                                                   | NR                 | NR                                                             | 236    |
| Chiang (47)            | 2006 | Moderate     | Cross sectional | Taiwan       | Retrospective | Exhaustive      | One site  | 2002-2004 | Adults                                 | 59.7  | 35                 | NR       | Catarrhal, Perforated                     | 68         | 17          | 0           | 0           | 100                       | Open Surgery                | 1.1                                                  | General            | NR                                                             | 390    |

| Author         | Year | Risk of bias | Design          | Country | Timing        | Sampling method | Sites     | Period    | Population                             | %Male | Mean or median age | %Obesity | Pattern of appendicitis                       | %Catarrhal | %Perforated | %Suppurated | %Gangrenous | % with antibiotic therapy | Type of surgery             | Time to complete the surgery intervention (in hours) | Type of anesthesia | SSI Definition                                                                                                                                                                                                                                    | Sample |
|----------------|------|--------------|-----------------|---------|---------------|-----------------|-----------|-----------|----------------------------------------|-------|--------------------|----------|-----------------------------------------------|------------|-------------|-------------|-------------|---------------------------|-----------------------------|------------------------------------------------------|--------------------|---------------------------------------------------------------------------------------------------------------------------------------------------------------------------------------------------------------------------------------------------|--------|
| Chiang (48)    | 2012 | Moderate     | Cohort          | Taiwan  | Prospective   | Consecutive     | One site  | 2008-2009 | Adults                                 | 58.6  | 37.8               | 10       | Unclear                                       | NR         | NR          | NR          | NR          | 100                       | Open Surgery                | NR                                                   | General            | Presence of gross or purulent discharge at the incision site with or without a positive bacterial culture                                                                                                                                         | 70     |
| Cho (49)       | 2014 | Low          | Cross sectional | Korea   | Prospective   | Consecutive     | One site  | 2011-2012 | Adults                                 | 53    | 38.7               | 18.8     | Unclear                                       | NR         | NR          | NR          | NR          |                           | Laparoscopy                 | NR                                                   | General            | According to CDC-NNIS diagnostic Criteria                                                                                                                                                                                                         | 101    |
| Choudhary (50) | 2014 | Moderate     | Cross sectional | India   | Prospective   | Random          | One site  | 2010-2013 | Adults                                 | 67    | NR                 | NR       | Appendicular mass                             | 0          | 0           | 0           | 0           |                           | NR                          | NR                                                   | NR                 | NR                                                                                                                                                                                                                                                | 92     |
| Clyde (51)     | 2008 | High         | Cross sectional | USA     | Retrospective | Systematic      | One site  | 2002-2007 | Children, Adolescents, Adults, Elderly | 52    | 35                 | NR       | Catarrhal, Perforated, Unclear                | 77         | 14          | 0           | 0           |                           | Laparoscopy or Open Surgery | NR                                                   | NR                 | NR                                                                                                                                                                                                                                                | 1198   |
| Coakley (52)   | 2011 | Low          | Cohort          | USA     | Retrospective | Exhaustive      | One site  | 2005-2010 | Adults                                 | 47.3  | 28.7               | NR       | Catarrhal, Perforated, Suppurated, Gangrenous | 38.3       | 1.2         | 47.1        | 9.8         | 100                       | Laparoscopy or Open Surgery | 1.0                                                  | NR                 | According to CDC-NNIS diagnostic Criteria                                                                                                                                                                                                         | 728    |
| Crandall (53)  | 2009 | High         | Cross sectional | USA     | Retrospective | Not clear       | One site  | 2004-2005 | Adults                                 | 54    | 32.5               | NR       | NR                                            | NR         | 74          | NR          | NR          |                           | Laparoscopy or Open Surgery | 0.9                                                  | General            | NR                                                                                                                                                                                                                                                | 176    |
| Dede (54)      | 2008 | Moderate     | Cohort          | Hungary | Prospective   | Consecutive     | One site  | 2005-2007 | Children, Adolescents, Adults, Elderly | NR    | NR                 | NR       | Unclear                                       | NR         | NR          | NR          | NR          |                           | Laparoscopy or Open Surgery | NR                                                   | NR                 | NR                                                                                                                                                                                                                                                | 273    |
| Dhiman (55)    | 2013 | High         | Cross sectional | USA     | Retrospective | Not clear       | Multisite | 2003-2009 | Adults                                 | 58    | 30.1               | NR       | Unclear                                       | NR         | NR          | NR          | NR          |                           | Laparoscopy or Open Surgery | NR                                                   | General            | NR                                                                                                                                                                                                                                                | 1250   |
| Dimitriou (56) | 2013 | Moderate     | Cohort          | Germany | Retrospective | Consecutive     | One site  | 2007-2010 | Children, Adolescents, Adults, Elderly | 53.5  | 34.9               | NR       | Unclear                                       | NR         | NR          | NR          | NR          |                           | Laparoscopy or Open Surgery | 1                                                    | NR                 | NR                                                                                                                                                                                                                                                | 404    |
| Durkin (57)    | 2015 | Moderate     | Cohort          | USA     | Retrospective | Consecutive     | Multisite | 2007-2012 | Adults                                 | NR    | NR                 | NR       | Unclear                                       | NR         | NR          | NR          | NR          |                           | Laparoscopy                 | NR                                                   | NR                 | NR                                                                                                                                                                                                                                                | 14763  |
| Ein (58)       | 2013 | Moderate     | Cross sectional | Canada  | Retrospective | Consecutive     | One site  | 1969-2003 | Children                               | 70    | 7                  | NR       | Perforated                                    | 0          | 100         | 0           | 0           | 78.8                      | Open Surgery                | NR                                                   | General            | 1. Wound infection=pus draining from between the stitches or staples<br>2. Intra-abdominal abscess=presence of fever, abdominal pain and or gastrointestinal dysfunction and confirmed by radiologic evidence of intra-abdominal fluid collection | 496    |

| Author         | Year | Risk of bias | Design          | Country      | Timing        | Sampling method | Sites     | Period    | Population                             | %Male | Mean or median age | %Obesity | Pattern of appendicitis                       | %Catarrhal | %Perforated | %Suppurated | %Gangrenous | % with antibiotic therapy | Type of surgery             | Time to complete the surgery intervention (in hours) | Type of anesthesia | SSI Definition                                                                                                                                                                                                                                                    | Sample |
|----------------|------|--------------|-----------------|--------------|---------------|-----------------|-----------|-----------|----------------------------------------|-------|--------------------|----------|-----------------------------------------------|------------|-------------|-------------|-------------|---------------------------|-----------------------------|------------------------------------------------------|--------------------|-------------------------------------------------------------------------------------------------------------------------------------------------------------------------------------------------------------------------------------------------------------------|--------|
| Fukuda (59)    | 2016 | Moderate     | Cohort          | Japan        | Retrospective | Consecutive     | Multisite | 2007-2011 | Children, Adolescents, Adults          | 54.4  | 64.5               | NR       | Unclear                                       | NR         | NR          | NR          | NR          |                           | Laparoscopy or Open Surgery | 1.3                                                  | General            | NR                                                                                                                                                                                                                                                                | 2074   |
| Gandaglia (60) | 2014 | Low          | Cohort          | USA          | Prospective   | Consecutive     | Multisite | 2005-2011 | Adolescents, Adults, Elderly           | NR    | NR                 | NR       | Unclear                                       | NR         | NR          | NR          | NR          | 100                       | Laparoscopy or Open Surgery | NR                                                   | General            | According to CDC-NNIS diagnostic Criteria                                                                                                                                                                                                                         | 97780  |
| Garcell (61)   | 2016 | Low          | Cohort          | Cuba         | Prospective   | Consecutive     | One site  | 2013-2015 | Children, Adolescents, Adults, Elderly | 95.3  | 30.7               | 2.1      | Unclear                                       | NR         | NR          | NR          | NR          |                           | Open Surgery                | NR                                                   | NR                 | According to CDC-NNIS diagnostic Criteria                                                                                                                                                                                                                         | 603    |
| Ghnnam(62)     | 2011 | Moderate     | Cross sectional | Saudi Arabia | Retrospective | Not clear       | One site  | 2007-2010 | Adults                                 | 63.4  | 49.0               | NR       | Perforated, Unclear                           | NR         | 38.1        | NR          | NR          |                           | NR                          | NR                                                   | NR                 | NR                                                                                                                                                                                                                                                                | 63     |
| Giesen(63)     | 2017 | Moderate     | Cohort          | Netherlands  | Retrospective | Consecutive     | Multisite | 2014-2015 | Children, Adults                       | 54.3  | 31                 | NR       | Catarrhal, Perforated, Suppurated, Gangrenous | 48.2       | 17.3        | 23.2        | 11.3        | 100                       | Laparoscopy or Open Surgery | 0.52                                                 | NR                 | According to CDC-NNIS diagnostic criteria                                                                                                                                                                                                                         | 637    |
| Giiti (64)     | 2010 | Moderate     | Cross sectional | Tanzania     | Prospective   | Systematic      | One site  | 2008-2009 | Children, Adolescents, Adults, Elderly | 44.7  | 27                 | NR       | Catarrhal, Perforated, Suppurated, Mass       | 87.4       | 7.0         | 1.5         | 0           |                           | NR                          | NR                                                   | NR                 | NR                                                                                                                                                                                                                                                                | 199    |
| Golub (65)     | 2016 | Moderate     | Cohort          | Russia       | Retrospective | Consecutive     | Multisite | 2012      | Adolescents, Adults                    | NR    | 34.8               | NR       | Unclear                                       | NR         | NR          | NR          | NR          | 100                       | Open Surgery                | NR                                                   | General            | NR                                                                                                                                                                                                                                                                | 332    |
| Gross (66)     | 2016 | Moderate     | Cross sectional | USA          | Retrospective | Consecutive     | Multisite | 2012-2013 | Children, Adolescents                  | 60.1  | NR                 | 17.8     | Perforated                                    | 0          | 100         | 0           | 0           |                           | Laparoscopy or Open Surgery | NT                                                   | General            | NR                                                                                                                                                                                                                                                                | 2585   |
| Gurien (67)    | 2016 | Moderate     | Cohort          | USA          | Retrospective | Consecutive     | One site  | 2009-2012 | Children, Adolescents                  | 62    | 10.5               | NR       | Unclear                                       | NR         | NR          | NR          | NR          | 100                       | Laparoscopy or Open Surgery | NR                                                   | General            | Wound infections or intra abdominal abscesses                                                                                                                                                                                                                     | 484    |
| Hamzaoglu (68) | 2004 | Low          | Cross sectional | Turkey       | Prospective   | Consecutive     | One site  | 1999-2001 | Adults                                 | 57    | 46.7               | NR       | Unclear                                       | NR         | NR          | NR          | NR          |                           | Laparoscopy or Open Surgery | NR                                                   | General            | NR                                                                                                                                                                                                                                                                | 100    |
| Harmon (69)    | 2016 | Low          | Cohort          | USA          | Retrospective | Systematic      | One site  | 2007-2012 | Children, Adolescents, Adults, Elderly | 47.4  | 39.7               | NR       | Non perforated                                | 0          | 0           | 0           | 0           |                           | Laparoscopy or Open Surgery | NR                                                   | NR                 | According to CDC-NNIS diagnostic criteria                                                                                                                                                                                                                         | 411    |
| Helling (70)   | 2017 | Low          | Cross sectional | USA          | Retrospective | Systematic      | One site  | 2009-2014 | Adults                                 | 64.3  | 34.4               | NR       | Unclear                                       | NR         | NR          | NR          | NR          | 100                       | Laparoscopy or Open Surgery | NR                                                   | NR                 | According to CDC-NNIS diagnostic criteria                                                                                                                                                                                                                         | 611    |
| Helmer (71)    | 2002 | Low          | Cross sectional | USA          | Retrospective | Systematic      | One site  | 1998-1999 | Children, Adolescents, Adults, Elderly | NR    | NR                 | NR       | Perforated, Non perforated                    | NR         | 19.4        | NR          | NR          | 100                       | NR                          | NR                                                   | NR                 | A surgical wound infection was defined as purulent drainage from the wound, cellulitis requiring antibiotics, or the opening of a closed wound.<br>An intra-abdominal abscess was defined as an intraabdominal fluid collection that contained purulent material. | 438    |
| Hesami (72)    | 2014 | Low          | Clinical trial  | Iran         | Prospective   | Random          | Unclear   | 2010-2011 | Children, Adolescents, Adults          | 58.9  | 27                 | NR       | Unclear                                       | NR         | NR          | NR          | NR          | 100                       | Open Surgery                | NR                                                   | NR                 | 1..wound unfection=Purulent discharge, redness, inflammation, and the need to reoopen                                                                                                                                                                             | 90     |



| Author          | Year | Risk of bias | Design          | Country        | Timing        | Sampling method | Sites     | Period    | Population                             | %Male | Mean or median age | %Obesity | Pattern of appendicitis                       | %Catarrhal | %Perforated | %Suppurated | %Gangrenous | % with antibiotic therapy | Type of surgery             | Time to complete the surgery intervention (in hours) | Type of anesthesia | SSI Definition                                                                                                                                                                                                                                                                                                   | Sample |
|-----------------|------|--------------|-----------------|----------------|---------------|-----------------|-----------|-----------|----------------------------------------|-------|--------------------|----------|-----------------------------------------------|------------|-------------|-------------|-------------|---------------------------|-----------------------------|------------------------------------------------------|--------------------|------------------------------------------------------------------------------------------------------------------------------------------------------------------------------------------------------------------------------------------------------------------------------------------------------------------|--------|
| Hussain (73)    | 2012 | Moderate     | Clinical trial  | Saudi Arabia   | Prospective   | Consecutive     | One site  | 2010-2011 | Adults                                 | NR    | 32.2               | NR       | Catarrhal                                     | 100        | 0           | 0           | 0           | 100                       | Open Surgery                | NR                                                   | NR                 | the wound<br>2...intra-abdominal abscess=abdominal pain, fullness, fever and confirmed by ecography<br>1..SSI=Pus discharge from wound needing its opening and drainage<br>2..Intra-abdominal collection=fluid collection inside the peritoneal cavity confirmed by ultrasound or CT scan that required drainage | 377    |
| Horvath (74)    | 2016 | Moderate     | Cross sectional | Germany        | Retrospective | Consecutive     | One site  | 2005-2013 | Adults                                 | 47    | 28.6               | NR       | Perforated, phelgmonous                       | NR         | 52          | NR          | NR          |                           | Laparoscopy or Open Surgery | 1.0                                                  | General            | According to CDC-NNIS diagnostic Criteria                                                                                                                                                                                                                                                                        | 1516   |
| Hughes (75)     | 2013 | Moderate     | Cross sectional | United Kingdom | Retrospective | Systematic      | One site  | 2009-2010 | Adults                                 | 55.6  | 30                 | NR       | Unclear, simple and complicated               | NR         | NR          | NR          | NR          | 100                       | Laparoscopy or Open Surgery | NR                                                   | General            | NR                                                                                                                                                                                                                                                                                                               | 266    |
| Hung (76)       | 2016 | Moderate     | Cross sectional | Vietnam        | Prospective   | Systematic      | Multisite | 2008-2010 | Adults                                 | 45    | 41.6               | NR       | Unclear                                       | NR         | NR          | NR          | NR          |                           | Laparoscopy or Open Surgery | 1                                                    | General            | NR                                                                                                                                                                                                                                                                                                               | 752    |
| Iñigo (77)      | 2006 | Low          | Cohort          | Spain          | Prospective   | Consecutive     | One site  | 1998-2002 | Adults                                 | NR    | NR                 | NR       | Unclear                                       | NR         | NR          | NR          | NR          |                           | NR                          | 0.7                                                  | NR                 | According to CDC-NNIS diagnostic Criteria                                                                                                                                                                                                                                                                        | 721    |
| Iqbal (78)      | 2015 | Low          | Clinical trial  | Pakistan       | Prospective   | Random          | One site  | 2011      | Adolescents, Adults, Elderly           | 66.3  | 26                 | NR       | Catarrhal                                     | 100        | 0           | 0           | 0           | 100                       | Open Surgery                | NR                                                   | General            | According to Southampton criteria. Southampton grade 2 and above was considered as surgical site infection.                                                                                                                                                                                                      | 166    |
| Javadi (79)     | 2017 | Moderate     | Clinical trial  | Iran           | Prospective   | Random          | One site  | 2016      | Children, Adolescents, Adults          | 65    | 19.3               | NR       | Catarrhal, Suppurated, Gangrenous             | NR         | 0           | NR          | NR          |                           | Open Surgery                | 0.5                                                  | General            | NR                                                                                                                                                                                                                                                                                                               | 69     |
| Jenkins (80)    | 2016 | Low          | Cohort          | USA            | Prospective   | Systematic      | Multisite | 2006-2011 | Children, Adolescents, Adults, Elderly | 51.3  | 40.1               | NR       | Unclear                                       | NR         | NR          | NR          | NR          |                           | Laparoscopy or Open Surgery | NR                                                   | NR                 | According to CDC-NNIS diagnostic criteria                                                                                                                                                                                                                                                                        | 12410  |
| Kang (81)       | 2012 | Moderate     | Case control    | Korea          | Retrospective | Random          | One site  | 2010-2012 | Adults                                 | 54.4  | 31.7               | NR       | Catarrhal, Perforated, Suppurated, Gangrenous | NR         | 5.1         | NR          | NR          | 100                       | Laparoscopy                 | 1.1                                                  | General            | NR                                                                                                                                                                                                                                                                                                               | 217    |
| Kapischke (82)  | 2013 | Low          | Case control    | Germany        | Retrospective | Consecutive     | One site  | 1999-2001 | Children, Adolescents                  | 47.8  | 11.5               | NR       | Catarrhal, Perforated                         | NR         | NR          | NR          | NR          | 100                       | Laparoscopy or Open Surgery | 0.6                                                  | General            | According to CDC-NNIS diagnostic criteria                                                                                                                                                                                                                                                                        | 159    |
| Karam (83)      | 2016 | Moderate     | Cross sectional | USA            | Retrospective | Not clear       | One site  | 2010-2015 | Children                               | 62    | 12                 | NR       | Perforated, Gangrenous                        | NR         | 20.6        | NR          | 6.2         |                           | Laparoscopy                 | NR                                                   | General            | NR                                                                                                                                                                                                                                                                                                               | 625    |
| Karam (84)      | 2016 | Moderate     | Cross sectional | USA            | Retrospective | Consecutive     | One site  | 2010-2015 | Children, Adolescents                  | 63    | NR                 | NR       | Unclear                                       | NR         | NR          | NR          | NR          | 100                       | Laparoscopy                 | 1                                                    | General            | NR                                                                                                                                                                                                                                                                                                               | 101    |
| Kasatpibal (85) | 2005 | Low          | Cross sectional | Thailand       | Prospective   | Systematic      | Multisite | 2003-2004 | Children, Adolescents, Adults, Elderly | 26.6  | 37.2               | NR       | Unclear                                       | NR         | NR          | NR          | NR          | 24.1                      | NR                          | 0.8                                                  | NR                 | According to CDC-NNIS diagnostic criteria                                                                                                                                                                                                                                                                        | 1487   |
| Kasatpibal (85) | 2006 | Moderate     | Cohort          | Thailand       | Prospective   | Not clear       | Multisite | 2003-2004 | Children, Adolescents, Adults, Elderly | 46.9  | 26                 | NR       | Catarrhal                                     | 100        | NR          | NR          | NR          | 92.2                      | Open Surgery                | 0.97                                                 | NR                 | According to CDC-NNIS diagnostic criteria                                                                                                                                                                                                                                                                        | 2139   |



| Author             | Year | Risk of bias | Design          | Country        | Timing        | Sampling method | Sites     | Period    | Population                             | %Male | Mean or median age | %Obesity | Pattern of appendicitis                         | %Catarrhal | %Perforated | %Suppurated | %Gangrenous | % with antibiotic therapy | Type of surgery               | Time to complete the surgery intervention (in hours) | Type of anesthesia | SSI Definition                                                                                                                                       | Sample |
|--------------------|------|--------------|-----------------|----------------|---------------|-----------------|-----------|-----------|----------------------------------------|-------|--------------------|----------|-------------------------------------------------|------------|-------------|-------------|-------------|---------------------------|-------------------------------|------------------------------------------------------|--------------------|------------------------------------------------------------------------------------------------------------------------------------------------------|--------|
| Kato (87)          | 2008 | Low          | Cohort          | Japan          | Prospective   | Systematic      | One site  | 2004-2006 | Children                               | NR    | 9.4                | NR       | Perforated, Non perforated 75%                  | NR         | 25          | NR          | NR          | 100                       | Open Surgery                  | NR                                                   | NR                 | NR                                                                                                                                                   | 64     |
| Kell (88)          | 2003 | Moderate     | Cohort          | Ireland        | Prospective   | Consecutive     | Unclear   | NR        | Children, Adolescents, Adults, Elderly | 75.2  | 20.7               | NR       | Unclear                                         | NR         | NR          | NR          | NR          | 100                       | Open Surgery                  | NR                                                   | General            | Defined based on clinical and microbiological criteria                                                                                               | 149    |
| Khan (89)          | 2007 | Low          | Cohort          | United Kingdom | Prospective   | Consecutive     | One site  | 2006      | Children, Adolescents, Adults, Elderly | 47.0  | 24                 | NR       | Catarrhal, Perforated                           | 63.4       | 20.1        | 0           | 0           | 100                       | Laparoscopy or Open Surgery   | 0.9                                                  | General            | According to CDC-NNIS diagnostic Criteria                                                                                                            | 134    |
| Khan (90)          | 2012 | Moderate     | Clinical trial  | Pakistan       | Prospective   | Random          | Multisite | 2006-2009 | Adults                                 | 69    | 33.3               | NR       | Unclear                                         | NR         | NR          | NR          | NR          | 100                       | Open Surgery                  | 0.6                                                  | General            | NR                                                                                                                                                   | 100    |
| Khan (91)          | 2014 | Moderate     | Clinical trial  | Pakistan       | Prospective   | Random          | Multisite | 2013-2014 | Children, Adolescents, Adults, Elderly | 56.7  | 24                 | NR       | Unclear                                         | NR         | NR          | NR          | NR          | 100                       | Laparoscopy or Open Surgery   | NR                                                   | NR                 | Observation of pain, redness, tenderness and purulent discharge                                                                                      | 270    |
| Khiria (92)        | 2011 | Moderate     | Cross sectional | India          | Retrospective | Consecutive     | One site  | 1999-2009 | Adults                                 | 66    | 33.4               | NR       | Perforated, Gangrenous                          | NR         | 14.3        | NR          | 5.2         | 100                       | Laparoscopy or Open Surgery   | 1.2                                                  | General            | Any evidence of infection(erythema, purulent discharge, induration...) and requiring suture removal, antibiotic treatment, or evidence of dehiscence | 497    |
| Kilic (93)         | 2016 | Moderate     | Cross sectional | Turkey         | Retrospective | Consecutive     | One site  | 2004-2010 | Children                               | 62.1  | 9.5                | NR       | Perforated                                      | 0          | 100         | 0           | 0           | 100                       | Open Surgery                  | NR                                                   | NR                 | According to CDC-NNIS diagnostic Criteria                                                                                                            | 110    |
| Kim (94)           | 2015 | Low          | Cross sectional | Korea          | Retrospective | Systematic      | One site  | 2008-2013 | Children, Adolescents, Adults, Elderly | 47.8  | 32.6               | NR       | Perforated, Suppurated, Gangrenous, Normal      | 6          | 13.8        | 64.5        | 7.1         | 100                       | Laparoscopy                   | 0.7                                                  | NR                 | According to CDC-NNIS diagnostic criteria                                                                                                            | 2587   |
| Kim (95)           | 2011 | Moderate     | Cross sectional | USA            | Prospective   | Consecutive     | One site  | 2005-2008 | Elderly                                | 48.1  | 73.4               | NR       | Unclear                                         | NR         | NR          | NR          | NR          | 100                       | Laparoscopy or Open Surgery   | NR                                                   | General            | According to CDC-NNIS diagnostic Criteria                                                                                                            | 3335   |
| Kim(96)            | 2016 | Moderate     | Cohort          | Korea          | Retrospective | Consecutive     | One site  | 2005-2012 | Adults                                 | 59    | NR                 | NR       | Perforated, Gangrenous                          | NR         | NR          | NR          | NR          | 100                       | Laparoscopy or Open Surgery   | 1.9                                                  | General            | NR                                                                                                                                                   | 207    |
| Kiriakopoulos (97) | 2006 | Moderate     | Cross sectional | Greece         | Retrospective | Consecutive     | One site  | 2000-2004 | Adults                                 | 73.8  | 42.3               | NR       | Perforated, Suppurated, Generalized peritonitis | 0          | 61.9        | 9.5         | 0           | 100                       | Laparoscopy with Open Surgery | 1.1                                                  | General            | NRR                                                                                                                                                  | 42     |
| Kirshtein (98)     | 2009 | Moderate     | Cross sectional | Israel         | Retrospective | Consecutive     | One site  | 2000-2007 | Adults                                 | 31.9  | 70.1               | NR       | Unclear                                         | NR         | NR          | NR          | NR          | 100                       | Laparoscopy or Open Surgery   | 0.7                                                  | General            | NR                                                                                                                                                   | 1435   |
| Kiudelis (99)      | 2013 | Moderate     | Cross sectional | Lithuania      | Prospective   | Consecutive     | One site  | 2004-2009 | Adults                                 | 46.3  | 32.3               | NR       | Unclear                                         | NR         | NR          | NR          | NR          | 100                       | Laparoscopy                   | 1.1                                                  | General            | NR                                                                                                                                                   | 152    |
| Kleif (100)        | 2017 | Moderate     | Cross sectional | Denmark        | Retrospective | Not clear       | Multisite | 2012-2014 | Adults                                 | 53    | 47                 | NR       | Suppurated, Gangrenous                          | NR         | NR          | NR          | NR          | 98                        | Laparoscopy or Open Surgery   | NR                                                   | General            | NR                                                                                                                                                   | 1151   |
| Koizumi (101)      | 2014 | Moderate     | Cross sectional | Japan          | Prospective   | Consecutive     | One site  | 2010      | Adults                                 | 57.9  | 39.8               | NR       | Catarrhal, Perforated, Gangrenous, phelmong     | 6.4        | 6.4         | NR          | 25 4        | 100                       | Laparoscopy or Open Surgery   | 0.9                                                  | General            | NR                                                                                                                                                   | 185    |
| Kubota (102)       | 2014 | Low          | Clinical trial  | Japan          | Prospective   | Random          | One site  | 2008-2012 | Children                               | 63.6  | NR                 | NR       | Unclear                                         | NR         | NR          | NR          | NR          | 100                       | Open Surgery                  | NR                                                   | General            | According to CDC-NNIS diagnostic Criteria                                                                                                            | 10     |

| Author         | Year | Risk of bias | Design          | Country  | Timing        | Sampling method | Sites     | Period    | Population                             | %Male | Mean or median age | %Obesity | Pattern of appendicitis                               | %Catarrhal | %Perforated | %Suppurated | %Gangrenous | % with antibiotic therapy     | Type of surgery             | Time to complete the surgery intervention (in hours) | Type of anesthesia                        | SSI Definition                                                                                                                                                                                                    | Sample |
|----------------|------|--------------|-----------------|----------|---------------|-----------------|-----------|-----------|----------------------------------------|-------|--------------------|----------|-------------------------------------------------------|------------|-------------|-------------|-------------|-------------------------------|-----------------------------|------------------------------------------------------|-------------------------------------------|-------------------------------------------------------------------------------------------------------------------------------------------------------------------------------------------------------------------|--------|
| Kumamoto (103) | 2014 | Low          | Cohort          | Japan    | Prospective   | Consecutive     | One site  | 1997-2011 | Adults                                 | 0     | 28                 | NR       | Catarrhal, Gangrenous, Phlegmonous                    | 21.8       | NR          | NR          | 33.4        | 100                           | Open Surgery                | 0.7                                                  | General                                   | NR                                                                                                                                                                                                                | 124    |
| Kumar (104)    | 2008 | Moderate     | Cohort          | Pakistan | Prospective   | Consecutive     | One site  | 1997-2000 | Children, Adolescents, Adults, Elderly | NR    | NR                 | NR       | Unclear                                               | NR         | NR          | NR          | NR          | 50                            | Laparoscopy or Open Surgery | 0.7                                                  | NR                                        | NR                                                                                                                                                                                                                | 100    |
| Kumar (105)    | 2016 | Moderate     | Cohort          | Nepal    | Prospective   | Consecutive     | One site  | 2015-2016 | Adolescents, Adults                    | 49    | 33.9               | NR       | Catarrhal, Perforated, Suppurated, Gangrenous, Normal | 88.6       | 4.7         | 1.9         | 2.4         | Laparoscopy or Open Surgery   | 0.7                         | General                                              | According to CDC-NNIS diagnostic Criteria | 212                                                                                                                                                                                                               |        |
| Lacher (106)   | 2012 | Moderate     | Cohort          | USA      | Prospective   | Consecutive     | One site  | 2009-2011 | Children, Adolescents                  | 64.1  | 10.9               | 22.4     | Catarrhal, Perforated                                 | 71.8       | 19          | NR          | NR          | 100                           | Laparoscopy                 | 0.7                                                  | General                                   | NR                                                                                                                                                                                                                | 415    |
| Le (107)       | 2009 | Moderate     | Cross sectional | USA      | Retrospective | Systematic      | One site  | 1997-2007 | Children, Adolescents, Adults, Elderly | 52.1  | 31.8               | NR       | Catarrhal, Perforated, Gangrenous, Normal Appendix    | 92.9       | 2           | 0           | 2.2         | 86                            | Laparoscopy or Open Surgery | 0.9                                                  | NR                                        | According to CDC-NNIS diagnostic criteria                                                                                                                                                                         | 507    |
| Lee (108)      | 2009 | Low          | Clinical trial  | USA      | Prospective   | Random          | One site  | 2006-2008 | Children, Adolescents, Adults, Elderly | 64.2  | 34.2               | NR       | Catarrhal, Perforated, Suppurated, Gangrenous         | 46.8       | 26.6        | 16.5        | 10.1        | 100                           | Open Surgery                | NR                                                   | NR                                        | Any significant subcutaneous SSI necessitating wound opening or treatment with antibiotics. This also included any subject who was prescribed a separate course of antibiotics after discharge from the hospital. | 109    |
| Lee (109)      | 2010 | Moderate     | Cross sectional | Taiwan   | Prospective   | Consecutive     | One site  | 2006-2008 | Children                               | 58    | 11.1               | NR       | Unclear                                               | NR         | NR          | NR          | NR          | Laparoscopy or Open Surgery   | 2                           | General                                              | NR                                        | 264                                                                                                                                                                                                               |        |
| Lee (110)      | 2010 | Moderate     | Cross sectional | Korea    | Retrospective | Consecutive     | One site  | 2008-2009 | Adults                                 | 49.3  | 26.7               | NR       | Perforated, Suppurated                                | 0          | 26.7        | 73.3        | 0           | Laparoscopy                   | 1.0                         | General                                              | NR                                        | 75                                                                                                                                                                                                                |        |
| Lee (111)      | 2011 | Moderate     | Cohort          | USA      | Retrospective | Consecutive     | Multisite | 1998-2007 | Children, Adolescents                  | 61.5  | 11                 | NR       | Perforated, Non perforated                            | NR         | 25.7        | NR          | NR          | Laparoscopy or Open Surgery   | NR                          | General                                              | NR                                        | 2462                                                                                                                                                                                                              |        |
| Lee (112)      | 2011 | Moderate     | Cohort          | USA      | Retrospective | Systematic      | Multisite | 1998-2007 | Children, Adolescents                  | 61    | 11.6               | NR       | Perforated, Non perforated 70.8%                      | NR         | 29.2        | NR          | NR          | Laparoscopy or Open Surgery   | NR                          | NR                                                   | NR                                        | 7650                                                                                                                                                                                                              |        |
| Lemieux (113)  | 2008 | Moderate     | Cohort          | Canada   | Retrospective | Consecutive     | One site  | 1997-2007 | Adults                                 | 0     | 28.8               | NR       | Perforated                                            | NR         | NR          | NR          | NR          | Laparoscopy with Open Surgery | 0.8                         | NR                                                   | NR                                        | 45                                                                                                                                                                                                                |        |
| Levy(114)      | 2013 | Moderate     | Cohort          | USA      | Retrospective | Consecutive     | One site  | 2010-2011 | Children                               | NR    | NR                 | NR       | Catarrhal, Perforated, Suppurated, Gangrenous         | 56.4       | 32.7        | 4.2         | 6.7         | Laparoscopy or Open Surgery   | NR                          | NR                                                   | NSQIP criteria                            | 312                                                                                                                                                                                                               |        |

| Author            | Year | Risk of bias | Design          | Country  | Timing        | Sampling method | Sites     | Period    | Population                             | %Male | Mean or median age | %Obesity | Pattern of appendicitis                                         | %Catarrhal | %Perforated | %Suppurated | %Gangrenous | % with antibiotic therapy | Type of surgery             | Time to complete the surgery intervention (in hours) | Type of anesthesia | SSI Definition                                                                                                                       | Sample |
|-------------------|------|--------------|-----------------|----------|---------------|-----------------|-----------|-----------|----------------------------------------|-------|--------------------|----------|-----------------------------------------------------------------|------------|-------------|-------------|-------------|---------------------------|-----------------------------|------------------------------------------------------|--------------------|--------------------------------------------------------------------------------------------------------------------------------------|--------|
| Li (115)          | 2005 | Moderate     | Cohort          | China    | Prospective   | Consecutive     | One site  | 2002-2004 | Children, Adolescents                  | 71.3  | 7.9                | NR       | Catarrhal, Suppurated, Gangrenous                               | 11.0       | 0           | 69.4        | 19.7        | 100                       | Laparoscopy or Open Surgery | 0.65                                                 | General            | NR                                                                                                                                   | 160    |
| Li (115)          | 2017 | Moderate     | Cohort          | China    | Retrospective | Consecutive     | One site  | 2005-2016 | Children                               | 58.8  | 5.2                | NR       | Unclear                                                         | NR         | NR          | NR          | NR          |                           | Laparoscopy or Open Surgery | 1                                                    | NR                 | Erythema, swelling and pus at the site of operation                                                                                  | 398    |
| Lim (116)         | 2011 | Low          | Cohort          | Korea    | Retrospective | Consecutive     | One site  | 2009-2011 | Adults                                 | 47.8  | 50.8               | NR       | Perforated, Gangrenous                                          | 0          | 61.6        | NR          | 18.3        | 100                       | Laparoscopy or Open Surgery | 1.3                                                  | General            | Any evidence of infection (e.g., erythema, purulent discharge, induration, etc) requiring suture removal, antibiotics or dehiscence. | 60     |
| Lima (117)        | 2007 | Moderate     | Cross sectional | Spain    | Retrospective | Consecutive     | One site  | 2001-2006 | Children, Adolescents, Adults, Elderly | NR    | NR                 | NR       | Catarrhal, Perforated, Suppurated, Gangrenous                   | 53         | 2           | 26.3        | 9.7         |                           | NR                          | NR                                                   | NR                 | NR                                                                                                                                   | 300    |
| Lin (118)         | 2006 | Moderate     | Cross sectional | Taiwan   | Retrospective | Consecutive     | One site  | 2001-2003 | Adults                                 | 57.6  | 37.5               | NR       | Perforated                                                      | NR         | 100         | NR          | NR          | 100                       | Laparoscopy or Open Surgery | 1.4                                                  | Not described      | NR                                                                                                                                   | 229    |
| Litz (119)        | 2016 | Moderate     | Cohort          | USA      | Retrospective | Consecutive     | One site  | 2012-2015 | Children, Adolescents                  | NR    | 11.4               | 17.7     | Catarrhal, Perforated, Suppurated, Gangrenous, Interval, Normal | 54         | 11.4        | 15.0        | 11.9        |                           | Laparoscopy                 | 0.5                                                  | General            | NR                                                                                                                                   | 413    |
| Liu (120)         | 2017 | High         | Cross sectional | China    | Retrospective | Consecutive     | Unclear   | 2015-2016 | Children                               | 53.6  | 6.6                | NR       | Catarrhal, Suppurated, Gangrenous                               | 34.8       | 0           | 38.4        | 26.8        |                           | Laparoscopy or Open Surgery | 1.0                                                  | General            | NR                                                                                                                                   | 112    |
| Mahmood (121)     | 2016 | Moderate     | Clinical trial  | Pakistan | Prospective   | Random          | One site  | 2012      | Children, Adolescents, Adults          | 55.5  | 22.3               | NR       | Unclear                                                         | NR         | NR          | NR          | NR          | 100                       | Laparoscopy or Open Surgery | NR                                                   | General            | Based on Wound Asepsis Score                                                                                                         | 200    |
| Martinez (122)    | 2012 | Moderate     | Cross sectional | Spain    | Retrospective | Random          | One site  | 2011      | Adults                                 | 60    | 35.8               | NR       | Unclear                                                         | NR         | NR          | NR          | NR          |                           | Laparoscopy or Open Surgery | NR                                                   | General            | NR                                                                                                                                   | 75     |
| Mbah (123)        | 2006 | Moderate     | Cohort          | Nigeria  | Prospective   | Consecutive     | One site  | 2005      | Children, Adolescents, Adults, Elderly | 70    | 25                 | NR       | Unclear                                                         | NR         | NR          | NR          | NR          |                           | Open Surgery                | NR                                                   | General            | NR                                                                                                                                   | 136    |
| Memon (124)       | 2017 | Moderate     | Clinical trial  | Pakistan | Prospective   | Random          | One site  | 2014-2016 | Adults                                 | 53.3  | 26                 | NR       | Catarrhal                                                       | 100        | 0           | 0           | 0           | 100                       | Laparoscopy or Open Surgery | NR                                                   | NR                 | NR                                                                                                                                   | 227    |
| Menezes (125)     | 2008 | Moderate     | Cross sectional | Ireland  | Retrospective | Consecutive     | One site  | 2000-2006 | Children, Adolescents                  | 62.7  | 10.5               | NR       | Perforated, Gangrenous                                          | 0          | 81.4        | 0           | 17.8        |                           | Laparoscopy or Open Surgery | NR                                                   | NR                 | NR                                                                                                                                   | 118    |
| Merenda (126)     | 2013 | Moderate     | Cross sectional | Poland   | Retrospective | Consecutive     | One site  | 2006-2012 | Children, Adolescents, Adults, Elderly | NR    | NR                 | NR       | Unclear                                                         | NR         | NR          | NR          | NR          |                           | Laparoscopy or Open Surgery | NR                                                   | NR                 | NR                                                                                                                                   | 317    |
| Michailidou (127) | 2015 | Low          | Cross sectional | USA      | Retrospective | Systematic      | One site  | 2007-2013 | Children, Adolescents                  | 56.1  | 9.6                | NR       | Perforated, Negative appendectomy                               | NR         | 26.5        | NR          | NR          |                           | Laparoscopy or Open Surgery | 1.3                                                  | NR                 | According to CDC-NNIS diagnostic criteria                                                                                            | 264    |
| Michailidou (128) | 2015 | Moderate     | Cross sectional | USA      | Retrospective | Consecutive     | Multisite | 2012      | Children, Adolescents                  | 60.1  | 11.2               | 22.5     | Catarrhal, Perforated, Suppurated, Gangrenous                   | NR         | NR          | NR          | NR          | 100                       | Laparoscopy                 | 0                                                    | General            | NR                                                                                                                                   | 2812   |

| Author            | Year | Risk of bias | Design          | Country        | Timing        | Sampling method | Sites     | Period    | Population                             | %Male | Mean or median age | %Obesity | Pattern of appendicitis                       | %Catarrhal | %Perforated | %Suppurated | %Gangrenous | % with antibiotic therapy | Type of surgery               | Time to complete the surgery intervention (in hours) | Type of anesthesia | SSI Definition                                                     | Sample |
|-------------------|------|--------------|-----------------|----------------|---------------|-----------------|-----------|-----------|----------------------------------------|-------|--------------------|----------|-----------------------------------------------|------------|-------------|-------------|-------------|---------------------------|-------------------------------|------------------------------------------------------|--------------------|--------------------------------------------------------------------|--------|
| Mickovic (129)    | 2015 | Moderate     | Cross sectional | Serbia         | Retrospective | Not clear       | One site  | 2010      | Children                               | 46.4  | 11.7               | NR       | Catarrhal, Perforated, Gangrenous             | 45.9       | 2.2         | NR          | 19.5        | 100                       | Laparoscopy or Open Surgery   | 0.7                                                  | General            | NR                                                                 | 218    |
| Ming (130)        | 2009 | Moderate     | Cross sectional | China          | Retrospective | Consecutive     | One site  | 2003-2005 | Adults                                 | 57.2  | 48.8               | NR       | Perforated, Gangrenous, Appendicular abscess  | NR         | 72.3        | NR          | 38.2        | 100                       | Laparoscopy or Open Surgery   | NR                                                   | General            | NR                                                                 | 173    |
| Mingmalairak(131) | 2009 | Low          | Clinical trial  | Thailand       | Prospective   | Random          | One site  | 2006-2007 | Adults                                 | 61    | 29.5               | 0        | Catarrhal, Perforated, Suppurated, Gangrenous | 24         | 16          | 52          | 8.0         | 100                       | Open Surgery                  | 43                                                   | General            | NR                                                                 | 100    |
| Miyano (132)      | 2010 | Low          | Cohort          | Japan          | Prospective   | Consecutive     | One site  | 2004-2008 | Children, Adolescents                  | 56.5  | 7.7                | NR       | Peritonitis complicating appendicitis         | 0          | 100         | 0           | 0           | 100                       | Laparoscopy or Open Surgery   | 1.9                                                  | General            | NR                                                                 | 23     |
| Moazzez (133)     | 2013 | Low          | Cohort          | USA            | Retrospective | Not clear       | One site  | 2005-2009 | Elderly                                | 49.3  | 74                 | NR       | Unclear                                       | NR         | NR          | NR          | NR          |                           | Laparoscopy or Open Surgery   | NR                                                   | General            | NR                                                                 | 2060   |
| Monge Jodra (134) | 2003 | Moderate     | Cohort          | Spain          | Prospective   | Consecutive     | Multisite | 1997-2000 | Children, Adolescents, Adults, Elderly | NR    | NR                 | NR       | Unclear                                       | NR         | NR          | NR          | NR          |                           | NR                            | NR                                                   | NR                 | According to CDC-NNIS diagnostic Criteria                          | 5780   |
| Mueck (135)       | 2017 | Moderate     | Cohort          | USA            | Prospective   | Consecutive     | One site  | 2012-2015 | Children, Adolescents                  | 62.5  | 11.0               | NR       | Catarrhal, Suppurated                         | NR         | NR          | NR          | NR          | 95                        | Laparoscopy with Open Surgery | NR                                                   | General            | NR                                                                 | 697    |
| Muensterer (136)  | 2011 | Low          | Cohort          | USA            | Prospective   | Consecutive     | One site  | 2009-2010 | Children, Adolescents                  | NR    | 11.2               | NR       | Catarrhal, Perforated                         | 78.1       | 10.4        | 0           | 0           | 100                       | Laparoscopy                   | 0.6                                                  | General            | Infected umbilicus requiring antibiotics, or incision and drainage | 183    |
| Muensterer (137)  | 2009 | Moderate     | Cross sectional | USA            | Prospective   | Consecutive     | One site  | 2009      | Children                               | 61.3  | 11                 | NR       | Perforated                                    | NR         | 21.4        | NR          | NR          |                           | Laparoscopy                   | 0.73                                                 | General            | NR                                                                 | 75     |
| Mustafa (138)     | 2016 | Low          | Clinical trial  | Pakistan       | Prospective   | Random          | One site  | 2015-2016 | Adults                                 | 52.9  | 26.6               | NR       | Perforated                                    | 0          | 100         | 0           | 0           | 100                       | Open Surgery                  | NR                                                   | NR                 | Redness around the wound, serosanguinous discharge, fever > 100°F  | 68     |
| Nadler (139)      | 2003 | High         | Cross sectional | USA            | Retrospective | Systematic      | One site  | 1998-2001 | Children                               | 62.2  | 9.35               | NR       | Perforated                                    | NR         | 100         | NR          | NR          | 100                       | Open Surgery                  | NR                                                   | General            | NR                                                                 | 94     |
| Nataraja (140)    | 2010 | Moderate     | Cohort          | United Kingdom | Retrospective | Consecutive     | One site  | 2008-2010 | Children, Adolescents                  | 59.1  | 11                 | NR       | Catarrhal, Perforated, Suppurated             | NR         | NR          | NR          | NR          |                           | Laparoscopy or Open Surgery   | NR                                                   | General            | NR                                                                 | 191    |
| Nataraja (141)    | 2012 | Moderate     | Case control    | United Kingdom | Retrospective | Consecutive     | Multisite | 2003-2010 | Children, Adolescents                  | 58.2  | 11.3               | NR       | Catarrhal, Perforated, Suppurated, Gangrenous | NR         | NR          | NR          | NR          |                           | Laparoscopy or Open Surgery   | NR                                                   | General            | Post op intra abdominal abscess                                    | 1205   |
| Obayashi (142)    | 2015 | Moderate     | Cross sectional | Japan          | Retrospective | Consecutive     | One site  | 2006-2014 | Children, Adolescents                  | 60    | 11                 | NR       | Unclear                                       | NR         | NR          | NR          | NR          |                           | Laparoscopy or Open Surgery   | NR                                                   | NR                 | NR                                                                 | 485    |
| Obinwa (143)      | 2015 | Moderate     | Cohort          | Ireland        | Retrospective | Consecutive     | One site  | 1995-2008 | Children                               | 54.5  | 9.6                | NR       | Catarrhal, Perforated, Suppurated, Gangrenous | 62.7       | NR          | NR          | 4.2         | 100                       | NR                            | NR                                                   | NR                 | NR                                                                 | 1037   |
| Ohene (144)       | 2006 | Moderate     | Cross sectional | Ghana          | Prospective   | Consecutive     | One site  | 1998-2004 | Adults                                 | 63.9  | 32.4               | NR       | Unclear                                       | NR         | NR          | NR          | NR          | 100                       | Open Surgery                  | NR                                                   | General            | NR                                                                 | 638    |
| Okkyung (145)     | 2002 | Moderate     | Clinical trial  | Korea          | Prospective   | Random          | One site  | 2002      | Children, Adolescents, Adults, Elderly | 54.7  | 30.5               | NR       | Catarrhal, Suppurated, Gangrenous             | NR         | 0           | 50          | 27.3        | 100                       | Open Surgery                  | NR                                                   | General            | NR                                                                 | 84     |

| Author                | Year | Risk of bias | Design          | Country      | Timing        | Sampling method | Sites     | Period    | Population                             | %Male | Mean or median age | %Obesity | Pattern of appendicitis                            | %Catarrhal | %Perforated | %Suppurated | %Gangrenous | % with antibiotic therapy | Type of surgery               | Time to complete the surgery intervention (in hours) | Type of anesthesia | SSI Definition                            | Sample |
|-----------------------|------|--------------|-----------------|--------------|---------------|-----------------|-----------|-----------|----------------------------------------|-------|--------------------|----------|----------------------------------------------------|------------|-------------|-------------|-------------|---------------------------|-------------------------------|------------------------------------------------------|--------------------|-------------------------------------------|--------|
| Onieva (146)          | 2017 | Moderate     | Cross sectional | Spain        | Retrospective | Consecutive     | One site  | 2012-2014 | Children, Adolescents, Adults, Elderly | 53.7  | 32                 | NR       | Unclear                                            | NR         | NR          | NR          | NR          |                           | Laparoscopy or Open Surgery   | NR                                                   | NR                 | NR                                        | 294    |
| Page (147)            | 2010 | Moderate     | Cross sectional | USA          | Retrospective | Exhaustive      | Multisite | 2008      | Adults                                 | 51.4  | 39.2               | NR       | Unclear                                            | NR         | NR          | NR          | NR          |                           | Laparoscopy or Open Surgery   | 0.94                                                 | General            | NR                                        | 17199  |
| Palesty (148)         | 2004 | Moderate     | Cross sectional | USA          | Retrospective | Consecutive     | One site  | 2000-2002 | Adults                                 | 47    | 25.2               | NR       | Unclear                                            | NR         | NR          | NR          | NR          | 100                       | Laparoscopy                   | 1.2                                                  | General            | NR                                        | 50     |
| Pandit (149)          | 2016 | High         | Cohort          | Nepal        | Retrospective | Consecutive     | Multisite | 2009-2014 | Children, Adolescents, Adults          | 51    | 24.3               | NR       | Perforated, Suppurated                             | NR         | 2.6         | 97.4        | 0           |                           | Open Surgery                  | 0.6                                                  | Spinal and General | NR                                        | 101    |
| Parcells (150)        | 2009 | Low          | Cohort          | USA          | Retrospective | Systematic      | One site  | 1997-2007 | Adults                                 | NR    | 39.3               | NR       | Perforated, Not perforated                         | NR         | 33.1        | NR          | NR          |                           | Laparoscopy or Open Surgery   | NR                                                   | NR                 | According to CDC-NNIS diagnostic criteria | 1063   |
| Park (151)            | 2017 | Low          | Cohort          | Korea        | Prospective   | Systematic      | One site  | 2012-2014 | Adults                                 | 53.3  | 37.45              | NR       | Perforated, Gangrenous                             | NR         | 38.7        | NR          | 45.9        |                           | Laparoscopy                   | 1.1                                                  | General            | According to CDC-NNIS diagnostic Criteria | 1343   |
| Park (152)            | 2018 | Moderate     | Cohort          | Korea        | Retrospective | Consecutive     | One site  | 2009-2013 | Adults                                 | 53.7  | 34.2               | NR       | Perforated                                         | NR         | 13.2        | NR          | NR          |                           | Laparoscopy with Open Surgery | 1.1                                                  | General            | NR                                        | 986    |
| Pascual (153)         | 2017 | Moderate     | Cohort          | Spain        | Prospective   | Consecutive     | One site  | 2013-2017 | Adults                                 | 49    | 41                 | NR       | Unclear                                            | NR         | NR          | NR          | NR          |                           | Laparoscopy                   | 0.1                                                  | General            | NR                                        | 100    |
| Patel (154)           | 2003 | High         | Cohort          | Kenya        | Retrospective | Consecutive     | One site  | 1996-2002 | Children, Adolescents, Adults          | 30.2  | 30.6               | NR       | Catarrhal, Suppurated, Gangrenous, Carcinoid tumor | 94.3       | 0           | 0.9         | 2.8         | 100                       | Laparoscopy with Open Surgery | 1.5                                                  | General            | NR                                        | 106    |
| Pearcy (155)          | 2017 | Moderate     | Case control    | USA          | Retrospective | Random          | Multisite | 2010-2014 | Adults                                 | 54    | 36                 | NR       | Unclear                                            | NR         | NR          | NR          | NR          |                           | NR                            | 1.1                                                  | NR                 | NR                                        | 2903   |
| Pishori (156)         | 2003 | Low          | Cross sectional | Pakistan     | Prospective   | Systematic      | One site  | 1997-1999 | Children, Adolescents, Adults, Elderly | NR    | NR                 | NR       | Unclear                                            | NR         | NR          | NR          | NR          |                           | NR                            | NR                                                   | NR                 | According to CDC-NNIS diagnostic criteria | 3304   |
| Putnam (157)          | 2016 | Moderate     | Cross sectional | USA          | Prospective   | Consecutive     | One site  | 2012-2015 | Children, Adolescents                  | 61    | 9.4                | NR       | Perforated, Suppurated, Gangrenous                 | 0          | 100         | 0           | 0           | 100                       | Laparoscopy or Open Surgery   | 0.9                                                  | General            | NR                                        | 410    |
| Qahtani (158)         | 2014 | Moderate     | Cohort          | Saudi Arabia | Prospective   | Random          | One site  | 2012      | Adolescents, Adults                    | 68    | 23.6               | NR       | Catarrhal, Perforated, Gangrenous                  | 9.6        | 19.9        | NR          | 22.4        | 100                       | Open Surgery                  | 1.5                                                  | General            | NR                                        | 91     |
| Quezada(159)          | 2015 | Moderate     | Cohort          | Chile        | Retrospective | Consecutive     | One site  | 2003-2013 | Adults                                 | 43    | 39                 | NR       | Unclear                                            | NR         | NR          | NR          | NR          |                           | Laparoscopy or Open Surgery   | 2.2                                                  | NR                 | NR                                        | 227    |
| Raakow (160)          | 2014 | High         | Cohort          | Germany      | Prospective   | Not clear       | One site  | 2009-2013 | Adolescents, Adults                    | 28.8  | 27.2               | NR       | Catarrhal, Suppurated, Gangrenous                  | 12.8       | 0           | 16          | 4           |                           | Laparoscopy                   | 0.8                                                  | General            | NR                                        | 156    |
| Rafiq (161)           | 2015 | Low          | Clinical trial  | Pakistan     | Prospective   | Random          | One site  | 2012-2014 | Adolescents, Adults, Elderly           | 48.5  | 22.6               | 0        | Unclear                                            | NR         | NR          | NR          | NR          | 100                       | Open Surgery                  | 0.7                                                  | General            | NR                                        | 390    |
| Rajabi-Mashhadi (162) | 2012 | Moderate     | Clinical trial  | Iran         | Prospective   | Random          | One site  | 2006-2007 | Adults                                 | 62.5  | 26.2               | NR       | Unclear, Non perforated                            | NR         | NA          | NR          | NR          | 100                       | Open Surgery                  | NR                                                   | NR                 | NR                                        | 291    |

| Author              | Year | Risk of bias | Design          | Country     | Timing               | Sampling method | Sites     | Period    | Population                             | %Male | Mean or median age | %Obesity | Pattern of appendicitis                       | %Catarrhal | %Perforated | %Suppurated | %Gangrenous | % with antibiotic therapy | Type of surgery               | Time to complete the surgery intervention (in hours) | Type of anesthesia | SSI Definition                                                                                                                                                                                                                                                                                                                                                  | Sample |
|---------------------|------|--------------|-----------------|-------------|----------------------|-----------------|-----------|-----------|----------------------------------------|-------|--------------------|----------|-----------------------------------------------|------------|-------------|-------------|-------------|---------------------------|-------------------------------|------------------------------------------------------|--------------------|-----------------------------------------------------------------------------------------------------------------------------------------------------------------------------------------------------------------------------------------------------------------------------------------------------------------------------------------------------------------|--------|
| Reinisch (163)      | 2017 | Moderate     | Cross sectional | Germany     | Retrospective        | Consecutive     | One site  | 2008-2015 | Adults                                 | 56    | 32                 | NR       | Unclear                                       | NR         | NR          | NR          | NR          | 100                       | Laparoscopy with Open Surgery | NR                                                   | General            | NR                                                                                                                                                                                                                                                                                                                                                              | 680    |
| Rios (164)          | 2004 | High         | Cross sectional | Peru        | Not reported/Unclear | Consecutive     | One site  | 2001-2002 | Children, Adolescents, Adults, Elderly | NR    | 30.6               | NR       | Catarrhal, Perforated, Suppurated, Gangrenous | 15.38      | 16.35       | 44.23       | 24.04       | 100                       | NR                            | 0.98                                                 | Unclear            | NR                                                                                                                                                                                                                                                                                                                                                              | 104    |
| Romano (165)        | 2014 | Moderate     | Cross sectional | USA         | Retrospective        | Systematic      | One site  | 2010-2012 | Adults                                 | 66    | 35.7               | NR       | Gangrenous                                    | NR         | NR          | NR          | 9.7         | 86                        | Laparoscopy                   | NR                                                   | General            | NR                                                                                                                                                                                                                                                                                                                                                              | 372    |
| Romel Hilaire (166) | 2014 | Moderate     | Cross sectional | Cuba        | Retrospective        | Consecutive     | One site  | 2007-2009 | Adults                                 | 100   | NR                 | NR       | Suppurated                                    | 0          | 0           | 100         | 0           |                           | Laparoscopy or Open Surgery   | NR                                                   | NR                 | NR                                                                                                                                                                                                                                                                                                                                                              | 720    |
| Romero (167)        | 2009 | Moderate     | Cross sectional | Colombia    | Retrospective        | Consecutive     | One site  | 1997      | Children, Adolescents, Adults, Elderly | NR    | NR                 | NR       | Unclear                                       | NR         | NR          | NR          | NR          |                           | Laparoscopy                   | NR                                                   | NR                 | NR                                                                                                                                                                                                                                                                                                                                                              | 310    |
| Romy (168)          | 2008 | Low          | Cross sectional | Switzerland | Prospective          | Systematic      | Multisite | 1998-2004 | Children, Adolescents, Adults, Elderly | 53.9  | 32.7               | NR       | Unclear                                       | NR         | NR          | NR          | NR          | 59.5                      | Laparoscopy or Open Surgery   | NR                                                   | NR                 | According to CDC-NNIS diagnostic criteria                                                                                                                                                                                                                                                                                                                       | 2468   |
| Rooh-ul-Muqim (169) | 2010 | Moderate     | Cohort          | Pakistan    | Prospective          | Consecutive     | One site  | 2008-2009 | Adolescents, Adults, Elderly           | 48.5  | 24                 | NR       | Catarrhal, Perforated, Suppurated, Gangrenous | NR         | NR          | NR          | NR          | 100                       | Laparoscopy or Open Surgery   | 0.5                                                  | General            | NR                                                                                                                                                                                                                                                                                                                                                              | 165    |
| Rossem (170)        | 2015 | Moderate     | Cohort          | Netherlands | Prospective          | Consecutive     | Multisite | 2014      | Adults                                 | 47.5  | 44                 | NR       | Perforated, Gangrenous                        | NR         | 68          | 10.4        | 21.7        | 100                       | Laparoscopy with Open Surgery | 0.9                                                  | General            | NR                                                                                                                                                                                                                                                                                                                                                              | 415    |
| Rossem (171)        | 2016 | Low          | Cohort          | Netherlands | Prospective          | Not clear       | Multisite | 2014      | Children, Adolescents, Adults          | 46.2  | 28.0               | NR       | Unclear                                       | NR         | NR          | NR          | NR          |                           | Laparoscopy                   | 0.8                                                  | General            | Superficial surgical site infection: recorded when administration of antibiotics, opening of the incision or both was necessary. An intra-abdominal abscess was defined as a postoperative intra-abdominal fluid collection diagnosed by cross-sectional imaging for which administration of antibiotics or a radiological or surgical intervention was needed. | 1995   |
| Rotermann (172)     | 2004 | Moderate     | Cohort          | Canada      | Retrospective        | Consecutive     | Multisite | 1997-2000 | Children, Adolescents, Adults, Elderly | 55.2  | NR                 | NR       | Unclear                                       | NR         | NR          | NR          | NR          |                           | NR                            | NR                                                   | NR                 | According to CDC-NNIS diagnostic criteria                                                                                                                                                                                                                                                                                                                       | 80867  |



| Author                | Year | Risk of bias | Design          | Country     | Timing        | Sampling method | Sites     | Period    | Population                             | %Male | Mean or median age | %Obesity | Pattern of appendicitis                       | %Catarrhal | %Perforated | %Suppurated | %Gangrenous | % with antibiotic therapy | Type of surgery             | Time to complete the surgery intervention (in hours) | Type of anesthesia | SSI Definition                                                                                                                                                                                                                                                                                                                                | Sample |
|-----------------------|------|--------------|-----------------|-------------|---------------|-----------------|-----------|-----------|----------------------------------------|-------|--------------------|----------|-----------------------------------------------|------------|-------------|-------------|-------------|---------------------------|-----------------------------|------------------------------------------------------|--------------------|-----------------------------------------------------------------------------------------------------------------------------------------------------------------------------------------------------------------------------------------------------------------------------------------------------------------------------------------------|--------|
| Saar (173)            | 2016 | Low          | Cross sectional | Estonia     | Prospective   | Consecutive     | One site  | 2013-2014 | Adults                                 | 48.9  | 35.4               | NR       | Perforated, Gangrenous                        | NR         | 15.4        | NR          | 59.4        | 95.1                      | Laparoscopy or Open Surgery | 0.7                                                  | General            | According to CDC-NNIS diagnostic Criteria                                                                                                                                                                                                                                                                                                     | 266    |
| Saber (174)           | 2010 | Moderate     | Clinical trial  | USA         | Prospective   | Consecutive     | One site  | 2008-2009 | Adults                                 | 42.3  | 33                 | NR       | Catarrhal                                     | 100        | 0           | 0           | 0           |                           | Laparoscopy                 | 0.8                                                  | NR                 | NR                                                                                                                                                                                                                                                                                                                                            | 26     |
| Sadraei-Mosavi (175)  | 2017 | Moderate     | Clinical trial  | Iran        | Prospective   | Random          | One site  | 2013-2014 | Adults                                 | NR    | 28.4               | NR       | Catarrhal                                     | 100        | 0           | 0           | 0           | 100                       | Open Surgery                | NR                                                   | NR                 | SSI=pus discharge from wound, redness, tenderness, edema                                                                                                                                                                                                                                                                                      | 152    |
| Saha (176)            | 2010 | Moderate     | Cohort          | Bangladesh  | Prospective   | Consecutive     | One site  | 2007-2008 | Children                               | NR    | NR                 | NR       | Unclear                                       | NR         | NR          | NR          | NR          | 100                       | Laparoscopy or Open Surgery | NR                                                   | NR                 | NR                                                                                                                                                                                                                                                                                                                                            | 60     |
| Sahm (177)            | 2010 | Moderate     | Cross sectional | Germany     | Prospective   | Systematic      | One site  | 1998-2006 | Adults                                 | 54    | 39                 | NR       | Catarrhal, Perforated, Gangrenous             | 50.7       | 17.0        | NR          | 6.9         | 100                       | Laparoscopy or Open Surgery | 1.0                                                  | General            | NR                                                                                                                                                                                                                                                                                                                                            | 1710   |
| Sahm (178)            | 2015 | Moderate     | Cross sectional | Germany     | Prospective   | Exhaustive      | Multisite | 1988-2009 | Children, Adolescents, Adults, Elderly | 43    | 31                 | NR       | Perforated, Non Perforated                    | 91.5       | NR          | 8.5         | NR          | NR                        | Laparoscopy or Open Surgery | NR                                                   | NR                 | NR                                                                                                                                                                                                                                                                                                                                            | 12570  |
| Saló (179)            | 2016 | High         | Cohort          | Sweden      | Retrospective | Consecutive     | One site  | 2006-2014 | Children                               | 55.6  | 10.4               | NR       | Perforated, Gangrenous, Phlegmonous           | NR         | 7.3         | NR          | 11.6        | 100                       | Laparoscopy                 | 0.94                                                 | NR                 | NR                                                                                                                                                                                                                                                                                                                                            | 259    |
| Sanchez-Santana (180) | 2017 | Low          | Cohort          | Spain       | Prospective   | Consecutive     | One site  | 2007-2015 | Adults                                 | 55.2  | 32.9               | 2.6      | Unclear                                       | NR         | NR          | NR          | NR          | 71.3                      | Laparoscopy or Open Surgery | NR                                                   | NR                 | According to CDC-NNIS diagnostic criteria                                                                                                                                                                                                                                                                                                     | 930    |
| Sauvain (181)         | 2016 | Moderate     | Cohort          | Switzerland | Retrospective | Consecutive     | Multisite | 2007-2011 | Adults                                 | 53.2  | 34                 | NR       | Catarrhal, Perforated, Suppurated, Gangrenous | NR         | 19          | NR          | NR          |                           | Laparoscopy or Open Surgery | NR                                                   | NR                 | NR                                                                                                                                                                                                                                                                                                                                            | 2559   |
| Scarborough (182)     | 2012 | Low          | Cross sectional | USA         | Retrospective | Systematic      | Multisite | 2005-2009 | Children, Adolescents, Adults, Elderly | 52    | 38.9               | NR       | Perforated, Non rupture                       | NR         | 11.2        | NR          | NR          |                           | Laparoscopy or Open Surgery | 0.9                                                  | NR                 | According to CDC-NNIS diagnostic criteria                                                                                                                                                                                                                                                                                                     | 39122  |
| Scarless (182)        | 2013 | Moderate     | Clinical trial  | Scotland    | Prospective   | Random          | One site  | 2011      | Adults                                 | 53    | 32                 | NR       | Unclear                                       | NR         | NR          | NR          | NR          |                           | Laparoscopy                 | 1.4                                                  | General            | NR                                                                                                                                                                                                                                                                                                                                            | 38     |
| Seifarth (183)        | 2016 | Moderate     | Cohort          | USA         | Retrospective | Consecutive     | Multisite | 2007-2012 | Children, Adults                       | 60    | 12                 | NR       | Catarrhal                                     | 100        | 0           | 0           | 0           |                           | Laparoscopy                 | NR                                                   | General            | NR                                                                                                                                                                                                                                                                                                                                            | 1283   |
| Seifarth (184)        | 2016 | Low          | Cohort          | USA         | Retrospective | Consecutive     | Multisite | 2007-2012 | Children, Adolescents, Adults          | 60    | 12                 | NR       | Perforated, Suppurated, Gangrenous            | 100        | 0           | 0           | 0           |                           | Laparoscopy                 | NR                                                   | NR                 | NR                                                                                                                                                                                                                                                                                                                                            | 1283   |
| Senekjan (185)        | 2013 | Moderate     | Cohort          | USA         | Retrospective | Consecutive     | Multisite | 2005-2009 | Adolescents                            | 56.5  | 40.3               | NR       | Unclear                                       | NR         | NR          | NR          | NR          |                           | Laparoscopy or Open Surgery | 0.9                                                  | NR                 | 1) SSI (superficial and deep incisional)...infection within 30 days of operation and involved skin, subcutaneous tissue or deep soft tissue<br>2) Organ space infection (OSI)...infection within 30 days of operation when the infection appeared to be related to the operation and involved any part of the anatomy other than the incision | 61830  |



| Author                | Year | Risk of bias | Design          | Country     | Timing        | Sampling method | Sites     | Period    | Population                             | %Male | Mean or median age | %Obesity | Pattern of appendicitis                                      | %Catarrhal | %Perforated | %Suppurated | %Gangrenous | % with antibiotic therapy | Type of surgery               | Time to complete the surgery intervention (in hours) | Type of anesthesia | SSI Definition                            | Sample |
|-----------------------|------|--------------|-----------------|-------------|---------------|-----------------|-----------|-----------|----------------------------------------|-------|--------------------|----------|--------------------------------------------------------------|------------|-------------|-------------|-------------|---------------------------|-------------------------------|------------------------------------------------------|--------------------|-------------------------------------------|--------|
| Seo (186)             | 2002 | Moderate     | Cross sectional | Korea       | Retrospective | Systematic      | One site  | 2000      | Adults                                 | 0     | NR                 | NR       | Catarrhal, Perforated, Suppurated, Gangrenous                | 14.7       | 15.6        | 49.5        | 20.2        |                           | NR                            | NR                                                   | NR                 | NR                                        | 129    |
| Sesia (187)           | 2011 | Moderate     | Cohort          | Germany     | Prospective   | Consecutive     | One site  | 2006-2008 | Children, Adolescents, Adults, Elderly | NR    | NR                 | NR       | Unclear                                                      | NR         | NR          | NR          | NR          | 100                       | Laparoscopy or Open Surgery   | 1                                                    | NR                 | NR                                        | 265    |
| Shaikh (188)          | 2011 | Moderate     | Cross sectional | Pakistan    | Prospective   | Consecutive     | One site  | 2007-2009 | Adults                                 | 51.4  | 29                 | NR       | Catarrhal, Perforated, Suppurated                            | 82.86      | 8.67        | 1.51        | 0           |                           | Open Surgery                  | NR                                                   | General            | NR                                        | 461    |
| Shang (189)           | 2017 | Moderate     | Cohort          | China       | Retrospective | Consecutive     | One site  | 2013-2016 | Adults                                 | 54.3  | 2.2                | NR       | Unclear                                                      | NR         | NR          | NR          | NR          |                           | Laparoscopy or Open Surgery   | NR                                                   | NR                 | Erythema, swelling and purulent discharge | 398    |
| Shimizu (102)         | 2014 | Low          | Cross sectional | Japan       | Retrospective | Not clear       | One site  | 2000-2012 | Adults                                 | 44    | 35                 | NR       | Catarrhal, Gangrenous                                        | 19         | NR          | NR          | 37          |                           | Open Surgery                  | NR                                                   | General            | According to CDC-NNIS diagnostic Criteria | 300    |
| Shindholimath (190)   | 2011 | Moderate     | Cross sectional | India       | Retrospective | Consecutive     | One site  | 2007-2009 | Adults                                 | 68.4  | NR                 | NR       | Perforated, Suppurated, Gangrenous, Appendicular abscess     | 0          | 36.8        | 5.3         | 26.3        | 100                       | Laparoscopy                   | 1.6                                                  | General            | NR                                        | 19     |
| Siam (191)            | 2017 | Moderate     | Cohort          | Israel      | Retrospective | Consecutive     | One site  | 2008-2015 | Adults                                 | 62.8  | 34.1               | NR       | Unclear                                                      | NR         | NR          | NR          | NR          | 100                       | Laparoscopy with Open Surgery | 0.7                                                  | General            | NR                                        | 1649   |
| Silva (192)           | 2008 | Moderate     | Cohort          | Chile       | Prospective   | Random          | One site  | 2005-2006 | Adults                                 | 58.9  | NR                 | NR       | Unclear                                                      | NR         | NR          | NR          | NR          |                           | Open Surgery                  | NR                                                   | General            | NR                                        | 433    |
| Singh (193)           | 2017 | Moderate     | Clinical trial  | India       | Prospective   | Consecutive     | One site  | 2014-2015 | Adults                                 | 43.2  | 28.7               | 11.4     | Unclear                                                      | NR         | NR          | NR          | NR          |                           | Laparoscopy or Open Surgery   | NR                                                   | General            | NR                                        | 44     |
| Siribumrungwong (194) | 2013 | Low          | Cohort          | Thailand    | Retrospective | Systematic      | One site  | 2006      | Adults                                 | 65    | 37                 | NR       | Perforated                                                   | NR         | 100         | NR          | NR          | 100                       | Open Surgery                  | 1.2                                                  | NR                 | According to CDC-NNIS diagnostic criteria | 128    |
| Sivrikoz (195)        | 2015 | Moderate     | Cohort          | USA         | Retrospective | Exhaustive      | Multisite | 2004-2010 | Children, Adolescents, Adults, Elderly | 52.1  | 48                 | NR       | Unclear                                                      | NR         | NR          | NR          | NR          |                           | Laparoscopy or Open Surgery   | 0.9                                                  | NR                 | NR                                        | 4844   |
| Soll (196)            | 2016 | Low          | Cohort          | Switzerland | Retrospective | Consecutive     | One site  | 2009-2013 | Children, Adolescents, Adults, Elderly | 54.7  | 26.5               | NR       | Catarrhal, Perforated, Suppurated, Gangrenous                | NR         | 46          | NR          | NR          | 100                       | Laparoscopy                   | 1                                                    | NR                 | According to CDC-NNIS diagnostic Criteria | 813    |
| Sozutek (197)         | 2013 | Low          | Clinical trial  | Turkey      | Retrospective | Consecutive     | One site  | 2010-2011 | Adults                                 | 44    | 30.9               | NR       | Catarrhal, Perforated                                        | 57         | 20          | NR          | NR          |                           | Laparoscopy or Open Surgery   | 0.5                                                  | General            | NR                                        | 75     |
| Srishewachart (198)   | 2016 | Moderate     | Cross sectional | Thailand    | Retrospective | Consecutive     | One site  | 2012-2014 | Children, Adolescents, Adults, Elderly | 52    | 43.7               | 7.4      | Unclear                                                      | NR         | NR          | NR          | NR          |                           | Open Surgery                  | NR                                                   | General            | NR                                        | 450    |
| Staszewicz (199)      | 2014 | Moderate     | Cohort          | Switzerland | Prospective   | Systematic      | Multisite | 1998-2011 | Children, Adolescents, Adults, Elderly | 54    | 34.2               | NR       | Unclear                                                      | NR         | NR          | NR          | NR          |                           | Laparoscopy or Open Surgery   | 1                                                    | NR                 | According to CDC-NNIS diagnostic Criteria | 6383   |
| Suttie (200)          | 2004 | High         | Case control    | Scotland    | Retrospective | Not clear       | One site  | 1997-2002 | Children                               | 50    | 10.8               | NR       | Perforated, Suppurated, Gangrenous                           | 0          | 2           | 50          | 14          |                           | Laparoscopy                   | 1                                                    | General            | NR                                        | 60     |
| Svensson (201)        | 2016 | Moderate     | Cohort          | Sweden      | Prospective   | Consecutive     | One site  | 2006-2010 | Children, Adolescents                  | 60.2  | 11.3               | NR       | Catarrhal, Perforated, Suppurated, Gangrenous, not described | 6.6        | 21.8        | 44.6        | 29.8        | 100                       | Laparoscopy or Open Surgery   | 0.7                                                  | General            | NR                                        | 1745   |

| Author           | Year | Risk of bias | Design          | Country     | Timing        | Sampling method | Sites     | Period    | Population                             | %Male | Mean or median age | %Obesity | Pattern of appendicitis                           | %Catarhal | %Perforated | %Suppurated | %Gangrenous | % with antibiotic therapy | Type of surgery               | Time to complete the surgery intervention (in hours) | Type of anesthesia | SSI Definition                            | Sample |
|------------------|------|--------------|-----------------|-------------|---------------|-----------------|-----------|-----------|----------------------------------------|-------|--------------------|----------|---------------------------------------------------|-----------|-------------|-------------|-------------|---------------------------|-------------------------------|------------------------------------------------------|--------------------|-------------------------------------------|--------|
| Taguchi (202)    | 2015 | Moderate     | Clinical trial  | Japan       | Prospective   | Random          | One site  | 2009-2014 | Adults                                 | 65.43 | 47.5               | NR       | Unclear                                           | NR        | NR          | NR          | NR          |                           | Laparoscopy or Open Surgery   | 1.2                                                  | General            | According to CDC-NNIS diagnostic Criteria | 81     |
| Tanaka (203)     | 2007 | Moderate     | Cohort          | Japan       | Retrospective | Consecutive     | One site  | 2002-2005 | Children                               | 54.3  | 2.2                | NR       | Unclear                                           | NR        | NR          | NR          | NR          |                           | Laparoscopy or Open Surgery   | NR                                                   | NR                 | NR                                        | 95     |
| Tijerina (204)   | 2010 | Low          | Clinical trial  | Mexico      | Prospective   | Exhaustive      | One site  | 2005-2007 | Children, Adolescents, Adults, Elderly | 46    | NR                 | NR       | Unclear                                           | NR        | NR          | NR          | NR          | 100                       | Open Surgery                  | NR                                                   | General            | NR                                        | 529    |
| Toro Pablo (205) | 2017 | Moderate     | Cohort          | Spain       | Retrospective | Consecutive     | One site  | 2012-2016 | Children, Adolescents, Adults          | NR    | 26                 | NR       | Unclear                                           | NR        | NR          | NR          | NR          |                           | Laparoscopy or Open Surgery   | NR                                                   | NR                 | NR                                        | 600    |
| Towfigh (206)    | 2011 | Low          | Clinical trial  | USA         | Prospective   | Random          | One site  | 2007-2009 | Adults                                 | 77.3  | 33                 | NR       | Perforated                                        | 0         | 100         | 0           | 0           |                           | Open Surgery                  | NR                                                   | NR                 | NR                                        | 75     |
| Troillet (207)   | 2017 | Low          | Cohort          | Switzerland | Prospective   | Consecutive     | Multisite | 2011-2015 | Children, Adolescents, Adults, Elderly | NR    | NR                 | NR       | Unclear                                           | NR        | NR          | NR          | NR          | 92.2                      | Laparoscopy or Open Surgery   | NR                                                   | NR                 | According to CDC-NNIS diagnostic Criteria | 15439  |
| Tsioplis (208)   | 2013 | Moderate     | Cross sectional | Germany     | Retrospective | Consecutive     | One site  | 1999-2008 | Children, Adolescents, Adults, Elderly | 51    | 23                 | 9        | Catarhal, Perforated, Suppurated, Gangrenous      | 19        | NR          | 50          | 25          | 75                        | Laparoscopy or Open Surgery   | NR                                                   | Not reported       | NR                                        | 1439   |
| Vahdad (209)     | 2016 | Moderate     | Cross sectional | Germany     | Retrospective | Systematic      | One site  | 2008-2012 | Children, Adolescents                  | 52.4  | NR                 | NR       | Catarhal, Perforated, Phelgmonous in 43% of cases | 48.2      | 8.7         | NR          | NR          |                           | Laparoscopy                   | 1.1                                                  | NR                 | NR                                        | 309    |
| Van Rossem (210) | 2016 | High         | Cohort          | Netherlands | Prospective   | Consecutive     | Multisite | 2014      | Adults                                 | 49.7  | 39.0               | NR       | Catarhal, Perforated, Gangrenous                  | 73.7      | 11.0        | NR          | 9.9         | 96.6                      | Laparoscopy or Open Surgery   | 0.72                                                 | NR                 | NR                                        | 1378   |
| Van Rossem (170) | 2014 | High         | Cohort          | Netherlands | Retrospective | Consecutive     | Multisite | 2004-2010 | Adults                                 | 53.2  | 49                 | NR       | Perforated                                        | 0         | 100         | 0           | 0           | 100                       | Laparoscopy or Open Surgery   | 0.85                                                 | NR                 | NR                                        | 267    |
| Wang-Chan (211)  | 2017 | Low          | Cross sectional | Switzerland | Retrospective | Consecutive     | One site  | 2013-2014 | Children, Adolescents, Adults, Elderly | 55.3  | 47                 | 13.8     | Unclear                                           | NR        | NR          | NR          | NR          |                           | Laparoscopy with Open Surgery | NR                                                   | General            | According to CDC-NNIS diagnostic Criteria | 246    |
| Watanabe (212)   | 2011 | Low          | Cross sectional | Japan       | Prospective   | Consecutive     | Multisite | 2005-2006 | Adults                                 | 59.4  | 63.8               | NR       | Unclear                                           | NR        | NR          | NR          | NR          |                           | Laparoscopy or Open Surgery   | NR                                                   | General            | According to CDC-NNIS diagnostic Criteria | 903    |
| Willis (213)     | 2016 | Moderate     | Cohort          | USA         | Prospective   | Consecutive     | One site  | 2013-2014 | Children, Adolescents                  | 58.5  | 8.8                | NR       | Unclear                                           | NR        | NR          | NR          | NR          | 100                       | Laparoscopy or Open Surgery   | NR                                                   | General            | NR                                        | 313    |
| Wong (214)       | 2015 | High         | Cohort          | Peru        | Prospective   | Not clear       | Multisite | 2005-2010 | Adults                                 | NR    | NR                 | NR       | Unclear                                           | NR        | NR          | NR          | NR          |                           | Laparoscopy or Open Surgery   | NR                                                   | General            | NR                                        | 352    |
| Wu (215)         | 2006 | Low          | Cross sectional | Taiwan      | Retrospective | Not clear       | One site  | 2001-2005 | Adults                                 | 75    | 42                 | NR       | Unclear                                           | NR        | NR          | NR          | NR          |                           | Laparoscopy or Open Surgery   | 0.95                                                 | General            | NR                                        | 1795   |

| Author           | Year | Risk of bias | Design          | Country | Timing        | Sampling method | Sites     | Period    | Population                             | %Male | Mean or median age | %Obesity | Pattern of appendicitis            | %Catarrhal | %Perforated | %Suppurated | %Gangrenous | % with antibiotic therapy | Type of surgery             | Time to complete the surgery intervention (in hours) | Type of anesthesia | SSI Definition | Sample |
|------------------|------|--------------|-----------------|---------|---------------|-----------------|-----------|-----------|----------------------------------------|-------|--------------------|----------|------------------------------------|------------|-------------|-------------|-------------|---------------------------|-----------------------------|------------------------------------------------------|--------------------|----------------|--------|
| Wu (216)         | 2011 | Moderate     | Cohort          | Taiwan  | Retrospective | Exhaustive      | Multisite | 2004-2009 | Children, Adolescents, Adults, Elderly | 58.1  | 36.4               | NR       | Unclear                            | NR         | NR          | NR          | NR          |                           | Laparoscopy or Open Surgery | NR                                                   | General            | NR             | 1366   |
| Wu (217)         | 2014 | Moderate     | Clinical trial  | China   | Prospective   | Random          | One site  | 2011-2013 | Children, Adolescents                  | 60    | 8.5                | NR       | Catarrhal                          | 100        | 0           | 0           | 0           |                           | Laparoscopy                 | 1                                                    | General            | NR             | 60     |
| Wu (218)         | 2017 | Moderate     | Cross sectional | China   | Retrospective | Consecutive     | One site  | 2014-2016 | Elderly                                | 59    | 71                 | NR       | Perforated, Suppurated, Gangrenous | 0          | 61.7        | 10          | 28.7        | 100                       | Laparoscopy or Open Surgery | 1                                                    | General            | NR             | 115    |
| Yaghoubian (219) | 2010 | High         | Cross sectional | USA     | Retrospective | Exhaustive      | Multisite | 1998-2007 | Children, Adolescents, Adults, Elderly | 61.5  | 29.2               | NR       | Catarrhal, Perforated              | 73.4       | 26.6        | 0           | 0           |                           | Laparoscopy or Open Surgery | NR                                                   | NR                 | NR             | 4325   |
| Yagnik (220)     | 2010 | Moderate     | Cross sectional | India   | Retrospective | Consecutive     | One site  | 2007-2009 | Children, Adolescents, Adults          | 32.5  | 23.41              | NR       | Catarrhal                          | 100        | 0           | 0           | 0           | 100                       | Laparoscopy or Open Surgery | 1                                                    | General            | NR             | 151    |
| Yousef (221)     | 2017 | Moderate     | Cohort          | Canada  | Prospective   | Consecutive     | One site  | 2015-2016 | Children, Adolescents                  | 63.1  | 9.3                | NR       | Perforated                         | 0          | 100         | 0           | 0           | 100                       | Laparoscopy                 | NR                                                   | General            | NR             | 122    |
| Zhang (222)      | 2015 | Moderate     | Clinical trial  | China   | Prospective   | Random          | One site  | 2012-2013 | Adults                                 | 47.2  | 30.8               | NR       | Unclear                            | 10.2       | 7.4         | 54.6        | 9.3         |                           | Laparoscopy                 | 0.9                                                  | General            | NR             | 108    |

NR: not reported

## References

## References

1. Adejumo A.A., N.M., Mshelia, Y.M., Saleh. Clinicopathological presentation and management outcome of appendicitis in gombe, north-east nigeria: a 7-year retrospective audit. Niger J Med. 2015;24(4):337-43.
2. Aguiló J., S., Peiró, C., Muñoz, J., García del Caño, M., Garay, V., Viciano, et al. Adverse outcomes in the surgical treatment of acute appendicitis. Efectos adversos en la cirugía de la apendicitis aguda. 2005;78(5):312-7.
3. Adhikary S., S., Tyagi, G., Sapkota, A., Afaq, B.K., Bhattarai, C.S., Agrawal. Port exteriorization appendectomy: is it the future? Nepal Med Coll J. 2008;10(1):30-4.
4. Ahmad M., K., Ali, H., Latif, S., Naz, K., Said. Comparison of primary wound closure with delayed primary closure in perforated appendicitis. J Ayub Med Coll Abbottabad. 2014;26(2):153-7.
5. Ahmed I., J., Burr, M., Castillo, D., Collins, J.A., Cook, M., Campbell, et al. Single port/incision laparoscopic surgery compared with standard three-port laparoscopic surgery for appendectomy: A randomized controlled trial. Surg Endosc Interv Tech.

- 1  
2  
3 2015;29(1):77-85.  
4  
5  
6  
7 6. Akkoyun I., A., Taş Tuna. Advantages of abandoning abdominal cavity irrigation and  
8 drainage in operations performed on children with perforated appendicitis. *J Pediatr Surg.*  
9 2012;47(10):1886-90.  
10  
11  
12  
13  
14 7. Al-Saadi A.S., A.H., Al-Wadan, S.A., Hamarnah, H., Amin. Is abandoning routine  
15 peritoneal cultures during appendectomy justified? *Saudi Med J.* 2007;28(12):1827-9.  
16  
17  
18  
19  
20 8. Al-Temimi M.H., M.A., Berglin, E.G., Kim, D.J., Tessier, S.D., Johna. Endostapler versus  
21 Hem-O-Lok clip to secure the appendiceal stump and mesoappendix during laparoscopic  
22 appendectomy. *Am J Surg.* 2017;214(6):1143-8.  
23  
24  
25  
26  
27 9. Ali N., S., Aliyu. Appendicitis and its surgical management experience at the University of  
28 Maiduguri Teaching Hospital Nigeria. *Niger J Med.* 2012;21(2):223-6.  
29  
30  
31  
32  
33  
34 10. Ali K., H., Latif, S., Ahmad. Frequency of wound infection in non-perforated appendicitis  
35 with use of single dose preoperative antibiotics. *J Ayub Med Coll Abbottabad.*  
36 2015;27(2):378-80.  
37  
38  
39  
40  
41 11. Almström M., J.F., Svensson, B., Patkova, A., Svenningsson, T., Wester. In-hospital  
42 surgical delay does not increase the risk for perforated appendicitis in children. *Ann Surg.*  
43 2017;265(3):616-21.  
44  
45  
46  
47  
48 12. Álvarez-Moreno C., A.M., Pérez-Fernández, V.D., Rosenthal, J., Quintero, E., Chapeta-  
49 Parada, C., Linares, et al. Surgical site infection rates in 4 cities in Colombia: Findings of  
50 the International Nosocomial Infection Control Consortium (INICC). *Am J Infect Control.*  
51 2014;42(10):1089-92.  
52  
53  
54  
55  
56  
57 13. Andert A., H.P., Alizai, C.D., Klink, N., Neitzke, C., Fitzner, C., Heidenhain, et al. Risk  
58 factors for morbidity after appendectomy. *Langenbeck's Arch Surg.* 2017;402(6):987-93.  
59  
60

- 1  
2  
3  
4  
5 14. Andersson R.E. Short-term complications and long-term morbidity of laparoscopic and  
6  
7  
8  
9  
10  
11 15. Aranda-Narváez J.M., A.J., González-Sánchez, N., Marín-Camero, C., Montiel-Casado, P.,  
12  
13 López-Ruiz, B., Sánchez-Pérez, et al. Conservative approach versus urgent appendectomy  
14  
15 in surgical management of acute appendicitis with abscess or phlegmon. Resultados del  
16  
17 tratamiento conservador inicial y de la cirugía urgente en la apenaicitis aguda evolucionada.  
18  
19 2010;102(11):648-52.
- 20  
21  
22 16. Aranda-Narváez J.M., T., Prieto-Puga Arjona, B., García-Albiach, M.C., Montiel-Casado,  
23  
24 A.J., González-Sánchez, B., Sánchez-Pérez, et al. Postappendectomy surgical site infection:  
25  
26 Overall rate and type according to open/laparoscopic approach. Infección de sitio quirúrgico  
27  
28 tras apendicectomía urgente: tasa global y tipo según la vía de abordaje  
29  
30 (abierta/laparoscópica). 2014;32(2):76-81.
- 31  
32  
33 17. Arthur T., R., Gartrell, B., Manoharan, D., Parker. Emergency appendicectomy in Australia:  
34  
35 findings from a multicentre, prospective study. ANZ J Surg. 2017;87(9):656-60.
- 36  
37  
38 18. Asefa Z. Acute appendicitis in Yirgalem Hospital, southern Ethiopia. Ethiop Med J.  
39  
40 2002;40(2):155-62.
- 41  
42  
43 19. Assefa Z., A., G/yesuse. Acute appendicitis in children admitted to zewditu memorial  
44  
45 hospital. Ethiop Med J. 2014;52(4):189-95.
- 46  
47  
48 20. Atif M.L., F., Sadaoui, A., Bezzaoucha, C.A., BezzaouchaKaddache, R., Boukari, S.,  
49  
50 Djelato, et al. Intra-abdominal abscesses and laparoscopic versus open appendectomies.  
51  
52 Infect Control Hosp Epidemiol. 2009;30(7):713-5
- 53  
54  
55  
56 21. Bae E., A., Dehal, V., Franz, M., Joannides, N., Sakis, J., Scurlock, et al. Postoperative  
57  
58 antibiotic use and the incidence of intra-abdominal abscess in the setting of suppurative  
59  
60 appendicitis: a retrospective analysis. Am J Surg.2016;212(6):1121-5.

- 1  
2  
3  
4  
5  
6 22. Bae S.U., W.K., Jeong, S.K., Baek. Single-port laparoscopic interval appendectomy for  
7 perforated appendicitis with a periappendiceal abscess. *Ann Coloproctol.* 2016;32(3):105-  
8 10.  
9  
10  
11  
12  
13 23. Baek H.N., Y.H., Jung, Y.H., Hwang. Laparoscopic versus open appendectomy for  
14 appendicitis in elderly patients. *J Korean Soc Coloproctology.* 2011;27(5):241-5.  
15  
16  
17  
18 24. Bali İ., F., Karateke, S., Özyazıcı, A., Kuvvetli, C., Oruç, E., Menekşe, et al. Comparison  
19 of intracorporeal knotting and endoloop for stump closure in laparoscopic appendectomy.  
20 *Laparoskopik appendektomide intrakorporal düğüm ve endoloop ile güdük kapama*  
21 *yöntemlerinin karşılaştırılması.* 2015;21(6):446-9.  
22  
23  
24  
25  
26  
27 25. Bhangu A., Richardson, C., Torrance, A., Pinkney, T., Collaborative, Natl Surg Res.  
28 Multicentre observational study of performance variation in provision and outcome of  
29 emergency appendicectomy. *British Journal Of Surgery.* 2013;100(9):1240-52.  
30  
31  
32  
33  
34  
35 26. Bansal V., S., Altermatt, D., Nadal, C., Berger. Lack of benefit of preoperative antimicrobial  
36 prophylaxis in children with acute appendicitis: A prospective cohort study. *Infection.*  
37 2012;40(6):635-41.  
38  
39  
40  
41  
42 27. Batajoo H., N.K., Hazra. Laparoscopic versus open appendectomy in acute appendicitis. *J*  
43 *Nepal Health Res Counc.* 2012;10(22):239-42.  
44  
45  
46  
47  
48 28. Saranga Bharathi R., V., Sharma, A., Chakladar, P., Kumari. Port exteriorisation  
49 appendectomy-our experience. *Med J Armed Forces India.* 2011;67(2):147-51.  
50  
51  
52  
53  
54 29. Biçakci U., B., Tander, M., Günaydin, R., Rizalar, E., Aritürk, S.H., Ayyildiz, et al. The  
55 comparison of open and laparoscopic appendectomy: Is there any outcome difference  
56 between non-complicated and complicated appendicitis? *Balkan Med J.* 2011;28(3):304-6.  
57  
58  
59  
60



- 1  
2  
3 30. Bickel A., M., Gurevits, R., Vamos, S., Ivry, A., Eitan. Perioperative hyperoxygenation and  
4 wound site infection following surgery for acute appendicitis : A randomized, prospective,  
5 controlled trial. *Arch Surg.* 2011;146(4):464-70.  
6  
7  
8  
9  
10  
11 31. Blackwood B.P., C.D., Gause, J.C., Harris, C.M., Theodorou, I., Helenowski, T.B., Lautz,  
12 et al. Overweight and obese pediatric patients have an increased risk of developing a  
13 surgical site infection. *Surg Infect.* 2017;18(4):491-7.  
14  
15  
16  
17  
18 32. Blakely M.L., R., Williams, M.S., Dassinger, J.W., Eubanks III, P., Fischer, E.Y., Huang,  
19 et al. Early vs interval appendectomy for children with perforated appendicitis. *Arch Surg.*  
20 2011;146(6):660-5.  
21  
22  
23  
24  
25  
26 33. Bonadio W., K., Rebillot, O., Ukwuoma, C., Saracino, A., Iskhakov. Management of  
27 Pediatric Perforated Appendicitis: Comparing Outcomes Using Early Appendectomy  
28 versus Solely Medical Management. *Pediatr Infect Dis J.* 2017;36(10):937-41.  
29  
30  
31  
32  
33 34. Boomer L.A., J.N., Cooper, K.J., Deans, P.C., Minneci, K., Leonhart, K.A., Diefenbach, et  
34 al. Does delay in appendectomy affect surgical site infection in children with appendicitis?  
35 *J Pediatr Surg.* 2014;49(6):1026-9.  
36  
37  
38  
39  
40  
41 35. Boomer L.A., J.N., Cooper, S., Anandalwar, S.C., Fallon, D., Ostlie, C.M., Leys, et al.  
42 Delaying appendectomy does not lead to higher rates of surgical site infections. *Ann Surg.*  
43 2016;264(1):164-8.  
44  
45  
46  
47  
48 36. Bozkurt M.A., M.G., Ünsal, S., Kapan, B., Kankaya, M.U., Kalaycii, H., Aliiş. Two  
49 different methods for appendiceal stump closure: Metal clip and Hem-o-lok clip. *J*  
50 *Laparoendosc Adv Surg Techn.* 2014;24(8):571-3.  
51  
52  
53  
54  
55  
56 37. Brandt C., U., Hott, D., Sohr, F., Daschner, P., Gastmeier, H., Rüden. Operating room  
57 ventilation with laminar airflow shows no protective effect on the surgical site infection rate  
58 in orthopedic and abdominal surgery. *Ann Surg.* 2008;248(5):695-700.  
59  
60

- 1  
2  
3  
4  
5  
6 38. Cairo S.B., M.V., Raval, M., Browne, H., Meyers, D.H., Rothstein. Association of same-  
7 day discharge with hospital readmission after appendectomy in pediatric patients. *JAMA*  
8 *Surg.* 2017;152(12):1106-12.  
9  
10  
11  
12  
13 39. Cameron D.B., P., Melvin, D.A., Graham, C.C., Glass, S.K., Serres, M.P., Kronman, et al.  
14 Extended Versus Narrow-spectrum Antibiotics in the Management of Uncomplicated  
15 Appendicitis in Children: A Propensity-matched Comparative Effectiveness Study. *Ann*  
16 *Surg.* 2017.  
17  
18  
19  
20  
21  
22 40. Cao J.-G., F., Tao, X.-J., Zhou, X.-G., Wang, S.-S., Wang, H., Zhang, et al. Trends and  
23 outcomes of laparoscopic appendectomy in China: A multicenter, retrospective cohort  
24 study. *Surg Pract.* 2015;19(4):166-72.  
25  
26  
27  
28  
29  
30 41. Cervantes-Sánchez C.R., R., Gutiérrez-Vega, J.A., Vázquez-Carpizo, P., Clark, C., Athié-  
31 Gutiérrez. Syringe pressure irrigation of subdermic tissue after appendectomy to decrease  
32 the incidence of postoperative wound infection. *World J Surg.* 2000;24(1):38-42.  
33  
34  
35  
36  
37 42. Chamisa I. A clinicopathological review of 324 appendices removed for acute appendicitis  
38 in Durban, South Africa: a retrospective analysis. *Ann R Coll Surg Engl.* 2009;91(8):688-  
39 92.  
40  
41  
42  
43  
44  
45 43. Chaudhary I.A., Samiullah, A.A., Mallhi, Z., Afridi, A., Bano. Is it necessary to invaginate  
46 the stump after appendectomy? *Pak J Med Sci.* 2005;21(1):35-8.  
47  
48  
49  
50  
51 44. Chen D., H., Shi, H., Dong, K., Liu, K., Ding. Gasless single-incision laparoscopic  
52 appendectomy. *Surg Endosc Interv Tech.* 2011;25(5):1472-6.  
53  
54  
55  
56 45. Chen C.-Y., Y.-C., Chen, H.-N., Pu, C.-H., Tsai, W.-T., Chen, C.-H., Lin. Bacteriology of  
57 acute appendicitis and its implication for the use of prophylactic antibiotics. *Surg Infect.*  
58 2012;13(6):383-90.  
59  
60

- 1  
2  
3  
4  
5  
6 46. Chen C.-C., C.-T., Ting, M.-J., Tsai, W.-C., Hsu, P.-C., Chen, M.-D., Lee, et al.  
7 Appendectomy timing: Will delayed surgery increase the complications? *J Chin Med*  
8 *Assoc.* 2015;78(7):395-9.  
9  
10  
11  
12 47. Chiang R.-A., S.-L., Chen, Y.-C., Tsai, M.-J., Bair. Comparison of primary wound closure  
13 versus open wound management in perforated appendicitis. *J Formos Med Assoc.*  
14 2006;105(10):791-5.  
15  
16  
17  
18  
19 48. Chiang R.-A., S.-L., Chen, Y.-C., Tsai. Delayed primary closure versus primary closure for  
20 wound management in perforated appendicitis: A prospective randomized controlled trial.  
21 *J Chin Med Assoc.* 2012;75(4):156-9.  
22  
23  
24  
25  
26  
27 49. Cho M., J., Kang, I.-K., Kim, K.Y., Lee, S.-K., Sohn. Underweight body mass index as a  
28 predictive factor for surgical site infections after laparoscopic appendectomy. *Yonsei Med*  
29 *J.* 2014;55(6):1611-6.  
30  
31  
32  
33  
34  
35 50. Choudhary S.K., S.K., Dhakaita. Appendicular mass-early appendicectomy vs interval  
36 appendicectomy. *Intl J Pharma Bio Sci.* 2014;5(1):B400-B4.  
37  
38  
39  
40  
41 51. Clyde C., T., Bax, A., Merg, M., MacFarlane, P., Lin, S., Beyersdorf, et al. Timing of  
42 intervention does not affect outcome in acute appendicitis in a large community practice.  
43 *Am J Surg.* 2008;195(5):590-3.  
44  
45  
46  
47  
48 52. Coakley B.A., E.S., Sussman, T.S., Wolfson, A.S., Bhagavath, J.J., Choi, N.E., Ranasinghe,  
49 et al. Postoperative antibiotics correlate with worse outcomes after appendectomy for  
50 nonperforated appendicitis. *J Am Coll Surg.* 2011;213(6):778-83.  
51  
52  
53  
54  
55 53. Crandall M., M.B., Shapiro, M., Worley, M.A., West. Acute uncomplicated appendicitis:  
56 case time of day influences hospital length of stay. *Surg Infect (Larchmt).* 2009;10(1):65-  
57 9.  
58  
59  
60

- 1  
2  
3  
4  
5  
6 54. Dede K., T., Mersich, A., Zaránd, I., Besznyák, Z., Baranyai, B., Atkári, et al. Laparoscopic  
7 or open appendectomy? *Laparoszkópos vagy nyílt appendectomia?* 2008;149(50):2357-61.  
8  
9  
10  
11 55. Dhiman N., A., Chi, T.M., Pawlik, D.T., Efron, E.R., Haut, E.B., Schneider, et al. Increased  
12 complications after appendectomy in patients with cerebral palsy: Are special needs patients  
13 at risk for disparities in outcomes? *Surgery*. 2013;154(3):479-85.  
14  
15  
16  
17 56. Dimitriou I., B., Reckmann, O., Nephuth, M., Betzler. Single institution's experience in  
18 laparoscopic appendectomy as a suitable therapy for complicated appendicitis.  
19 *Langenbeck's Arch Surg*. 2013;398(1):147-52.  
20  
21  
22  
23  
24  
25  
26 57. Durkin M.J., K.V., Dicks, A.W., Baker, S.S., Lewis, R.W., Moehring, L.F., Chen, et al.  
27 Seasonal variation of common surgical site infections: Does season matter? *Infect Control*  
28 *Hosp Epidemiol*. 2015;36(9):1011-6.  
29  
30  
31  
32  
33  
34 58. Ein S.H., A., Nasr, A., Ein. Open appendectomy for pediatric ruptured appendicitis: a  
35 historical clinical review of the prophylaxis of wound infection and postoperative intra-  
36 abdominal abscess. *Can J Surg*. 2013;56(3):E7-E12.  
37  
38  
39  
40  
41 59. Fukuda H. Patient-related risk factors for surgical site infection following eight types of  
42 gastrointestinal surgery. *J Hosp Infect*. 2016;93(4):347-54.  
43  
44  
45  
46  
47 60. Gandaglia G., K.R., Ghani, A., Sood, J.R., Meyers, J.D., Sammon, M., Schmid, et al. Effect  
48 of minimally invasive surgery on the risk for surgical site infections results from the national  
49 surgical quality improvement program (nsqip) database. *JAMA Surg*. 2014;149(10):1039-  
50 44.  
51  
52  
53  
54  
55  
56 61. Garcell H.G., A.V., Arias, C.A., Pancorbo Sandoval, E.G., García, M.E., Valle Gamboa,  
57 A.B., Sado, et al. Incidence and etiology of surgical site infections in appendectomies: A 3-  
58 year prospective study. *Oman Med J*. 2017;32(1):31-5.  
59  
60

- 1  
2  
3  
4  
5  
6 62. Ghnam W.M. Elderly versus young patients with appendicitis 3 years experience. *Alex J*  
7 *Med.* 2012;48(1):9-12.  
8  
9  
10  
11  
12 63. Giesen L.J., A.L., van den Boom, C.C., van Rossem, P.T., den Hoed, B.P., Wijnhoven.  
13 Retrospective Multicenter Study on Risk Factors for Surgical Site Infections after  
14 Appendectomy for Acute Appendicitis. *Dig Surg.* 2017;34(2):103-7.  
15  
16  
17  
18  
19 64. Giiti G.C., H.D., Mazigo, J., Heukelbach, W., Mahalu. HIV, appendectomy and  
20 postoperative complications at a reference hospital in Northwest Tanzania: Cross-sectional  
21 study. *AIDS Res Ther.* 2010;7.  
22  
23  
24  
25  
26  
27 65. Golub A.V., R.S., Kozlov, V.G., Pleshkov, A.P., Moskalev, R.A., Alibegov, M.A.,  
28 Chelombitko. Surgical Site Infections after Open Appendectomy and Effectiveness of  
29 Complex Approach to Their Prevention. *Khirurgiia (Mosk).* 2016(6):68-76.  
30  
31  
32  
33  
34  
35 66. Gross T.S., C., McCracken, K.F., Heiss, M.L., Wulkan, M.V., Raval. The contribution of  
36 practice variation to length of stay for children with perforated appendicitis. *J Pediatr Surg.*  
37 2016;51(8):1292-7.  
38  
39  
40  
41  
42 67. Gurien L.A., D.L., Wyrick, S.D., Smith, M.S., Dassinger. Optimal timing of appendectomy  
43 in the pediatric population. *J Surg Res.* 2016;202(1):126-31.  
44  
45  
46  
47  
48 68. Hamzaoglu I., B., Baca, D.E., Böler, E., Polat, Y., Özer. Is umbilical flora responsible for  
49 wound infection after laparoscopic surgery? *Surg Laparoscopy Endosc Percutaneous Tech.*  
50 2004;14(5):263-7.  
51  
52  
53  
54  
55 69. Harmon L.A., M.L., Davis, D.C., Jupiter, R.C., Frazee, J.L., Regner. Computed tomography  
56 to operating room in less than 3 hours minimizes complications from appendicitis. *Am J*  
57 *Surg.* 2016;212(2):246-50.  
58  
59  
60

- 1  
2  
3  
4  
5  
6 70. Helling T.S., D.F., Soltys, S., Seals. Operative versus non-operative management in the care  
7 of patients with complicated appendicitis. *Am J Surg.* 2017;214(6):1195-200.  
8  
9  
10  
11 71. Helmer K.S., E.K., Robinson, K.P., Lally, J.C., Vasquez, K.L., Kwong, T.H., Liu, et al.  
12 Standardized patient care guidelines reduce infectious morbidity in appendectomy patients.  
13 *Am J Surg.* 2002;183(6):608-13.  
14  
15  
16  
17  
18 72. Hesami M.A., H., Alipour, H., Nikoupour Daylami, B., Alipour, S., Bazargan-Hejazi, A.,  
19 Ahmadi. Irrigation of abdomen with imipenem solution decreases surgical site infections in  
20 patients with perforated appendicitis: A randomized clinical trial. *Iran Red Crescent MedJ.*  
21 2014;16(4).  
22  
23  
24  
25  
26  
27  
28 73. Horvath P., J., Lange, R., Bachmann, F., Struller, A., Königsrainer, M., Zdichavsky.  
29 Comparison of clinical outcome of laparoscopic versus open appendectomy for complicated  
30 appendicitis. *Surg Endosc Interv Tech.* 2017;31(1):199-205.  
31  
32  
33  
34  
35  
36 74. Hughes M.J., E., Harrison, S., Paterson-Brown. Post-operative antibiotics after  
37 appendectomy and post-operative abscess development: A retrospective analysis. *Surg*  
38 *Infect.* 2013;14(1):56-61.  
39  
40  
41  
42  
43 75. Hussain M.I., M.K., Alam, H.H., Al-Qahatani, M.H., Al-Akeely. Role of postoperative  
44 antibiotics after appendectomy in non-perforated appendicitis. *J Coll Phys Surg Pak.*  
45 2012;22(12):756-9.  
46  
47  
48  
49  
50  
51 76. Iqbal M., M., Jawaid, A., Qureshi, S., Iqbal. Effect of povidone-iodine irrigation on post  
52 appendectomy wound infection: Randomized control trial. *J Postgrad Med Inst.*  
53 2015;29(3):160-4.  
54  
55  
56  
57  
58 77. Iñigo J.J., B., Bermejo, B., Oronoz, J., Herrera, A., Tarifa, F., Pérez, et al. Surgical site  
59 infection in general surgery: 5-year analysis and assessment of the National Nosocomial  
60

- 1  
2  
3 Infection Surveillance (NNIS) index. Infección de sitio quirúrgico en un servicio de cirugía  
4 general Análisis de cinco años y valoración del índice National Nosocomial Infection  
5 Surveillance (NNIS). 2006;79(4):224-30.  
6  
7  
8  
9  
10  
11 78. Javadi S.M.R., S.Y., Zarghami, P., Ghaderzadeh, M., Ghorbanpoor, H.R., Makarchian, A.,  
12 Derakhshanfar, et al. Comparison of small access and classic McBurney's incisions for open  
13 appendectomy: A randomized controlled trial. Shiraz E Med J. 2017;18(10).  
14  
15  
16  
17  
18 79. Jenkins P.C., M.K., Oerline, A.J., Mullard, M.J., Englesbe, D.A., Campbell, M.R.,  
19 Hemmila. Hospital variation in outcomes following appendectomy in a regional quality  
20 improvement program. Am J Surg. 2016;212(5):857-62.  
21  
22  
23  
24  
25  
26 80. Kang J., B.N., Bae, G., Gwak, I., Park, H., Cho, K., Yang, et al. Comparative study of a  
27 single-incision laparoscopic and a conventional laparoscopic appendectomy for the  
28 treatment of acute appendicitis. J Korean Soc Coloproctology. 2012;28(6):304-8.  
29  
30  
31  
32  
33  
34 81. Kapischke M., A., Pries, A., Caliebe. Short term and long term results after open vs.  
35 Laparoscopic appendectomy in childhood and adolescence: A subgroup analysis. BMC  
36 Pediatr. 2013;13(1).  
37  
38  
39  
40  
41 82. Karam P.A., A., Hiuser, D., Magnuson, F.G.F., Seifarth. Intracorporeal hybrid single port  
42 vs conventional laparoscopic appendectomy in children. Pediatr Med Chir. 2016;38(3):89-  
43 92.  
44  
45  
46  
47  
48  
49 83. Karam P.A., A., Mohan, M.R., Buta, F.G., Seifarth. Comparison of Transumbilical  
50 Laparoscopically Assisted Appendectomy to Conventional Laparoscopic Appendectomy in  
51 Children. Surg Laparoscopy Endosc Percutaneous Tech. 2016;26(6):508-12.  
52  
53  
54  
55  
56 84. Kasatpibal N., S., Jamulitrat, V., Chongsuvivatwong. Standardized incidence rates of  
57 surgical site infection: A multicenter study in Thailand. Am J Infect Control.  
58 2005;33(10):587-94.  
59  
60



- 1  
2  
3  
4  
5  
6 85. Kasatpibal N., M., Nørgaard, H.T., Sørensen, H.C., Schönheyder, S., Jamulitrat, V.,  
7 Chongsuvivatwong. Risk of surgical site infection and efficacy of antibiotic prophylaxis: A  
8 cohort study of appendectomy patients in Thailand. *BMC Infect Dis.* 2006;6.  
9  
10  
11  
12  
13 86. Kato Y., T., Marusasa, S., Ichikawa, G.J., Lane, T., Okazaki, A., Yamataka. Lapprotector  
14 use decreases incisional wound infections in cases of perforated appendicitis: a prospective  
15 study. *Asian J Surg.* 2008;31(3):101-3.  
16  
17  
18  
19  
20 87. Kell M.R., K., Power, D.C., Winter, C., Power, C., Shields, W.O., Kirwan, et al. Predicting  
21 outcome after appendectomy. *Ir J Med Sci.* 2003;172(2):63-5.  
22  
23  
24  
25  
26 88. Khan M.N., T., Fayyad, T.D., Cecil, B.J., Moran. Laparoscopic versus open appendectomy:  
27 the risk of postoperative infectious complications. *JLS.* 2007;11(3):363-7.  
28  
29  
30  
31  
32 89. Khan K.I., S., Mahmood, M., Akmal, A., Waqas. Comparison of rate of surgical wound  
33 infection, length of hospital stay and patient convenience in complicated appendicitis  
34 between primary closure and delayed primary closure. *J Pak Med Assoc.* 2012;62(8):596-  
35 8.  
36  
37  
38  
39  
40  
41  
42 90. Khan I., M.I., Khan, M., Jawed, U., Shaikh, S., Ahmed, A., Arif. To compare the frequency  
43 of superficial surgical site infection after laparoscopic versus open appendectomy. *Med*  
44 *Forum Monthly.* 2014;25(11):52-5.  
45  
46  
47  
48  
49 91. Khiria L.S., R., Ardhari, N., Mohan, P., Kumar, R., Nambiar. Laparoscopic  
50 appendectomy for complicated appendicitis: Is it safe and justified? A retrospective  
51 analysis. *Surg Laparoscopy Endosc Percutaneous Tech.* 2011;21(3):142-5.  
52  
53  
54  
55  
56 92. Kılıç Ş.S., S., Ekinçi, İ., Karnak, A.Ö., Çiftçi, F.C., Tanyel, M.E., Şenocak. Drainage  
57 systems' effect on surgical site infection in children with perforated appendicitis. *Drenaj*  
58 *Sistemlerinin perfore apandisitli çocuklarda cerrahi alan enfeksiyonuna etkisi.*  
59  
60

2016;7(5):591-4.

93. Kim M.J., F.J., Fleming, D.D., Gunzler, S., Messing, R.M., Salloum, J.R.T., Monson. Laparoscopic appendectomy is safe and efficacious for the elderly: An analysis using the National Surgical Quality Improvement Project database. *Surg Endosc Interv Tech.* 2011;25(6):1802-7.
94. Kim J.H., H.Y., Kim, S.K., Park, J.S., Lee, D.S., Heo, S.W., Park, et al. Single-incision laparoscopic appendectomy versus conventional laparoscopic appendectomy: Experiences from 1208 cases of single-incision laparoscopic appendectomy. *Ann Surg.* 2015;262(6):1054-8.
95. Kim J.K., J., Kang, W.R., Kim, E.J., Park, S.H., Baik, K.Y., Lee. Does Conversion Adversely Impact the Clinical Outcomes for Patients with Complicated Appendicitis? *J Laparoendosc Adv Surg Techn.* 2016;26(8):635-40.
96. Kiriakopoulos A., D., Tsakayannis, D., Linos. Laparoscopic management of complicated appendicitis. *JLS.* 2006;10(4):453-6.
97. Kirshtein B., Z.H., Perry, S., Mizrahi, L., Lantsberg. Value of laparoscopic appendectomy in the elderly patient. *World J Surg.* 2009;33(5):918-22.
98. Kiudelis M., P., Ignatavicius, K., Zviniene, S., Grizas. Analysis of intracorporeal knotting with invaginating suture versus endoloops in appendiceal stump closure. *Wideochir Inne Tech Ma?oinwazyjne.* 2013;8(1):69-73.
99. Kleif J., L., Rasmussen, S., Fonnes, P., Tibæk, A., Daoud, H., Lund, et al. Enteral Antibiotics are Non-inferior to Intravenous Antibiotics After Complicated Appendicitis in Adults: A Retrospective Multicentre Non-inferiority Study. *World J Surg.* 2017;41(11):2706-14.

- 1  
2  
3 100. Koizumi N., H., Kobayashi, Y., Nakase, T., Takagi, K., Fukumoto. Efficacy of  
4 transumbilical laparoscopic-assisted appendectomy for appendicitis: a four-year experience  
5 at a single center. *Surg Today*. 2015;45(10):1245-9.  
6  
7  
8  
9  
10  
11 101. Shimizu T., M., Ishizuka, K., Kubota. The preoperative serum C-reactive protein level  
12 is a useful predictor of surgical site infections in patients undergoing appendectomy. *Surg*  
13 *Today*. 2015;45(11):1404-10.  
14  
15  
16  
17  
18 102. Kumamoto K., H., Imaizumi, N., Hokama, T., Ishiguro, K., Ishibashi, K., Baba, et al.  
19 Recent trend of acute appendicitis during pregnancy. *Surg Today*. 2015;45(12):1521-6.  
20  
21  
22  
23  
24 103. Kumar B., A., Samad, T.W., Khanzada, M.H., Laghari, A.R., Shaikh. Superiority of  
25 laparoscopic appendectomy over open appendectomy: The Hyderabad experience. *Rawal*  
26 *Med J*. 2008;33(2):165-8.  
27  
28  
29  
30  
31  
32 104. Kumar S., A., Jalan, B.N., Patowary, S., Shrestha. Laparoscopic appendectomy versus  
33 open appendectomy for acute appendicitis: A prospective comparative study. *Kathmandu*  
34 *Univ Med J*. 2016;14(55):244-8.  
35  
36  
37  
38  
39 105. Lacher M., O.J., Muensterer, G.R., Yannam, C.J., Aprahamian, L., Perger, M., Megison,  
40 et al. Feasibility of single-incision pediatric endosurgery for treatment of appendicitis in  
41 415 children. *J Laparoendosc Adv Surg Techn*. 2012;22(6):604-8.  
42  
43  
44  
45  
46 106. Lasses-Martínez B., E., Ortiz-Oshiro, J.L., Cabañas-Ojeda, P., Benito-Expósito, C.,  
47 Fernández-Pérez, J., Alvarez Fernández-Represa. Cost is not a drawback to perform  
48 laparoscopic appendectomy in an academic hospital. *Surg Laparoscopy Endosc*  
49 *Percutaneous Tech*. 2014;24(4):e123-e7.  
50  
51  
52  
53  
54  
55  
56 107. Le D., W., Rusin, B., Hill, J., Langell. Post-operative antibiotic use in nonperforated  
57 appendicitis. *Am J Surg*. 2009;198(6):748-52.  
58  
59  
60

- 1  
2  
3  
4  
5 108. Lee P., K., Waxman, B., Taylor, S., Yim. Use of wound-protection system and  
6 postoperative wound-infection rates in open appendectomy: A randomized prospective  
7 trial. *Arch Surg.* 2009;144(9):872-5.  
8  
9  
10  
11  
12 109. Lee S.L., S., Shekherdimian, V.Y., Chiu. Comparison of pediatric appendicitis  
13 outcomes between teaching and nonteaching hospitals. *J Pediatr Surg.* 2010;45(5):894-7.  
14  
15  
16  
17 110. Lee J.A., K.Y., Sung, J.H., Lee, D.S., Lee. Laparoscopic appendectomy with a single  
18 incision in a single institute. *J Korean Soc Coloproctology.* 2010;26(4):260-4.  
19  
20  
21  
22  
23 111. Lee S.-Y., H.-M., Lee, C.-S., Hsieh, J.-H., Chuang. Transumbilical laparoscopic  
24 appendectomy for acute appendicitis: A reliable one-port procedure. *Surg Endosc Interv*  
25 *Tech.* 2011;25(4):1115-20.  
26  
27  
28  
29  
30 112. Lee S.L., A., Yaghoubian, A., Kaji. Laparoscopic vs open appendectomy in children:  
31 Outcomes comparison based on age, sex, and perforation status. *Arch Surg.*  
32 2011;146(10):1118-21.  
33  
34  
35  
36  
37  
38  
39 113. Lee S.M., G.S., Hwang, D.S., Lee. Single-incision laparoscopic appendectomy using  
40 homemade glove port at low cost. *J Minimal Access Surg.* 2016;12(2):124-8.  
41  
42  
43  
44  
45 114. Levy S.M., G., Holzmann-Pazgal, K.P., Lally, K., Davis, L.S., Kao, K., Tsao. Quality  
46 check of a quality measure: Surgical wound classification discrepancies impact risk-  
47 stratified surgical site infection rates in pediatric appendicitis. *J Am Coll Surg.*  
48 2013;217(6):969-73.  
49  
50  
51  
52  
53 115. Li P., Q., Xu, Z., Ji, Y., Gao, X., Zhang, Y., Duan, et al. Comparison of surgical stress  
54 between laparoscopic and open appendectomy in children. *J Pediatr Surg.* 2005;40(8):1279-  
55 83.  
56  
57  
58  
59  
60

- 1  
2  
3 116. Lim S.G., E.J., Ahn, S.Y., Kim, I.Y., Chung, J.-M., Park, S.H., Park, et al. A clinical  
4 comparison of laparoscopic versus open appendectomy for complicated appendicitis. J  
5 Korean Soc Coloproctology. 2011;27(6):293-7.  
6  
7  
8  
9  
10  
11 117. Geraldo José de Souza Lima, Silva, Alcino Lázaro da, Castro, Eduardo Godoy, Abras,  
12 Gustavo Munayer, Pires, Lívio José Suretti, Leite, Rodrigo Fabiano Guedes. Efetividade e  
13 segurança da apendicectomia videoassistida em porta única transumbilical em adolescentes  
14 e adultos X1 Effectiveness and safeness of single-port trans-umbilical laparoscopic  
15 appendectomy done in adolescents and adults. Revista do Colégio Brasileiro de Cirurgiões.  
16 2008;35(4):244-51.  
17  
18  
19  
20  
21  
22  
23 118. Lin H.-F., J.-M., Wu, L.-M., Tseng, K.-H., Chen, S.-H., Huang, I.-R., Lai. Laparoscopic  
24 Versus Open Appendectomy for Perforated Appendicitis. J Gastrointest Surg.  
25 2006;10(6):906-10.  
26  
27  
28  
29  
30  
31 119. Litz C.N., S.M., Farach, P.D., Danielson, N.M., Chandler. Obesity and single-incision  
32 laparoscopic appendectomy in children. J Surg Res. 2016;203(2):283-6.  
33  
34  
35  
36  
37 120. Liu C., W., Wang, Y., Sun, M., Xu, H., Zhuang, H., Chen, et al. Efficacy and  
38 complications of laparoscopic appendectomy for pediatric appendicitis. Int J Clin Exp Med.  
39 2017;10(9):13784-9.  
40  
41  
42  
43  
44 121. Mahmood M.M., A., Shahab, M.A., Razzaq. Surgical site infection in open versus  
45 laparoscopic appendectomy. Pak J Med Health Sci. 2016;10(3):1076-8.  
46  
47  
48  
49  
50 122. Mbah N., W.Ek., Opara, N.P., Agwu. Waiting time among acute abdominal  
51 emergencies in a Nigerian teaching hospital: Causes of delay and consequences. Niger J  
52 Surg Res. 2006;8(1):69-73.  
53  
54  
55  
56  
57 123. Memon G.A., A.I., Memon, S.K.A., Shah, R.A., Sahito, Habib-Ur-Rehman, S., Leghari,  
58 et al. An experience of treatment outcome in acute appendicitis with antibiotics and  
59  
60

- 1  
2  
3 appendectomy at a tertiary care hospital. *Med Forum Monthly*. 2017;28(3):136-40.  
4  
5  
6  
7 124. Menezes M., L., Das, M., Alagtal, J., Haroun, P., Puri. Laparoscopic appendectomy is  
8 recommended for the treatment of complicated appendicitis in children. *Pediatr Surg Int*.  
9 2008;24(3):303-5.  
10  
11  
12  
13  
14 125. Merenda M., A., Litarski, P., Kabziński, D., Janczak. Laparoscopic appendectomy as  
15 an alternative to conventional procedure - results in our own material. *Pol Przegl Chir*.  
16 2013;85(6):323-8.  
17  
18  
19  
20  
21 126. Michailidou M., M.G., Sacco Casamassima, S.D., Goldstein, C., Gause, O., Karim, J.H.,  
22 Salazar, et al. The impact of obesity on laparoscopic appendectomy: Results from the ACS  
23 National Surgical Quality Improvement Program pediatric database. *J Pediatr Surg*.  
24 2015;50(11):1880-4.  
25  
26  
27  
28  
29  
30 127. Michailidou M., S.D., Goldstein, M.G., Sacco Casamassima, J.H., Salazar, R., Elliott,  
31 J., Hundt, et al. Laparoscopic versus open appendectomy in children: The effect of surgical  
32 technique on healthcare costs. *Am J Surg*. 2015;210(2):270-5.  
33  
34  
35  
36  
37  
38 128. Mickovic I.N., Z., Golubovic, S., Mickovic, D., Vukovic, S., Trajkovic, S.S.,  
39 Antunovic, et al. A comparative analysis of laparoscopic appendectomy in relation to the  
40 open appendectomy in children. *Uporedna analiza laparoscopske apendektomije u odnosu*  
41 *na otvorenu apendektomiju kod dece*. 2016;17(1):49-53.  
42  
43  
44  
45  
46  
47 129. Ming P.C., T.Y., Yee Yan, L.H., Tat. Risk factors of postoperative infections in adults  
48 with complicated appendicitis. *Surg Laparoscopy Endosc Percutaneous Tech*.  
49 2009;19(3):244-8.  
50  
51  
52  
53  
54  
55 130. Mingmalairak C., P., Ungbhakorn, V., Paocharoen. Efficacy of antimicrobial coating  
56 suture coated polyglactin 910 with tricosan (Vicryl Plus) compared with polyglactin 910  
57 (Vicryl) in reduced surgical site infection of appendicitis, double blind randomized control  
58  
59  
60

- 1  
2  
3 trial, preliminary safety report. *J Med Assoc Thailand*. 2009;92(6):770-5.  
4  
5  
6  
7  
8 131. Miyano G., T., Okazaki, Y., Kato, T., Marusasa, T., Takahashi, G.J., Lane, et al. Open  
9 versus laparoscopic treatment for pan-peritonitis secondary to perforated appendicitis in  
10 children: A prospective analysis. *J Laparoendosc Adv Surg Techn*. 2010;20(7):655-7.  
11  
12  
13  
14  
15 132. Moazzez A., R.J., Mason, N., Katkhouda. Thirty-day outcomes of laparoscopic versus  
16 open appendectomy in elderly using ACS/NSQIP database. *Surg Endosc Interv Tech*.  
17 2013;27(4):1061-71.  
18  
19  
20  
21  
22 133. Mohammad Taghi Rajabi-Mashhadi, Mousavi, Seyed Hadi, Khosravi-Mashizi, M. H.,  
23 Ghayour-Mobarhan, Majid, Sahebkar, Amirhossein. Optimum duration of perioperative  
24 antibiotic therapy in patients with acute non-perforated appendicitis: a prospective  
25 randomized trial. *Asian Biomedicine*. 2012;6(6):891-4.  
26  
27  
28  
29  
30  
31 134. Monge Jodra V., A., Robustillo Rodela, F., Martin Martinez, N., López Fresneña, S.,  
32 Oña Compán, F., Calbo Torrecillas, et al. Standardized infection ratios for three general  
33 surgery procedures: A comparison between Spanish hospitals and U.S. centers participating  
34 in the national nosocomial infections surveillance system. *Infect Control Hosp Epidemiol*.  
35 2003;24(10):744-8.  
36  
37  
38  
39  
40  
41 135. Mueck K.M., L.R., Putnam, K.T., Anderson, K.P., Lally, K., Tsao, L.S., Kao. Does  
42 compliance with antibiotic prophylaxis in pediatric simple appendicitis matter? *J Surg Res*.  
43 2017;216:1-8.  
44  
45  
46  
47  
48  
49  
50 136. Muensterer O.J., C., Puga Nougues, O.O., Adibe, S.R., Amin, K.E., Georgeson, C.M.,  
51 Harmon. Appendectomy using single-incision pediatric endosurgery for acute and  
52 perforated appendicitis. *Surg Endosc Interv Tech*. 2010;24(12):3201-4.  
53  
54  
55  
56  
57 137. Muensterer O.J., R., Keijzer. A simple vacuum dressing reduces the wound infection  
58 rate of single-incision pediatric endosurgical appendectomy. *J Soc Laparoendoscopic Surg*.  
59  
60



- 2011;15(2):147-50.
138. Mustafa M.I.T., S.M., Chaudhry, R.I.T., Mustafa. Comparison of early outcome between patients of open appendectomy with and without drain for perforated appendicitis. *Pak J Med Health Sci.* 2016;10(3):890-3.
139. Nadler E.P., K.K., Reblock, H.R., Ford, B.A., Gaines. Monotherapy versus multi-drug therapy for the treatment of perforated appendicitis in children. *Surg Infect.* 2003;4(4):327-33.
140. Nataraja R.M., A., Bandi, S.A., Clarke, M.J., Haddad. Comparison of intra-abdominal abscess formation following laparoscopic and open appendectomy in children. *J Laparoendosc Adv Surg Techn.* 2010;20(4):391-4.
141. Nataraja R.M., W.J., Teague, J., Galea, L., Moore, M.J., Haddad, T., Tsang, et al. Comparison of intraabdominal abscess formation after laparoscopic and open appendectomies in children. *J Pediatr Surg.* 2012;47(2):317-21.
142. Norton Pérez, Romero, Marcela, Castelblanco, María Isabel, Rodríguez, Emma Isabel. Infección del sitio operatorio de apendicectomías en un hospital de la orinoquia colombiana X1 Surgical site infection following appendectomy at a hospital in the Colombian Orinoco river basin (Colombian Orinoquia). *Revista Colombiana de Cirugía.* 2009;24(1):23-30.
143. Obayashi J., K., Ohyama, S., Manabe, K., Tanaka, H., Nagae, H., Shima, et al. Are there reliable indicators predicting post-operative complications in acute appendicitis? *Pediatr Surg Int.* 2015;31(12):1189-93.
144. Obinwa O., C., Peirce, M., Cassidy, T., Fahey, J., Flynn. A model predicting perforation and complications in paediatric appendectomy. *Int J Colorectal Dis.* 2015;30(4):559-65.
145. Ohene-Yeboah M., B., Togbe. An audit of appendicitis and appendectomy in Kumasi,

- 1  
2  
3 Ghana. West Afr J Med. 2006;25(2):138-43.  
4  
5  
6  
7  
8 146. Okkyung Suh, 신완균, 강성희, 양대현. Appropriate Duration of Prophylactic  
9  
10 Antibiotics in Acute Nonperforated Appendicitis Z1 급성 비천공성 충수염 수술시  
11  
12 예방적 항균제의 사용기간. Korean Journal of Clinical Pharmacy S1 한국임상약학회지.  
13  
14 2002;12(2):65-70.  
15  
16  
17  
18  
19  
20  
21 147. Francisco Gabriel Onieva, Roldán, Sara, Domínguez, José Ramón, Montero, Juan  
22 Pedro, Galnares, Alfonso, Peralta, Jordi. Abordaje laparoscópico frente a enfoque clásico  
23 en el tratamiento de la apendicitis aguda X1 Laparoscopic approach versus classic open  
24 procedure in the treatment of acute appendicitis. Revista Colombiana de Cirugía.  
25 2017;32(1):26-31.  
26  
27  
28  
29  
30  
31  
32 148. Page A.J., J.D., Pollock, S., Perez, S.S., Davis, E., Lin, J.F., Sweeney. Laparoscopic  
33 Versus Open Appendectomy: An Analysis of Outcomes in 17,199 Patients Using  
34 ACS/NSQIP. J Gastrointest Surg. 2010;14(12):1955-62.  
35  
36  
37  
38  
39  
40 149. Palesty J.A., X.J., Wang, R.C., Rutland, J., Leighton, S.J., Dudrick, A., Benbrahim.  
41 Fifty-five consecutive laparoscopic appendectomy procedures without conversion. JSLS.  
42 2004;8(2):141-5.  
43  
44  
45  
46  
47 150. Pandit R.K. Safe and feasible time limit for early appendectomy in appendiceal mass.  
48 Kathmandu Univ Med J. 2016;14(55):210-4.  
49  
50  
51  
52  
53 151. Parcels J.P., J.P., Mileski, F.T., Gnagy, A.F., Haragan, W.J., Mileski. Using  
54 antimicrobial solution for irrigation in appendicitis to lower surgical site infection rates. Am  
55 J Surg. 2009;198(6):875-80.  
56  
57  
58  
59  
60

- 1  
2  
3  
4  
5  
6  
7  
8  
9  
10  
11  
12  
13  
14  
15  
16  
17  
18  
19  
20  
21  
22  
23  
24  
25  
26  
27  
28  
29  
30  
31  
32  
33  
34  
35  
36  
37  
38  
39  
40  
41  
42  
43  
44  
45  
46  
47  
48  
49  
50  
51  
52  
53  
54  
55  
56  
57  
58  
59  
60
152. Park H.-C., M.J., Kim, B.H., Lee. Effect of a Standardized Protocol of Antibiotic Therapy on Surgical Site Infection after Laparoscopic Surgery for Complicated Appendicitis. *Surg Infect.* 2017;18(6):684-8.
153. Seongmun Park, Park, Min-Su, Lee, Kil-Yeon. Relationship between the Hospital Visit-to-Operation Time Interval and the Risk of Appendiceal Perforation and Clinical Outcomes. *Journal of Minimally Invasive Surgery.* 2018;21(1):31-7.
154. Reoyo Pascual J.F., R., León Miranda, C., Cartón Hernández, E., Alonso Alonso, R.M., Martínez Castro, J., Sánchez Manuel. Laparoscopic appendectomy by 'glove port' system: Our first 100 cases. *Apendicectomía laparoscópica por sistema «glove port»: nuestros primeros 100 casos.* 2017;69(6):467-71.
155. Patrice Lemieux., Pascal Rheaume., Isabelle Levesque., Emmanuel Bujold., Gaetan Brochu. Laparoscopic appendectomy in pregnant patients: a review of 45 cases. *Surg Endosc.*2009; 23:1701.
156. Patel S.C., G.F., Jumba, S., Akmal. Laparoscopic appendectomy at the Aga Khan Hospital, Nairobi. *East Afr Med J.* 2003;80(9):447-51.
157. Percy C., K., Almahmoud, T., Jackson, C., Hartline, A., Cahill, L., Spence, et al. Risky business? Investigating outcomes of patients undergoing urgent laparoscopic appendectomy on antithrombotic therapy. *Am J Surg.* 2017;214(6):1012-5.
158. Pishori T., A.R., Siddiqui, M., Ahmed. Surgical wound infection surveillance in general surgery procedures at a teaching hospital in Pakistan. *Am J Infect Control.* 2003;31(5):296-301.
159. Putnam L.R., T.G., Ostovar-Kermani, A., Le Blanc, K.T., Anderson, G., Holzmann-Pazgal, K.P., Lally, et al. Surgical site infection reporting: more than meets the agar. *J*

- 1  
2  
3       Pediatr Surg. 2017;52(1):156-60.  
4  
5  
6  
7  
8       160. Al-Qahtani S.M., H.M., Al-Amoudi, S., Al-Jehani, A.S., Ashour, M.R., Abd-Hammad,  
9       O.R., Tawfik, et al. Post-appendectomy surgical site infection rate after using an  
10       antimicrobial film incise drape: A prospective study. Surg Infect. 2015;16(2):155-8.  
11  
12  
13  
14  
15       161. Quezada F., N., Quezada, R., Mejia, A., Brañes, O., Padilla, N., Jarufe, et al.  
16       Laparoscopic versus open approach in the management of appendicitis complicated  
17       exclusively with peritonitis: A single center experience. Int J Surg. 2015;13:80-3.  
18  
19  
20  
21  
22       162. Raakow J., H.-G., Liesaus, P., Neuhaus, R., Raakow. Single-incision versus multiport  
23       laparoscopic appendectomy: a case-matched comparative analysis. Surg Endosc Interv  
24       Tech. 2015;29(6):1530-6.  
25  
26  
27  
28  
29       163. Ríos J., C., Murillo, G., Carrasco, C., Humet. Increase in costs attributable to surgical  
30       infection after appendectomy and colectomy. Incremento de costes atribuible a la  
31       infección quirúrgica de la apendicectomía y colectomía. 2003;17(3):218-25.  
32  
33  
34  
35  
36  
37       164. Rafiq M.S., M.M., Khan, A., Khan, H., Jan. Evaluation of postoperative antibiotics after  
38       non-perforated appendectomy. J Pak Med Assoc. 2015;65(8):815-7.  
39  
40  
41  
42  
43  
44  
45       165. Reinisch A., J., Heil, G., Woeste, W., Bechstein, J., Liese. The meteorological influence  
46       on seasonal alterations in the course of acute appendicitis. J Surg Res. 2017;217:137-43.  
47  
48  
49  
50  
51       166. Romano A., P., Parikh, P., Byers, N., Namias. Simple acute appendicitis versus non-  
52       perforated gangrenous appendicitis: Is there a difference in the rate of post-operative  
53       infectious complications? Surg Infect. 2014;15(5):517-20.  
54  
55  
56  
57  
58       167. Romel Hilaire, Fernández, Zenén Rodríguez, García, Lázaro Ibrahim Romero, Sánchez,  
59       Luis Pablo Rodríguez. Apendicectomía videolaparoscópica frente a apendicectomía  
60

- 1  
2  
3 convencional X1 Laparoscopic versus conventional appendectomy. *Revista Cubana de*  
4 *Cirugía*. 2014;53(1):30-40.  
5  
6  
7  
8  
9 168. Romy S., M.-C., Eisenring, V., Bettschart, C., Petignat, P., Francioli, N., Troillet.  
10 Laparoscope use and surgical site infections in digestive surgery. *Ann Surg*.  
11 2008;247(4):627-32.  
12  
13  
14  
15  
16 169. Rooh-ul-Muqim, M., Khan, M., Zarin. Experience of laparoscopic appendectomies  
17 versus open appendectomies. *Pak J Med Sci*. 2010;26(2):324-8.  
18  
19  
20  
21  
22 170. Van Rossem C.C., M.H.F., Schreinemacher, K., Treskes, R.M., Van Hogeand,  
23 A.A.W., Van Geloven. Duration of antibiotic treatment after appendectomy for acute  
24 complicated appendicitis. *Br J Surg*. 2014;101(6):715-9.  
25  
26  
27  
28  
29  
30 171. Van Rossem C.C., M.D., Bolmers, M.H., Schreinemacher, A.A., van Geloven, W.A.,  
31 Bemelman. Prospective nationwide outcome audit of surgery for suspected acute  
32 appendicitis. *Br J Surg*. 2016;103(1):144-51.  
33  
34  
35  
36  
37 172. Viet Hung N., T., Anh Thu, V.D., Rosenthal, D., Tat Thanh, N., Quoc Anh, N., Le Bao  
38 Tien, et al. Surgical site infection rates in seven cities in Vietnam: Findings of the  
39 international nosocomial infection control consortium. *Surg Infect*. 2016;17(2):243-9.  
40  
41  
42  
43  
44 173. Rotermann M. Infection after cholecystectomy, hysterectomy or appendectomy. *Health*  
45 *Rep*. 2004;15(4):11-23.  
46  
47  
48  
49 174. Saar S., P., Talving, J., Laos, T., Põdrämägi, M., Sokirjanski, T., Lustenberger, et al.  
50 Delay Between Onset of Symptoms and Surgery in Acute Appendicitis Increases  
51 Perioperative Morbidity: A Prospective Study. *World J Surg*. 2016;40(6):1308-14.  
52  
53  
54  
55  
56 175. Saber A.A., M.H., Elgamal, T.H., El-Ghazaly, A.V., Dewoolkar, A., Akl. Simple  
57 technique for single incision transumbilical laparoscopic appendectomy. *Int J Surg*.  
58 2010;8(2):128-30.  
59  
60

- 1  
2  
3  
4  
5 176. Sadraei-Moosavi S.-M., N., Nikhbakhsh, A.-A., Darzi. Postoperative antibiotic therapy  
6 after appendectomy in patients with non-perforated appendicitis. *Caspian J Int Med.*  
7 2017;8(2):104-7.  
8  
9  
10  
11  
12 177. Saha N., D.K., Saha, M.A., Rahman, M.K., Islam, M.A., Aziz. Comparison of post  
13 operative morbidity between laparoscopic and open appendectomy in children.  
14 *Mymensingh Med J.* 2010;19(3):348-52.  
15  
16  
17  
18 178. Sahm M., R., Kube, S., Schmidt, C., Ritter, M., Pross, H., Lippert. Current analysis of  
19 endoloops in appendiceal stump closure. *Surg Endosc Interv Tech.* 2011;25(1):124-9.  
20  
21  
22  
23  
24 179. Sahm M., M., Pross, R., Otto, A., Koch, I., Gastinger, H., Lippert. Clinical health service  
25 research on the surgical therapy of acute appendicitis: Comparison of outcomes based on 3  
26 German multicenter quality assurance studies over 21 years. *Ann Surg.* 2015;262(2):338-  
27 46.  
28  
29  
30  
31  
32  
33 180. Salö M., E., Järbur, M., Hambraeus, B., Ohlsson, P., Stenström, E., Arnbjörnsson. Two-  
34 trocar appendectomy in children - description of technique and comparison with  
35 conventional laparoscopic appendectomy. *BMC Surg.* 2016;16(1):52.  
36  
37  
38  
39 181. Sánchez-Santana T., J.A., del-Moral-Luque, P., Gil-Yonte, L., Bañuelos-Andrío, M.,  
40 Durán-Poveda, G., Rodríguez-Caravaca. Effect of compliance with an antibiotic  
41 prophylaxis protocol in surgical site infections in appendectomies. Prospective cohort  
42 study. Efecto de la adecuación a protocolo de la profilaxis antibiótica en la incidencia de  
43 infección quirúrgica en apendicectomías Estudio de cohortes prospectivo. 2017;85(3):208-  
44 13.  
45  
46  
47  
48  
49  
50  
51 182. Sauvain M.-O., K., Slankamenac, M.K., Muller, S., Wildi, U., Metzger, W., Schmid, et  
52 al. Delaying surgery to perform CT scans for suspected appendicitis decreases the rate of  
53 negative appendectomies without increasing the rate of perforation nor postoperative  
54 complications. *Langenbeck's Arch Surg.* 2016;401(5):643-9.  
55  
56  
57  
58  
59  
60

- 1  
2  
3 183. Scarborough J.E., K.M., Bennett, T.N., Pappas. Racial disparities in outcomes after  
4 appendectomy for acute appendicitis. *Am J Surg.* 2012;204(1):11-7.  
5  
6  
7  
8 184. Seifarth F.G., N., Kundu, A.D., Guerron, M.M., Garland, M.W., Gaffley, S., Worley, et  
9 al. Umbilical Negative Pressure Dressing for Transumbilical Appendectomy in Children.  
10 *JLS.* 2016;20(4).  
11  
12  
13  
14  
15 185. Federico G. Seifarth, Kundu, Neilendu, Guerron, Alfredo D., Garland, Mary M.,  
16 Gaffley, Michaela W. G., Worley, Sarah, et al. Umbilical Negative Pressure Dressing for  
17 Transumbilical Appendectomy in Children. *JLS-JOURNAL OF THE SOCIETY OF*  
18 *LAPAROENDOSCOPIC SURGEONS.* 2016;20(4).  
19  
20  
21  
22  
23  
24 186. Senekjian L., R., Nirula. Tailoring the operative approach for appendicitis to the patient:  
25 A prediction model from national surgical quality improvement program data. *J Am Coll*  
26 *Surg.* 2013;216(1):34-40.  
27  
28  
29  
30  
31 187. Sesia S.B., M., Frech, F.-M., Häcker, J., Mayr. Laparoscopic "single-port"  
32 appendectomy in children. *Laparoskopische "single port"-appendektomie im kindesalter.*  
33 2011;136(1):50-5.  
34  
35  
36  
37  
38 188. Shaikh A.R., S., Khatoon, M., Arif. Evaluation of re-admission after open  
39 appendicectomy. *Rawal Med J.* 2011;36(2):100-3.  
40  
41  
42  
43  
44  
45 189. Shang Q., Q., Geng, X., Zhang, C., Guo. The efficacy of combined therapy with  
46 metronidazole and broad-spectrum antibiotics on postoperative outcomes for pediatric  
47 patients with perforated appendicitis. *Medicine.* 2017;96(47).  
48  
49  
50  
51 190. Shindholimath V., K., Thinakaran, T., Rao, Y., Veerappa. Laparoscopic management  
52 of appendicular mass. *J Minimal Access Surg.* 2011;7(2):136-40.  
53  
54  
55  
56 191. Shimizu T., M., Ishizuka, K., Kubota. The preoperative serum C-reactive protein level  
57 is a useful predictor of surgical site infections in patients undergoing appendectomy. *Surg*  
58 *Today.* 2015;45(11):1404-10.  
59  
60



- 1  
2  
3  
4  
5 192. Siam B., A., Al-Kurd, N., Simanovsky, H., Awesat, Y., Cohn, B., Helou, et al.  
6 Comparison of appendectomy outcomes between senior general surgeons and general  
7 surgery residents. *JAMA Surg.* 2017;152(7):679-85.  
8  
9  
10  
11  
12 193. 서승원, 김신곤. Acute Appendicitis in Pregnant Patients and Non-Pregnant Patients:  
13 Recent Clinical Experience of the Tertiary Hospital Z1 임신부와 가임기 여성의 급성  
14 충수염의 비교 고찰: 최근 3차 병원의 임상적 경험. *Annals of Surgical Treatment and*  
15 *Research S1 대한외과학회지.* 2002;62(6):486-90.  
16  
17  
18  
19  
20  
21  
22  
23  
24  
25  
26  
27  
28 194. Alfredo Silva, M, Guido Vargas, A, Amparo Moreno, H, Pablo Becerra. Utilidad del  
29 retractor elástico abdominal para disminuir el riesgo de infección de herida operatoria en  
30 apendicitis aguda X1 Use of an elasticwall retractor during appendectomy to reduce wound  
31 infection. *Revista chilena de cirugía.* 2008;60(6):527-33.  
32  
33  
34  
35  
36  
37 195. Singh V.K., K., Nishant, B., Kharga, A.K., Kalita, P., Bhutia, J., Jain. Randomized  
38 controlled trial comparing open, conventional, and single port laparoscopic appendectomy.  
39 *J Clin Diagn Res.* 2017;11(10):PC05-PC10.  
40  
41  
42  
43  
44  
45  
46 196. Siribumrungwong B., K., Srikuea, A., Thakkinstian. Comparison of superficial surgical  
47 site infection between delayed primary and primary wound closures in ruptured  
48 appendicitis. *Asian J Surg.* 2014;37(3):120-4.  
49  
50  
51  
52  
53 197. Sivrikoz E., E., Karamanos, E., Beale, P., Teixeira, K., Inaba, D., Demetriades. The  
54 effect of diabetes on outcomes following emergency appendectomy in patients without  
55 comorbidities: A propensity score-matched analysis of National Surgical Quality  
56 Improvement Program database. *Am J Surg.* 2015;209(1):206-11.  
57  
58  
59  
60

- 1  
2  
3 198. Soll C., P., Wyss, H., Gelpke, D.A., Raptis, S., Breitenstein. Appendiceal stump closure  
4 using polymeric clips reduces intra-abdominal abscesses. *Langenbeck's Arch Surg.*  
5 2016;401(5):661-6.  
6  
7  
8  
9  
10 199. Sozutek A., T., Colak, M., Dirlik, K., Ocal, O., Turkmenoglu, A., Dag. A prospective  
11 randomized comparison of single-port laparoscopic procedure with open and standard 3-  
12 port laparoscopic procedures in the treatment of acute appendicitis. *Surg Laparoscopy*  
13 *Endosc Percutaneous Tech.* 2013;23(1):74-8.  
14  
15  
16  
17  
18 200. Srishewachart P., S., Narksut. Incidence of abnormal preoperative blood testing and  
19 postoperative complication in appendectomy patients in Siriraj Hospital. *J Med Assoc*  
20 *Thailand.* 2016;99(5):517-24.  
21  
22  
23  
24  
25 201. Staszewicz W., M.-C., Eisenring, V., Bettschart, S., Harbarth, N., Troillet. Thirteen  
26 years of surgical site infection surveillance in Swiss hospitals. *J Hosp Infect.* 2014;88(1):40-  
27 7.  
28  
29  
30  
31  
32 202. Suttie S.A., S., Seth, C.P., Driver, A.A., Mahomed. Outcome after intra- and extra-  
33 corporeal laparoscopic appendectomy techniques. *Surg Endosc.* 2004;18(7):1123-5.  
34  
35  
36  
37 203. Svensson J.F., B., Patkova, M., Almström, S., Eaton, T., Wester. Outcome after  
38 introduction of laparoscopic appendectomy in children: A cohort study. *J Pediatr Surg.*  
39 2016;51(3):449-53.  
40  
41  
42  
43  
44 204. Taguchi Y., S., Komatsu, E., Sakamoto, S., Norimizu, Y., Shingu, H., Hasegawa.  
45 Laparoscopic versus open surgery for complicated appendicitis in adults: a randomized  
46 controlled trial. *Surg Endosc Interv Tech.* 2016;30(5):1705-12.  
47  
48  
49  
50  
51 205. Tanaka S., D., Kubota, S.H., Lee, K., Oba, M., Matsuyama. Effectiveness of  
52 laparoscopic approach for acute appendicitis. *Osaka City Med J.* 2007;53(1):1-8.  
53  
54  
55  
56 206. Tijerina J., R., Velasco-Rodríguez, C., Vásquez, V., Melnikov, S., Rodriguez.  
57 Effectiveness of a systemic antibiotic followed by topical ionized solution as surgical site  
58 infection prophylaxis. *J Int Med Res.* 2010;38(4):1287-93.  
59  
60

- 1  
2  
3  
4  
5 207. The SCARLESS Study Group. Single port/incision laparoscopic surgery compared with  
6 standard three-port laparoscopic surgery for appendectomy: A randomized controlled  
7 trial. *Surg Endosc Interv Tech*. 2015;29(1):77-85.  
8  
9  
10  
11 208. Juan Pablo Toro, Barrera, Óscar Javier, Morales, Carlos Hernando. Superioridad clínica  
12 de la apendicectomía laparoscópica sobre la técnica abierta: ¿adopción lenta de un nuevo  
13 estándar de tratamiento? X1 Clinical superiority of laparoscopic appendectomy over the  
14 open technique: sluggish adoption of a new standard of treatment? *Revista Colombiana de*  
15 *Cirugía*. 2017;32(1):32-9.  
16  
17  
18  
19  
20  
21  
22 209. Towfigh S., T., Clarke, W., Yacoub, A.H., Pooli, R.J., Mason, N., Katkhouda, et al.  
23 Significant reduction of wound infections with daily probing of contaminated wounds : A  
24 prospective randomized clinical trial. *Arch Surg*. 2011;146(4):448-52.  
25  
26  
27  
28  
29 210. Troillet N., E., Aghayev, M.-C., Eisenring, A.F., Widmer. First Results of the Swiss  
30 National Surgical Site Infection Surveillance Program: Who Seeks Shall Find. *Infect*  
31 *Control Hosp Epidemiol*. 2017;38(6):697-704.  
32  
33  
34  
35  
36 211. Tsioplis C., C., Brockschmidt, S., Sander, D., Henne-Bruns, M., Kornmann. Factors  
37 influencing the course of acute appendicitis in adults and children. *Langenbeck's Arch Surg*.  
38 2013;398(6):857-67.  
39  
40  
41  
42  
43 212. Vahdad M.R., M., Nissen, A., Semaan, T., Klein, E., Palade, T., Boemers, et al.  
44 Experiences with LESS-appendectomy in Children. *Arch Iran Med*. 2016;19(1):57-63.  
45  
46  
47  
48 213. Van Rossem C.C., M.H.F., Schreinemacher, A.A.W., Van Geloven, W.A., Bemelman,  
49 G.J.D., Van Acker, B., Akkermans, et al. Antibiotic duration after laparoscopic  
50 appendectomy for acute complicated appendicitis. *JAMA Surg*. 2016;151(4):323-9.  
51  
52  
53  
54  
55 214. Van Rossem C.C., M.H.F., Schreinemacher, K., Treskes, R.M., Van Hogeand,  
56 A.A.W., Van Geloven. Duration of antibiotic treatment after appendectomy for acute  
57 complicated appendicitis. *Br J Surg*. 2014;101(6):715-9.  
58  
59  
60

- 1  
2  
3 215. Wang-Chan A., F.H., Hetzer, C., Gingert, C., Gingert, E., Angst, E., Angst, et al.  
4 Clinical relevance and effect of surgical wound classification in appendicitis: Retrospective  
5 evaluation of wound classification discrepancies between surgeons, Swissnoso-trained  
6 infection control nurse, and histology as well as surgical site infection rates by wound class.  
7  
8 J Surg Res. 2017;215:132-9.  
9  
10  
11  
12  
13 216. Watanabe A., S., Kohnoe, H., Sonoda, K., Shirabe, K., Fukuzawa, S., Maekawa, et al.  
14 Effect of intra-abdominal absorbable sutures on surgical site infection. Surg Today.  
15 2012;42(1):52-9.  
16  
17  
18  
19  
20 217. Willis Z.I., E.M., Duggan, B.T., Bucher, J.B., Pietsch, M., Milovancev, W., Wharton,  
21 et al. Effect of a clinical practice guideline for pediatric complicated appendicitis. JAMA  
22 Surg. 2016;151(5).  
23  
24  
25  
26  
27 218. Ramírez-Wong F.M., T., Atencio-Espinoza, V.D., Rosenthal, E., Ramirez, S.L., Torres-  
28 Zegarra, Z.R., Díaz Tavera, et al. Surgical Site Infections Rates in More Than 13,000  
29 Surgical Procedures in Three Cities in Peru: Findings of the International Nosocomial  
30 Infection Control Consortium. Surg Infect. 2015;16(5):572-6.  
31  
32  
33  
34  
35  
36 219. Wu J.-M., K.-H., Chen, H.-F., Lin, L.-M., Tseng, S.-H., Tseng, S.-H., Huang.  
37 Laparoscopic appendectomy in pregnancy. J Laparoendosc Adv Surg Techn Part A.  
38 2005;15(5):447-50.  
39  
40  
41  
42  
43 220. Wu H.-S., H.-W., Lai, S.-J., Kuo, Y.-T., Lee, D.-R., Chen, C.-W., Chi, et al. Competitive  
44 edge of laparoscopic appendectomy versus open appendectomy: A subgroup comparison  
45 analysis. J Laparoendosc Adv Surg Techn. 2011;21(3):197-202.  
46  
47  
48  
49  
50 221. Wu K., L., Yang, A., Wu, J., Wang, S., Xu, H., Zhao, et al. Single-site laparoscopic  
51 appendectomy in children using conventional instruments: a prospective, randomized,  
52 control trial. Pediatr Surg Int. 2014;31(2):167-71.  
53  
54  
55  
56  
57 222. Wu T.-C., Q., Lu, Z.-Y., Huang, X.-H., Liang. Efficacy of emergency laparoscopic  
58 appendectomy in treating complicated appendicitis for elderly patients. Saudi Med J.  
59 2017;38(11):1108-12.  
60

- 1  
2  
3  
4  
5 223. Yaghoubian A., C., de Virgilio, V., Chiu, S.L., Lee. "July effect" and appendicitis. *J Surg Educ.* 2010;67(3):157-60.  
6  
7  
8  
9  
10 224. Yagnik V., J., Rathod, A., Phatak. A retrospective study of two-port appendectomy and  
11 its comparison with open appendectomy and three-port appendectomy. *Saudi J*  
12 *Gastroenterol.* 2010;16(4):268-71.  
13  
14  
15  
16  
17 225. Yousef Y., F., Youssef, M., Homsy, T., Dinh, K., Pandya, H., Stagg, et al.  
18 Standardization of care for pediatric perforated appendicitis improves outcomes. *J Pediatr*  
19 *Surg.* 2017;52(12):1916-20.  
20  
21  
22  
23  
24 226. Zhang Z., Y., Wang, R., Liu, L., Zhao, H., Liu, J., Zhang, et al. Suprapubic single-  
25 incision versus conventional laparoscopic appendectomy. *J Surg Res.* 2016;200(1):131-8.  
26  
27  
28  
29  
30  
31  
32  
33  
34  
35  
36  
37  
38  
39  
40  
41  
42  
43  
44  
45  
46  
47  
48  
49  
50  
51  
52  
53  
54  
55  
56  
57  
58  
59  
60

## MOOSE Checklist for Meta-analyses of Observational Studies

| Item No                                     | Recommendation                                                                                                                                                                                                                                                               | Reported on Page No                |
|---------------------------------------------|------------------------------------------------------------------------------------------------------------------------------------------------------------------------------------------------------------------------------------------------------------------------------|------------------------------------|
| Reporting of background should include      |                                                                                                                                                                                                                                                                              |                                    |
| 1                                           | Problem definition                                                                                                                                                                                                                                                           | 5                                  |
| 2                                           | Hypothesis statement                                                                                                                                                                                                                                                         | 6                                  |
| 3                                           | Description of study outcome(s)                                                                                                                                                                                                                                              | 5                                  |
| 4                                           | Type of exposure or intervention used                                                                                                                                                                                                                                        | NA                                 |
| 5                                           | Type of study designs used                                                                                                                                                                                                                                                   | 5-6                                |
| 6                                           | Study population                                                                                                                                                                                                                                                             | 5-6                                |
| Reporting of search strategy should include |                                                                                                                                                                                                                                                                              |                                    |
| 7                                           | Qualifications of searchers (eg, librarians and investigators)                                                                                                                                                                                                               | 13                                 |
| 8                                           | Search strategy, including time period included in the synthesis and key words                                                                                                                                                                                               | 6; Suppl. Table 1                  |
| 9                                           | Effort to include all available studies, including contact with authors                                                                                                                                                                                                      | 6                                  |
| 10                                          | Databases and registries searched                                                                                                                                                                                                                                            | 6                                  |
| 11                                          | Search software used, name and version, including special features used (eg, explosion)                                                                                                                                                                                      | 6                                  |
| 12                                          | Use of hand searching (eg, reference lists of obtained articles)                                                                                                                                                                                                             | 6                                  |
| 13                                          | List of citations located and those excluded, including justification                                                                                                                                                                                                        | 8, Suppl. Fig 1, Suppl. References |
| 14                                          | Method of addressing articles published in languages other than English                                                                                                                                                                                                      | 7                                  |
| 15                                          | Method of handling abstracts and unpublished studies                                                                                                                                                                                                                         | 7                                  |
| 16                                          | Description of any contact with authors                                                                                                                                                                                                                                      | 6                                  |
| Reporting of methods should include         |                                                                                                                                                                                                                                                                              |                                    |
| 17                                          | Description of relevance or appropriateness of studies assembled for assessing the hypothesis to be tested                                                                                                                                                                   | 6                                  |
| 18                                          | Rationale for the selection and coding of data (eg, sound clinical principles or convenience)                                                                                                                                                                                | 6-7                                |
| 19                                          | Documentation of how data were classified and coded (eg, multiple raters, blinding and interrater reliability)                                                                                                                                                               | 6-7                                |
| 20                                          | Assessment of confounding (eg, comparability of cases and controls in studies where appropriate)                                                                                                                                                                             | 8                                  |
| 21                                          | Assessment of study quality, including blinding of quality assessors, stratification or regression on possible predictors of study results                                                                                                                                   | 8                                  |
| 22                                          | Assessment of heterogeneity                                                                                                                                                                                                                                                  | 7                                  |
| 23                                          | Description of statistical methods (eg, complete description of fixed or random effects models, justification of whether the chosen models account for predictors of study results, dose-response models, or cumulative meta-analysis) in sufficient detail to be replicated | 7-8                                |
| 24                                          | Provision of appropriate tables and graphics                                                                                                                                                                                                                                 | Table 1; Fig 1-3                   |
| Reporting of results should include         |                                                                                                                                                                                                                                                                              |                                    |
| 25                                          | Graphic summarizing individual study estimates and overall estimate                                                                                                                                                                                                          | Fig 1-3                            |
| 26                                          | Table giving descriptive information for each study included                                                                                                                                                                                                                 | Suppl. Table 1                     |
| 27                                          | Results of sensitivity testing (eg, subgroup analysis)                                                                                                                                                                                                                       | 9; Table 1                         |

|    |                                         |                                                                                                                           |                                    |
|----|-----------------------------------------|---------------------------------------------------------------------------------------------------------------------------|------------------------------------|
| 1  | 28                                      | Indication of statistical uncertainty of findings                                                                         | 9; Table 1;<br>Fig 1-3             |
| 2  |                                         |                                                                                                                           |                                    |
| 3  |                                         |                                                                                                                           |                                    |
| 4  | <b>Item No</b>                          | <b>Recommendation</b>                                                                                                     | <b>Reported<br/>on Page<br/>No</b> |
| 5  |                                         |                                                                                                                           |                                    |
| 6  |                                         |                                                                                                                           |                                    |
| 7  | Reporting of discussion should include  |                                                                                                                           |                                    |
| 8  |                                         |                                                                                                                           |                                    |
| 9  | 29                                      | Quantitative assessment of bias (eg, publication bias)                                                                    | 12-13                              |
| 10 | 30                                      | Justification for exclusion (eg, exclusion of non-English language citations)                                             | 12-13                              |
| 11 |                                         |                                                                                                                           |                                    |
| 12 | 31                                      | Assessment of quality of included studies                                                                                 | 12-13                              |
| 13 | Reporting of conclusions should include |                                                                                                                           |                                    |
| 14 |                                         |                                                                                                                           |                                    |
| 15 | 32                                      | Consideration of alternative explanations for observed results                                                            | 13                                 |
| 16 | 33                                      | Generalization of the conclusions (ie, appropriate for the data presented and within the domain of the literature review) | 13                                 |
| 17 |                                         |                                                                                                                           |                                    |
| 18 | 34                                      | Guidelines for future research                                                                                            | 13                                 |
| 19 |                                         |                                                                                                                           |                                    |
| 20 | 35                                      | Disclosure of funding source                                                                                              | 14                                 |

21 From: Stroup DF, Berlin JA, Morton SC, et al, for the Meta-analysis Of Observational Studies in Epidemiology  
 22 (MOOSE) Group. Meta-analysis of Observational Studies in Epidemiology. A Proposal for Reporting. *JAMA*.  
 23 2000;283(15):2008-2012. doi: 10.1001/jama.283.15.2008.



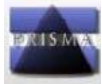

# PRISMA 2009 Checklist

| Section/topic                      | #  | Checklist item                                                                                                                                                                                                                                                                                              | Reported on page # |
|------------------------------------|----|-------------------------------------------------------------------------------------------------------------------------------------------------------------------------------------------------------------------------------------------------------------------------------------------------------------|--------------------|
| <b>TITLE</b>                       |    |                                                                                                                                                                                                                                                                                                             |                    |
| Title                              | 1  | Identify the report as a systematic review, meta-analysis, or both.                                                                                                                                                                                                                                         | 1                  |
| <b>ABSTRACT</b>                    |    |                                                                                                                                                                                                                                                                                                             |                    |
| Structured summary                 | 2  | Provide a structured summary including, as applicable: background; objectives; data sources; study eligibility criteria, participants, and interventions; study appraisal and synthesis methods; results; limitations; conclusions and implications of key findings; systematic review registration number. | 2-3                |
| <b>INTRODUCTION</b>                |    |                                                                                                                                                                                                                                                                                                             |                    |
| Rationale                          | 3  | Describe the rationale for the review in the context of what is already known.                                                                                                                                                                                                                              | 5-6                |
| Objectives                         | 4  | Provide an explicit statement of questions being addressed with reference to participants, interventions, comparisons, outcomes, and study design (PICOS).                                                                                                                                                  | 6                  |
| <b>METHODS</b>                     |    |                                                                                                                                                                                                                                                                                                             |                    |
| Protocol and registration          | 5  | Indicate if a review protocol exists, if and where it can be accessed (e.g., Web address), and, if available, provide registration information including registration number.                                                                                                                               | 8                  |
| Eligibility criteria               | 6  | Specify study characteristics (e.g., PICOS, length of follow-up) and report characteristics (e.g., years considered, language, publication status) used as criteria for eligibility, giving rationale.                                                                                                      | 6                  |
| Information sources                | 7  | Describe all information sources (e.g., databases with dates of coverage, contact with study authors to identify additional studies) in the search and date last searched.                                                                                                                                  | 6                  |
| Search                             | 8  | Present full electronic search strategy for at least one database, including any limits used, such that it could be repeated.                                                                                                                                                                               | 6                  |
| Study selection                    | 9  | State the process for selecting studies (i.e., screening, eligibility, included in systematic review, and, if applicable, included in the meta-analysis).                                                                                                                                                   | 7                  |
| Data collection process            | 10 | Describe method of data extraction from reports (e.g., piloted forms, independently, in duplicate) and any processes for obtaining and confirming data from investigators.                                                                                                                                  | 7                  |
| Data items                         | 11 | List and define all variables for which data were sought (e.g., PICOS, funding sources) and any assumptions and simplifications made.                                                                                                                                                                       | 7                  |
| Risk of bias in individual studies | 12 | Describe methods used for assessing risk of bias of individual studies (including specification of whether this was done at the study or outcome level), and how this information is to be used in any data synthesis.                                                                                      | 8                  |
| Summary measures                   | 13 | State the principal summary measures (e.g., risk ratio, difference in means).                                                                                                                                                                                                                               | 7-8                |
| Synthesis of results               | 14 | Describe the methods of handling data and combining results of studies, if done, including measures of consistency (e.g., $I^2$ ) for each meta-analysis.                                                                                                                                                   | 7-8                |

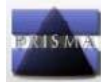

# PRISMA 2009 Checklist

| Section/topic                 | #  | Checklist item                                                                                                                                                                                           | Reported on page # |
|-------------------------------|----|----------------------------------------------------------------------------------------------------------------------------------------------------------------------------------------------------------|--------------------|
| Risk of bias across studies   | 15 | Specify any assessment of risk of bias that may affect the cumulative evidence (e.g., publication bias, selective reporting within studies).                                                             | 7-8                |
| Additional analyses           | 16 | Describe methods of additional analyses (e.g., sensitivity or subgroup analyses, meta-regression), if done, indicating which were pre-specified.                                                         | 8                  |
| <b>RESULTS</b>                |    |                                                                                                                                                                                                          |                    |
| Study selection               | 17 | Give numbers of studies screened, assessed for eligibility, and included in the review, with reasons for exclusions at each stage, ideally with a flow diagram.                                          | 8                  |
| Study characteristics         | 18 | For each study, present characteristics for which data were extracted (e.g., study size, PICOS, follow-up period) and provide the citations.                                                             | 8                  |
| Risk of bias within studies   | 19 | Present data on risk of bias of each study and, if available, any outcome level assessment (see item 12).                                                                                                | 8                  |
| Results of individual studies | 20 | For all outcomes considered (benefits or harms), present, for each study: (a) simple summary data for each intervention group (b) effect estimates and confidence intervals, ideally with a forest plot. | 8-9                |
| Synthesis of results          | 21 | Present results of each meta-analysis done, including confidence intervals and measures of consistency.                                                                                                  | 8-9                |
| Risk of bias across studies   | 22 | Present results of any assessment of risk of bias across studies (see Item 15).                                                                                                                          | 8-9                |
| Additional analysis           | 23 | Give results of additional analyses, if done (e.g., sensitivity or subgroup analyses, meta-regression [see Item 16]).                                                                                    | 9                  |
| <b>DISCUSSION</b>             |    |                                                                                                                                                                                                          |                    |
| Summary of evidence           | 24 | Summarize the main findings including the strength of evidence for each main outcome; consider their relevance to key groups (e.g., healthcare providers, users, and policy makers).                     | 10                 |
| Limitations                   | 25 | Discuss limitations at study and outcome level (e.g., risk of bias), and at review-level (e.g., incomplete retrieval of identified research, reporting bias).                                            | 12                 |
| Conclusions                   | 26 | Provide a general interpretation of the results in the context of other evidence, and implications for future research.                                                                                  | 12                 |
| <b>FUNDING</b>                |    |                                                                                                                                                                                                          |                    |
| Funding                       | 27 | Describe sources of funding for the systematic review and other support (e.g., supply of data); role of funders for the systematic review.                                                               | 14                 |

From: Moher D, Liberati A, Tetzlaff J, Altman DG, The PRISMA Group (2009). Preferred Reporting Items for Systematic Reviews and Meta-Analyses: The PRISMA Statement. PLoS Med 6(7): e1000097. doi:10.1371/journal.pmed1000097

For more information, visit: [www.prisma-statement.org](http://www.prisma-statement.org).
