# Supplementary material for: Global incidence of surgical site infection after appendectomy: a systematic review and meta-analysis
Source: PubMed Central journal article supplement — BMJ Open. 2020 Feb 18;10(2):e034266. doi: 10.1136/bmjopen-2019-034266 (PMC7045165; doi:10.1136/bmjopen-2019-034266), 2020-02-18
Supplement: bmjopen-2019-034266supp001.pdf [file bmjopen-2019-034266supp001.pdf]

## Global incidence of surgical-site infection after appendectomy: a systematic review and meta-analysis

BMJ OPEN

### APPENDIX

---

Celestin **Danwang**, Jean Joel **Bigna**, Joel Noutakdie **Tochie**,  
Aime **Mbonda**, Clarence Mvalo **Mbanga**, Rolf Nyah Tuku **Nzalie**,  
Marc Leroy **Guifo**, Arthur **Essomba**

|                                                                                                                         |    |
|-------------------------------------------------------------------------------------------------------------------------|----|
| Supplementary Figure 1. Study flow .....                                                                                | 2  |
| Supplementary Figure 2. Funnel plot for publication bias .....                                                          | 3  |
| Supplementary Figure 3. Global Incidence of surgical site infection after appendectomy, by country level of income..... | 4  |
| Supplementary Figure 4. Global Incidence of surgical site infection after appendectomy, by WHO regions.....             | 5  |
| Supplementary Figure 5. Global Incidence of surgical site infection after appendectomy, by surgical procedure .....     | 6  |
| <br>                                                                                                                    |    |
| Supplementary Table 1. Search strategy in EMBASE.....                                                                   | 7  |
| Supplementary Table 2 : Characteristics of included studies .....                                                       | 8  |
| Supplementary Table 3. Individual characteristics of included studies.....                                              | 10 |
| <br>                                                                                                                    |    |
| Reference list of included studies.....                                                                                 | 26 |

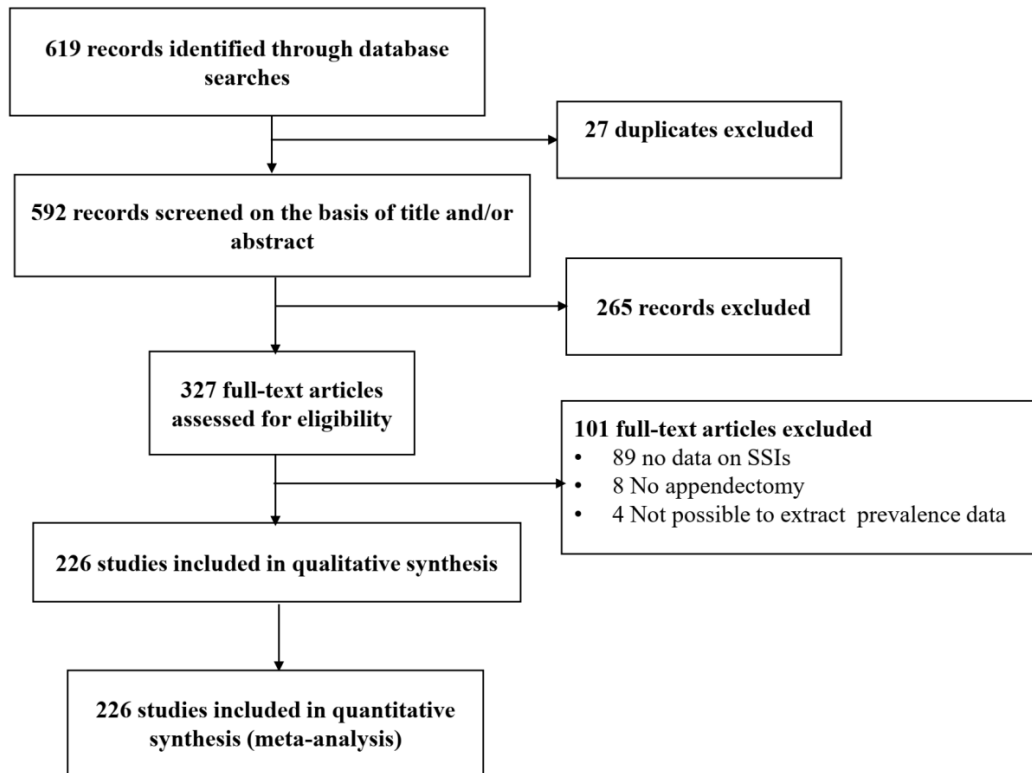

Supplementary Figure 1. Study flow

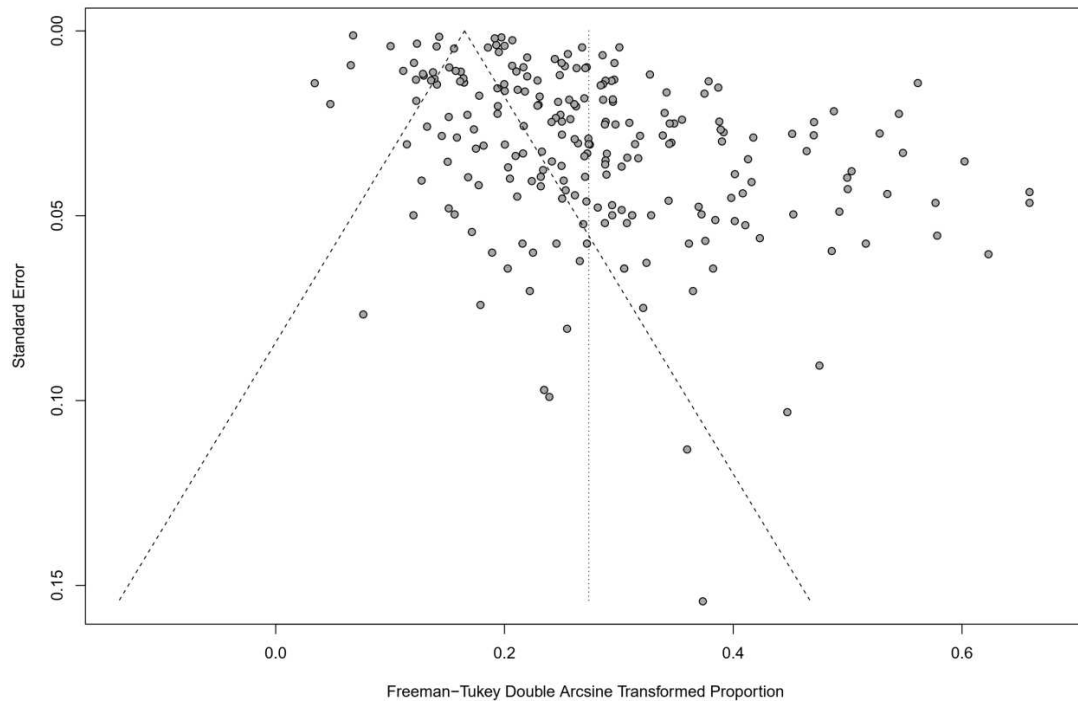

Supplementary Figure 2. Funnel plot for publication bias

Supplementary Figure 3. Global Incidence of surgical site infection after appendectomy, by country level of income

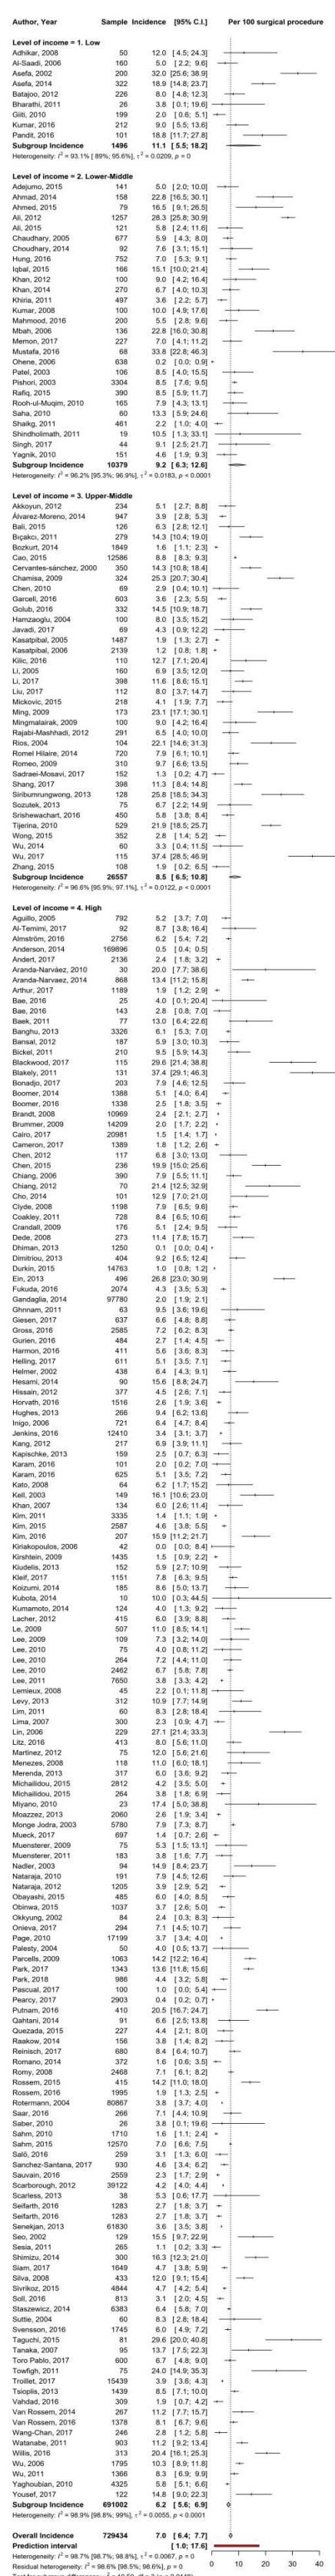

Supplementary Figure 4. Global Incidence of surgical site infection after appendectomy, by WHO regions

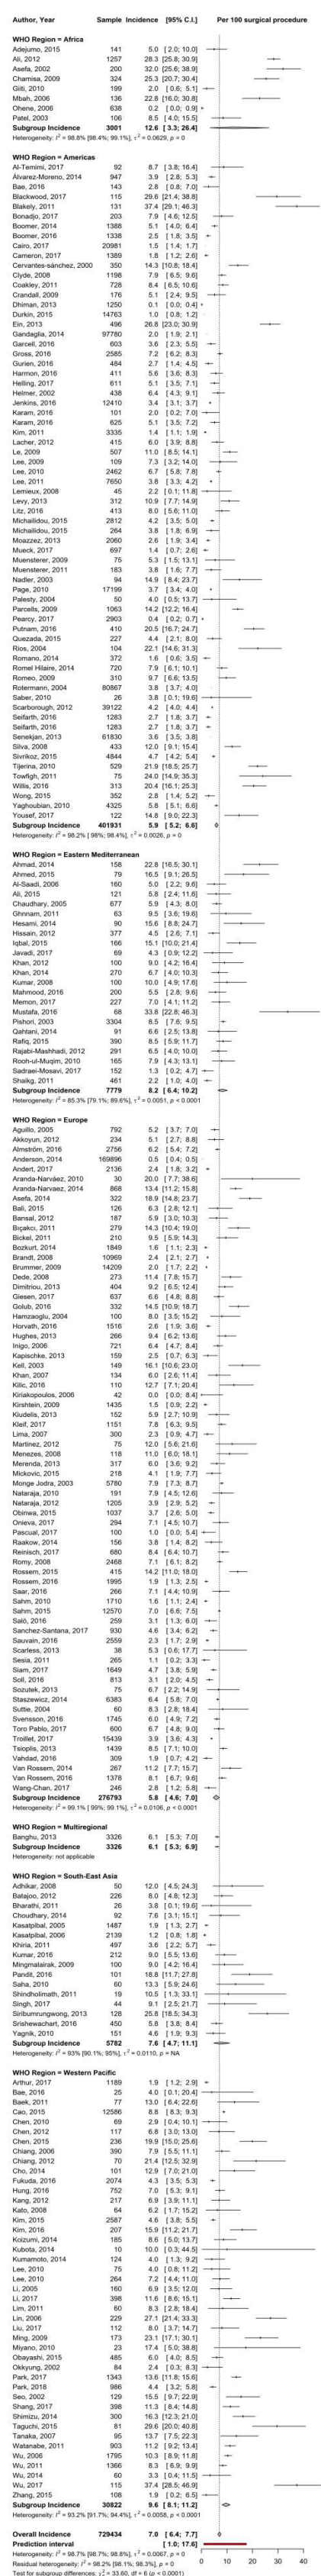



Supplementary Figure 5. Global Incidence of surgical site infection after appendectomy, by surgical procedure

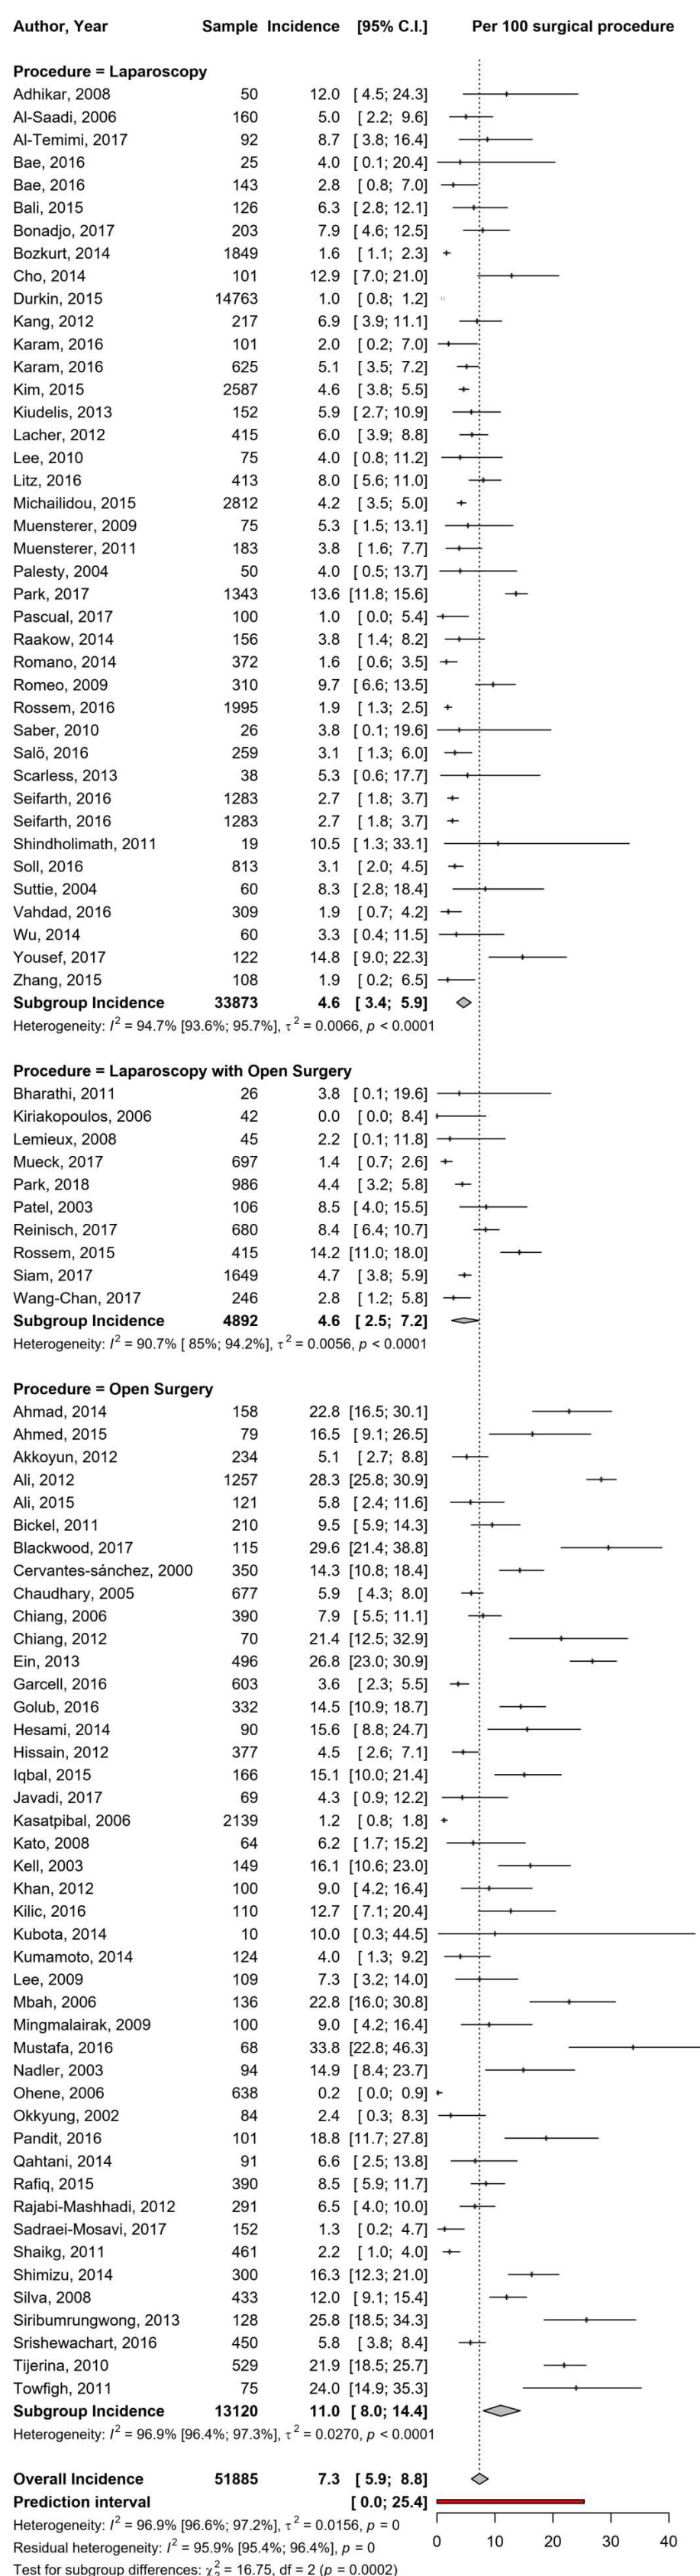

Supplementary Table 1. Search strategy in EMBASE

|           | <b>Search terms</b>                                                                                                                                                                                                                                                                                                                                                                                             |
|-----------|-----------------------------------------------------------------------------------------------------------------------------------------------------------------------------------------------------------------------------------------------------------------------------------------------------------------------------------------------------------------------------------------------------------------|
| <b>#1</b> | 'appendectomy'/exp OR appendectomy OR 'appendicectomy'/exp OR appendicectomy OR appendices OR 'appendix epiploica' OR 'omental appendix' OR 'appendicitis'/exp OR appendicitis                                                                                                                                                                                                                                  |
| <b>#2</b> | 'surgical site infection'/exp OR 'surgical site infection' OR 'surgical wound infection'/exp OR 'surgical wound infection' OR 'surgical wound infections'/exp OR 'surgical wound infections' OR 'surgical site infections' OR 'operative site infections' OR 'postoperative wound infections'/exp OR 'postoperative wound infections' OR 'postoperative wound infection'/exp OR 'postoperative wound infection' |
| <b>#3</b> | [2000-2018]/py                                                                                                                                                                                                                                                                                                                                                                                                  |
| <b>#4</b> | #1 AND #2 AND #3                                                                                                                                                                                                                                                                                                                                                                                                |

Supplementary Table 2 : Characteristics of included studies

| Characteristics                | N = 226            |
|--------------------------------|--------------------|
| Year of publication, range     | 2000-2018          |
| %Male, range                   | 0-100 (n = 195)    |
| Mean/median age, range         | 7-74 (n = 186)     |
| %HIV                           | 0-13.1 (n = 2)     |
| %Diabetes                      | 0-95.7 (n = 34)    |
| %Obesity                       | 0-7.4 (n = 18)     |
| Design, n                      |                    |
| - Cross sectional              | 120                |
| - Cohort study                 | 99                 |
| - Case control                 | 7                  |
| WHO regions, n                 |                    |
| - Africa                       | 8                  |
| - Americas                     | 67                 |
| - Eastern Mediterranean        | 23                 |
| - Europe                       | 68                 |
| - Multiregional                | 1                  |
| - South-East Asia              | 16                 |
| - Western Pacific              | 43                 |
| Level of income, n             |                    |
| - Low                          | 9                  |
| - Lower-middle                 | 27                 |
| - Upper-middle                 | 36                 |
| - High                         | 154                |
| Timing of data collection      |                    |
| - Retrospective                | 123                |
| - Prospective                  | 101                |
| - Unclear                      | 2                  |
| Sampling                       |                    |
| - Consecutive                  | 131                |
| - Systematic                   | 37                 |
| - Random                       | 32                 |
| - Exhaustive                   | 11                 |
| - Unclear                      | 15                 |
| Number of sites                |                    |
| - Multisite                    | 51                 |
| - One site                     | 170                |
| - Unclear                      | 5                  |
| Pattern of appendicitis, range |                    |
| - %Catarrhal                   | 0-100 (n = 84)     |
| - %Perforated                  | 0-100 (n = 110)    |
| - %Suppurated                  | 0-100 (n = 70)     |
| - %Gangrenous                  | 0-46.7 (n = 89)    |
| %With administered antibiotics | 24.1-100 (n = 109) |
| %With administered analgesics  | 64.5-100 (n = 20)  |
| %With diet > 6 or 8 hours      | 50-100 (n = 3)     |
| Type of surgery                |                    |
| - %Open surgery                | 0-100 (n = 134)    |



|                                                                 |                   |
|-----------------------------------------------------------------|-------------------|
| - %Laparoscopy                                                  | 0-100 (n = 187)   |
| Mean/median time to complete the intervention (in hours), range | 0.1-2.2 (n = 106) |
| Type of anesthesia, n                                           |                   |
| - General                                                       | 118               |
| - Spinal and general                                            | 2                 |
| - Unclear                                                       | 106               |
| SSI definition, n                                               |                   |
| - CDC-NNIS criteria                                             | 50                |
| - Other criteria                                                | 25                |
| - Not reported/Unclear                                          | 151               |

---

Supplementary Table 3. Individual characteristics of included studies

| Author         | Year | Risk of bias | Design          | Country  | Timing               | Sampling method | Sites     | Period    | Population                             | %Male | Mean or median age | %Obesity | Pattern of appendicitis                               | %Catarrhal | %Perforated | %Suppurated | %Gangrenous | % with antibiotic therapy | Type of surgery             | Time to complete the surgery intervention (in hours) | Type of anesthesia | SSI Definition                            | Sample |
|----------------|------|--------------|-----------------|----------|----------------------|-----------------|-----------|-----------|----------------------------------------|-------|--------------------|----------|-------------------------------------------------------|------------|-------------|-------------|-------------|---------------------------|-----------------------------|------------------------------------------------------|--------------------|-------------------------------------------|--------|
| Adejumo        | 2015 | Moderate     | Cohort          | Nigeria  | Retrospective        | Consecutive     | One site  | 2007-2014 | Adults                                 | 39    | 26                 | NR       | Catarrhal, Perforated, Suppurated, Gangrenous         | 48.9       | NR          | NR          | NR          | 100                       | NR                          | NR                                                   | NR                 | NR                                        | 141    |
| Adhikar        | 2008 | Moderate     | Cohort          | Nepal    | Prospective          | Consecutive     | One site  | 2005-2006 | Children, Adolescents, Adults, Elderly | NR    | NR                 | NR       | Unclear                                               | NR         | NR          | NR          | NR          | 100                       | Laparoscopy                 | 0.5                                                  | General            | NR                                        | 50     |
| Aguillo        | 2005 | Moderate     | Cohort          | Spain    | Prospective          | Consecutive     | Unclear   | NR        | Children, Adolescents, Adults, Elderly | 63.1  | NR                 | NR       | Unclear                                               | NR         | NR          | NR          | NR          | 100                       | NR                          | NR                                                   | NR                 | NR                                        | 792    |
| Ahmad          | 2014 | Moderate     | Clinical trial  | Pakistan | Prospective          | Consecutive     | One site  | 2012      | Adults                                 | 35.4  | 27.4               | NR       | Perforated                                            | 0          | 100         | 0           | 0           | 100                       | Open Surgery                | NR                                                   | General            | NR                                        | 158    |
| Ahmed          | 2015 | Moderate     | Cross sectional | Pakistan | Retrospective        | Consecutive     | One site  | 2009-2010 | Children, Adolescents                  | 51.89 | 10.1               | NR       | Unclear                                               | NR         | NR          | NR          | NR          | 100                       | Open Surgery                | NR                                                   | NR                 | NR                                        | 79     |
| Akkoyun        | 2012 | Moderate     | Case control    | Turkey   | Retrospective        | Consecutive     | One site  | 1998-2011 | Children                               | 64.5  | 8.9                | NR       | Perforated                                            | 0          | 100         | 0           | 0           | 100                       | Open Surgery                | 0.6                                                  | General            | NR                                        | 234    |
| Ali            | 2015 | Moderate     | Cross sectional | Pakistan | Prospective          | Consecutive     | One site  | 2014      | Adults                                 | 46.3  | 27.4               | NR       | Unclear                                               | NR         | NR          | NR          | NR          | 100                       | Open Surgery                | NR                                                   | General            | NR                                        | 121    |
| Ali            | 2012 | Moderate     | Cohort          | Nigeria  | Prospective          | Consecutive     | One site  | 2002-2009 | Children, Adolescents, Adults, Elderly | 33.9  | 32                 | NR       | Catarrhal, Perforated, Suppurated, Gangrenous         | NR         | 23.47       | NR          | NR          |                           | Open Surgery                | NR                                                   | NR                 | NR                                        | 1257   |
| Almström       | 2016 | Moderate     | Cohort          | Sweden   | Retrospective        | Systematic      | One site  | 2006-2013 | Children, Adolescents                  | 59.5  | NR                 | NR       | Perforated, Non Perforated 76%                        | NR         | 24          | NR          | NR          |                           | Laparoscopy or Open Surgery | 0.8                                                  | NR                 | NR                                        | 2756   |
| Al-Saadi       | 2006 | Moderate     | Cohort          | Yemen    | Retrospective        | Consecutive     | One site  | 2003-2005 | Children, Adolescents, Adults          | 75    | NR                 | NR       | Catarrhal, Perforated, Suppurated, Gangrenous         | NR         | 60          | NR          | 13          | 100                       | Laparoscopy                 | NR                                                   | NR                 | NR                                        | 160    |
| Al-Temimi      | 2017 | Low          | Cohort          | USA      | Prospective          | Systematic      | One site  | 2016      | Children, Adolescents, Adults, Elderly | 40.2  | 30                 | NR       | Catarrhal, Perforated, Suppurated, Gangrenous, Normal | 73         | 17.4        | 3.3         | 3.3         |                           | Laparoscopy                 | 0.6                                                  | NR                 | NR                                        | 92     |
| Álvarez-Moreno | 2014 | Low          | Cohort          | Colombia | Prospective          | Systematic      | Multisite | 2008-2010 | Children, Adolescents, Adults, Elderly | NR    | NR                 | NR       | Unclear                                               | NR         | NR          | NR          | NR          |                           | NR                          | NR                                                   | NR                 | According to CDC-NNIS diagnostic criteria | 947    |
| Anderson       | 2014 | Moderate     | Cohort          | Sweden   | Retrospective        | Exhaustive      | Multisite | 1992-2008 | Adults                                 | 54    | NR                 | NR       | Perforated, Not perforated                            | NR         | 19.4        | 0           | 0           |                           | Laparoscopy or Open Surgery | NR                                                   | NR                 | NR                                        | 169896 |
| Andert         | 2017 | Moderate     | Cohort          | Germany  | Retrospective        | Consecutive     | One site  | 2003-2014 | Adults                                 | 48.6  | 30.5               | NR       | Catarrhal, Perforated, Suppurated, Gangrenous         | NR         | NR          | NR          | NR          | 100                       | Laparoscopy or Open Surgery | NR                                                   | NR                 | Local signs of inflammation               | 2136   |
| Aranda-Narvaez | 2014 | Moderate     | Cohort          | Spain    | Not reported/Unclear | Not clear       | One site  | 2007-2010 | Adults                                 | 57    | 29                 | NR       | Catarrhal, Perforated, Suppurated, Gangrenous         | 65.8       | NR          | NR          | NR          | 62.00                     | Laparoscopy or Open Surgery | 0.92                                                 | NR                 | According to CDC-NNIS diagnostic Criteria | 868    |
| Aranda-Narváez | 2010 | Low          | Cohort          | Spain    | Retrospective        | Random          | One site  | 1997-2009 | Children, Adolescents, Adults, Elderly | 63.3  | 35                 | NR       | Suppurated, Gangrenous                                | 0          | 0           | 53.3        | 46.7        | 100                       | Laparoscopy or Open Surgery | NR                                                   | General            | According to CDC-NNIS diagnostic Criteria | 30     |

| Author    | Year | Risk of bias | Design          | Country                                             | Timing        | Sampling method | Sites     | Period    | Population                             | % Male | Mean or median age | % Obesity | Pattern of appendicitis                               | % Catarrhal | % Perforated | % Suppurated | % Gangrenous | % with antibiotic therapy | Type of surgery               | Time to complete the surgery intervention (in hours) | Type of anesthesia | SSI Definition                            | Sample |
|-----------|------|--------------|-----------------|-----------------------------------------------------|---------------|-----------------|-----------|-----------|----------------------------------------|--------|--------------------|-----------|-------------------------------------------------------|-------------|--------------|--------------|--------------|---------------------------|-------------------------------|------------------------------------------------------|--------------------|-------------------------------------------|--------|
| Arthur    | 2017 | Low          | Cross sectional | Australia                                           | Prospective   | Systematic      | Multisite | 2016      | Children, Adolescents, Adults, Elderly | 49.5   | 31.4               | NR        | Unclear                                               | NR          | NR           | NR           | NR           |                           | Laparoscopy or Open Surgery   | 1                                                    | NR                 | NR                                        | 1189   |
| Asefa     | 2014 | Moderate     | Cross sectional | Ethiopia                                            | Retrospective | Consecutive     | One site  | 2006-2010 | Children                               | 62.1   | 10                 | NR        | Catarrhal, Perforated, Suppurated, Gangrenous         | 32.3        | 59.6         | 6.2          | 1.9          |                           | NR                            | NR                                                   | NR                 | NR                                        | 322    |
| Asefa     | 2002 | High         | Cross sectional | Ethiopia                                            | Retrospective | Consecutive     | One site  | 1997-1999 | Adults                                 | 79.5   | 25.6               | NR        | Catarrhal, Perforated                                 | 45.4        | 44           | 0            | 0            |                           | NR                            | NR                                                   | NR                 | NR                                        | 200    |
| Bae       | 2016 | Low          | Cross sectional | Korea                                               | Prospective   | Systematic      | One site  | 2014-2016 | Adults                                 | 52     | 62                 | NR        | Perforated, Suppurated, Gangrenous                    | NR          | 4            | 72           | 24           | 100                       | Laparoscopy                   | 1.2                                                  | General            | According to CDC-NNIS diagnostic criteria | 25     |
| Bae       | 2016 | Moderate     | Cross sectional | USA                                                 | Retrospective | Systematic      | One site  | 2010-2013 | Children, Adolescents, Adults          | NR     | 32                 | NR        | Unclear                                               | NR          | NR           | NR           | NR           | 36.4                      | Laparoscopy                   | NR                                                   | NR                 | According to CDC-NNIS diagnostic criteria | 143    |
| Baek      | 2011 | Moderate     | Cross sectional | Korea                                               | Retrospective | Exhaustive      | One site  | 2007-2009 | Elderly                                | 45.5   | 68.2               | NR        | Catarrhal, Perforated, Suppurated, Gangrenous         | 22.1        | 29.9         | 32.5         | 15.6         | 100                       | Laparoscopy or Open Surgery   | 1.05                                                 | General            | NR                                        | 77     |
| Bali      | 2015 | Moderate     | Cohort          | Turkey                                              | Prospective   | Consecutive     | One site  | 2009-2013 | Adults                                 | 35.7   | 32.33              | NR        | Unclear                                               | NR          | NR           | NR           | NR           |                           | Laparoscopy                   | 1                                                    | NR                 | NR                                        | 126    |
| Banghu    | 2013 | Low          | Cohort          | UK, Spain, Japan, Hong Kong, Australia, New Zealand | Prospective   | Consecutive     | Multisite | 2012      | Children, Adolescents, Adults, Elderly | 51.1   | NR                 | NR        | Unclear                                               | NR          | NR           | NR           | NR           | 96.9                      | Laparoscopy or Open Surgery   | NR                                                   | NR                 | According to CDC-NNIS diagnostic criteria | 3326   |
| Bansal    | 2012 | Low          | Cohort          | Switzerland                                         | Prospective   | Consecutive     | One site  | NR        | Children                               | 62     | 9.8                | NR        | Catarrhal, Perforated                                 | 74.3        | 25.7         | NR           | NR           | 49.2                      | Laparoscopy or Open Surgery   | 1.0                                                  | NR                 | According to CDC-NNIS diagnostic Criteria | 187    |
| Batajoo   | 2012 | Moderate     | Cross sectional | Nepal                                               | Retrospective | Consecutive     | One site  | 2009-2012 | Children, Adolescents, Adults, Elderly | 45.6   | 29.6               | NR        | Unclear                                               | NR          | NR           | NR           | NR           | 100                       | Laparoscopy or Open Surgery   | 0.8                                                  | NR                 | NR                                        | 226    |
| Bharathi  | 2011 | Moderate     | Cohort          | Nepal                                               | Prospective   | Consecutive     | One site  | 2008-2009 | Children, Adolescents, Adults, Elderly | 50     | 22.9               | NR        | Catarrhal, Perforated, Suppurated, Gangrenous         | 80          | NR           | NR           | NR           | 100                       | Laparoscopy with Open Surgery | 0.5                                                  | NR                 | NR                                        | 26     |
| Bıçakcı   | 2011 | High         | Cross sectional | Turkey                                              | Retrospective | Systematic      | Unclear   | 2006-2009 | Children, Adolescents                  | 64.5   | 10                 | NR        | Unclear                                               | NR          | NR           | NR           | NR           |                           | Laparoscopy or Open Surgery   | NR                                                   | NR                 | NR                                        | 279    |
| Bickel    | 2011 | Moderate     | Clinical trial  | Israel                                              | Prospective   | Random          | One site  | 2006-2009 | Adults                                 | 73     | 28                 | NR        | Catarrhal, Gangrenous, Phlegmonous 58.6 , Normal 4.3% | 17          | NR           | NR           | 20.5         | 100                       | Open Surgery                  | 0.5                                                  | General            | NR                                        | 210    |
| Blackwood | 2017 | Moderate     | Cross sectional | USA                                                 | Retrospective | Random          | One site  | 2010-2015 | Children                               | 55.6   | 10.4               | 29.6      | Unclear                                               | NR          | NR           | NR           | NR           |                           | Open Surgery                  | 2                                                    | General            | According to CDC-NNIS diagnostic Criteria | 115    |
| Blakely   | 2011 | Low          | Clinical trial  | USA                                                 | Prospective   | Random          | One site  | 2006-2009 | Children, Adolescents                  | 55.7   | 10.2               | NR        | Perforated                                            | 0           | 100          | 0            | 0            | 100                       | Laparoscopy or Open Surgery   | 1.9                                                  | NR                 | NR                                        | 131    |

| Author            | Year | Risk of bias | Design          | Country      | Timing        | Sampling method | Sites     | Period    | Population                             | % Male | Mean or median age | % Obesity | Pattern of appendicitis                   | % Catarrhal | % Perforated | % Suppurated | % Gangrenous | % with antibiotic therapy | Type of surgery             | Time to complete the surgery intervention (in hours) | Type of anesthesia | SSI Definition                                                 | Sample |
|-------------------|------|--------------|-----------------|--------------|---------------|-----------------|-----------|-----------|----------------------------------------|--------|--------------------|-----------|-------------------------------------------|-------------|--------------|--------------|--------------|---------------------------|-----------------------------|------------------------------------------------------|--------------------|----------------------------------------------------------------|--------|
| Bonadjo           | 2017 | Moderate     | Cross sectional | USA          | Retrospective | Consecutive     | One site  | 2008-2015 | Children, Adolescents                  | 56.2   | 8.4                | NR        | Perforated                                | 0           | 100          | 0            | 0            | 100                       | Laparoscopy                 | NR                                                   | General            | NR                                                             | 203    |
| Boomer            | 2016 | Low          | Cross sectional | USA          | Retrospective | Systematic      | Multisite | 2010-2012 | Children, Adolescents                  | 60.3   | 11.0               | NR        | Unclear                                   | NR          | NR           | NR           | NR           |                           | Laparoscopy or Open Surgery | NR                                                   | NR                 | According to CDC-NNIS diagnostic criteria                      | 1338   |
| Boomer            | 2014 | Low          | Cohort          | USA          | Retrospective | Consecutive     | One site  | 2010-2012 | Children, Adolescents                  | 61.1   | 10.9               | NR        | Catarrhal, Perforated, Gangrenous         | 66.2        | NR           | NR           | NR           | 97.8                      | Laparoscopy or Open Surgery | NR                                                   | General            | Wound infection or abdominal/pelvic abscess                    | 1388   |
| Bozkurt           | 2014 | Moderate     | Case control    | Turkey       | Retrospective | Consecutive     | One site  | 2008-2012 | Children, Adolescents, Adults, Elderly | 54     | 30.4               | NR        | Catarrhal                                 | 100         | 0            | 0            | 0            |                           | Laparoscopy                 | 0.8                                                  | General            | NR                                                             | 1849   |
| Brandt            | 2008 | Moderate     | Cross sectional | Germany      | Retrospective | Systematic      | Multisite | 2000-2004 | Children, Adolescents, Adults, Elderly | NR     | NR                 | NR        | NR                                        | NR          | NR           | NR           | NR           |                           | NR                          | NR                                                   | NR                 | According to CDC-NNIS diagnostic criteria                      | 10969  |
| Brummer           | 2009 | Moderate     | Cohort          | Germany      | Retrospective | Consecutive     | Multisite | 2004-2007 | Children, Adolescents, Adults, Elderly | NR     | NR                 | NR        | Unclear                                   | NR          | NR           | NR           | NR           |                           | Laparoscopy or Open Surgery | NR                                                   | NR                 | According to CDC-NNIS diagnostic Criteria                      | 14209  |
| Cairo             | 2017 | Moderate     | Cohort          | USA          | Retrospective | Consecutive     | Multisite | 2012-2015 | Children, Adolescents                  | 61.3   | 11.0               | 29.9      | Unclear                                   | NR          | NR           | NR           | NR           |                           | Laparoscopy or Open Surgery | NR                                                   | General            | NR                                                             | 20981  |
| Cameron           | 2017 | Low          | Cohort          | USA          | Retrospective | Systematic      | Multisite | 2012-2015 | Children, Adolescents                  | 60.4   | 11                 | 11.7      | Unclear                                   | NR          | NR           | NR           | NR           | 100                       | Laparoscopy or Open Surgery | NR                                                   | NR                 | According to CDC-NNIS diagnostic criteria                      | 1389   |
| Cao               | 2015 | Moderate     | Cohort          | China        | Retrospective | Consecutive     | Multisite | 2011-2013 | Adults                                 | 54.2   | 37.3               | 12.4      | Unclear                                   | NR          | NR           | NR           | NR           |                           | Laparoscopy or Open Surgery | 0.8                                                  | General            | NR                                                             | 12586  |
| Cervantes-sánchez | 2000 | Low          | Clinical trial  | Mexico       | Prospective   | Random          | One site  | 1994-1995 | Children, Adults                       | 53.4   | 28                 | NR        | Unclear                                   | NR          | NR           | NR           | NR           |                           | Open Surgery                | NR                                                   | General            | Pus or a positive bacteriologic culture from a wound discharge | 350    |
| Chamisa           | 2009 | High         | Cross sectional | South Africa | Retrospective | Exhaustive      | One site  | 2002-2004 | Children, Adolescents, Adults, Elderly | 78.4   | NR                 | NR        | Catarrhal, Perforated, Gangrenous, Normal | 53          | 30.5         | NR           | 10.2         |                           | Laparoscopy or Open Surgery | NR                                                   | NR                 | NR                                                             | 324    |
| Chaudhary         | 2005 | Moderate     | Clinical trial  | Pakistan     | Prospective   | Random          | One site  | 1999-2003 | Children, Adolescents, Adults, Elderly | 45.4   | NR                 | NR        | Catarrhal                                 | NR          | 0            | 0            | 0            |                           | Open Surgery                | NR                                                   | NR                 | NR                                                             | 677    |
| Chen              | 2015 | Moderate     | Cohort          | Taiwan       | Retrospective | Consecutive     | One site  | 2010-2012 | Adults                                 | 43.6   | 42.5               | NR        | Catarrhal, Perforated                     | 87.3        | 12.7         | 0            | 0            |                           | Laparoscopy or Open Surgery | NR                                                   | NR                 | NR                                                             | 236    |
| Chen              | 2012 | High         | Cross sectional | Taiwan       | Prospective   | Consecutive     | One site  | 2010      | Adults                                 | 60     | 38                 | NR        | Unclear                                   | NR          | NR           | NR           | NR           | 73                        | Laparoscopy or Open Surgery | NR                                                   | General            | NR                                                             | 117    |
| Chen              | 2010 | High         | Cross sectional | China        | Prospective   | Systematic      | One site  | 2008-2009 | Adults                                 | NR     | NR                 | NR        | Unclear                                   | NR          | NR           | NR           | NR           |                           | Laparoscopy or Open Surgery | 0.8                                                  | Spinal and General | NR                                                             | 69     |
| Chiang            | 2006 | Moderate     | Cross sectional | Taiwan       | Retrospective | Exhaustive      | One site  | 2002-2004 | Adults                                 | 59.7   | 35                 | NR        | Catarrhal, Perforated                     | 68          | 17           | 0            | 0            | 100                       | Open Surgery                | 1.1                                                  | General            | NR                                                             | 390    |

| Author    | Year | Risk of bias | Design          | Country | Timing        | Sampling method | Sites     | Period    | Population                             | %Male | Mean or median age | %Obesity | Pattern of appendicitis                       | %Catarrhal | %Perforated | %Suppurated | %Gangrenous | % with antibiotic therapy | Type of surgery             | Time to complete the surgery intervention (in hours) | Type of anesthesia | SSI Definition                                                                                                                                                                                                                                  | Sample |
|-----------|------|--------------|-----------------|---------|---------------|-----------------|-----------|-----------|----------------------------------------|-------|--------------------|----------|-----------------------------------------------|------------|-------------|-------------|-------------|---------------------------|-----------------------------|------------------------------------------------------|--------------------|-------------------------------------------------------------------------------------------------------------------------------------------------------------------------------------------------------------------------------------------------|--------|
| Chiang    | 2012 | Moderate     | Cohort          | Taiwan  | Prospective   | Consecutive     | One site  | 2008-2009 | Adults                                 | 58.6  | 37.8               | 10       | Unclear                                       | NR         | NR          | NR          | NR          | 100                       | Open Surgery                | NR                                                   | General            | Presence of gross or purulent discharge at the incision site with or without a positive bacterial culture                                                                                                                                       | 70     |
| Cho       | 2014 | Low          | Cross sectional | Korea   | Prospective   | Consecutive     | One site  | 2011-2012 | Adults                                 | 53    | 38.7               | 18.8     | Unclear                                       | NR         | NR          | NR          | NR          |                           | Laparoscopy                 | NR                                                   | General            | According to CDC-NNIS diagnostic Criteria                                                                                                                                                                                                       | 101    |
| Choudhary | 2014 | Moderate     | Cross sectional | India   | Prospective   | Random          | One site  | 2010-2013 | Adults                                 | 67    | NR                 | NR       | Appendicular mass                             | 0          | 0           | 0           | 0           |                           | NR                          | NR                                                   | NR                 | NR                                                                                                                                                                                                                                              | 92     |
| Clyde     | 2008 | High         | Cross sectional | USA     | Retrospective | Systematic      | One site  | 2002-2007 | Children, Adolescents, Adults, Elderly | 52    | 35                 | NR       | Catarrhal, Perforated, Unclear                | 77         | 14          | 0           | 0           |                           | Laparoscopy or Open Surgery | NR                                                   | NR                 | NR                                                                                                                                                                                                                                              | 1198   |
| Coakley   | 2011 | Low          | Cohort          | USA     | Retrospective | Exhaustive      | One site  | 2005-2010 | Adults                                 | 47.3  | 28.7               | NR       | Catarrhal, Perforated, Suppurated, Gangrenous | 38.3       | 1.2         | 47.1        | 9.8         | 100                       | Laparoscopy or Open Surgery | 1.0                                                  | NR                 | According to CDC-NNIS diagnostic Criteria                                                                                                                                                                                                       | 728    |
| Crandall  | 2009 | High         | Cross sectional | USA     | Retrospective | Not clear       | One site  | 2004-2005 | Adults                                 | 54    | 32.5               | NR       | NR                                            | NR         | 74          | NR          | NR          |                           | Laparoscopy or Open Surgery | 0.9                                                  | General            | NR                                                                                                                                                                                                                                              | 176    |
| Dede      | 2008 | Moderate     | Cohort          | Hungary | Prospective   | Consecutive     | One site  | 2005-2007 | Children, Adolescents, Adults, Elderly | NR    | NR                 | NR       | Unclear                                       | NR         | NR          | NR          | NR          |                           | Laparoscopy or Open Surgery | NR                                                   | NR                 | NR                                                                                                                                                                                                                                              | 273    |
| Dhiman    | 2013 | High         | Cross sectional | USA     | Retrospective | Not clear       | Multisite | 2003-2009 | Adults                                 | 58    | 30.1               | NR       | Unclear                                       | NR         | NR          | NR          | NR          |                           | Laparoscopy or Open Surgery | NR                                                   | General            | NR                                                                                                                                                                                                                                              | 1250   |
| Dimitriou | 2013 | Moderate     | Cohort          | Germany | Retrospective | Consecutive     | One site  | 2007-2010 | Children, Adolescents, Adults, Elderly | 53.5  | 34.9               | NR       | Unclear                                       | NR         | NR          | NR          | NR          |                           | Laparoscopy or Open Surgery | 1                                                    | NR                 | NR                                                                                                                                                                                                                                              | 404    |
| Durkin    | 2015 | Moderate     | Cohort          | USA     | Retrospective | Consecutive     | Multisite | 2007-2012 | Adults                                 | NR    | NR                 | NR       | Unclear                                       | NR         | NR          | NR          | NR          |                           | Laparoscopy                 | NR                                                   | NR                 | NR                                                                                                                                                                                                                                              | 14763  |
| Ein       | 2013 | Moderate     | Cross sectional | Canada  | Retrospective | Consecutive     | One site  | 1969-2003 | Children                               | 70    | 7                  | NR       | Perforated                                    | 0          | 100         | 0           | 0           | 78.8                      | Open Surgery                | NR                                                   | General            | 1.Wound infection=pus draining from between the stitches or staples<br>2.Intra-abdominal abscess=presence of fever, abdominal pain and or gastrointestinal dysfunction and confirmed by radiologic evidence of intra-abdominal fluid collection | 496    |



| Author    | Year | Risk of bias | Design          | Country      | Timing        | Sampling method | Sites     | Period    | Population                             | %Male | Mean or median age | %Obesity | Pattern of appendicitis                       | %Catarrhal | %Perforated | %Suppurated | %Gangrenous | % with antibiotic therapy | Type of surgery             | Time to complete the surgery intervention (in hours) | Type of anesthesia | SSI Definition                                                                                                 | Sample |
|-----------|------|--------------|-----------------|--------------|---------------|-----------------|-----------|-----------|----------------------------------------|-------|--------------------|----------|-----------------------------------------------|------------|-------------|-------------|-------------|---------------------------|-----------------------------|------------------------------------------------------|--------------------|----------------------------------------------------------------------------------------------------------------|--------|
| Fukuda    | 2016 | Moderate     | Cohort          | Japan        | Retrospective | Consecutive     | Multisite | 2007-2011 | Children, Adolescents, Adults          | 54.4  | 64.5               | NR       | Unclear                                       | NR         | NR          | NR          | NR          |                           | Laparoscopy or Open Surgery | 1.3                                                  | General            | NR                                                                                                             | 2074   |
| Gandaglia | 2014 | Low          | Cohort          | USA          | Prospective   | Consecutive     | Multisite | 2005-2011 | Adolescents, Adults, Elderly           | NR    | NR                 | NR       | Unclear                                       | NR         | NR          | NR          | NR          | 100                       | Laparoscopy or Open Surgery | NR                                                   | General            | According to CDC-NNIS diagnostic Criteria                                                                      | 97780  |
| Garcell   | 2016 | Low          | Cohort          | Cuba         | Prospective   | Consecutive     | One site  | 2013-2015 | Children, Adolescents, Adults, Elderly | 95.3  | 30.7               | 2.1      | Unclear                                       | NR         | NR          | NR          | NR          |                           | Open Surgery                | NR                                                   | NR                 | According to CDC-NNIS diagnostic Criteria                                                                      | 603    |
| Ghnam     | 2011 | Moderate     | Cross sectional | Saudi Arabia | Retrospective | Not clear       | One site  | 2007-2010 | Adults                                 | 63.4  | 49.0               | NR       | Perforated, Unclear                           | NR         | 38.1        | NR          | NR          |                           | NR                          | NR                                                   | NR                 | NR                                                                                                             | 63     |
| Giesen    | 2017 | Moderate     | Cohort          | Netherlands  | Retrospective | Consecutive     | Multisite | 2014-2015 | Children, Adults                       | 54.3  | 31                 | NR       | Catarrhal, Perforated, Suppurated, Gangrenous | 48.2       | 17.3        | 23.2        | 11.3        | 100                       | Laparoscopy or Open Surgery | 0.52                                                 | NR                 | According to CDC-NNIS diagnostic criteria                                                                      | 637    |
| Giiti     | 2010 | Moderate     | Cross sectional | Tanzania     | Prospective   | Systematic      | One site  | 2008-2009 | Children, Adolescents, Adults, Elderly | 44.7  | 27                 | NR       | Catarrhal, Perforated, Suppurated, Mass       | 87.4       | 7.0         | 1.5         | 0           |                           | NR                          | NR                                                   | NR                 | NR                                                                                                             | 199    |
| Golub     | 2016 | Moderate     | Cohort          | Russia       | Retrospective | Consecutive     | Multisite | 2012      | Adolescents, Adults                    | NR    | 34.8               | NR       | Unclear                                       | NR         | NR          | NR          | NR          | 100                       | Open Surgery                | NR                                                   | General            | NR                                                                                                             | 332    |
| Gross     | 2016 | Moderate     | Cross sectional | USA          | Retrospective | Consecutive     | Multisite | 2012-2013 | Children, Adolescents                  | 60.1  | NR                 | 17.8     | Perforated                                    | 0          | 100         | 0           | 0           |                           | Laparoscopy or Open Surgery | NT                                                   | General            | NR                                                                                                             | 2585   |
| Gurien    | 2016 | Moderate     | Cohort          | USA          | Retrospective | Consecutive     | One site  | 2009-2012 | Children, Adolescents                  | 62    | 10.5               | NR       | Unclear                                       | NR         | NR          | NR          | NR          | 100                       | Laparoscopy or Open Surgery | NR                                                   | General            | Wound infections or intra abdominal abscesses                                                                  | 484    |
| Hamzaoglu | 2004 | Low          | Cross sectional | Turkey       | Prospective   | Consecutive     | One site  | 1999-2001 | Adults                                 | 57    | 46.7               | NR       | Unclear                                       | NR         | NR          | NR          | NR          |                           | Laparoscopy or Open Surgery | NR                                                   | General            | NR                                                                                                             | 100    |
| Harmon    | 2016 | Low          | Cohort          | USA          | Retrospective | Systematic      | One site  | 2007-2012 | Children, Adolescents, Adults, Elderly | 47.4  | 39.7               | NR       | Non perforated                                | 0          | 0           | 0           | 0           |                           | Laparoscopy or Open Surgery | NR                                                   | NR                 | According to CDC-NNIS diagnostic criteria                                                                      | 411    |
| Helling   | 2017 | Low          | Cross sectional | USA          | Retrospective | Systematic      | One site  | 2009-2014 | Adults                                 | 64.3  | 34.4               | NR       | Unclear                                       | NR         | NR          | NR          | NR          | 100                       | Laparoscopy or Open Surgery | NR                                                   | NR                 | According to CDC-NNIS diagnostic criteria                                                                      | 611    |
| Helmer    | 2002 | Low          | Cross sectional | USA          | Retrospective | Systematic      | One site  | 1998-1999 | Children, Adolescents, Adults, Elderly | NR    | NR                 | NR       | Perforated, Non perforated                    | NR         | 19.4        | NR          | NR          | 100                       | NR                          | NR                                                   | NR                 | An intra-abdominal abscess was defined as an intraabdominal fluid collection that contained purulent material. | 438    |
| Hesami    | 2014 | Low          | Clinical trial  | Iran         | Prospective   | Random          | Unclear   | 2010-2011 | Children, Adolescents, Adults          | 58.9  | 27                 | NR       | Unclear                                       | NR         | NR          | NR          | NR          | 100                       | Open Surgery                | NR                                                   | NR                 | 1..wound unfection=Purulent discharge, redness, inflammation, and the need to reooen                           | 90     |

| Author     | Year | Risk of bias | Design          | Country        | Timing        | Sampling method | Sites     | Period    | Population                             | %Male | Mean or median age | %Obesity | Pattern of appendicitis                       | %Catarrhal | %Perforated | %Suppurated | %Gangrenous | % with antibiotic therapy | Type of surgery             | Time to complete the surgery intervention (in hours) | Type of anesthesia | SSI Definition                                                                                                                                                                                             | Sample |
|------------|------|--------------|-----------------|----------------|---------------|-----------------|-----------|-----------|----------------------------------------|-------|--------------------|----------|-----------------------------------------------|------------|-------------|-------------|-------------|---------------------------|-----------------------------|------------------------------------------------------|--------------------|------------------------------------------------------------------------------------------------------------------------------------------------------------------------------------------------------------|--------|
|            |      |              |                 |                |               |                 |           |           |                                        |       |                    |          |                                               |            |             |             |             |                           |                             |                                                      |                    | the wound<br>2...intra-abdominal abscess=abdominal pain, fullness, fever and confirmed by ecography                                                                                                        |        |
| Hissain    | 2012 | Moderate     | Clinical trial  | Saudi Arabia   | Prospective   | Consecutive     | One site  | 2010-2011 | Adults                                 | NR    | 32.2               | NR       | Catarrhal                                     | 100        | 0           | 0           | 0           | 100                       | Open Surgery                | NR                                                   | NR                 | 1...SSI=Pus discharge from wound needing its opening and drainage<br>2..Intra-abdominal collection=fluid collection inside the peritoneal cavity confirmed by ultrasound or CT scan that required drainage | 377    |
| Horvath    | 2016 | Moderate     | Cross sectional | Germany        | Retrospective | Consecutive     | One site  | 2005-2013 | Adults                                 | 47    | 28.6               | NR       | Perforated, phlegmonous                       | NR         | 52          | NR          | NR          |                           | Laparoscopy or Open Surgery | 1.0                                                  | General            | According to CDC-NNIS diagnostic Criteria                                                                                                                                                                  | 1516   |
| Hughes     | 2013 | Moderate     | Cross sectional | United Kingdom | Retrospective | Systematic      | One site  | 2009-2010 | Adults                                 | 55.6  | 30                 | NR       | Unclear, simple and complicated               | NR         | NR          | NR          | NR          | 100                       | Laparoscopy or Open Surgery | NR                                                   | General            | NR                                                                                                                                                                                                         | 266    |
| Hung       | 2016 | Moderate     | Cross sectional | Vietnam        | Prospective   | Systematic      | Multisite | 2008-2010 | Adults                                 | 45    | 41.6               | NR       | Unclear                                       | NR         | NR          | NR          | NR          |                           | Laparoscopy or Open Surgery | 1                                                    | General            | NR                                                                                                                                                                                                         | 752    |
| Inigo      | 2006 | Low          | Cohort          | Spain          | Prospective   | Consecutive     | One site  | 1998-2002 | Adults                                 | NR    | NR                 | NR       | Unclear                                       | NR         | NR          | NR          | NR          |                           | NR                          | 0.7                                                  | NR                 | According to CDC-NNIS diagnostic Criteria                                                                                                                                                                  | 721    |
| Iqbal      | 2015 | Low          | Clinical trial  | Pakistan       | Prospective   | Random          | One site  | 2011      | Adolescents, Adults, Elderly           | 66.3  | 26                 | NR       | Catarrhal                                     | 100        | 0           | 0           | 0           | 100                       | Open Surgery                | NR                                                   | General            | According to Southampton criteria. Southampton grade 2 and above was considered as surgical site infection.                                                                                                | 166    |
| Javadi     | 2017 | Moderate     | Clinical trial  | Iran           | Prospective   | Random          | One site  | 2016      | Children, Adolescents, Adults          | 65    | 19.3               | NR       | Catarrhal, Suppurated, Gangrenous             | NR         | 0           | NR          | NR          |                           | Open Surgery                | 0.5                                                  | General            | NR                                                                                                                                                                                                         | 69     |
| Jenkins    | 2016 | Low          | Cohort          | USA            | Prospective   | Systematic      | Multisite | 2006-2011 | Children, Adolescents, Adults, Elderly | 51.3  | 40.1               | NR       | Unclear                                       | NR         | NR          | NR          | NR          |                           | Laparoscopy or Open Surgery | NR                                                   | NR                 | According to CDC-NNIS diagnostic criteria                                                                                                                                                                  | 12410  |
| Kang       | 2012 | Moderate     | Case control    | Korea          | Retrospective | Random          | One site  | 2010-2012 | Adults                                 | 54.4  | 31.7               | NR       | Catarrhal, Perforated, Suppurated, Gangrenous | NR         | 5.1         | NR          | NR          | 100                       | Laparoscopy                 | 1.1                                                  | General            | NR                                                                                                                                                                                                         | 217    |
| Kapischke  | 2013 | Low          | Case control    | Germany        | Retrospective | Consecutive     | One site  | 1999-2001 | Children, Adolescents                  | 47.8  | 11.5               | NR       | Catarrhal, Perforated                         | NR         | NR          | NR          | NR          | 100                       | Laparoscopy or Open Surgery | 0.6                                                  | General            | According to CDC-NNIS diagnostic criteria                                                                                                                                                                  | 159    |
| Karam      | 2016 | Moderate     | Cross sectional | USA            | Retrospective | Not clear       | One site  | 2010-2015 | Children                               | 62    | 12                 | NR       | Perforated, Gangrenous                        | NR         | 20.6        | NR          | 6.2         |                           | Laparoscopy                 | NR                                                   | General            | NR                                                                                                                                                                                                         | 625    |
| Karam      | 2016 | Moderate     | Cross sectional | USA            | Retrospective | Consecutive     | One site  | 2010-2015 | Children, Adolescents                  | 63    | NR                 | NR       | Unclear                                       | NR         | NR          | NR          | NR          | 100                       | Laparoscopy                 | 1                                                    | General            | NR                                                                                                                                                                                                         | 101    |
| Kasatpibal | 2005 | Low          | Cross sectional | Thailand       | Prospective   | Systematic      | Multisite | 2003-2004 | Children, Adolescents, Adults, Elderly | 26.6  | 37.2               | NR       | Unclear                                       | NR         | NR          | NR          | NR          | 24.1                      | NR                          | 0.8                                                  | NR                 | According to CDC-NNIS diagnostic criteria                                                                                                                                                                  | 1487   |
| Kasatpibal | 2006 | Moderate     | Cohort          | Thailand       | Prospective   | Not clear       | Multisite | 2003-2004 | Children, Adolescents, Adults, Elderly | 46.9  | 26                 | NR       | Catarrhal                                     | 100        | NR          | NR          | NR          | 92.2                      | Open Surgery                | 0.97                                                 | NR                 | According to CDC-NNIS diagnostic criteria                                                                                                                                                                  | 2139   |

| Author        | Year | Risk of bias | Design          | Country        | Timing        | Sampling method | Sites     | Period    | Population                             | % Male | Mean or median age | % Obesity | Pattern of appendicitis                         | % Catarrhal | % Perforated | % Suppurated | % Gangrenous | % with antibiotic therapy | Type of surgery               | Time to complete the surgery intervention (in hours) | Type of anesthesia | SSI Definition                                                                                                                                       | Sample |
|---------------|------|--------------|-----------------|----------------|---------------|-----------------|-----------|-----------|----------------------------------------|--------|--------------------|-----------|-------------------------------------------------|-------------|--------------|--------------|--------------|---------------------------|-------------------------------|------------------------------------------------------|--------------------|------------------------------------------------------------------------------------------------------------------------------------------------------|--------|
| Kato          | 2008 | Low          | Cohort          | Japan          | Prospective   | Systematic      | One site  | 2004-2006 | Children                               | NR     | 9.4                | NR        | Perforated, Non perforated 75%                  | NR          | 25           | NR           | NR           | 100                       | Open Surgery                  | NR                                                   | NR                 | NR                                                                                                                                                   | 64     |
| Kell          | 2003 | Moderate     | Cohort          | Ireland        | Prospective   | Consecutive     | Unclear   | NR        | Children, Adolescents, Adults, Elderly | 75.2   | 20.7               | NR        | Unclear                                         | NR          | NR           | NR           | NR           | 100                       | Open Surgery                  | NR                                                   | General            | Defined based on clinical and microbiological criteria                                                                                               | 149    |
| Khan          | 2007 | Low          | Cohort          | United Kingdom | Prospective   | Consecutive     | One site  | 2006      | Children, Adolescents, Adults, Elderly | 47.0   | 24                 | NR        | Catarrhal, Perforated                           | 63.4        | 20.1         | 0            | 0            | 100                       | Laparoscopy or Open Surgery   | 0.9                                                  | General            | According to CDC-NNIS diagnostic Criteria                                                                                                            | 134    |
| Khan          | 2012 | Moderate     | Clinical trial  | Pakistan       | Prospective   | Random          | Multisite | 2006-2009 | Adults                                 | 69     | 33.3               | NR        | Unclear                                         | NR          | NR           | NR           | NR           | 100                       | Open Surgery                  | 0.6                                                  | General            | NR                                                                                                                                                   | 100    |
| Khan          | 2014 | Moderate     | Clinical trial  | Pakistan       | Prospective   | Random          | Multisite | 2013-2014 | Children, Adolescents, Adults, Elderly | 56.7   | 24                 | NR        | Unclear                                         | NR          | NR           | NR           | NR           | 100                       | Laparoscopy or Open Surgery   | NR                                                   | NR                 | Observation of pain, redness, tenderness and purulent discharge                                                                                      | 270    |
| Khuria        | 2011 | Moderate     | Cross sectional | India          | Retrospective | Consecutive     | One site  | 1999-2009 | Adults                                 | 66     | 33.4               | NR        | Perforated, Gangrenous                          | NR          | 14.3         | NR           | 5.2          | 100                       | Laparoscopy or Open Surgery   | 1.2                                                  | General            | Any evidence of infection(erythema, purulent discharge, induration...) and requiring suture removal, antibiotic treatment, or evidence of dehiscence | 497    |
| Kilic         | 2016 | Moderate     | Cross sectional | Turkey         | Retrospective | Consecutive     | One site  | 2004-2010 | Children                               | 62.1   | 9.5                | NR        | Perforated                                      | 0           | 100          | 0            | 0            | 100                       | Open Surgery                  | NR                                                   | NR                 | According to CDC-NNIS diagnostic Criteria                                                                                                            | 110    |
| Kim           | 2015 | Low          | Cross sectional | Korea          | Retrospective | Systematic      | One site  | 2008-2013 | Children, Adolescents, Adults, Elderly | 47.8   | 32.6               | NR        | Perforated, Suppurated, Gangrenous, Normal      | 6           | 13.8         | 64.5         | 7.1          | 100                       | Laparoscopy                   | 0.7                                                  | NR                 | According to CDC-NNIS diagnostic criteria                                                                                                            | 2587   |
| Kim           | 2011 | Moderate     | Cross sectional | USA            | Prospective   | Consecutive     | One site  | 2005-2008 | Elderly                                | 48.1   | 73.4               | NR        | Unclear                                         | NR          | NR           | NR           | NR           | 100                       | Laparoscopy or Open Surgery   | NR                                                   | General            | According to CDC-NNIS diagnostic Criteria                                                                                                            | 3335   |
| Kim           | 2016 | Moderate     | Cohort          | Korea          | Retrospective | Consecutive     | One site  | 2005-2012 | Adults                                 | 59     | NR                 | NR        | Perforated, Gangrenous                          | NR          | NR           | NR           | NR           | 100                       | Laparoscopy or Open Surgery   | 1.9                                                  | General            | NR                                                                                                                                                   | 207    |
| Kiriakopoulos | 2006 | Moderate     | Cross sectional | Greece         | Retrospective | Consecutive     | One site  | 2000-2004 | Adults                                 | 73.8   | 42.3               | NR        | Perforated, Suppurated, Generalized peritonitis | 0           | 61.9         | 9.5          | 0            | 100                       | Laparoscopy with Open Surgery | 1.1                                                  | General            | NRR                                                                                                                                                  | 42     |
| Kirshtein     | 2009 | Moderate     | Cross sectional | Israel         | Retrospective | Consecutive     | One site  | 2000-2007 | Adults                                 | 31.9   | 70.1               | NR        | Unclear                                         | NR          | NR           | NR           | NR           | 100                       | Laparoscopy or Open Surgery   | 0.7                                                  | General            | NR                                                                                                                                                   | 1435   |
| Kiudelis      | 2013 | Moderate     | Cross sectional | Lithuania      | Prospective   | Consecutive     | One site  | 2004-2009 | Adults                                 | 46.3   | 32.3               | NR        | Unclear                                         | NR          | NR           | NR           | NR           | 100                       | Laparoscopy                   | 1.1                                                  | General            | NR                                                                                                                                                   | 152    |
| Kleif         | 2017 | Moderate     | Cross sectional | Denmark        | Retrospective | Not clear       | Multisite | 2012-2014 | Adults                                 | 53     | 47                 | NR        | Suppurated, Gangrenous                          | NR          | NR           | NR           | NR           | 98                        | Laparoscopy or Open Surgery   | NR                                                   | General            | NR                                                                                                                                                   | 1151   |
| Koizumi       | 2014 | Moderate     | Cross sectional | Japan          | Prospective   | Consecutive     | One site  | 2010      | Adults                                 | 57.9   | 39.8               | NR        | Catarrhal, Perforated, Gangrenous, phelmong     | 6.4         | 6.4          | NR           | 25.4         | 100                       | Laparoscopy or Open Surgery   | 0.9                                                  | General            | NR                                                                                                                                                   | 185    |
| Kubota        | 2014 | Low          | Clinical trial  | Japan          | Prospective   | Random          | One site  | 2008-2012 | Children                               | 63.6   | NR                 | NR        | Unclear                                         | NR          | NR           | NR           | NR           | 100                       | Open Surgery                  | NR                                                   | General            | According to CDC-NNIS diagnostic Criteria                                                                                                            | 10     |

| Author   | Year | Risk of bias | Design          | Country  | Timing        | Sampling method | Sites     | Period    | Population                             | % Male | Mean or median age | % Obesity | Pattern of appendicitis                               | % Catarrhal | % Perforated | % Suppurated | % Gangrenous | % with antibiotic therapy | Type of surgery               | Time to complete the surgery intervention (in hours) | Type of anesthesia | SSI Definition                                                                                                                                                                                                    | Sample |
|----------|------|--------------|-----------------|----------|---------------|-----------------|-----------|-----------|----------------------------------------|--------|--------------------|-----------|-------------------------------------------------------|-------------|--------------|--------------|--------------|---------------------------|-------------------------------|------------------------------------------------------|--------------------|-------------------------------------------------------------------------------------------------------------------------------------------------------------------------------------------------------------------|--------|
| Kumamoto | 2014 | Low          | Cohort          | Japan    | Prospective   | Consecutive     | One site  | 1997-2011 | Adults                                 | 0      | 28                 | NR        | Catarrhal, Gangrenous, Phlegmonous                    | 21.8        | NR           | NR           | 33.4         | 100                       | Open Surgery                  | 0.7                                                  | General            | NR                                                                                                                                                                                                                | 124    |
| Kumar    | 2016 | Moderate     | Cohort          | Nepal    | Prospective   | Consecutive     | One site  | 2015-2016 | Adolescents, Adults                    | 49     | 33.9               | NR        | Catarrhal, Perforated, Suppurated, Gangrenous, Normal | 88.6        | 4.7          | 1.9          | 2.4          |                           | Laparoscopy or Open Surgery   | 0.7                                                  | General            | According to CDC-NNIS diagnostic Criteria                                                                                                                                                                         | 212    |
| Kumar    | 2008 | Moderate     | Cohort          | Pakistan | Prospective   | Consecutive     | One site  | 1997-2000 | Children, Adolescents, Adults, Elderly | NR     | NR                 | NR        | Unclear                                               | NR          | NR           | NR           | NR           | 50                        | Laparoscopy or Open Surgery   | 0.7                                                  | NR                 | NR                                                                                                                                                                                                                | 100    |
| Lacher   | 2012 | Moderate     | Cohort          | USA      | Prospective   | Consecutive     | One site  | 2009-2011 | Children, Adolescents                  | 64.1   | 10.9               | 22.4      | Catarrhal, Perforated                                 | 71.8        | 19           | NR           | NR           | 100                       | Laparoscopy                   | 0.7                                                  | General            | NR                                                                                                                                                                                                                | 415    |
| Le       | 2009 | Moderate     | Cross sectional | USA      | Retrospective | Systematic      | One site  | 1997-2007 | Children, Adolescents, Adults, Elderly | 52.1   | 31.8               | NR        | Catarrhal, Perforated, Gangrenous, Normal Appendix    | 92.9        | 2            | 0            | 2.2          | 86                        | Laparoscopy or Open Surgery   | 0.9                                                  | NR                 | According to CDC-NNIS diagnostic criteria                                                                                                                                                                         | 507    |
| Lee      | 2009 | Low          | Clinical trial  | USA      | Prospective   | Random          | One site  | 2006-2008 | Children, Adolescents, Adults, Elderly | 64.2   | 34.2               | NR        | Catarrhal, Perforated, Suppurated, Gangrenous         | 46.8        | 26.6         | 16.5         | 10.1         | 100                       | Open Surgery                  | NR                                                   | NR                 | Any significant subcutaneous SSI necessitating wound opening or treatment with antibiotics. This also included any subject who was prescribed a separate course of antibiotics after discharge from the hospital. | 109    |
| Lee      | 2010 | Moderate     | Cross sectional | Taiwan   | Prospective   | Consecutive     | One site  | 2006-2008 | Children                               | 58     | 11.1               | NR        | Unclear                                               | NR          | NR           | NR           | NR           |                           | Laparoscopy or Open Surgery   | 2                                                    | General            | NR                                                                                                                                                                                                                | 264    |
| Lee      | 2010 | Moderate     | Cross sectional | Korea    | Retrospective | Consecutive     | One site  | 2008-2009 | Adults                                 | 49.3   | 26.7               | NR        | Perforated, Suppurated                                | 0           | 26.7         | 73.3         | 0            |                           | Laparoscopy                   | 1.0                                                  | General            | NR                                                                                                                                                                                                                | 75     |
| Lee      | 2010 | Moderate     | Cohort          | USA      | Retrospective | Consecutive     | Multisite | 1998-2007 | Children, Adolescents                  | 61.5   | 11                 | NR        | Perforated, Non perforated                            | NR          | 25.7         | NR           | NR           |                           | Laparoscopy or Open Surgery   | NR                                                   | General            | NR                                                                                                                                                                                                                | 2462   |
| Lee      | 2011 | Moderate     | Cohort          | USA      | Retrospective | Systematic      | Multisite | 1998-2007 | Children, Adolescents                  | 61     | 11.6               | NR        | Perforated, Non perforated 70.8%                      | NR          | 29.2         | NR           | NR           |                           | Laparoscopy or Open Surgery   | NR                                                   | NR                 | NR                                                                                                                                                                                                                | 7650   |
| Lemieux  | 2008 | Moderate     | Cohort          | Canada   | Retrospective | Consecutive     | One site  | 1997-2007 | Adults                                 | 0      | 28.8               | NR        | Perforated                                            | NR          | NR           | NR           | NR           |                           | Laparoscopy with Open Surgery | 0.8                                                  | NR                 | NR                                                                                                                                                                                                                | 45     |
| Levy     | 2013 | Moderate     | Cohort          | USA      | Retrospective | Consecutive     | One site  | 2010-2011 | Children                               | NR     | NR                 | NR        | Catarrhal, Perforated, Suppurated, Gangrenous         | 56.4        | 32.7         | 4.2          | 6.7          |                           | Laparoscopy or Open Surgery   | NR                                                   | NR                 | NSQIP criteria                                                                                                                                                                                                    | 312    |

| Author      | Year | Risk of bias | Design          | Country  | Timing        | Sampling method | Sites     | Period    | Population                             | %Male | Mean or median age | %Obesity | Pattern of appendicitis                                         | %Catarrhal | %Perforated | %Suppurated | %Gangrenous | % with antibiotic therapy | Type of surgery             | Time to complete the surgery intervention (in hours) | Type of anesthesia | SSI Definition                                                                                                                       | Sample |
|-------------|------|--------------|-----------------|----------|---------------|-----------------|-----------|-----------|----------------------------------------|-------|--------------------|----------|-----------------------------------------------------------------|------------|-------------|-------------|-------------|---------------------------|-----------------------------|------------------------------------------------------|--------------------|--------------------------------------------------------------------------------------------------------------------------------------|--------|
| Li          | 2005 | Moderate     | Cohort          | China    | Prospective   | Consecutive     | One site  | 2002-2004 | Children, Adolescents                  | 71.3  | 7.9                | NR       | Catarrhal, Suppurated, Gangrenous                               | 11.0       | 0           | 69.4        | 19.7        | 100                       | Laparoscopy or Open Surgery | 0.65                                                 | General            | NR                                                                                                                                   | 160    |
| Li          | 2017 | Moderate     | Cohort          | China    | Retrospective | Consecutive     | One site  | 2005-2016 | Children                               | 58.8  | 5.2                | NR       | Unclear                                                         | NR         | NR          | NR          | NR          |                           | Laparoscopy or Open Surgery | 1                                                    | NR                 | Erythema, swelling and pus at the site of operation                                                                                  | 398    |
| Lim         | 2011 | Low          | Cohort          | Korea    | Retrospective | Consecutive     | One site  | 2009-2011 | Adults                                 | 47.8  | 50.8               | NR       | Perforated, Gangrenous                                          | 0          | 61.6        | NR          | 18.3        | 100                       | Laparoscopy or Open Surgery | 1.3                                                  | General            | Any evidence of infection (e.g., erythema, purulent discharge, induration, etc) requiring suture removal, antibiotics or dehiscence. | 60     |
| Lima        | 2007 | Moderate     | Cross sectional | Spain    | Retrospective | Consecutive     | One site  | 2001-2006 | Children, Adolescents, Adults, Elderly | NR    | NR                 | NR       | Catarrhal, Perforated, Suppurated, Gangrenous                   | 53         | 2           | 26.3        | 9.7         |                           | NR                          | NR                                                   | NR                 | NR                                                                                                                                   | 300    |
| Lin         | 2006 | Moderate     | Cross sectional | Taiwan   | Retrospective | Consecutive     | One site  | 2001-2003 | Adults                                 | 57.6  | 37.5               | NR       | Perforated                                                      | NR         | 100         | NR          | NR          | 100                       | Laparoscopy or Open Surgery | 1.4                                                  | Not described      | NR                                                                                                                                   | 229    |
| Litz        | 2016 | Moderate     | Cohort          | USA      | Retrospective | Consecutive     | One site  | 2012-2015 | Children, Adolescents                  | NR    | 11.4               | 17.7     | Catarrhal, Perforated, Suppurated, Gangrenous, Interval, Normal | 54         | 11.4        | 15.0        | 11.9        |                           | Laparoscopy                 | 0.5                                                  | General            | NR                                                                                                                                   | 413    |
| Liu         | 2017 | High         | Cross sectional | China    | Retrospective | Consecutive     | Unclear   | 2015-2016 | Children                               | 53.6  | 6.6                | NR       | Catarrhal, Suppurated, Gangrenous                               | 34.8       | 0           | 38.4        | 26.8        |                           | Laparoscopy or Open Surgery | 1.0                                                  | General            | NR                                                                                                                                   | 112    |
| Mahmood     | 2016 | Moderate     | Clinical trial  | Pakistan | Prospective   | Random          | One site  | 2012      | Children, Adolescents, Adults          | 55.5  | 22.3               | NR       | Unclear                                                         | NR         | NR          | NR          | NR          | 100                       | Laparoscopy or Open Surgery | NR                                                   | General            | Based on Wound Asepsis Score                                                                                                         | 200    |
| Martinez    | 2012 | Moderate     | Cross sectional | Spain    | Retrospective | Random          | One site  | 2011      | Adults                                 | 60    | 35.8               | NR       | Unclear                                                         | NR         | NR          | NR          | NR          |                           | Laparoscopy or Open Surgery | NR                                                   | General            | NR                                                                                                                                   | 75     |
| Mbah        | 2006 | Moderate     | Cohort          | Nigeria  | Prospective   | Consecutive     | One site  | 2005      | Children, Adolescents, Adults, Elderly | 70    | 25                 | NR       | Unclear                                                         | NR         | NR          | NR          | NR          |                           | Open Surgery                | NR                                                   | General            | NR                                                                                                                                   | 136    |
| Memon       | 2017 | Moderate     | Clinical trial  | Pakistan | Prospective   | Random          | One site  | 2014-2016 | Adults                                 | 53.3  | 26                 | NR       | Catarrhal                                                       | 100        | 0           | 0           | 0           | 100                       | Laparoscopy or Open Surgery | NR                                                   | NR                 | NR                                                                                                                                   | 227    |
| Menezes     | 2008 | Moderate     | Cross sectional | Ireland  | Retrospective | Consecutive     | One site  | 2000-2006 | Children, Adolescents                  | 62.7  | 10.5               | NR       | Perforated, Gangrenous                                          | 0          | 81.4        | 0           | 17.8        |                           | Laparoscopy or Open Surgery | NR                                                   | NR                 | NR                                                                                                                                   | 118    |
| Merenda     | 2013 | Moderate     | Cross sectional | Poland   | Retrospective | Consecutive     | One site  | 2006-2012 | Children, Adolescents, Adults, Elderly | NR    | NR                 | NR       | Unclear                                                         | NR         | NR          | NR          | NR          |                           | Laparoscopy or Open Surgery | NR                                                   | NR                 | NR                                                                                                                                   | 317    |
| Michailidou | 2015 | Low          | Cross sectional | USA      | Retrospective | Systematic      | One site  | 2007-2013 | Children, Adolescents                  | 56.1  | 9.6                | NR       | Perforated, Negative appendectomy                               | NR         | 26.5        | NR          | NR          |                           | Laparoscopy or Open Surgery | 1.3                                                  | NR                 | According to CDC-NNIS diagnostic criteria                                                                                            | 264    |
| Michailidou | 2015 | Moderate     | Cross sectional | USA      | Retrospective | Consecutive     | Multisite | 2012      | Children, Adolescents                  | 60.1  | 11.2               | 22.5     | Catarrhal, Perforated, Suppurated, Gangrenous                   | NR         | NR          | NR          | NR          | 100                       | Laparoscopy                 | 0                                                    | General            | NR                                                                                                                                   | 2812   |



| Author       | Year | Risk of bias | Design          | Country        | Timing        | Sampling method | Sites     | Period    | Population                             | % Male | Mean or median age | % Obesity | Pattern of appendicitis                       | % Catarrhal | % Perforated | % Suppurated | % Gangrenous | % with antibiotic therapy | Type of surgery               | Time to complete the surgery intervention (in hours) | Type of anesthesia | SSI Definition                                                     | Sample |
|--------------|------|--------------|-----------------|----------------|---------------|-----------------|-----------|-----------|----------------------------------------|--------|--------------------|-----------|-----------------------------------------------|-------------|--------------|--------------|--------------|---------------------------|-------------------------------|------------------------------------------------------|--------------------|--------------------------------------------------------------------|--------|
| Mickovic     | 2015 | Moderate     | Cross sectional | Serbia         | Retrospective | Not clear       | One site  | 2010      | Children                               | 46.4   | 11.7               | NR        | Catarrhal, Perforated, Gangrenous             | 45.9        | 2.2          | NR           | 19.5         | 100                       | Laparoscopy or Open Surgery   | 0.7                                                  | General            | NR                                                                 | 218    |
| Ming         | 2009 | Moderate     | Cross sectional | China          | Retrospective | Consecutive     | One site  | 2003-2005 | Adults                                 | 57.2   | 48.8               | NR        | Perforated, Gangrenous, Appendicular abscess  | NR          | 72.3         | NR           | 38.2         | 100                       | Laparoscopy or Open Surgery   | NR                                                   | General            | NR                                                                 | 173    |
| Mingmalairak | 2009 | Low          | Clinical trial  | Thailand       | Prospective   | Random          | One site  | 2006-2007 | Adults                                 | 61     | 29.5               | 0         | Catarrhal, Perforated, Suppurated, Gangrenous | 24          | 16           | 52           | 8.0          | 100                       | Open Surgery                  | 43                                                   | General            | NR                                                                 | 100    |
| Miyano       | 2010 | Low          | Cohort          | Japan          | Prospective   | Consecutive     | One site  | 2004-2008 | Children, Adolescents                  | 56.5   | 7.7                | NR        | Peritonitis complicating appendicitis         | 0           | 100          | 0            | 0            | 100                       | Laparoscopy or Open Surgery   | 1.9                                                  | General            | NR                                                                 | 23     |
| Moazzez      | 2013 | Low          | Cohort          | USA            | Retrospective | Not clear       | One site  | 2005-2009 | Elderly                                | 49.3   | 74                 | NR        | Unclear                                       | NR          | NR           | NR           | NR           |                           | Laparoscopy or Open Surgery   | NR                                                   | General            | NR                                                                 | 2060   |
| Monge Jodra  | 2003 | Moderate     | Cohort          | Spain          | Prospective   | Consecutive     | Multisite | 1997-2000 | Children, Adolescents, Adults, Elderly | NR     | NR                 | NR        | Unclear                                       | NR          | NR           | NR           | NR           |                           | NR                            | NR                                                   | NR                 | According to CDC-NNIS diagnostic Criteria                          | 5780   |
| Mueck        | 2017 | Moderate     | Cohort          | USA            | Prospective   | Consecutive     | One site  | 2012-2015 | Children, Adolescents                  | 62.5   | 11.0               | NR        | Catarrhal, Suppurated                         | NR          | NR           | NR           | NR           | 95                        | Laparoscopy with Open Surgery | NR                                                   | General            | NR                                                                 | 697    |
| Muensterer   | 2011 | Low          | Cohort          | USA            | Prospective   | Consecutive     | One site  | 2009-2010 | Children, Adolescents                  | NR     | 11.2               | NR        | Catarrhal, Perforated                         | 78.1        | 10.4         | 0            | 0            | 100                       | Laparoscopy                   | 0.6                                                  | General            | Infected umbilicus requiring antibiotics, or incision and drainage | 183    |
| Muensterer   | 2009 | Moderate     | Cross sectional | USA            | Prospective   | Consecutive     | One site  | 2009      | Children                               | 61.3   | 11                 | NR        | Perforated                                    | NR          | 21.4         | NR           | NR           |                           | Laparoscopy                   | 0.73                                                 | General            | NR                                                                 | 75     |
| Mustafa      | 2016 | Low          | Clinical trial  | Pakistan       | Prospective   | Random          | One site  | 2015-2016 | Adults                                 | 52.9   | 26.6               | NR        | Perforated                                    | 0           | 100          | 0            | 0            | 100                       | Open Surgery                  | NR                                                   | NR                 | Redness around the wound, serosanguinous discharge, fever > 100°F  | 68     |
| Nadler       | 2003 | High         | Cross sectional | USA            | Retrospective | Systematic      | One site  | 1998-2001 | Children                               | 62.2   | 9.35               | NR        | Perforated                                    | NR          | 100          | NR           | NR           | 100                       | Open Surgery                  | NR                                                   | General            | NR                                                                 | 94     |
| Nataraja     | 2010 | Moderate     | Cohort          | United Kingdom | Retrospective | Consecutive     | One site  | 2008-2010 | Children, Adolescents                  | 59.1   | 11                 | NR        | Catarrhal, Perforated, Suppurated             | NR          | NR           | NR           | NR           |                           | Laparoscopy or Open Surgery   | NR                                                   | General            | NR                                                                 | 191    |
| Nataraja     | 2012 | Moderate     | Case control    | United Kingdom | Retrospective | Consecutive     | Multisite | 2003-2010 | Children, Adolescents                  | 58.2   | 11.3               | NR        | Catarrhal, Perforated, Suppurated, Gangrenous | NR          | NR           | NR           | NR           |                           | Laparoscopy or Open Surgery   | NR                                                   | General            | Post op intra abdominal abscess                                    | 1205   |
| Obayashi     | 2015 | Moderate     | Cross sectional | Japan          | Retrospective | Consecutive     | One site  | 2006-2014 | Children, Adolescents                  | 60     | 11                 | NR        | Unclear                                       | NR          | NR           | NR           | NR           |                           | Laparoscopy or Open Surgery   | NR                                                   | NR                 | NR                                                                 | 485    |
| Obinwa       | 2015 | Moderate     | Cohort          | Ireland        | Retrospective | Consecutive     | One site  | 1995-2008 | Children                               | 54.5   | 9.6                | NR        | Catarrhal, Perforated, Suppurated, Gangrenous | 62.7        | NR           | NR           | 4.2          | 100                       | NR                            | NR                                                   | NR                 | NR                                                                 | 1037   |
| Ohene        | 2006 | Moderate     | Cross sectional | Ghana          | Prospective   | Consecutive     | One site  | 1998-2004 | Adults                                 | 63.9   | 32.4               | NR        | Unclear                                       | NR          | NR           | NR           | NR           | 100                       | Open Surgery                  | NR                                                   | General            | NR                                                                 | 638    |
| Okkyung      | 2002 | Moderate     | Clinical trial  | Korea          | Prospective   | Random          | One site  | 2002      | Children, Adolescents, Adults, Elderly | 54.7   | 30.5               | NR        | Catarrhal, Suppurated, Gangrenous             | NR          | 0            | 50           | 27.3         | 100                       | Open Surgery                  | NR                                                   | General            | NR                                                                 | 84     |

| Author          | Year | Risk of bias | Design          | Country      | Timing        | Sampling method | Sites     | Period    | Population                             | % Male | Mean or median age | % Obesity | Pattern of appendicitis                            | % Catarrhal | % Perforated | % Suppurated | % Gangrenous | % with antibiotic therapy | Type of surgery               | Time to complete the surgery intervention (in hours) | Type of anesthesia | SSI Definition                            | Sample |
|-----------------|------|--------------|-----------------|--------------|---------------|-----------------|-----------|-----------|----------------------------------------|--------|--------------------|-----------|----------------------------------------------------|-------------|--------------|--------------|--------------|---------------------------|-------------------------------|------------------------------------------------------|--------------------|-------------------------------------------|--------|
| Onieva          | 2017 | Moderate     | Cross sectional | Spain        | Retrospective | Consecutive     | One site  | 2012-2014 | Children, Adolescents, Adults, Elderly | 53.7   | 32                 | NR        | Unclear                                            | NR          | NR           | NR           | NR           |                           | Laparoscopy or Open Surgery   | NR                                                   | NR                 | NR                                        | 294    |
| Page            | 2010 | Moderate     | Cross sectional | USA          | Retrospective | Exhaustive      | Multisite | 2008      | Adults                                 | 51.4   | 39.2               | NR        | Unclear                                            | NR          | NR           | NR           | NR           |                           | Laparoscopy or Open Surgery   | 0.94                                                 | General            | NR                                        | 17199  |
| Palesty         | 2004 | Moderate     | Cross sectional | USA          | Retrospective | Consecutive     | One site  | 2000-2002 | Adults                                 | 47     | 25.2               | NR        | Unclear                                            | NR          | NR           | NR           | NR           | 100                       | Laparoscopy                   | 1.2                                                  | General            | NR                                        | 50     |
| Pandit          | 2016 | High         | Cohort          | Nepal        | Retrospective | Consecutive     | Multisite | 2009-2014 | Children, Adolescents, Adults          | 51     | 24.3               | NR        | Perforated, Suppurated                             | NR          | 2.6          | 97.4         | 0            |                           | Open Surgery                  | 0.6                                                  | Spinal and General | NR                                        | 101    |
| Parcells        | 2009 | Low          | Cohort          | USA          | Retrospective | Systematic      | One site  | 1997-2007 | Adults                                 | NR     | 39.3               | NR        | Perforated, Not perforated                         | NR          | 33.1         | NR           | NR           |                           | Laparoscopy or Open Surgery   | NR                                                   | NR                 | According to CDC-NNIS diagnostic criteria | 1063   |
| Park            | 2017 | Low          | Cohort          | Korea        | Prospective   | Systematic      | One site  | 2012-2014 | Adults                                 | 53.3   | 37.45              | NR        | Perforated, Gangrenous                             | NR          | 38.7         | NR           | 45.9         |                           | Laparoscopy                   | 1.1                                                  | General            | According to CDC-NNIS diagnostic Criteria | 1343   |
| Park            | 2018 | Moderate     | Cohort          | Korea        | Retrospective | Consecutive     | One site  | 2009-2013 | Adults                                 | 53.7   | 34.2               | NR        | Perforated                                         | NR          | 13.2         | NR           | NR           |                           | Laparoscopy with Open Surgery | 1.1                                                  | General            | NR                                        | 986    |
| Pascual         | 2017 | Moderate     | Cohort          | Spain        | Prospective   | Consecutive     | One site  | 2013-2017 | Adults                                 | 49     | 41                 | NR        | Unclear                                            | NR          | NR           | NR           | NR           |                           | Laparoscopy                   | 0.1                                                  | General            | NR                                        | 100    |
| Patel           | 2003 | High         | Cohort          | Kenya        | Retrospective | Consecutive     | One site  | 1996-2002 | Children, Adolescents, Adults          | 30.2   | 30.6               | NR        | Catarrhal, Suppurated, Gangrenous, Carcinoid tumor | 94.3        | 0            | 0.9          | 2.8          | 100                       | Laparoscopy with Open Surgery | 1.5                                                  | General            | NR                                        | 106    |
| Pearcy          | 2017 | Moderate     | Case control    | USA          | Retrospective | Random          | Multisite | 2010-2014 | Adults                                 | 54     | 36                 | NR        | Unclear                                            | NR          | NR           | NR           | NR           |                           | NR                            | 1.1                                                  | NR                 | NR                                        | 2903   |
| Pishori         | 2003 | Low          | Cross sectional | Pakistan     | Prospective   | Systematic      | One site  | 1997-1999 | Children, Adolescents, Adults, Elderly | NR     | NR                 | NR        | Unclear                                            | NR          | NR           | NR           | NR           |                           | NR                            | NR                                                   | NR                 | According to CDC-NNIS diagnostic criteria | 3304   |
| Putnam          | 2016 | Moderate     | Cross sectional | USA          | Prospective   | Consecutive     | One site  | 2012-2015 | Children, Adolescents                  | 61     | 9.4                | NR        | Perforated, Suppurated, Gangrenous                 | 0           | 100          | 0            | 0            | 100                       | Laparoscopy or Open Surgery   | 0.9                                                  | General            | NR                                        | 410    |
| Qahtani         | 2014 | Moderate     | Cohort          | Saudi Arabia | Prospective   | Random          | One site  | 2012      | Adolescents, Adults                    | 68     | 23.6               | NR        | Catarrhal, Perforated, Gangrenous                  | 9.6         | 19.9         | NR           | 22.4         | 100                       | Open Surgery                  | 1.5                                                  | General            | NR                                        | 91     |
| Quezada         | 2015 | Moderate     | Cohort          | Chile        | Retrospective | Consecutive     | One site  | 2003-2013 | Adults                                 | 43     | 39                 | NR        | Unclear                                            | NR          | NR           | NR           | NR           |                           | Laparoscopy or Open Surgery   | 2.2                                                  | NR                 | NR                                        | 227    |
| Raakow          | 2014 | High         | Cohort          | Germany      | Prospective   | Not clear       | One site  | 2009-2013 | Adolescents, Adults                    | 28.8   | 27.2               | NR        | Catarrhal, Suppurated, Gangrenous                  | 12.8        | 0            | 16           | 4            |                           | Laparoscopy                   | 0.8                                                  | General            | NR                                        | 156    |
| Rafiq           | 2015 | Low          | Clinical trial  | Pakistan     | Prospective   | Random          | One site  | 2012-2014 | Adolescents, Adults, Elderly           | 48.5   | 22.6               | 0         | Unclear                                            | NR          | NR           | NR           | NR           | 100                       | Open Surgery                  | 0.7                                                  | General            | NR                                        | 390    |
| Rajabi-Mashhadi | 2012 | Moderate     | Clinical trial  | Iran         | Prospective   | Random          | One site  | 2006-2007 | Adults                                 | 62.5   | 26.2               | NR        | Unclear, Non perforated                            | NR          | NA           | NR           | NR           | 100                       | Open Surgery                  | NR                                                   | NR                 | NR                                        | 291    |

| Author        | Year | Risk of bias | Design          | Country     | Timing               | Sampling method | Sites     | Period    | Population                             | % Male | Mean or median age | % Obesity | Pattern of appendicitis                       | % Catarrhal | % Perforated | % Suppurated | % Gangrenous | % with antibiotic therapy | Type of surgery               | Time to complete the surgery intervention (in hours) | Type of anesthesia | SSI Definition                                                                                                                                                                                                                                                                                                                                                  | Sample |
|---------------|------|--------------|-----------------|-------------|----------------------|-----------------|-----------|-----------|----------------------------------------|--------|--------------------|-----------|-----------------------------------------------|-------------|--------------|--------------|--------------|---------------------------|-------------------------------|------------------------------------------------------|--------------------|-----------------------------------------------------------------------------------------------------------------------------------------------------------------------------------------------------------------------------------------------------------------------------------------------------------------------------------------------------------------|--------|
| Reinisch      | 2017 | Moderate     | Cross sectional | Germany     | Retrospective        | Consecutive     | One site  | 2008-2015 | Adults                                 | 56     | 32                 | NR        | Unclear                                       | NR          | NR           | NR           | NR           | 100                       | Laparoscopy with Open Surgery | NR                                                   | General            | NR                                                                                                                                                                                                                                                                                                                                                              | 680    |
| Rios          | 2004 | High         | Cross sectional | Peru        | Not reported/Unclear | Consecutive     | One site  | 2001-2002 | Children, Adolescents, Adults, Elderly | NR     | 30.6               | NR        | Catarrhal, Perforated, Suppurated, Gangrenous | 15.38       | 16.35        | 44.23        | 24.04        | 100                       | NR                            | 0.98                                                 | Unclear            | NR                                                                                                                                                                                                                                                                                                                                                              | 104    |
| Romano        | 2014 | Moderate     | Cross sectional | USA         | Retrospective        | Systematic      | One site  | 2010-2012 | Adults                                 | 66     | 35.7               | NR        | Gangrenous                                    | NR          | NR           | NR           | 9.7          | 86                        | Laparoscopy                   | NR                                                   | General            | NR                                                                                                                                                                                                                                                                                                                                                              | 372    |
| Romel Hilaire | 2014 | Moderate     | Cross sectional | Cuba        | Retrospective        | Consecutive     | One site  | 2007-2009 | Adults                                 | 100    | NR                 | NR        | Suppurated                                    | 0           | 0            | 100          | 0            |                           | Laparoscopy or Open Surgery   | NR                                                   | NR                 | NR                                                                                                                                                                                                                                                                                                                                                              | 720    |
| Romeo         | 2009 | Moderate     | Cross sectional | Colombia    | Retrospective        | Consecutive     | One site  | 1997      | Children, Adolescents, Adults, Elderly | NR     | NR                 | NR        | Unclear                                       | NR          | NR           | NR           | NR           |                           | Laparoscopy                   | NR                                                   | NR                 | NR                                                                                                                                                                                                                                                                                                                                                              | 310    |
| Romy          | 2008 | Low          | Cross sectional | Switzerland | Prospective          | Systematic      | Multisite | 1998-2004 | Children, Adolescents, Adults, Elderly | 53.9   | 32.7               | NR        | Unclear                                       | NR          | NR           | NR           | NR           | 59.5                      | Laparoscopy or Open Surgery   | NR                                                   | NR                 | According to CDC-NNIS diagnostic criteria                                                                                                                                                                                                                                                                                                                       | 2468   |
| Rooh-ul-Muqim | 2010 | Moderate     | Cohort          | Pakistan    | Prospective          | Consecutive     | One site  | 2008-2009 | Adolescents, Adults, Elderly           | 48.5   | 24                 | NR        | Catarrhal, Perforated, Suppurated, Gangrenous | NR          | NR           | NR           | NR           | 100                       | Laparoscopy or Open Surgery   | 0.5                                                  | General            | NR                                                                                                                                                                                                                                                                                                                                                              | 165    |
| Rossem        | 2015 | Moderate     | Cohort          | Netherlands | Prospective          | Consecutive     | Multisite | 2014      | Adults                                 | 47.5   | 44                 | NR        | Perforated, Gangrenous                        | NR          | 68           | 10.4         | 21.7         | 100                       | Laparoscopy with Open Surgery | 0.9                                                  | General            | NR                                                                                                                                                                                                                                                                                                                                                              | 415    |
| Rossem        | 2016 | Low          | Cohort          | Netherlands | Prospective          | Not clear       | Multisite | 2014      | Children, Adolescents, Adults          | 46.2   | 28.0               | NR        | Unclear                                       | NR          | NR           | NR           | NR           |                           | Laparoscopy                   | 0.8                                                  | General            | Superficial surgical site infection: recorded when administration of antibiotics, opening of the incision or both was necessary. An intra-abdominal abscess was defined as a postoperative intra-abdominal fluid collection diagnosed by cross-sectional imaging for which administration of antibiotics or a radiological or surgical intervention was needed. | 1995   |
| Rotermann     | 2004 | Moderate     | Cohort          | Canada      | Retrospective        | Consecutive     | Multisite | 1997-2000 | Children, Adolescents, Adults, Elderly | 55.2   | NR                 | NR        | Unclear                                       | NR          | NR           | NR           | NR           |                           | NR                            | NR                                                   | NR                 | According to CDC-NNIS diagnostic criteria                                                                                                                                                                                                                                                                                                                       | 80867  |

| Author          | Year | Risk of bias | Design          | Country     | Timing        | Sampling method | Sites     | Period    | Population                             | % Male | Mean or median age | % Obesity | Pattern of appendicitis                       | % Catarrhal | % Perforated | % Suppurated | % Gangrenous | % with antibiotic therapy | Type of surgery             | Time to complete the surgery intervention (in hours) | Type of anesthesia | SSI Definition                                                                                                                                                                                                                                                                                                                                | Sample |
|-----------------|------|--------------|-----------------|-------------|---------------|-----------------|-----------|-----------|----------------------------------------|--------|--------------------|-----------|-----------------------------------------------|-------------|--------------|--------------|--------------|---------------------------|-----------------------------|------------------------------------------------------|--------------------|-----------------------------------------------------------------------------------------------------------------------------------------------------------------------------------------------------------------------------------------------------------------------------------------------------------------------------------------------|--------|
| Saar            | 2016 | Low          | Cross sectional | Estonia     | Prospective   | Consecutive     | One site  | 2013-2014 | Adults                                 | 48.9   | 35.4               | NR        | Perforated, Gangrenous                        | NR          | 15.4         | NR           | 59.4         | 95.1                      | Laparoscopy or Open Surgery | 0.7                                                  | General            | According to CDC-NNIS diagnostic Criteria                                                                                                                                                                                                                                                                                                     | 266    |
| Saber           | 2010 | Moderate     | Clinical trial  | USA         | Prospective   | Consecutive     | One site  | 2008-2009 | Adults                                 | 42.3   | 33                 | NR        | Catarrhal                                     | 100         | 0            | 0            | 0            |                           | Laparoscopy                 | 0.8                                                  | NR                 | NR                                                                                                                                                                                                                                                                                                                                            | 26     |
| Sadraei-Mosavi  | 2017 | Moderate     | Clinical trial  | Iran        | Prospective   | Random          | One site  | 2013-2014 | Adults                                 | NR     | 28.4               | NR        | Catarrhal                                     | 100         | 0            | 0            | 0            | 100                       | Open Surgery                | NR                                                   | NR                 | SSI=pus discharge from wound, redness, tenderness, edema                                                                                                                                                                                                                                                                                      | 152    |
| Saha            | 2010 | Moderate     | Cohort          | Bangladesh  | Prospective   | Consecutive     | One site  | 2007-2008 | Children                               | NR     | NR                 | NR        | Unclear                                       | NR          | NR           | NR           | NR           | 100                       | Laparoscopy or Open Surgery | NR                                                   | NR                 | NR                                                                                                                                                                                                                                                                                                                                            | 60     |
| Sahm            | 2010 | Moderate     | Cross sectional | Germany     | Prospective   | Systematic      | One site  | 1998-2006 | Adults                                 | 54     | 39                 | NR        | Catarrhal, Perforated, Gangrenous             | 50.7        | 17.0         | NR           | 6.9          | 100                       | Laparoscopy or Open Surgery | 1.0                                                  | General            | NR                                                                                                                                                                                                                                                                                                                                            | 1710   |
| Sahm            | 2015 | Moderate     | Cross sectional | Germany     | Prospective   | Exhaustive      | Multisite | 1988-2009 | Children, Adolescents, Adults, Elderly | 43     | 31                 | NR        | Perforated, Non Perforated                    | NR          | 8.5          | NR           | NR           |                           | Laparoscopy or Open Surgery | NR                                                   | NR                 | NR                                                                                                                                                                                                                                                                                                                                            | 12570  |
| Saló            | 2016 | High         | Cohort          | Sweden      | Retrospective | Consecutive     | One site  | 2006-2014 | Children                               | 55.6   | 10.4               | NR        | Perforated, Gangrenous, Phlegmonous           | NR          | 7.3          | NR           | 11.6         | 100                       | Laparoscopy                 | 0.94                                                 | NR                 | NR                                                                                                                                                                                                                                                                                                                                            | 259    |
| Sanchez-Santana | 2017 | Low          | Cohort          | Spain       | Prospective   | Consecutive     | One site  | 2007-2015 | Adults                                 | 55.2   | 32.9               | 2.6       | Unclear                                       | NR          | NR           | NR           | NR           | 71.3                      | Laparoscopy or Open Surgery | NR                                                   | NR                 | According to CDC-NNIS diagnostic criteria                                                                                                                                                                                                                                                                                                     | 930    |
| Sauvain         | 2016 | Moderate     | Cohort          | Switzerland | Retrospective | Consecutive     | Multisite | 2007-2011 | Adults                                 | 53.2   | 34                 | NR        | Catarrhal, Perforated, Suppurated, Gangrenous | NR          | 19           | NR           | NR           |                           | Laparoscopy or Open Surgery | NR                                                   | NR                 | NR                                                                                                                                                                                                                                                                                                                                            | 2559   |
| Scarborough     | 2012 | Low          | Cross sectional | USA         | Retrospective | Systematic      | Multisite | 2005-2009 | Children, Adolescents, Adults, Elderly | 52     | 38.9               | NR        | Perforated, Non rupture                       | NR          | 11.2         | NR           | NR           |                           | Laparoscopy or Open Surgery | 0.9                                                  | NR                 | According to CDC-NNIS diagnostic criteria                                                                                                                                                                                                                                                                                                     | 39122  |
| Scarless        | 2013 | Moderate     | Clinical trial  | Scotland    | Prospective   | Random          | One site  | 2011      | Adults                                 | 53     | 32                 | NR        | Unclear                                       | NR          | NR           | NR           | NR           |                           | Laparoscopy                 | 1.4                                                  | General            | NR                                                                                                                                                                                                                                                                                                                                            | 38     |
| Seifarth        | 2016 | Moderate     | Cohort          | USA         | Retrospective | Consecutive     | Multisite | 2007-2012 | Children, Adults                       | 60     | 12                 | NR        | Catarrhal                                     | 100         | 0            | 0            | 0            |                           | Laparoscopy                 | NR                                                   | General            | NR                                                                                                                                                                                                                                                                                                                                            | 1283   |
| Seifarth        | 2016 | Low          | Cohort          | USA         | Retrospective | Consecutive     | Multisite | 2007-2012 | Children, Adolescents, Adults          | 60     | 12                 | NR        | Perforated, Suppurated, Gangrenous            | 100         | 0            | 0            | 0            |                           | Laparoscopy                 | NR                                                   | NR                 | NR                                                                                                                                                                                                                                                                                                                                            | 1283   |
| Senekjan        | 2013 | Moderate     | Cohort          | USA         | Retrospective | Consecutive     | Multisite | 2005-2009 | Adolescents                            | 56.5   | 40.3               | NR        | Unclear                                       | NR          | NR           | NR           | NR           |                           | Laparoscopy or Open Surgery | 0.9                                                  | NR                 | 1) SSI (superficial and deep incisional)...infection within 30 days of operation and involved skin, subcutaneous tissue or deep soft tissue<br>2) Organ space infection (OSI)...infection within 30 days of operation when the infection appeared to be related to the operation and involved any part of the anatomy other than the incision | 61830  |

| Author          | Year | Risk of bias | Design          | Country     | Timing        | Sampling method | Sites     | Period    | Population                             | %Male | Mean or median age | %Obesity | Pattern of appendicitis                                      | %Catarrhal | %Perforated | %Suppurated | %Gangrenous | % with antibiotic therapy | Type of surgery               | Time to complete the surgery intervention (in hours) | Type of anesthesia | SSI Definition                            | Sample |
|-----------------|------|--------------|-----------------|-------------|---------------|-----------------|-----------|-----------|----------------------------------------|-------|--------------------|----------|--------------------------------------------------------------|------------|-------------|-------------|-------------|---------------------------|-------------------------------|------------------------------------------------------|--------------------|-------------------------------------------|--------|
| Seo             | 2002 | Moderate     | Cross sectional | Korea       | Retrospective | Systematic      | One site  | 2000      | Adults                                 | 0     | NR                 | NR       | Catarrhal, Perforated, Suppurated, Gangrenous                | 14.7       | 15.6        | 49.5        | 20.2        |                           | NR                            | NR                                                   | NR                 | NR                                        | 129    |
| Sesia           | 2011 | Moderate     | Cohort          | Germany     | Prospective   | Consecutive     | One site  | 2006-2008 | Children, Adolescents, Adults, Elderly | NR    | NR                 | NR       | Unclear                                                      | NR         | NR          | NR          | NR          | 100                       | Laparoscopy or Open Surgery   | 1                                                    | NR                 | NR                                        | 265    |
| Shaikg          | 2011 | Moderate     | Cross sectional | Pakistan    | Prospective   | Consecutive     | One site  | 2007-2009 | Adults                                 | 51.4  | 29                 | NR       | Catarrhal, Perforated, Suppurated                            | 82.86      | 8.67        | 1.51        | 0           |                           | Open Surgery                  | NR                                                   | General            | NR                                        | 461    |
| Shang           | 2017 | Moderate     | Cohort          | China       | Retrospective | Consecutive     | One site  | 2013-2016 | Adults                                 | 54.3  | 2.2                | NR       | Unclear                                                      | NR         | NR          | NR          | NR          |                           | Laparoscopy or Open Surgery   | NR                                                   | NR                 | Erythema, swelling and purulent discharge | 398    |
| Shimizu         | 2014 | Low          | Cross sectional | Japan       | Retrospective | Not clear       | One site  | 2000-2012 | Adults                                 | 44    | 35                 | NR       | Catarrhal, Gangrenous                                        | 19         | NR          | NR          | 37          |                           | Open Surgery                  | NR                                                   | General            | According to CDC-NNIS diagnostic Criteria | 300    |
| Shindholimath   | 2011 | Moderate     | Cross sectional | India       | Retrospective | Consecutive     | One site  | 2007-2009 | Adults                                 | 68.4  | NR                 | NR       | Perforated, Suppurated, Gangrenous, Appendicular abscess     | 0          | 36.8        | 5.3         | 26.3        | 100                       | Laparoscopy                   | 1.6                                                  | General            | NR                                        | 19     |
| Siam            | 2017 | Moderate     | Cohort          | Israel      | Retrospective | Consecutive     | One site  | 2008-2015 | Adults                                 | 62.8  | 34.1               | NR       | Unclear                                                      | NR         | NR          | NR          | NR          | 100                       | Laparoscopy with Open Surgery | 0.7                                                  | General            | NR                                        | 1649   |
| Silva           | 2008 | Moderate     | Cohort          | Chile       | Prospective   | Random          | One site  | 2005-2006 | Adults                                 | 58.9  | NR                 | NR       | Unclear                                                      | NR         | NR          | NR          | NR          |                           | Open Surgery                  | NR                                                   | General            | NR                                        | 433    |
| Singh           | 2017 | Moderate     | Clinical trial  | India       | Prospective   | Consecutive     | One site  | 2014-2015 | Adults                                 | 43.2  | 28.7               | 11.4     | Unclear                                                      | NR         | NR          | NR          | NR          |                           | Laparoscopy or Open Surgery   | NR                                                   | General            | NR                                        | 44     |
| Siribumrungwong | 2013 | Low          | Cohort          | Thailand    | Retrospective | Systematic      | One site  | 2006      | Adults                                 | 65    | 37                 | NR       | Perforated                                                   | NR         | 100         | NR          | NR          | 100                       | Open Surgery                  | 1.2                                                  | NR                 | According to CDC-NNIS diagnostic criteria | 128    |
| Sivrikoz        | 2015 | Moderate     | Cohort          | USA         | Retrospective | Exhaustive      | Multisite | 2004-2010 | Children, Adolescents, Adults, Elderly | 52.1  | 48                 | NR       | Unclear                                                      | NR         | NR          | NR          | NR          |                           | Laparoscopy or Open Surgery   | 0.9                                                  | NR                 | NR                                        | 4844   |
| Soll            | 2016 | Low          | Cohort          | Switzerland | Retrospective | Consecutive     | One site  | 2009-2013 | Children, Adolescents, Adults, Elderly | 54.7  | 26.5               | NR       | Catarrhal, Perforated, Suppurated, Gangrenous                | NR         | 46          | NR          | NR          | 100                       | Laparoscopy                   | 1                                                    | NR                 | According to CDC-NNIS diagnostic Criteria | 813    |
| Sozutek         | 2013 | Low          | Clinical trial  | Turkey      | Retrospective | Consecutive     | One site  | 2010-2011 | Adults                                 | 44    | 30.9               | NR       | Catarrhal, Perforated                                        | 57         | 20          | NR          | NR          |                           | Laparoscopy or Open Surgery   | 0.5                                                  | General            | NR                                        | 75     |
| Srishewachart   | 2016 | Moderate     | Cross sectional | Thailand    | Retrospective | Consecutive     | One site  | 2012-2014 | Children, Adolescents, Adults, Elderly | 52    | 43.7               | 7.4      | Unclear                                                      | NR         | NR          | NR          | NR          |                           | Open Surgery                  | NR                                                   | General            | NR                                        | 450    |
| Staszewicz      | 2014 | Moderate     | Cohort          | Switzerland | Prospective   | Systematic      | Multisite | 1998-2011 | Children, Adolescents, Adults, Elderly | 54    | 34.2               | NR       | Unclear                                                      | NR         | NR          | NR          | NR          |                           | Laparoscopy or Open Surgery   | 1                                                    | NR                 | According to CDC-NNIS diagnostic Criteria | 6383   |
| Suttie          | 2004 | High         | Case control    | Scotland    | Retrospective | Not clear       | One site  | 1997-2002 | Children                               | 50    | 10.8               | NR       | Perforated, Suppurated, Gangrenous                           | 0          | 2           | 50          | 14          |                           | Laparoscopy                   | 1                                                    | General            | NR                                        | 60     |
| Svensson        | 2016 | Moderate     | Cohort          | Sweden      | Prospective   | Consecutive     | One site  | 2006-2010 | Children, Adolescents                  | 60.2  | 11.3               | NR       | Catarrhal, Perforated, Suppurated, Gangrenous, not described | 6.6        | 21.8        | 44.6        | 29.8        | 100                       | Laparoscopy or Open Surgery   | 0.7                                                  | General            | NR                                        | 1745   |



| Author     | Year | Risk of bias | Design          | Country     | Timing        | Sampling method | Sites     | Period    | Population                             | % Male | Mean or median age | % Obesity | Pattern of appendicitis                            | % Catarrhal | % Perforated | % Suppurated | % Gangrenous | % with antibiotic therapy | Type of surgery               | Time to complete the surgery intervention (in hours) | Type of anesthesia | SSI Definition                            | Sample |
|------------|------|--------------|-----------------|-------------|---------------|-----------------|-----------|-----------|----------------------------------------|--------|--------------------|-----------|----------------------------------------------------|-------------|--------------|--------------|--------------|---------------------------|-------------------------------|------------------------------------------------------|--------------------|-------------------------------------------|--------|
| Taguchi    | 2015 | Moderate     | Clinical trial  | Japan       | Prospective   | Random          | One site  | 2009-2014 | Adults                                 | 65.43  | 47.5               | NR        | Unclear                                            | NR          | NR           | NR           | NR           |                           | Laparoscopy or Open Surgery   | 1.2                                                  | General            | According to CDC-NNIS diagnostic Criteria | 81     |
| Tanaka     | 2007 | Moderate     | Cohort          | Japan       | Retrospective | Consecutive     | One site  | 2002-2005 | Children                               | 54.3   | 2.2                | NR        | Unclear                                            | NR          | NR           | NR           | NR           |                           | Laparoscopy or Open Surgery   | NR                                                   | NR                 | NR                                        | 95     |
| Tijerina   | 2010 | Low          | Clinical trial  | Mexico      | Prospective   | Exhaustive      | One site  | 2005-2007 | Children, Adolescents, Adults, Elderly | 46     | NR                 | NR        | Unclear                                            | NR          | NR           | NR           | NR           | 100                       | Open Surgery                  | NR                                                   | General            | NR                                        | 529    |
| Toro Pablo | 2017 | Moderate     | Cohort          | Spain       | Retrospective | Consecutive     | One site  | 2012-2016 | Children, Adolescents, Adults          | NR     | 26                 | NR        | Unclear                                            | NR          | NR           | NR           | NR           |                           | Laparoscopy or Open Surgery   | NR                                                   | NR                 | NR                                        | 600    |
| Towfigh    | 2011 | Low          | Clinical trial  | USA         | Prospective   | Random          | One site  | 2007-2009 | Adults                                 | 77.3   | 33                 | NR        | Perforated                                         | 0           | 100          | 0            | 0            |                           | Open Surgery                  | NR                                                   | NR                 | NR                                        | 75     |
| Troillet   | 2017 | Low          | Cohort          | Switzerland | Prospective   | Consecutive     | Multisite | 2011-2015 | Children, Adolescents, Adults, Elderly | NR     | NR                 | NR        | Unclear                                            | NR          | NR           | NR           | NR           | 92.2                      | Laparoscopy or Open Surgery   | NR                                                   | NR                 | According to CDC-NNIS diagnostic Criteria | 15439  |
| Tsioplis   | 2013 | Moderate     | Cross sectional | Germany     | Retrospective | Consecutive     | One site  | 1999-2008 | Children, Adolescents, Adults, Elderly | 51     | 23                 | 9         | Catarrhal, Perforated, Suppurated, Gangrenous      | 19          | NR           | 50           | 25           | 75                        | Laparoscopy or Open Surgery   | NR                                                   | Not reported       | NR                                        | 1439   |
| Vahdad     | 2016 | Moderate     | Cross sectional | Germany     | Retrospective | Systematic      | One site  | 2008-2012 | Children, Adolescents                  | 52.4   | NR                 | NR        | Catarrhal, Perforated, Phelgmonous in 43% of cases | 48.2        | 8.7          | NR           | NR           |                           | Laparoscopy                   | 1.1                                                  | NR                 | NR                                        | 309    |
| Van Rossem | 2016 | High         | Cohort          | Netherlands | Prospective   | Consecutive     | Multisite | 2014      | Adults                                 | 49.7   | 39.0               | NR        | Catarrhal, Perforated, Gangrenous                  | 73.7        | 11.0         | NR           | 9.9          | 96.6                      | Laparoscopy or Open Surgery   | 0.72                                                 | NR                 | NR                                        | 1378   |
| Van Rossem | 2014 | High         | Cohort          | Netherlands | Retrospective | Consecutive     | Multisite | 2004-2010 | Adults                                 | 53.2   | 49                 | NR        | Perforated                                         | 0           | 100          | 0            | 0            | 100                       | Laparoscopy or Open Surgery   | 0.85                                                 | NR                 | NR                                        | 267    |
| Wang-Chan  | 2017 | Low          | Cross sectional | Switzerland | Retrospective | Consecutive     | One site  | 2013-2014 | Children, Adolescents, Adults, Elderly | 55.3   | 47                 | 13.8      | Unclear                                            | NR          | NR           | NR           | NR           |                           | Laparoscopy with Open Surgery | NR                                                   | General            | According to CDC-NNIS diagnostic Criteria | 246    |
| Watanabe   | 2011 | Low          | Cross sectional | Japan       | Prospective   | Consecutive     | Multisite | 2005-2006 | Adults                                 | 59.4   | 63.8               | NR        | Unclear                                            | NR          | NR           | NR           | NR           |                           | Laparoscopy or Open Surgery   | NR                                                   | General            | According to CDC-NNIS diagnostic Criteria | 903    |
| Willis     | 2016 | Moderate     | Cohort          | USA         | Prospective   | Consecutive     | One site  | 2013-2014 | Children, Adolescents                  | 58.5   | 8.8                | NR        | Unclear                                            | NR          | NR           | NR           | NR           | 100                       | Laparoscopy or Open Surgery   | NR                                                   | General            | NR                                        | 313    |
| Wong       | 2015 | High         | Cohort          | Peru        | Prospective   | Not clear       | Multisite | 2005-2010 | Adults                                 | NR     | NR                 | NR        | Unclear                                            | NR          | NR           | NR           | NR           |                           | Laparoscopy or Open Surgery   | NR                                                   | General            | NR                                        | 352    |
| Wu         | 2006 | Low          | Cross sectional | Taiwan      | Retrospective | Not clear       | One site  | 2001-2005 | Adults                                 | 75     | 42                 | NR        | Unclear                                            | NR          | NR           | NR           | NR           |                           | Laparoscopy or Open Surgery   | 0.95                                                 | General            | NR                                        | 1795   |

| Author     | Year | Risk of bias | Design          | Country | Timing        | Sampling method | Sites     | Period    | Population                             | % Male | Mean or median age | % Obesity | Pattern of appendicitis            | % Catarrhal | % Perforated | % Suppurated | % Gangrenous | % with antibiotic therapy | Type of surgery             | Time to complete the surgery intervention (in hours) | Type of anesthesia | SSI Definition | Sample |
|------------|------|--------------|-----------------|---------|---------------|-----------------|-----------|-----------|----------------------------------------|--------|--------------------|-----------|------------------------------------|-------------|--------------|--------------|--------------|---------------------------|-----------------------------|------------------------------------------------------|--------------------|----------------|--------|
| Wu         | 2011 | Moderate     | Cohort          | Taiwan  | Retrospective | Exhaustive      | Multisite | 2004-2009 | Children, Adolescents, Adults, Elderly | 58.1   | 36.4               | NR        | Unclear                            | NR          | NR           | NR           | NR           |                           | Laparoscopy or Open Surgery | NR                                                   | General            | NR             | 1366   |
| Wu         | 2017 | Moderate     | Cross sectional | China   | Retrospective | Consecutive     | One site  | 2014-2016 | Elderly                                | 59     | 71                 | NR        | Perforated, Suppurated, Gangrenous | 0           | 61.7         | 10           | 28.7         | 100                       | Laparoscopy or Open Surgery | 1                                                    | General            | NR             | 115    |
| Wu         | 2014 | Moderate     | Clinical trial  | China   | Prospective   | Random          | One site  | 2011-2013 | Children, Adolescents                  | 60     | 8.5                | NR        | Catarrhal                          | 100         | 0            | 0            | 0            |                           | Laparoscopy                 | 1                                                    | General            | NR             | 60     |
| Yaghoubian | 2010 | High         | Cross sectional | USA     | Retrospective | Exhaustive      | Multisite | 1998-2007 | Children, Adolescents, Adults, Elderly | 61.5   | 29.2               | NR        | Catarrhal, Perforated              | 73.4        | 26.6         | 0            | 0            |                           | Laparoscopy or Open Surgery | NR                                                   | NR                 | NR             | 4325   |
| Yagnik     | 2010 | Moderate     | Cross sectional | India   | Retrospective | Consecutive     | One site  | 2007-2009 | Children, Adolescents, Adults          | 32.5   | 23.41              | NR        | Catarrhal                          | 100         | 0            | 0            | 0            | 100                       | Laparoscopy or Open Surgery | 1                                                    | General            | NR             | 151    |
| Yousef     | 2017 | Moderate     | Cohort          | Canada  | Prospective   | Consecutive     | One site  | 2015-2016 | Children, Adolescents                  | 63.1   | 9.3                | NR        | Perforated                         | 0           | 100          | 0            | 0            | 100                       | Laparoscopy                 | NR                                                   | General            | NR             | 122    |
| Zhang      | 2015 | Moderate     | Clinical trial  | China   | Prospective   | Random          | One site  | 2012-2013 | Adults                                 | 47.2   | 30.8               | NR        | Unclear                            | 10.2        | 7.4          | 54.6         | 9.3          |                           | Laparoscopy                 | 0.9                                                  | General            | NR             | 108    |

NR: not reported

## References

1. Adejumo A.A., N.M., Mshelia, Y.M., Saleh. Clinicopathological presentation and management outcome of appendicitis in gombe, north-east nigeria: a 7-year retrospective audit. *Niger J Med.* 2015;24(4):337-43.
2. Aguiló J., S., Peiró, C., Muñoz, J., García del Caño, M., Garay, V., Viciano, et al. Adverse outcomes in the surgical treatment of acute appendicitis. Efectos adversos en la cirugía de la apendicitis aguda. 2005;78(5):312-7.
3. Adhikary S., S., Tyagi, G., Sapkota, A., Afaq, B.K., Bhattarai, C.S., Agrawal. Port exteriorization appendectomy: is it the future? *Nepal Med Coll J.* 2008;10(1):30-4.
4. Ahmad M., K., Ali, H., Latif, S., Naz, K., Said. Comparison of primary wound closure with delayed primary closure in perforated appendicitis. *J Ayub Med Coll Abbottabad.* 2014;26(2):153-7.
5. Ahmed I., J., Burr, M., Castillo, D., Collins, J.A., Cook, M., Campbell, et al. Single port/incision laparoscopic surgery compared with standard three-port laparoscopic surgery for appendectomy: A randomized controlled trial. *Surg Endosc Interv Tech.* 2015;29(1):77-85.
6. Akkoyun I., A., Taş Tuna. Advantages of abandoning abdominal cavity irrigation and drainage in operations performed on children with perforated appendicitis. *J Pediatr Surg.* 2012;47(10):1886-90.
7. Al-Saadi A.S., A.H., Al-Wadan, S.A., Hamarnah, H., Amin. Is abandoning routine peritoneal cultures during appendectomy justified? *Saudi Med J.* 2007;28(12):1827-9.
8. Al-Temimi M.H., M.A., Berglin, E.G., Kim, D.J., Tessier, S.D., Johna. Endostapler versus Hem-O-Lok clip to secure the appendiceal stump and mesoappendix during laparoscopic appendectomy. *Am J Surg.* 2017;214(6):1143-8.

9. Ali N., S., Aliyu. Appendicitis and its surgical management experience at the University of Maiduguri Teaching Hospital Nigeria. *Niger J Med.* 2012;21(2):223-6.
10. Ali K., H., Latif, S., Ahmad. Frequency of wound infection in non-perforated appendicitis with use of single dose preoperative antibiotics. *J Ayub Med Coll Abbottabad.* 2015;27(2):378-80.
11. Almström M., J.F., Svensson, B., Patkova, A., Svenningsson, T., Wester. In-hospital surgical delay does not increase the risk for perforated appendicitis in children. *Ann Surg.* 2017;265(3):616-21.
12. Álvarez-Moreno C., A.M., Pérez-Fernández, V.D., Rosenthal, J., Quintero, E., Chapeta-Parada, C., Linares, et al. Surgical site infection rates in 4 cities in Colombia: Findings of the International Nosocomial Infection Control Consortium (INICC). *Am J Infect Control.* 2014;42(10):1089-92.
13. Andert A., H.P., Alizai, C.D., Klink, N., Neitzke, C., Fitzner, C., Heidenhain, et al. Risk factors for morbidity after appendectomy. *Langenbeck's Arch Surg.* 2017;402(6):987-93.
14. Andersson R.E. Short-term complications and long-term morbidity of laparoscopic and open appendectomy in a national cohort. *Br J Surg.* 2014;101(9):1135-42.
15. Aranda-Narváez J.M., A.J., González-Sánchez, N., Marín-Camero, C., Montiel-Casado, P., López-Ruiz, B., Sánchez-Pérez, et al. Conservative approach versus urgent appendectomy in surgical management of acute appendicitis with abscess or phlegmon. Resultados del tratamiento conservador inicial y de la cirugía urgente en la apendicitis aguda evolucionada. 2010;102(11):648-52.
16. Aranda-Narváez J.M., T., Prieto-Puga Arjona, B., García-Albiach, M.C., Montiel-Casado, A.J., González-Sánchez, B., Sánchez-Pérez, et al. Postappendectomy surgical site infection: Overall rate and type according to open/laparoscopic approach. *Infección de sitio quirúrgico*

- tras apendicectomía urgente: tasa global y tipo según la vía de abordaje (abierta/laparoscópica). 2014;32(2):76-81.
17. Arthur T., R., Gartrell, B., Manoharan, D., Parker. Emergency appendicectomy in Australia: findings from a multicentre, prospective study. *ANZ J Surg.* 2017;87(9):656-60.
  18. Asefa Z. Acute appendicitis in Yirgalem Hospital, southern Ethiopia. *Ethiop Med J.* 2002;40(2):155-62.
  19. Assefa Z., A., G/yesuse. Acute appendicitis in children admitted to zewditu memorial hospital. *Ethiop Med J.* 2014;52(4):189-95.
  20. Atif M.L., F., Sadaoui, A., Bezzaoucha, C.A., BezzaouchaKaddache, R., Boukari, S., Djelato, et al. Intra-abdominal abscesses and laparoscopic versus open appendectomies. *Infect Control Hosp Epidemiol.* 2009;30(7):713-5
  21. Bae E., A., Dehal, V., Franz, M., Joannides, N., Sakis, J., Scurlock, et al. Postoperative antibiotic use and the incidence of intra-abdominal abscess in the setting of suppurative appendicitis: a retrospective analysis. *Am J Surg.* 2016;212(6):1121-5.
  22. Bae S.U., W.K., Jeong, S.K., Baek. Single-port laparoscopic interval appendectomy for perforated appendicitis with a periappendiceal abscess. *Ann Coloproctol.* 2016;32(3):105-10.
  23. Baek H.N., Y.H., Jung, Y.H., Hwang. Laparoscopic versus open appendectomy for appendicitis in elderly patients. *J Korean Soc Coloproctology.* 2011;27(5):241-5.
  24. Bali İ., F., Karateke, S., Özyazıcı, A., Kuvvetli, C., Oruç, E., Menekşe, et al. Comparison of intracorporeal knotting and endoloop for stump closure in laparoscopic appendectomy. Laparoskopik appendektomide intrakorporal düğüm ve endoloop ile güdük kapama yöntemlerinin karşılaştırılması. 2015;21(6):446-9.

25. Bhangu A., Richardson, C., Torrance, A., Pinkney, T., Collaborative, Natl Surg Res. Multicentre observational study of performance variation in provision and outcome of emergency appendectomy. *British Journal Of Surgery*. 2013;100(9):1240-52.
26. Bansal V., S., Altermatt, D., Nadal, C., Berger. Lack of benefit of preoperative antimicrobial prophylaxis in children with acute appendicitis: A prospective cohort study. *Infection*. 2012;40(6):635-41.
27. Batajoo H., N.K., Hazra. Laparoscopic versus open appendectomy in acute appendicitis. *J Nepal Health Res Counc*. 2012;10(22):239-42.
28. Saranga Bharathi R., V., Sharma, A., Chakladar, P., Kumari. Port exteriorisation appendectomy-our experience. *Med J Armed Forces India*. 2011;67(2):147-51.
29. Biçakci U., B., Tander, M., Günaydin, R., Rizalar, E., Aritürk, S.H., Ayyildiz, et al. The comparison of open and laparoscopic appendectomy: Is there any outcome difference between non-complicated and complicated appendicitis? *Balkan Med J*. 2011;28(3):304-6.
30. Bickel A., M., Gurevits, R., Vamos, S., Ivry, A., Eitan. Perioperative hyperoxygenation and wound site infection following surgery for acute appendicitis : A randomized, prospective, controlled trial. *Arch Surg*. 2011;146(4):464-70.
31. Blackwood B.P., C.D., Gause, J.C., Harris, C.M., Theodorou, I., Helenowski, T.B., Lautz, et al. Overweight and obese pediatric patients have an increased risk of developing a surgical site infection. *Surg Infect*. 2017;18(4):491-7.
32. Blakely M.L., R., Williams, M.S., Dassinger, J.W., Eubanks III, P., Fischer, E.Y., Huang, et al. Early vs interval appendectomy for children with perforated appendicitis. *Arch Surg*. 2011;146(6):660-5.

33. Bonadio W., K., Rebillot, O., Ukwuoma, C., Saracino, A., Iskhakov. Management of Pediatric Perforated Appendicitis: Comparing Outcomes Using Early Appendectomy versus Solely Medical Management. *Pediatr Infect Dis J.* 2017;36(10):937-41.
34. Boomer L.A., J.N., Cooper, K.J., Deans, P.C., Minneci, K., Leonhart, K.A., Diefenbach, et al. Does delay in appendectomy affect surgical site infection in children with appendicitis? *J Pediatr Surg.* 2014;49(6):1026-9.
35. Boomer L.A., J.N., Cooper, S., Anandalwar, S.C., Fallon, D., Ostlie, C.M., Leys, et al. Delaying appendectomy does not lead to higher rates of surgical site infections. *Ann Surg.* 2016;264(1):164-8.
36. Bozkurt M.A., M.G., Ünsal, S., Kapan, B., Kankaya, M.U., Kalaycii, H., Aliş. Two different methods for appendiceal stump closure: Metal clip and Hem-o-lok clip. *J Laparoendosc Adv Surg Techn.* 2014;24(8):571-3.
37. Brandt C., U., Hott, D., Sohr, F., Daschner, P., Gastmeier, H., Rüden. Operating room ventilation with laminar airflow shows no protective effect on the surgical site infection rate in orthopedic and abdominal surgery. *Ann Surg.* 2008;248(5):695-700.
38. Cairo S.B., M.V., Raval, M., Browne, H., Meyers, D.H., Rothstein. Association of same-day discharge with hospital readmission after appendectomy in pediatric patients. *JAMA Surg.* 2017;152(12):1106-12.
39. Cameron D.B., P., Melvin, D.A., Graham, C.C., Glass, S.K., Serres, M.P., Kronman, et al. Extended Versus Narrow-spectrum Antibiotics in the Management of Uncomplicated Appendicitis in Children: A Propensity-matched Comparative Effectiveness Study. *Ann Surg.* 2017.
40. Cao J.-G., F., Tao, X.-J., Zhou, X.-G., Wang, S.-S., Wang, H., Zhang, et al. Trends and outcomes of laparoscopic appendectomy in China: A multicenter, retrospective cohort



- study. *Surg Pract.* 2015;19(4):166-72.
41. Cervantes-Sánchez C.R., R., Gutiérrez-Vega, J.A., Vázquez-Carpizo, P., Clark, C., Athié-Gutiérrez. Syringe pressure irrigation of subdermic tissue after appendectomy to decrease the incidence of postoperative wound infection. *World J Surg.* 2000;24(1):38-42.
42. Chamisa I. A clinicopathological review of 324 appendices removed for acute appendicitis in Durban, South Africa: a retrospective analysis. *Ann R Coll Surg Engl.* 2009;91(8):688-92.
43. Chaudhary I.A., Samiullah, A.A., Mallhi, Z., Afridi, A., Bano. Is it necessary to invaginate the stump after appendicectomy? *Pak J Med Sci.* 2005;21(1):35-8.
44. Chen D., H., Shi, H., Dong, K., Liu, K., Ding. Gasless single-incision laparoscopic appendectomy. *Surg Endosc Interv Tech.* 2011;25(5):1472-6.
45. Chen C.-Y., Y.-C., Chen, H.-N., Pu, C.-H., Tsai, W.-T., Chen, C.-H., Lin. Bacteriology of acute appendicitis and its implication for the use of prophylactic antibiotics. *Surg Infect.* 2012;13(6):383-90.
46. Chen C.-C., C.-T., Ting, M.-J., Tsai, W.-C., Hsu, P.-C., Chen, M.-D., Lee, et al. Appendectomy timing: Will delayed surgery increase the complications? *J Chin Med Assoc.* 2015;78(7):395-9.
47. Chiang R.-A., S.-L., Chen, Y.-C., Tsai, M.-J., Bair. Comparison of primary wound closure versus open wound management in perforated appendicitis. *J Formos Med Assoc.* 2006;105(10):791-5.
48. Chiang R.-A., S.-L., Chen, Y.-C., Tsai. Delayed primary closure versus primary closure for wound management in perforated appendicitis: A prospective randomized controlled trial. *J Chin Med Assoc.* 2012;75(4):156-9.

49. Cho M., J., Kang, I.-K., Kim, K.Y., Lee, S.-K., Sohn. Underweight body mass index as a predictive factor for surgical site infections after laparoscopic appendectomy. *Yonsei Med J.* 2014;55(6):1611-6.
50. Choudhary S.K., S.K., Dhakaita. Appendicular mass-early appendicectomy vs interval appendicectomy. *Intl J Pharma Bio Sci.* 2014;5(1):B400-B4.
51. Clyde C., T., Bax, A., Merg, M., MacFarlane, P., Lin, S., Beyersdorf, et al. Timing of intervention does not affect outcome in acute appendicitis in a large community practice. *Am J Surg.* 2008;195(5):590-3.
52. Coakley B.A., E.S., Sussman, T.S., Wolfson, A.S., Bhagavath, J.J., Choi, N.E., Ranasinghe, et al. Postoperative antibiotics correlate with worse outcomes after appendectomy for nonperforated appendicitis. *J Am Coll Surg.* 2011;213(6):778-83.
53. Crandall M., M.B., Shapiro, M., Worley, M.A., West. Acute uncomplicated appendicitis: case time of day influences hospital length of stay. *Surg Infect (Larchmt).* 2009;10(1):65-9.
54. Dede K., T., Mersich, A., Zaránd, I., Besznyák, Z., Baranyai, B., Atkári, et al. Laparoscopic or open appendectomy? *Laparoszkópos vagy nyílt appendectomia?* 2008;149(50):2357-61.
55. Dhiman N., A., Chi, T.M., Pawlik, D.T., Efron, E.R., Haut, E.B., Schneider, et al. Increased complications after appendectomy in patients with cerebral palsy: Are special needs patients at risk for disparities in outcomes? *Surgery.* 2013;154(3):479-85.
56. Dimitriou I., B., Reckmann, O., Nephuth, M., Betzler. Single institution's experience in laparoscopic appendectomy as a suitable therapy for complicated appendicitis. *Langenbeck's Arch Surg.* 2013;398(1):147-52.

57. Durkin M.J., K.V., Dicks, A.W., Baker, S.S., Lewis, R.W., Moehring, L.F., Chen, et al. Seasonal variation of common surgical site infections: Does season matter? *Infect Control Hosp Epidemiol.* 2015;36(9):1011-6.
58. Ein S.H., A., Nasr, A., Ein. Open appendectomy for pediatric ruptured appendicitis: a historical clinical review of the prophylaxis of wound infection and postoperative intra-abdominal abscess. *Can J Surg.* 2013;56(3):E7-E12.
59. Fukuda H. Patient-related risk factors for surgical site infection following eight types of gastrointestinal surgery. *J Hosp Infect.* 2016;93(4):347-54.
60. Gandaglia G., K.R., Ghani, A., Sood, J.R., Meyers, J.D., Sammon, M., Schmid, et al. Effect of minimally invasive surgery on the risk for surgical site infections results from the national surgical quality improvement program (nsqip) database. *JAMA Surg.* 2014;149(10):1039-44.
61. Garcell H.G., A.V., Arias, C.A., Pancorbo Sandoval, E.G., García, M.E., Valle Gamboa, A.B., Sado, et al. Incidence and etiology of surgical site infections in appendectomies: A 3-year prospective study. *Oman Med J.* 2017;32(1):31-5.
62. Ghnam W.M. Elderly versus young patients with appendicitis 3 years experience. *Alex J Med.* 2012;48(1):9-12.
63. Giesen L.J., A.L., van den Boom, C.C., van Rossem, P.T., den Hoed, B.P., Wijnhoven. Retrospective Multicenter Study on Risk Factors for Surgical Site Infections after Appendectomy for Acute Appendicitis. *Dig Surg.* 2017;34(2):103-7.
64. Giiti G.C., H.D., Mazigo, J., Heukelbach, W., Mahalu. HIV, appendectomy and postoperative complications at a reference hospital in Northwest Tanzania: Cross-sectional study. *AIDS Res Ther.* 2010;7.

65. Golub A.V., R.S., Kozlov, V.G., Pleshkov, A.P., Moskalev, R.A., Alibegov, M.A., Chelombitko. Surgical Site Infections after Open Appendectomy and Effectiveness of Complex Approach to Their Prevention. *Khirurgiia (Mosk)*. 2016(6):68-76.
66. Gross T.S., C., McCracken, K.F., Heiss, M.L., Wulkan, M.V., Raval. The contribution of practice variation to length of stay for children with perforated appendicitis. *J Pediatr Surg*. 2016;51(8):1292-7.
67. Gurien L.A., D.L., Wyrick, S.D., Smith, M.S., Dassinger. Optimal timing of appendectomy in the pediatric population. *J Surg Res*. 2016;202(1):126-31.
68. Hamzaoglu I., B., Baca, D.E., Böler, E., Polat, Y., Özer. Is umbilical flora responsible for wound infection after laparoscopic surgery? *Surg Laparoscopy Endosc Percutaneous Tech*. 2004;14(5):263-7.
69. Harmon L.A., M.L., Davis, D.C., Jupiter, R.C., Frazee, J.L., Regner. Computed tomography to operating room in less than 3 hours minimizes complications from appendicitis. *Am J Surg*. 2016;212(2):246-50.
70. Helling T.S., D.F., Soltys, S., Seals. Operative versus non-operative management in the care of patients with complicated appendicitis. *Am J Surg*. 2017;214(6):1195-200.
71. Helmer K.S., E.K., Robinson, K.P., Lally, J.C., Vasquez, K.L., Kwong, T.H., Liu, et al. Standardized patient care guidelines reduce infectious morbidity in appendectomy patients. *Am J Surg*. 2002;183(6):608-13.
72. Hesami M.A., H., Alipour, H., Nikoupour Daylami, B., Alipour, S., Bazargan-Hejazi, A., Ahmadi. Irrigation of abdomen with imipenem solution decreases surgical site infections in patients with perforated appendicitis: A randomized clinical trial. *Iran Red Crescent MedJ*. 2014;16(4).

73. Horvath P., J., Lange, R., Bachmann, F., Struller, A., Königsrainer, M., Zdichavsky. Comparison of clinical outcome of laparoscopic versus open appendectomy for complicated appendicitis. *Surg Endosc Interv Tech.* 2017;31(1):199-205.
74. Hughes M.J., E., Harrison, S., Paterson-Brown. Post-operative antibiotics after appendectomy and post-operative abscess development: A retrospective analysis. *Surg Infect.* 2013;14(1):56-61.
75. Hussain M.I., M.K., Alam, H.H., Al-Qahatani, M.H., Al-Akeely. Role of postoperative antibiotics after appendectomy in non-perforated appendicitis. *J Coll Phys Surg Pak.* 2012;22(12):756-9.
76. Iqbal M., M., Jawaid, A., Qureshi, S., Iqbal. Effect of povidone-iodine irrigation on post appendectomy wound infection: Randomized control trial. *J Postgrad Med Inst.* 2015;29(3):160-4.
77. Iñigo J.J., B., Bermejo, B., Oronoz, J., Herrera, A., Tarifa, F., Pérez, et al. Surgical site infection in general surgery: 5-year analysis and assessment of the National Nosocomial Infection Surveillance (NNIS) index. *Infección de sitio quirúrgico en un servicio de cirugía general Análisis de cinco años y valoración del índice National Nosocomial Infection Surveillance (NNIS).* 2006;79(4):224-30.
78. Javadi S.M.R., S.Y., Zarghami, P., Ghaderzadeh, M., Ghorbanpoor, H.R., Makarchian, A., Derakhshanfar, et al. Comparison of small access and classic McBurney's incisions for open appendectomy: A randomized controlled trial. *Shiraz E Med J.* 2017;18(10).
79. Jenkins P.C., M.K., Oerline, A.J., Mullard, M.J., Englesbe, D.A., Campbell, M.R., Hemmila. Hospital variation in outcomes following appendectomy in a regional quality improvement program. *Am J Surg.* 2016;212(5):857-62.
80. Kang J., B.N., Bae, G., Gwak, I., Park, H., Cho, K., Yang, et al. Comparative study of a

- single-incision laparoscopic and a conventional laparoscopic appendectomy for the treatment of acute appendicitis. *J Korean Soc Coloproctology*. 2012;28(6):304-8.
81. Kapischke M., A., Pries, A., Caliebe. Short term and long term results after open vs. Laparoscopic appendectomy in childhood and adolescence: A subgroup analysis. *BMC Pediatr*. 2013;13(1).
82. Karam P.A., A., Hiuser, D., Magnuson, F.G.F., Seifarth. Intracorporeal hybrid single port vs conventional laparoscopic appendectomy in children. *Pediatr Med Chir*. 2016;38(3):89-92.
83. Karam P.A., A., Mohan, M.R., Buta, F.G., Seifarth. Comparison of Transumbilical Laparoscopically Assisted Appendectomy to Conventional Laparoscopic Appendectomy in Children. *Surg Laparoscopy Endosc Percutaneous Tech*. 2016;26(6):508-12.
84. Kasatpibal N., S., Jamulitrat, V., Chongsuvivatwong. Standardized incidence rates of surgical site infection: A multicenter study in Thailand. *Am J Infect Control*. 2005;33(10):587-94.
85. Kasatpibal N., M., Nørgaard, H.T., Sørensen, H.C., Schönheyder, S., Jamulitrat, V., Chongsuvivatwong. Risk of surgical site infection and efficacy of antibiotic prophylaxis: A cohort study of appendectomy patients in Thailand. *BMC Infect Dis*. 2006;6.
86. Kato Y., T., Marusasa, S., Ichikawa, G.J., Lane, T., Okazaki, A., Yamataka. Lapprotector use decreases incisional wound infections in cases of perforated appendicitis: a prospective study. *Asian J Surg*. 2008;31(3):101-3.
87. Kell M.R., K., Power, D.C., Winter, C., Power, C., Shields, W.O., Kirwan, et al. Predicting outcome after appendectomy. *Ir J Med Sci*. 2003;172(2):63-5.
88. Khan M.N., T., Fayyad, T.D., Cecil, B.J., Moran. Laparoscopic versus open appendectomy:

- the risk of postoperative infectious complications. *JLS*. 2007;11(3):363-7.
89. Khan K.I., S., Mahmood, M., Akmal, A., Waqas. Comparison of rate of surgical wound infection, length of hospital stay and patient convenience in complicated appendicitis between primary closure and delayed primary closure. *J Pak Med Assoc*. 2012;62(8):596-8.
90. Khan I., M.I., Khan, M., Jawed, U., Shaikh, S., Ahmed, A., Arif. To compare the frequency of superficial surgical site infection after laparoscopic versus open appendectomy. *Med Forum Monthly*. 2014;25(11):52-5.
91. Khiria L.S., R., Ardhari, N., Mohan, P., Kumar, R., Nambiar. Laparoscopic appendectomy for complicated appendicitis: Is it safe and justified? A retrospective analysis. *Surg Laparoscopy Endosc Percutaneous Tech*. 2011;21(3):142-5.
92. Kılıç Ş.S., S., Ekinçi, İ., Karnak, A.Ö., Çiftçi, F.C., Tanyel, M.E., Şenocak. Drainage systems' effect on surgical site infection in children with perforated appendicitis. *Drenaj Sistemlerinin perforate apandisitli çocuklarda cerrahi alan enfeksiyonuna etkisi*. 2016;7(5):591-4.
93. Kim M.J., F.J., Fleming, D.D., Gunzler, S., Messing, R.M., Salloum, J.R.T., Monson. Laparoscopic appendectomy is safe and efficacious for the elderly: An analysis using the National Surgical Quality Improvement Project database. *Surg Endosc Interv Tech*. 2011;25(6):1802-7.
94. Kim J.H., H.Y., Kim, S.K., Park, J.S., Lee, D.S., Heo, S.W., Park, et al. Single-incision laparoscopic appendectomy versus conventional laparoscopic appendectomy: Experiences from 1208 cases of single-incision laparoscopic appendectomy. *Ann Surg*. 2015;262(6):1054-8.
95. Kim J.K., J., Kang, W.R., Kim, E.J., Park, S.H., Baik, K.Y., Lee. Does Conversion



- Adversely Impact the Clinical Outcomes for Patients with Complicated Appendicitis? *J Laparoendosc Adv Surg Techn.* 2016;26(8):635-40.
96. Kiriakopoulos A., D., Tsakayannis, D., Linos. Laparoscopic management of complicated appendicitis. *JSLs.* 2006;10(4):453-6.
97. Kirshtein B., Z.H., Perry, S., Mizrahi, L., Lantsberg. Value of laparoscopic appendectomy in the elderly patient. *World J Surg.* 2009;33(5):918-22.
98. Kiudelis M., P., Ignatavicius, K., Zviniene, S., Grizas. Analysis of intracorporeal knotting with invaginating suture versus endoloops in appendiceal stump closure. *Wideochir Inne Tech Ma?oinwazyjne.* 2013;8(1):69-73.
99. Kleif J., L., Rasmussen, S., Fonnes, P., Tibæk, A., Daoud, H., Lund, et al. Enteral Antibiotics are Non-inferior to Intravenous Antibiotics After Complicated Appendicitis in Adults: A Retrospective Multicentre Non-inferiority Study. *World J Surg.* 2017;41(11):2706-14.
100. Koizumi N., H., Kobayashi, Y., Nakase, T., Takagi, K., Fukumoto. Efficacy of transumbilical laparoscopic-assisted appendectomy for appendicitis: a four-year experience at a single center. *Surg Today.* 2015;45(10):1245-9.
101. Shimizu T., M., Ishizuka, K., Kubota. The preoperative serum C-reactive protein level is a useful predictor of surgical site infections in patients undergoing appendectomy. *Surg Today.* 2015;45(11):1404-10.
102. Kumamoto K., H., Imaizumi, N., Hokama, T., Ishiguro, K., Ishibashi, K., Baba, et al. Recent trend of acute appendicitis during pregnancy. *Surg Today.* 2015;45(12):1521-6.
103. Kumar B., A., Samad, T.W., Khanzada, M.H., Laghari, A.R., Shaikh. Superiority of laparoscopic appendectomy over open appendectomy: The Hyderabad experience. *Rawal*

- Med J. 2008;33(2):165-8.
104. Kumar S., A., Jalan, B.N., Patowary, S., Shrestha. Laparoscopic appendectomy versus open appendectomy for acute appendicitis: A prospective comparative study. Kathmandu Univ Med J. 2016;14(55):244-8.
105. Lacher M., O.J., Muensterer, G.R., Yannam, C.J., Aprahamian, L., Perger, M., Megison, et al. Feasibility of single-incision pediatric endosurgery for treatment of appendicitis in 415 children. *J Laparoendosc Adv Surg Techn.* 2012;22(6):604-8.
106. Lasses-Martínez B., E., Ortiz-Oshiro, J.L., Cabañas-Ojeda, P., Benito-Expósito, C., Fernández-Pérez, J., Alvarez Fernández-Represa. Cost is not a drawback to perform laparoscopic appendectomy in an academic hospital. *Surg Laparoscopy Endosc Percutaneous Tech.* 2014;24(4):e123-e7.
107. Le D., W., Rusin, B., Hill, J., Langell. Post-operative antibiotic use in nonperforated appendicitis. *Am J Surg.*2009;198(6):748-52.
108. Lee P., K., Waxman, B., Taylor, S., Yim. Use of wound-protection system and postoperative wound-infection rates in open appendectomy: A randomized prospective trial. *Arch Surg.* 2009;144(9):872-5.
109. Lee S.L., S., Shekherdimian, V.Y., Chiu. Comparison of pediatric appendicitis outcomes between teaching and nonteaching hospitals. *J Pediatr Surg.* 2010;45(5):894-7.
110. Lee J.A., K.Y., Sung, J.H., Lee, D.S., Lee. Laparoscopic appendectomy with a single incision in a single institute. *J Korean Soc Coloproctology.* 2010;26(4):260-4.
111. Lee S.-Y., H.-M., Lee, C.-S., Hsieh, J.-H., Chuang. Transumbilical laparoscopic appendectomy for acute appendicitis: A reliable one-port procedure. *Surg Endosc Interv*

- Tech. 2011;25(4):1115-20.
112. Lee S.L., A., Yaghoubian, A., Kaji. Laparoscopic vs open appendectomy in children: Outcomes comparison based on age, sex, and perforation status. *Arch Surg.* 2011;146(10):1118-21.
113. Lee S.M., G.S., Hwang, D.S., Lee. Single-incision laparoscopic appendectomy using homemade glove port at low cost. *J Minimal Access Surg.* 2016;12(2):124-8.
114. Levy S.M., G., Holzman-Pazgal, K.P., Lally, K., Davis, L.S., Kao, K., Tsao. Quality check of a quality measure: Surgical wound classification discrepancies impact risk-stratified surgical site infection rates in pediatric appendicitis. *J Am Coll Surg.* 2013;217(6):969-73.
115. Li P., Q., Xu, Z., Ji, Y., Gao, X., Zhang, Y., Duan, et al. Comparison of surgical stress between laparoscopic and open appendectomy in children. *J Pediatr Surg.* 2005;40(8):1279-83.
116. Lim S.G., E.J., Ahn, S.Y., Kim, I.Y., Chung, J.-M., Park, S.H., Park, et al. A clinical comparison of laparoscopic versus open appendectomy for complicated appendicitis. *J Korean Soc Coloproctology.* 2011;27(6):293-7.
117. Geraldo José de Souza Lima, Silva, Alcino Lázaro da, Castro, Eduardo Godoy, Abras, Gustavo Munayer, Pires, Lívio José Suretti, Leite, Rodrigo Fabiano Guedes. Efetividade e segurança da apendicectomia videoassistida em porta única transumbilical em adolescentes e adultos X1 Effectiveness and safeness of single-port trans-umbilical laparoscopic appendectomy done in adolescents and adults. *Revista do Colégio Brasileiro de Cirurgiões.* 2008;35(4):244-51.
118. Lin H.-F., J.-M., Wu, L.-M., Tseng, K.-H., Chen, S.-H., Huang, I.-R., Lai. Laparoscopic

- Versus Open Appendectomy for Perforated Appendicitis. *J Gastrointest Surg.* 2006;10(6):906-10.
119. Litz C.N., S.M., Farach, P.D., Danielson, N.M., Chandler. Obesity and single-incision laparoscopic appendectomy in children. *J Surg Res.* 2016;203(2):283-6.
120. Liu C., W., Wang, Y., Sun, M., Xu, H., Zhuang, H., Chen, et al. Efficacy and complications of laparoscopic appendectomy for pediatric appendicitis. *Int J Clin Exp Med.* 2017;10(9):13784-9.
121. Mahmood M.M., A., Shahab, M.A., Razzaq. Surgical site infection in open versus laparoscopic appendectomy. *Pak J Med Health Sci.* 2016;10(3):1076-8.
122. Mbah N., W.Ek., Opara, N.P., Agwu. Waiting time among acute abdominal emergencies in a Nigerian teaching hospital: Causes of delay and consequences. *Niger J Surg Res.* 2006;8(1):69-73.
123. Memon G.A., A.I., Memon, S.K.A., Shah, R.A., Sahito, Habib-Ur-Rehman, S., Leghari, et al. An experience of treatment outcome in acute appendicitis with antibiotics and appendectomy at a tertiary care hospital. *Med Forum Monthly.* 2017;28(3):136-40.
124. Menezes M., L., Das, M., Alagtal, J., Haroun, P., Puri. Laparoscopic appendectomy is recommended for the treatment of complicated appendicitis in children. *Pediatr Surg Int.* 2008;24(3):303-5.
125. Merenda M., A., Litarski, P., Kabziński, D., Janczak. Laparoscopic appendectomy as an alternative to conventional procedure - results in our own material. *Pol Przegl Chir.* 2013;85(6):323-8.
126. Michailidou M., M.G., Sacco Casamassima, S.D., Goldstein, C., Gause, O., Karim, J.H., Salazar, et al. The impact of obesity on laparoscopic appendectomy: Results from the ACS

- National Surgical Quality Improvement Program pediatric database. *J Pediatr Surg.* 2015;50(11):1880-4.
127. Michailidou M., S.D., Goldstein, M.G., Sacco Casamassima, J.H., Salazar, R., Elliott, J., Hundt, et al. Laparoscopic versus open appendectomy in children: The effect of surgical technique on healthcare costs. *Am J Surg.* 2015;210(2):270-5.
128. Mickovic I.N., Z., Golubovic, S., Mickovic, D., Vukovic, S., Trajkovic, S.S., Antunovic, et al. A comparative analysis of laparoscopic appendectomy in relation to the open appendectomy in children. *Uporedna analiza laparoscopske apendektomije u odnosu na otvorenu apendektomiju kod dece.* 2016;17(1):49-53.
129. Ming P.C., T.Y., Yee Yan, L.H., Tat. Risk factors of postoperative infections in adults with complicated appendicitis. *Surg Laparoscopy Endosc Percutaneous Tech.* 2009;19(3):244-8.
130. Mingmalairak C., P., Ungbhakorn, V., Paocharoen. Efficacy of antimicrobial coating suture coated polyglactin 910 with tricosan (Vicryl Plus) compared with polyglactin 910 (Vicryl) in reduced surgical site infection of appendicitis, double blind randomized control trial, preliminary safety report. *J Med Assoc Thailand.* 2009;92(6):770-5.
131. Miyano G., T., Okazaki, Y., Kato, T., Marusasa, T., Takahashi, G.J., Lane, et al. Open versus laparoscopic treatment for pan-peritonitis secondary to perforated appendicitis in children: A prospective analysis. *J Laparoendosc Adv Surg Techn.* 2010;20(7):655-7.
132. Moazzez A., R.J., Mason, N., Katkhouda. Thirty-day outcomes of laparoscopic versus open appendectomy in elderly using ACS/NSQIP database. *Surg Endosc Interv Tech.* 2013;27(4):1061-71.
133. Mohammad Taghi Rajabi-Mashhadi, Mousavi, Seyed Hadi, Khosravi-Mashizi, M. H., Ghayour-Mobarhan, Majid, Sahebkar, Amirhossein. Optimum duration of perioperative

- antibiotic therapy in patients with acute non-perforated appendicitis: a prospective randomized trial. *Asian Biomedicine*. 2012;6(6):891-4.
134. Monge Jodra V., A., Robustillo Rodela, F., Martin Martinez, N., López Fresneña, S., Oña Compán, F., Calbo Torrecillas, et al. Standardized infection ratios for three general surgery procedures: A comparison between Spanish hospitals and U.S. centers participating in the national nosocomial infections surveillance system. *Infect Control Hosp Epidemiol*. 2003;24(10):744-8.
135. Mueck K.M., L.R., Putnam, K.T., Anderson, K.P., Lally, K., Tsao, L.S., Kao. Does compliance with antibiotic prophylaxis in pediatric simple appendicitis matter? *J Surg Res*. 2017;216:1-8.
136. Muensterer O.J., C., Puga Nougues, O.O., Adibe, S.R., Amin, K.E., Georgeson, C.M., Harmon. Appendectomy using single-incision pediatric endosurgery for acute and perforated appendicitis. *Surg Endosc Interv Tech*. 2010;24(12):3201-4.
137. Muensterer O.J., R., Keijzer. A simple vacuum dressing reduces the wound infection rate of single-incision pediatric endosurgical appendectomy. *J Soc Laparoendoscopic Surg*. 2011;15(2):147-50.
138. Mustafa M.I.T., S.M., Chaudhry, R.I.T., Mustafa. Comparison of early outcome between patients of open appendectomy with and without drain for perforated appendicitis. *Pak J Med Health Sci*. 2016;10(3):890-3.
139. Nadler E.P., K.K., Reblock, H.R., Ford, B.A., Gaines. Monotherapy versus multi-drug therapy for the treatment of perforated appendicitis in children. *Surg Infect*. 2003;4(4):327-33.
140. Nataraja R.M., A., Bandi, S.A., Clarke, M.J., Haddad. Comparison of intra-abdominal abscess formation following laparoscopic and open appendectomy in children. *J*

- Laparoendosc Adv Surg Techn. 2010;20(4):391-4.
141. Nataraja R.M., W.J., Teague, J., Galea, L., Moore, M.J., Haddad, T., Tsang, et al. Comparison of intraabdominal abscess formation after laparoscopic and open appendicectomies in children. *J Pediatr Surg*. 2012;47(2):317-21.
142. Norton Pérez, Romero, Marcela, Castelblanco, María Isabel, Rodríguez, Emma Isabel. Infección del sitio operatorio de apendicectomías en un hospital de la orinoquia colombiana X1 Surgical site infection following appendectomy at a hospital in the Colombian Orinoco river basin (Colombian Orinoquia). *Revista Colombiana de Cirugía*. 2009;24(1):23-30.
143. Obayashi J., K., Ohyama, S., Manabe, K., Tanaka, H., Nagae, H., Shima, et al. Are there reliable indicators predicting post-operative complications in acute appendicitis? *Pediatr Surg Int*. 2015;31(12):1189-93.
144. Obinwa O., C., Peirce, M., Cassidy, T., Fahey, J., Flynn. A model predicting perforation and complications in paediatric appendectomy. *Int J Colorectal Dis*. 2015;30(4):559-65.
145. Ohene-Yeboah M., B., Togbe. An audit of appendicitis and appendectomy in Kumasi, Ghana. *West Afr J Med*. 2006;25(2):138-43.
146. Okkyung Suh, 신완균, 강성희, 양대현. Appropriate Duration of Prophylactic Antibiotics in Acute Nonperforated Appendicitis Z1 급성 비천공성 충수염 수술시 예방적 항균제의 사용기간. *Korean Journal of Clinical Pharmacy S1 한국임상약학회지*. 2002;12(2):65-70.
147. Francisco Gabriel Onieva, Roldán, Sara, Domínguez, José Ramón, Montero, Juan Pedro, Galnares, Alfonso, Peralta, Jordi. Abordaje laparoscópico frente a enfoque clásico



- en el tratamiento de la apendicitis aguda X1 Laparoscopic approach versus classic open procedure in the treatment of acute appendicitis. *Revista Colombiana de Cirugía*. 2017;32(1):26-31.
148. Page A.J., J.D., Pollock, S., Perez, S.S., Davis, E., Lin, J.F., Sweeney. Laparoscopic Versus Open Appendectomy: An Analysis of Outcomes in 17,199 Patients Using ACS/NSQIP. *J Gastrointest Surg*. 2010;14(12):1955-62.
149. Palesty J.A., X.J., Wang, R.C., Rutland, J., Leighton, S.J., Dudrick, A., Benbrahim. Fifty-five consecutive laparoscopic appendectomy procedures without conversion. *JLS*. 2004;8(2):141-5.
150. Pandit R.K. Safe and feasible time limit for early appendectomy in appendiceal mass. *Kathmandu Univ Med J*. 2016;14(55):210-4.
151. Parcels J.P., J.P., Mileski, F.T., Gnagy, A.F., Haragan, W.J., Mileski. Using antimicrobial solution for irrigation in appendicitis to lower surgical site infection rates. *Am J Surg*. 2009;198(6):875-80.
152. Park H.-C., M.J., Kim, B.H., Lee. Effect of a Standardized Protocol of Antibiotic Therapy on Surgical Site Infection after Laparoscopic Surgery for Complicated Appendicitis. *Surg Infect*. 2017;18(6):684-8.
153. Seongmun Park, Park, Min-Su, Lee, Kil-Yeon. Relationship between the Hospital Visit-to-Operation Time Interval and the Risk of Appendiceal Perforation and Clinical Outcomes. *Journal of Minimally Invasive Surgery*. 2018;21(1):31-7.
154. Reoyo Pascual J.F., R., León Miranda, C., Cartón Hernández, E., Alonso Alonso, R.M., Martínez Castro, J., Sánchez Manuel. Laparoscopic appendectomy by 'glove port' system: Our first 100 cases. *Apendicectomía laparoscópica por sistema «glove port»*:

- nuestros primeros 100 casos. 2017;69(6):467-71.
155. Patrice Lemieux., Pascal Rheume., Isabelle Levesque., Emmanuel Bujold., Gaetan Brochu. Laparoscopic appendectomy in pregnant patients: a review of 45 cases. *Surg Endosc.* 2009; 23:1701.
156. Patel S.C., G.F., Jumba, S., Akmal. Laparoscopic appendicectomy at the Aga Khan Hospital, Nairobi. *East Afr Med J.* 2003;80(9):447-51.
157. Percy C., K., Almahmoud, T., Jackson, C., Hartline, A., Cahill, L., Spence, et al. Risky business? Investigating outcomes of patients undergoing urgent laparoscopic appendectomy on antithrombotic therapy. *Am J Surg.* 2017;214(6):1012-5.
158. Pishori T., A.R., Siddiqui, M., Ahmed. Surgical wound infection surveillance in general surgery procedures at a teaching hospital in Pakistan. *Am J Infect Control.* 2003;31(5):296-301.
159. Putnam L.R., T.G., Ostovar-Kermani, A., Le Blanc, K.T., Anderson, G., Holzmann-Pazgal, K.P., Lally, et al. Surgical site infection reporting: more than meets the agar. *J Pediatr Surg.* 2017;52(1):156-60.
160. Al-Qahtani S.M., H.M., Al-Amoudi, S., Al-Jehani, A.S., Ashour, M.R., Abd-Hammad, O.R., Tawfik, et al. Post-appendectomy surgical site infection rate after using an antimicrobial film incise drape: A prospective study. *Surg Infect.* 2015;16(2):155-8.
161. Quezada F., N., Quezada, R., Mejia, A., Brañes, O., Padilla, N., Jarufe, et al. Laparoscopic versus open approach in the management of appendicitis complicated exclusively with peritonitis: A single center experience. *Int J Surg.* 2015;13:80-3.
162. Raakow J., H.-G., Liesaus, P., Neuhaus, R., Raakow. Single-incision versus multiport laparoscopic appendectomy: a case-matched comparative analysis. *Surg Endosc Interv*

- Tech. 2015;29(6):1530-6.
163. Ríos J., C., Murillo, G., Carrasco, C., Humet. Increase in costs attributable to surgical infection after appendectomy and colectomy. Incremento de costes atribuible a la infección quirúrgica de la apendicectomía y colectomía. 2003;17(3):218-25.
164. Rafiq M.S., M.M., Khan, A., Khan, H., Jan. Evaluation of postoperative antibiotics after non-perforated appendectomy. J Pak Med Assoc. 2015;65(8):815-7.
165. Reinisch A., J., Heil, G., Woeste, W., Bechstein, J., Liese. The meteorological influence on seasonal alterations in the course of acute appendicitis. J Surg Res. 2017;217:137-43.
166. Romano A., P., Parikh, P., Byers, N., Namias. Simple acute appendicitis versus non-perforated gangrenous appendicitis: Is there a difference in the rate of post-operative infectious complications? Surg Infect. 2014;15(5):517-20.
167. Romel Hilaire, Fernández, Zenén Rodríguez, García, Lázaro Ibrahim Romero, Sánchez, Luis Pablo Rodríguez. Apendicectomía videolaparoscópica frente a apendicectomía convencional X1 Laparoscopic versus conventional appendectomy. Revista Cubana de Cirugía. 2014;53(1):30-40.
168. Romy S., M.-C., Eisenring, V., Bettschart, C., Petignat, P., Francioli, N., Troillet. Laparoscope use and surgical site infections in digestive surgery. Ann Surg. 2008;247(4):627-32.
169. Rooh-ul-Muqim, M., Khan, M., Zarin. Experience of laparoscopic appendectomies versus open appendectomies. Pak J Med Sci. 2010;26(2):324-8.
170. Van Rossem C.C., M.H.F., Schreinemacher, K., Treskes, R.M., Van Hogezaand, A.A.W., Van Geloven. Duration of antibiotic treatment after appendectomy for acute

- complicated appendicitis. *Br J Surg*. 2014;101(6):715-9.
171. Van Rossem C.C., M.D., Bolmers, M.H., Schreinemacher, A.A., van Geloven, W.A., Bemelman. Prospective nationwide outcome audit of surgery for suspected acute appendicitis. *Br J Surg*. 2016;103(1):144-51.
172. Viet Hung N., T., Anh Thu, V.D., Rosenthal, D., Tat Thanh, N., Quoc Anh, N., Le Bao Tien, et al. Surgical site infection rates in seven cities in Vietnam: Findings of the international nosocomial infection control consortium. *Surg Infect*. 2016;17(2):243-9.
173. Rotermann M. Infection after cholecystectomy, hysterectomy or appendectomy. *Health Rep*. 2004;15(4):11-23.
174. Saar S., P., Talving, J., Laos, T., Pödrämägi, M., Sokirjanski, T., Lustenberger, et al. Delay Between Onset of Symptoms and Surgery in Acute Appendicitis Increases Perioperative Morbidity: A Prospective Study. *World J Surg*. 2016;40(6):1308-14.
175. Saber A.A., M.H., Elgamal, T.H., El-Ghazaly, A.V., Dewoolkar, A., Akl. Simple technique for single incision transumbilical laparoscopic appendectomy. *Int J Surg*. 2010;8(2):128-30.
176. Sadraei-Moosavi S.-M., N., Nikhbakhsh, A.-A., Darzi. Postoperative antibiotic therapy after appendectomy in patients with non-perforated appendicitis. *Caspian J Int Med*. 2017;8(2):104-7.
177. Saha N., D.K., Saha, M.A., Rahman, M.K., Islam, M.A., Aziz. Comparison of post operative morbidity between laparoscopic and open appendectomy in children. *Mymensingh Med J*. 2010;19(3):348-52.
178. Sahm M., R., Kube, S., Schmidt, C., Ritter, M., Pross, H., Lippert. Current analysis of endoloops in appendiceal stump closure. *Surg Endosc Interv Tech*. 2011;25(1):124-9.
179. Sahm M., M., Pross, R., Otto, A., Koch, I., Gastinger, H., Lippert. Clinical health service

- research on the surgical therapy of acute appendicitis: Comparison of outcomes based on 3 German multicenter quality assurance studies over 21 years. *Ann Surg.* 2015;262(2):338-46.
180. Salö M., E., Järbur, M., Hambraeus, B., Ohlsson, P., Stenström, E., Arnbjörnsson. Two-trocar appendectomy in children - description of technique and comparison with conventional laparoscopic appendectomy. *BMC Surg.* 2016;16(1):52.
181. Sánchez-Santana T., J.A., del-Moral-Luque, P., Gil-Yonte, L., Bañuelos-Andrío, M., Durán-Poveda, G., Rodríguez-Caravaca. Effect of compliance with an antibiotic prophylaxis protocol in surgical site infections in appendectomies. Prospective cohort study. Efecto de la adecuación a protocolo de la profilaxis antibiótica en la incidencia de infección quirúrgica en apendicectomías Estudio de cohortes prospectivo. 2017;85(3):208-13.
182. Sauvain M.-O., K., Slankamenac, M.K., Muller, S., Wildi, U., Metzger, W., Schmid, et al. Delaying surgery to perform CT scans for suspected appendicitis decreases the rate of negative appendectomies without increasing the rate of perforation nor postoperative complications. *Langenbeck's Arch Surg.* 2016;401(5):643-9.
183. Scarborough J.E., K.M., Bennett, T.N., Pappas. Racial disparities in outcomes after appendectomy for acute appendicitis. *Am J Surg.* 2012;204(1):11-7.
184. Seifarth F.G., N., Kundu, A.D., Guerron, M.M., Garland, M.W., Gaffley, S., Worley, et al. Umbilical Negative Pressure Dressing for Transumbilical Appendectomy in Children. *JSLs.* 2016;20(4).
185. Federico G. Seifarth, Kundu, Neilendu, Guerron, Alfredo D., Garland, Mary M., Gaffley, Michaela W. G., Worley, Sarah, et al. Umbilical Negative Pressure Dressing for Transumbilical Appendectomy in Children. *JSLs-JOURNAL OF THE SOCIETY OF LAPAROENDOSCOPIC SURGEONS.* 2016;20(4).
186. Senekjian L., R., Nirula. Tailoring the operative approach for appendicitis to the patient:

- A prediction model from national surgical quality improvement program data. *J Am Coll Surg.* 2013;216(1):34-40.
187. Sesia S.B., M., Frech, F.-M., Häcker, J., Mayr. Laparoscopic "single-port" appendectomy in children. *Laparoskopische "single port"-appendektomie im kindesalter.* 2011;136(1):50-5.
188. Shaikh A.R., S., Khatoon, M., Arif. Evaluation of re-admission after open appendicectomy. *Rawal Med J.* 2011;36(2):100-3.
189. Shang Q., Q., Geng, X., Zhang, C., Guo. The efficacy of combined therapy with metronidazole and broad-spectrum antibiotics on postoperative outcomes for pediatric patients with perforated appendicitis. *Medicine.* 2017;96(47).
190. Shindholimath V., K., Thinakaran, T., Rao, Y., Veerappa. Laparoscopic management of appendicular mass. *J Minimal Access Surg.* 2011;7(2):136-40.
191. Shimizu T., M., Ishizuka, K., Kubota. The preoperative serum C-reactive protein level is a useful predictor of surgical site infections in patients undergoing appendectomy. *Surg Today.* 2015;45(11):1404-10.
192. Siam B., A., Al-Kurd, N., Simanovsky, H., Awesat, Y., Cohn, B., Helou, et al. Comparison of appendectomy outcomes between senior general surgeons and general surgery residents. *JAMA Surg.* 2017;152(7):679-85.
193. 서승원, 김신곤. Acute Appendicitis in Pregnant Patients and Non-Pregnant Patients: Recent Clinical Experience of the Tertiary Hospital Z1 임신부와 가임기 여성의 급성 충수염의 비교 고찰: 최근 3차 병원의 임상적 경험. *Annals of Surgical Treatment and Research S1 대한외과학회지.* 2002;62(6):486-90.

194. Alfredo Silva, M, Guido Vargas, A, Amparo Moreno, H, Pablo Becerra. Utilidad del retractor elástico abdominal para disminuir el riesgo de infección de herida operatoria en apendicitis aguda X1 Use of an elasticwall retractor during appendectomy to reduce wound infection. *Revista chilena de cirugía*. 2008;60(6):527-33.
195. Singh V.K., K., Nishant, B., Kharga, A.K., Kalita, P., Bhutia, J., Jain. Randomized controlled trial comparing open, conventional, and single port laparoscopic appendectomy. *J Clin Diagn Res*. 2017;11(10):PC05-PC10.
196. Siribumrungwong B., K., Srikuea, A., Thakkinstian. Comparison of superficial surgical site infection between delayed primary and primary wound closures in ruptured appendicitis. *Asian J Surg*. 2014;37(3):120-4.
197. Sivrikoz E., E., Karamanos, E., Beale, P., Teixeira, K., Inaba, D., Demetriades. The effect of diabetes on outcomes following emergency appendectomy in patients without comorbidities: A propensity score-matched analysis of National Surgical Quality Improvement Program database. *Am J Surg*. 2015;209(1):206-11.
198. Soll C., P., Wyss, H., Gelpke, D.A., Raptis, S., Breitenstein. Appendiceal stump closure using polymeric clips reduces intra-abdominal abscesses. *Langenbeck's Arch Surg*. 2016;401(5):661-6.
199. Sozutek A., T., Colak, M., Dirlik, K., Ocal, O., Turkmenoglu, A., Dag. A prospective randomized comparison of single-port laparoscopic procedure with open and standard 3-port laparoscopic procedures in the treatment of acute appendicitis. *Surg Laparoscopy Endosc Percutaneous Tech*. 2013;23(1):74-8.
200. Srishewachart P., S., Narksut. Incidence of abnormal preoperative blood testing and postoperative complication in appendectomy patients in Siriraj Hospital. *J Med Assoc Thailand*. 2016;99(5):517-24.



201. Staszewicz W., M.-C., Eisenring, V., Bettschart, S., Harbarth, N., Troillet. Thirteen years of surgical site infection surveillance in Swiss hospitals. *J Hosp Infect.* 2014;88(1):40-7.
202. Suttie S.A., S., Seth, C.P., Driver, A.A., Mahomed. Outcome after intra- and extra-corporeal laparoscopic appendectomy techniques. *Surg Endosc.* 2004;18(7):1123-5.
203. Svensson J.F., B., Patkova, M., Almström, S., Eaton, T., Wester. Outcome after introduction of laparoscopic appendectomy in children: A cohort study. *J Pediatr Surg.* 2016;51(3):449-53.
204. Taguchi Y., S., Komatsu, E., Sakamoto, S., Norimizu, Y., Shingu, H., Hasegawa. Laparoscopic versus open surgery for complicated appendicitis in adults: a randomized controlled trial. *Surg Endosc Interv Tech.* 2016;30(5):1705-12.
205. Tanaka S., D., Kubota, S.H., Lee, K., Oba, M., Matsuyama. Effectiveness of laparoscopic approach for acute appendicitis. *Osaka City Med J.* 2007;53(1):1-8.
206. Tijerina J., R., Velasco-Rodríguez, C., Vásquez, V., Melnikov, S., Rodriguez. Effectiveness of a systemic antibiotic followed by topical ionized solution as surgical site infection prophylaxis. *J Int Med Res.* 2010;38(4):1287-93.
207. The SCARLESS Study Group. Single port/incision laparoscopic surgery compared with standard three-port laparoscopic surgery for appendectomy: A randomized controlled trial. *Surg Endosc Interv Tech.* 2015;29(1):77-85.
208. Juan Pablo Toro, Barrera, Óscar Javier, Morales, Carlos Hernando. Superioridad clínica de la apendicectomía laparoscópica sobre la técnica abierta: ¿Adopción lenta de un nuevo estándar de tratamiento? X1 Clinical superiority of laparoscopic appendectomy over the open technique: sluggish adoption of a new standard of treatment? *Revista Colombiana de Cirugía.* 2017;32(1):32-9.
209. Towfigh S., T., Clarke, W., Yacoub, A.H., Pooli, R.J., Mason, N., Katkhouda, et al. Significant reduction of wound infections with daily probing of contaminated wounds : A

- prospective randomized clinical trial. *Arch Surg.* 2011;146(4):448-52.
210. Troillet N., E., Aghayev, M.-C., Eisenring, A.F., Widmer. First Results of the Swiss National Surgical Site Infection Surveillance Program: Who Seeks Shall Find. *Infect Control Hosp Epidemiol.* 2017;38(6):697-704.
211. Tsioplis C., C., Brockschmidt, S., Sander, D., Henne-Bruns, M., Kornmann. Factors influencing the course of acute appendicitis in adults and children. *Langenbeck's Arch Surg.* 2013;398(6):857-67.
212. Vahdad M.R., M., Nissen, A., Semaan, T., Klein, E., Palade, T., Boemers, et al. Experiences with LESS-appendectomy in Children. *Arch Iran Med.* 2016;19(1):57-63.
213. Van Rossem C.C., M.H.F., Schreinemacher, A.A.W., Van Geloven, W.A., Bemelman, G.J.D., Van Acker, B., Akkermans, et al. Antibiotic duration after laparoscopic appendectomy for acute complicated appendicitis. *JAMA Surg.* 2016;151(4):323-9.
214. Van Rossem C.C., M.H.F., Schreinemacher, K., Treskes, R.M., Van Hogeand, A.A.W., Van Geloven. Duration of antibiotic treatment after appendectomy for acute complicated appendicitis. *Br J Surg.* 2014;101(6):715-9.
215. Wang-Chan A., F.H., Hetzer, C., Gingert, C., Gingert, E., Angst, E., Angst, et al. Clinical relevance and effect of surgical wound classification in appendicitis: Retrospective evaluation of wound classification discrepancies between surgeons, Swissnoso-trained infection control nurse, and histology as well as surgical site infection rates by wound class. *J Surg Res.* 2017;215:132-9.
216. Watanabe A., S., Kohnoe, H., Sonoda, K., Shirabe, K., Fukuzawa, S., Maekawa, et al. Effect of intra-abdominal absorbable sutures on surgical site infection. *Surg Today.* 2012;42(1):52-9.
217. Willis Z.I., E.M., Duggan, B.T., Bucher, J.B., Pietsch, M., Milovancev, W., Wharton, et al. Effect of a clinical practice guideline for pediatric complicated appendicitis. *JAMA Surg.* 2016;151(5).

218. Ramírez-Wong F.M., T., Atencio-Espinoza, V.D., Rosenthal, E., Ramirez, S.L., Torres-Zegarra, Z.R., Díaz Tavera, et al. Surgical Site Infections Rates in More Than 13,000 Surgical Procedures in Three Cities in Peru: Findings of the International Nosocomial Infection Control Consortium. *Surg Infect*. 2015;16(5):572-6.
219. Wu J.-M., K.-H., Chen, H.-F., Lin, L.-M., Tseng, S.-H., Tseng, S.-H., Huang. Laparoscopic appendectomy in pregnancy. *J Laparoendosc Adv Surg Techn Part A*. 2005;15(5):447-50.
220. Wu H.-S., H.-W., Lai, S.-J., Kuo, Y.-T., Lee, D.-R., Chen, C.-W., Chi, et al. Competitive edge of laparoscopic appendectomy versus open appendectomy: A subgroup comparison analysis. *J Laparoendosc Adv Surg Techn*. 2011;21(3):197-202.
221. Wu K., L., Yang, A., Wu, J., Wang, S., Xu, H., Zhao, et al. Single-site laparoscopic appendectomy in children using conventional instruments: a prospective, randomized, control trial. *Pediatr Surg Int*. 2014;31(2):167-71.
222. Wu T.-C., Q., Lu, Z.-Y., Huang, X.-H., Liang. Efficacy of emergency laparoscopic appendectomy in treating complicated appendicitis for elderly patients. *Saudi Med J*. 2017;38(11):1108-12.
223. Yaghoubian A., C., de Virgilio, V., Chiu, S.L., Lee. "July effect" and appendicitis. *J Surg Educ*. 2010;67(3):157-60.
224. Yagnik V., J., Rathod, A., Phatak. A retrospective study of two-port appendectomy and its comparison with open appendectomy and three-port appendectomy. *Saudi J Gastroenterol*. 2010;16(4):268-71.
225. Yousef Y., F., Youssef, M., Homsy, T., Dinh, K., Pandya, H., Stagg, et al. Standardization of care for pediatric perforated appendicitis improves outcomes. *J Pediatr Surg*. 2017;52(12):1916-20.
226. Zhang Z., Y., Wang, R., Liu, L., Zhao, H., Liu, J., Zhang, et al. Suprapubic single-

incision versus conventional laparoscopic appendectomy. *J Surg Res.* 2016;200(1):131-8.
